# Supplementary material for: Chemo- and optogenetic activation of hypothalamic Foxb1-expressing neurons and their terminal endings in the rostral-dorsolateral PAG leads to tachypnea, bradycardia, and immobility
Source: eLife journal article supplement (doi:10.7554/elife.86737), 2023-05-25

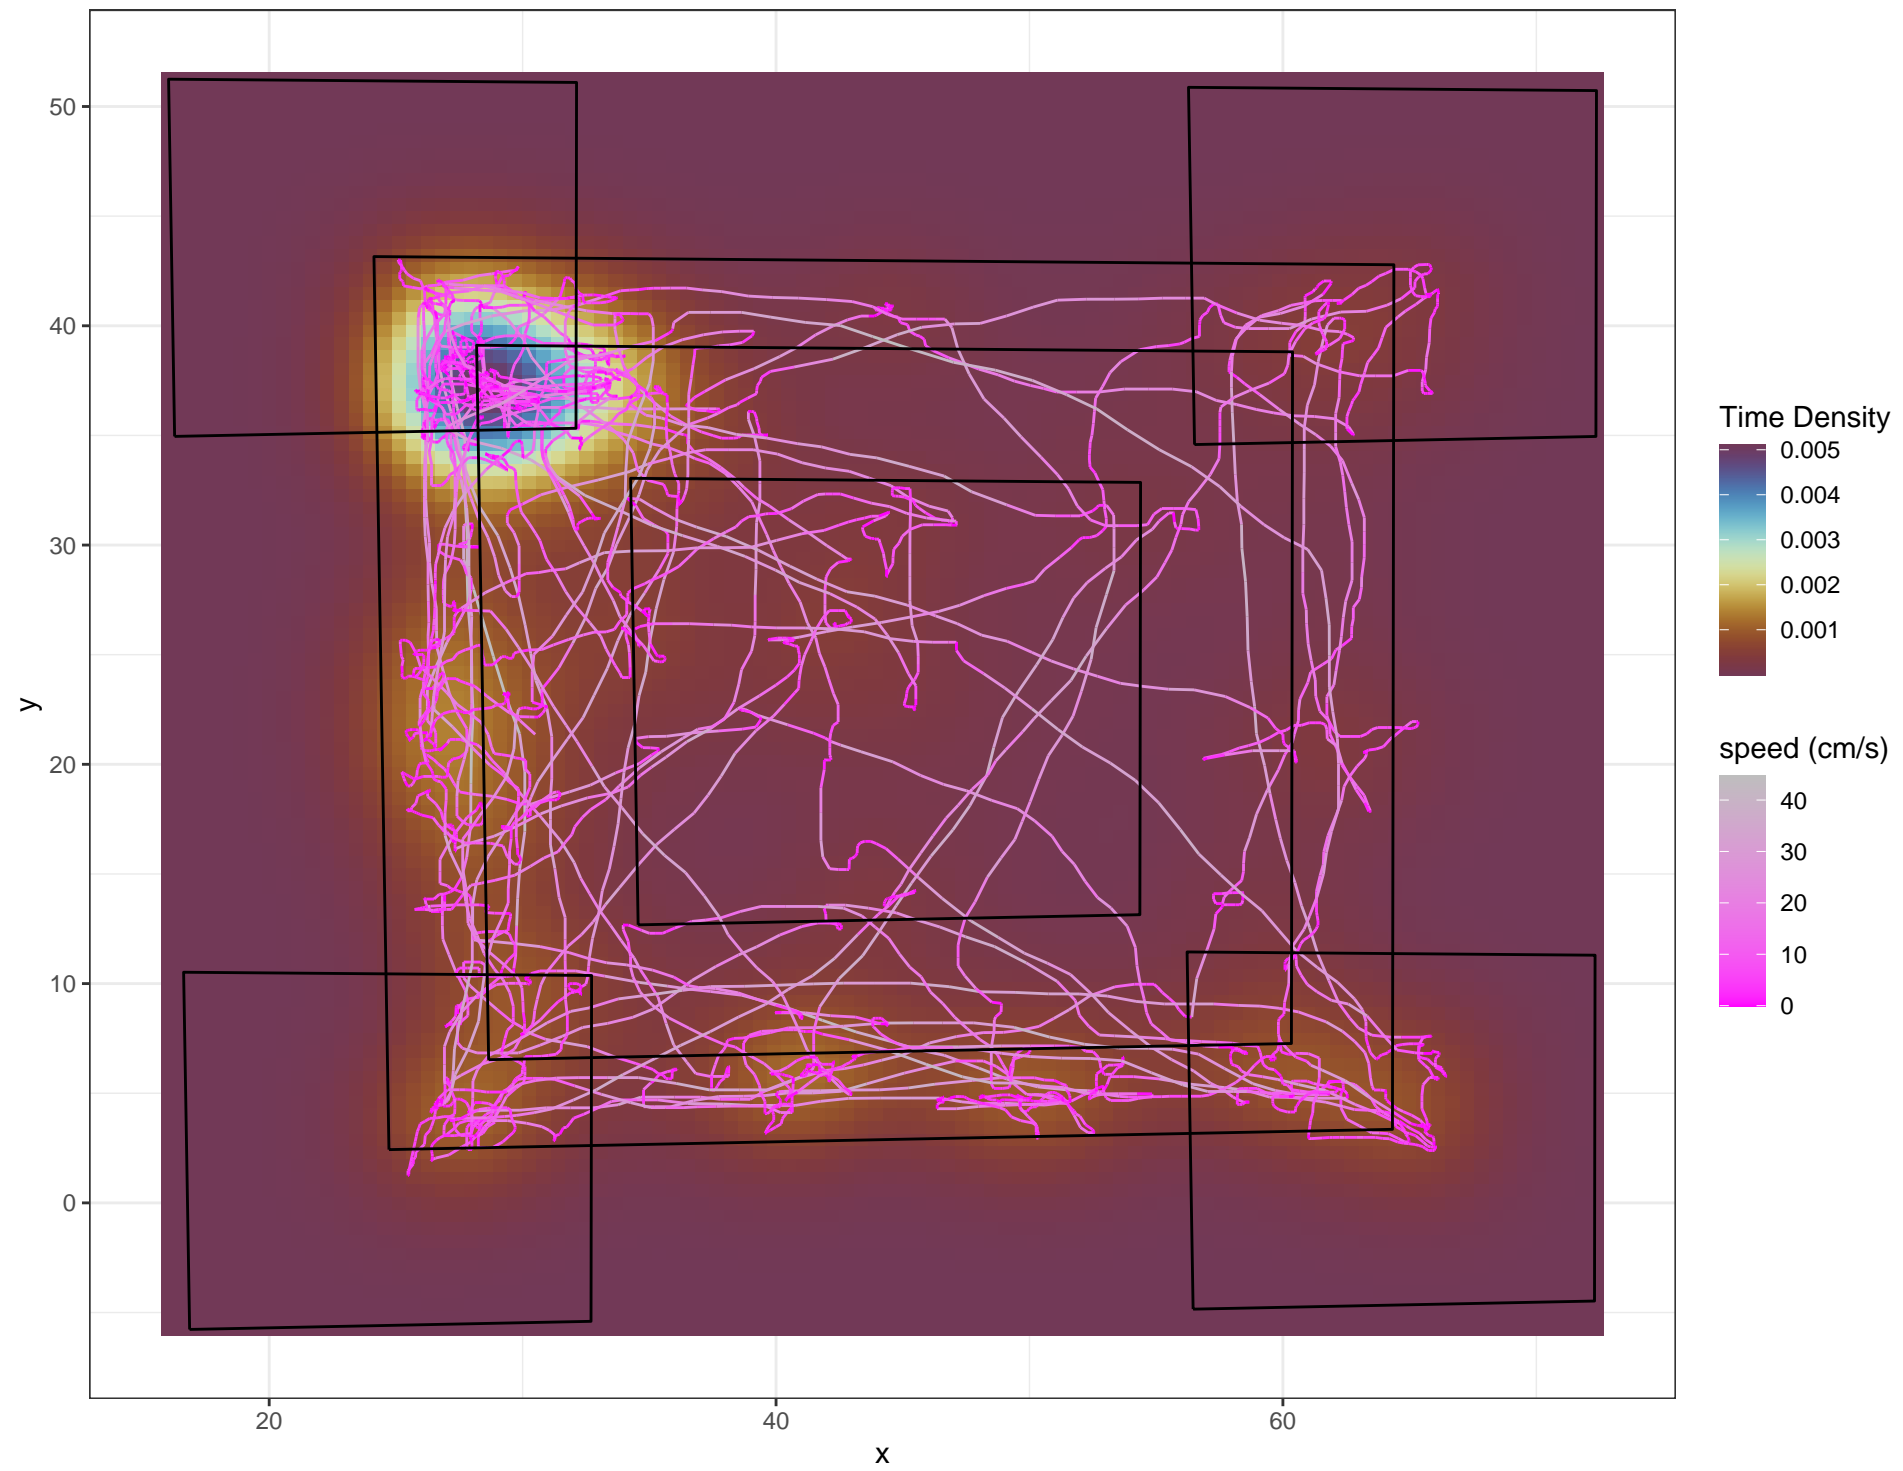

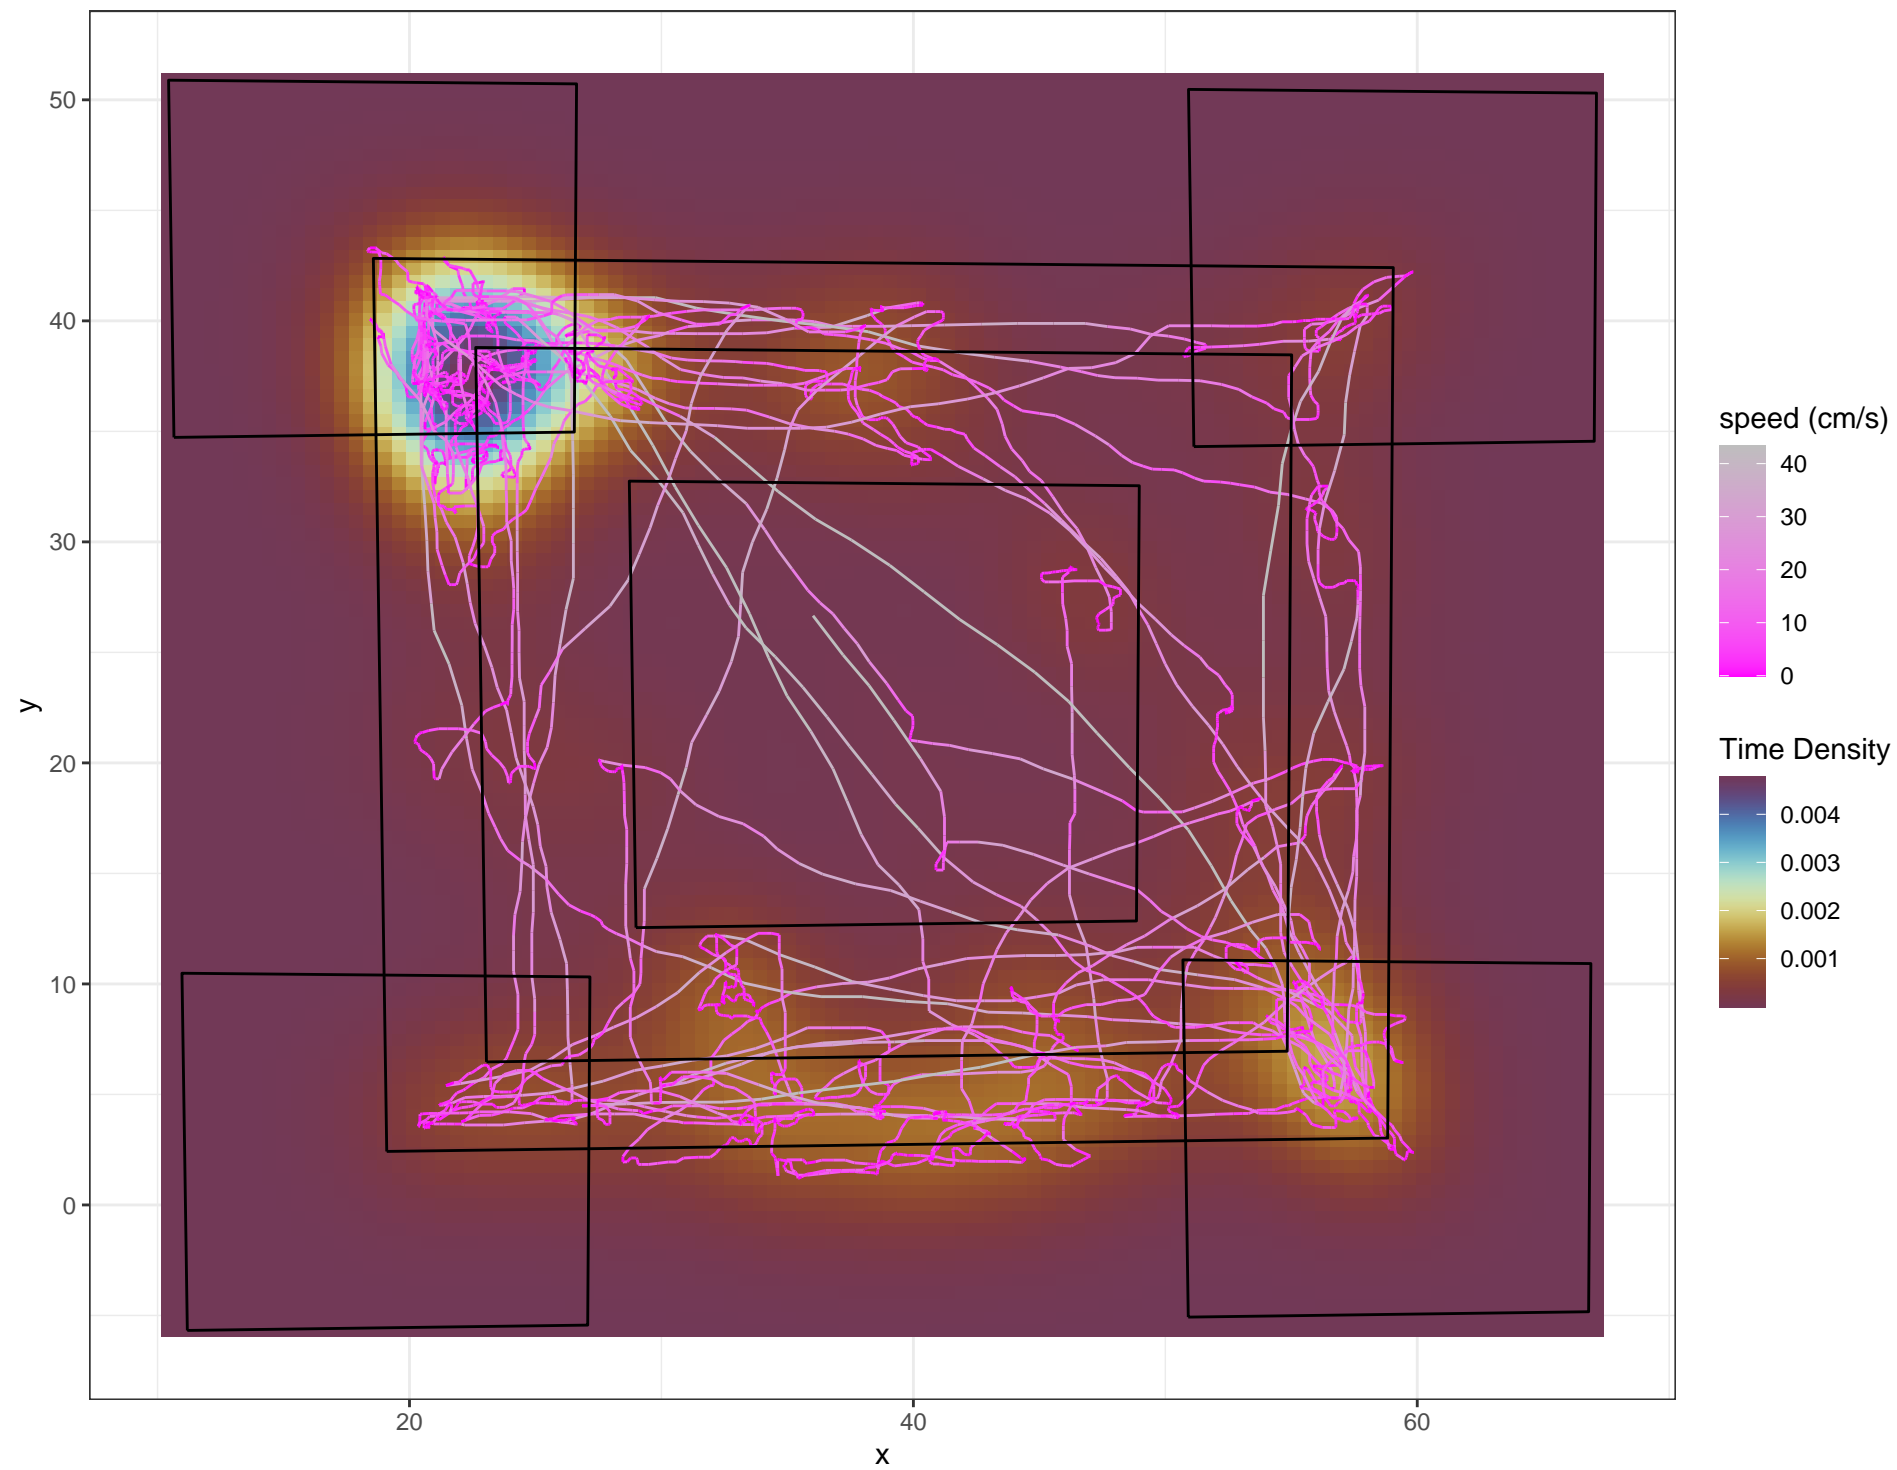

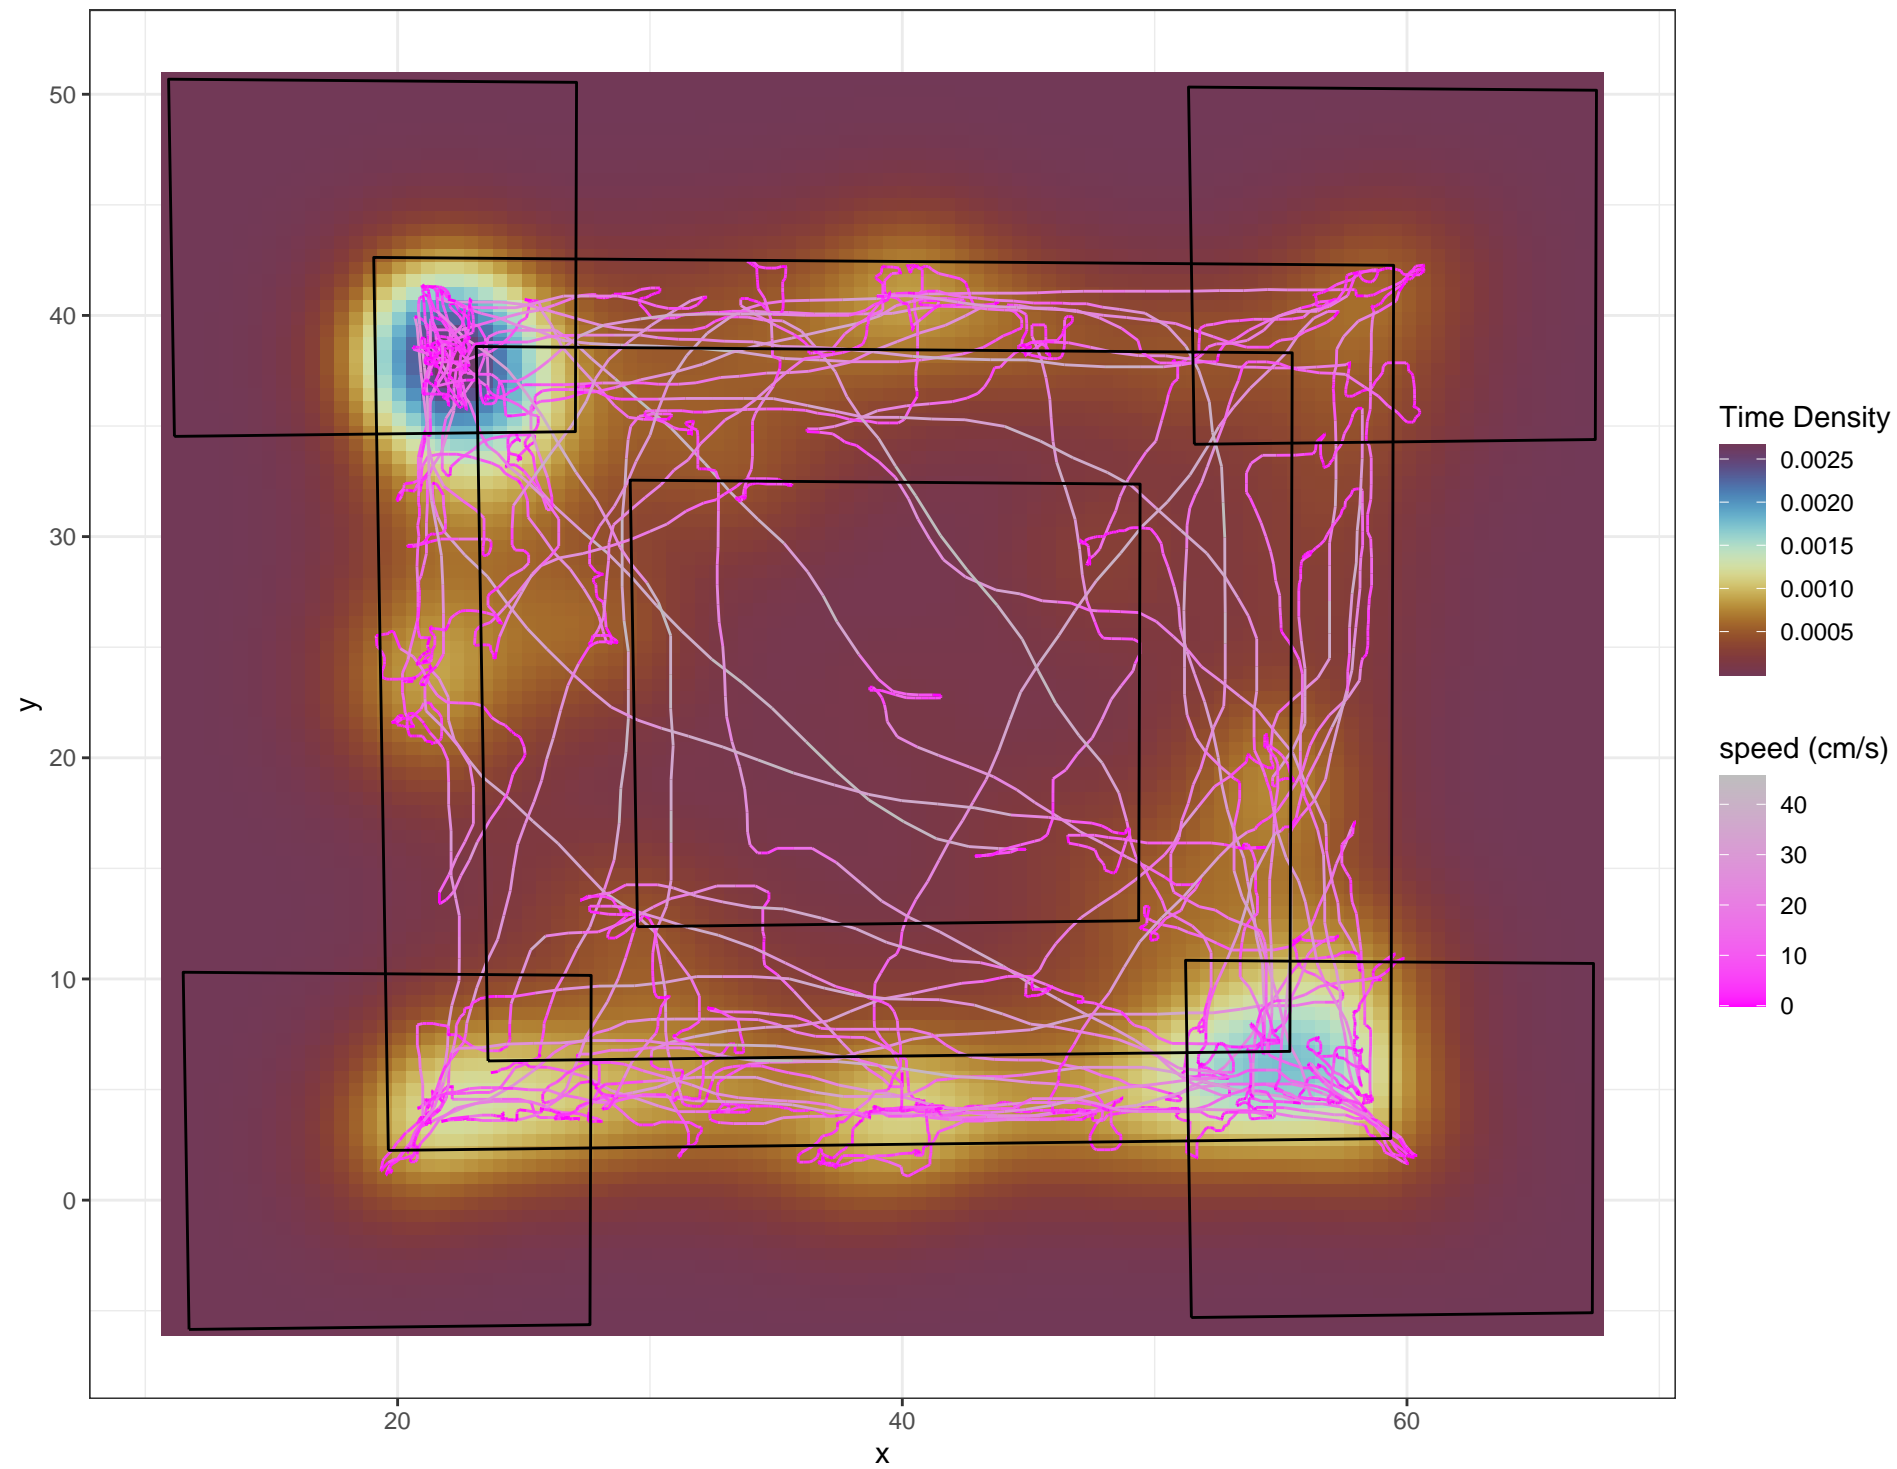

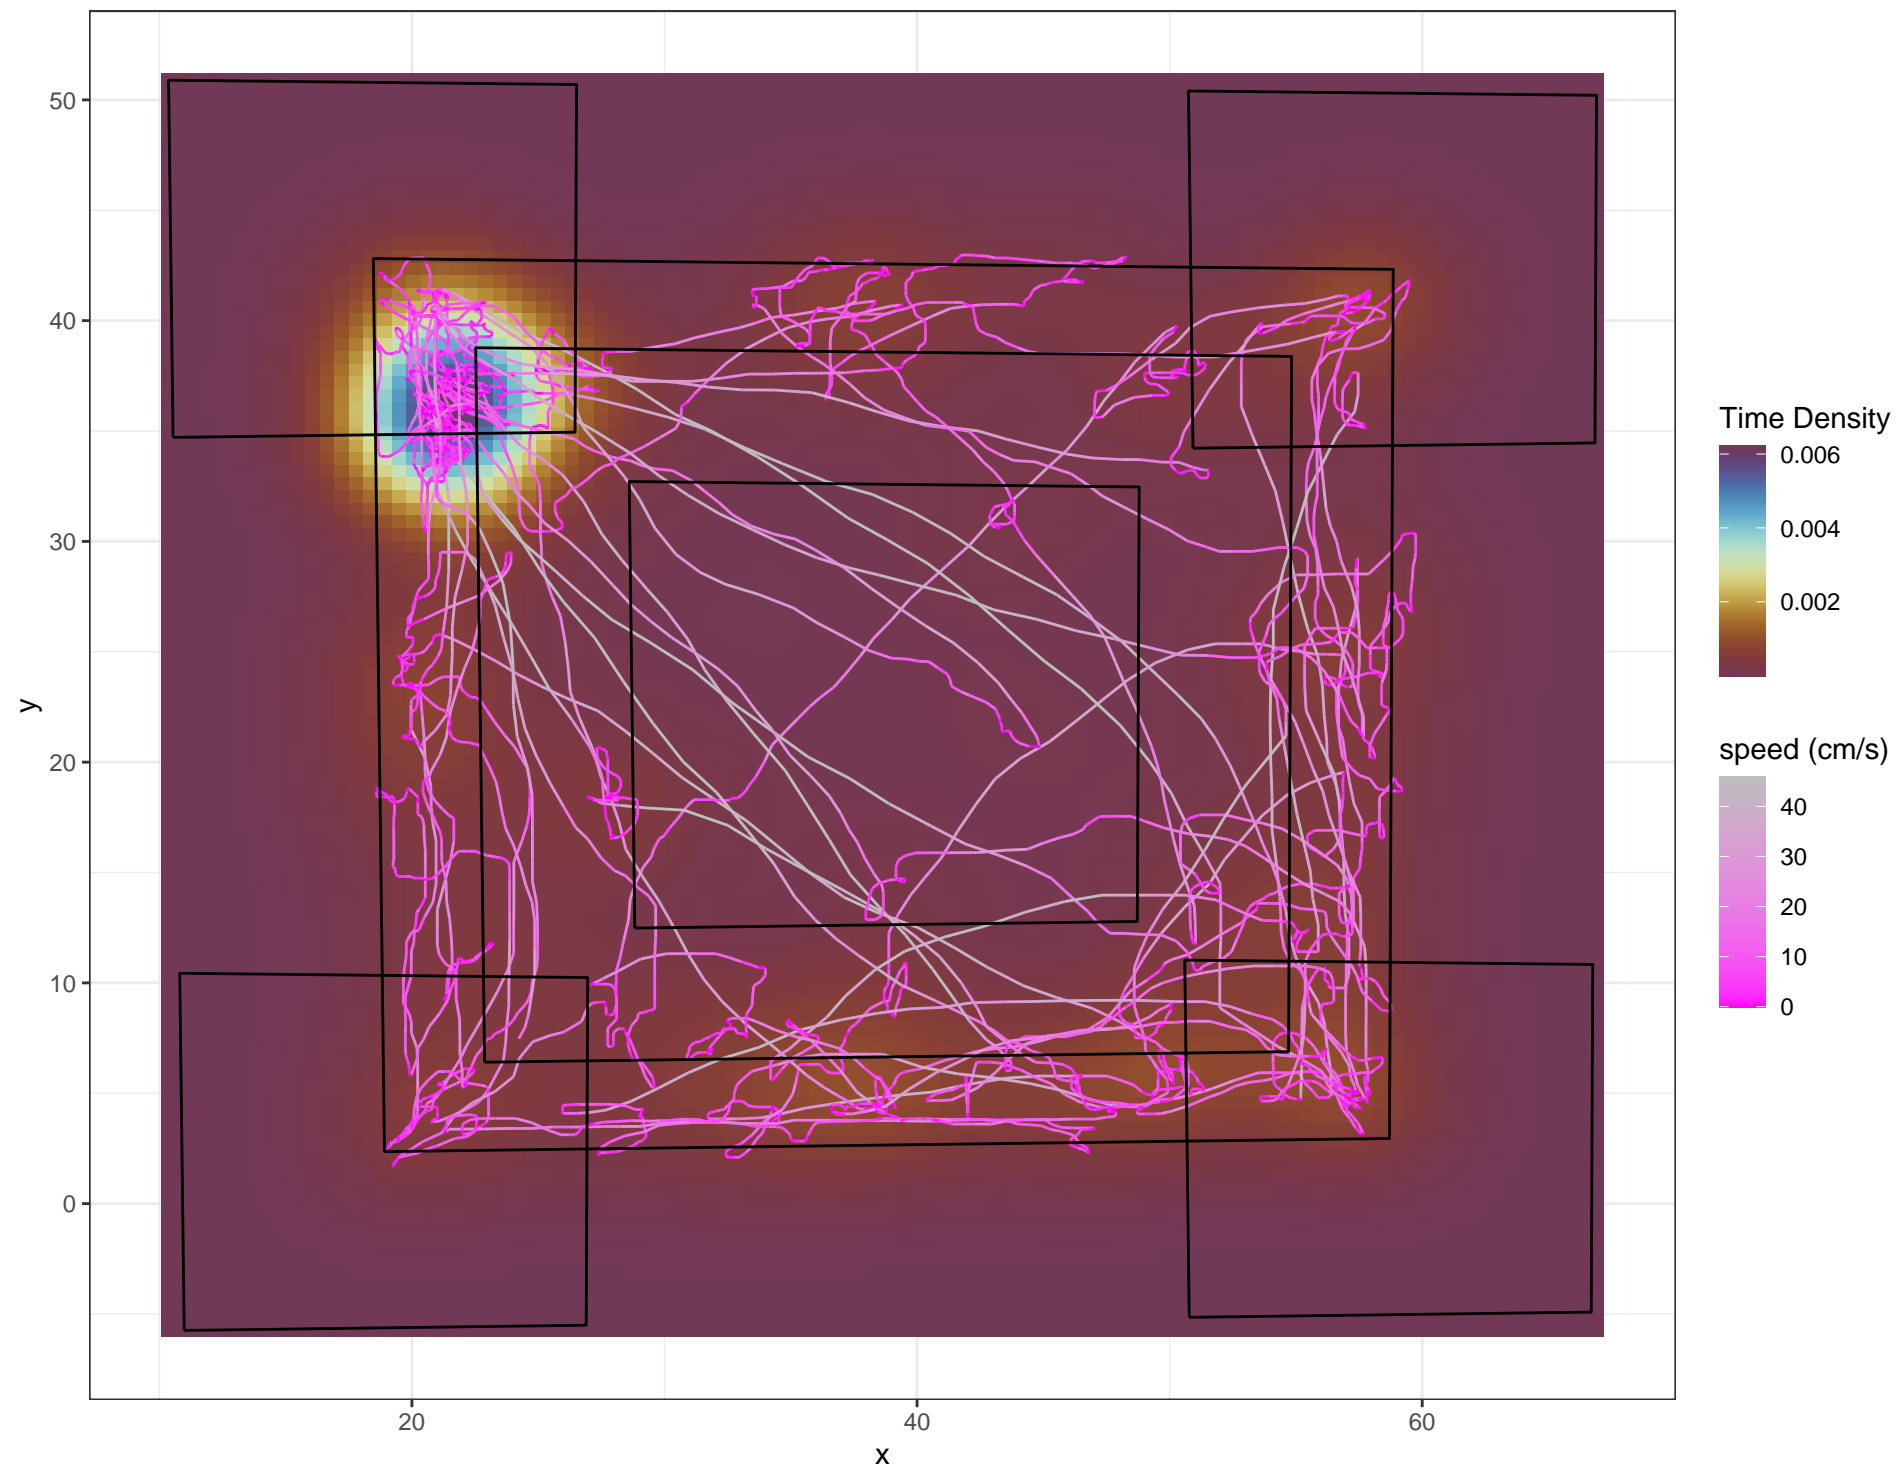

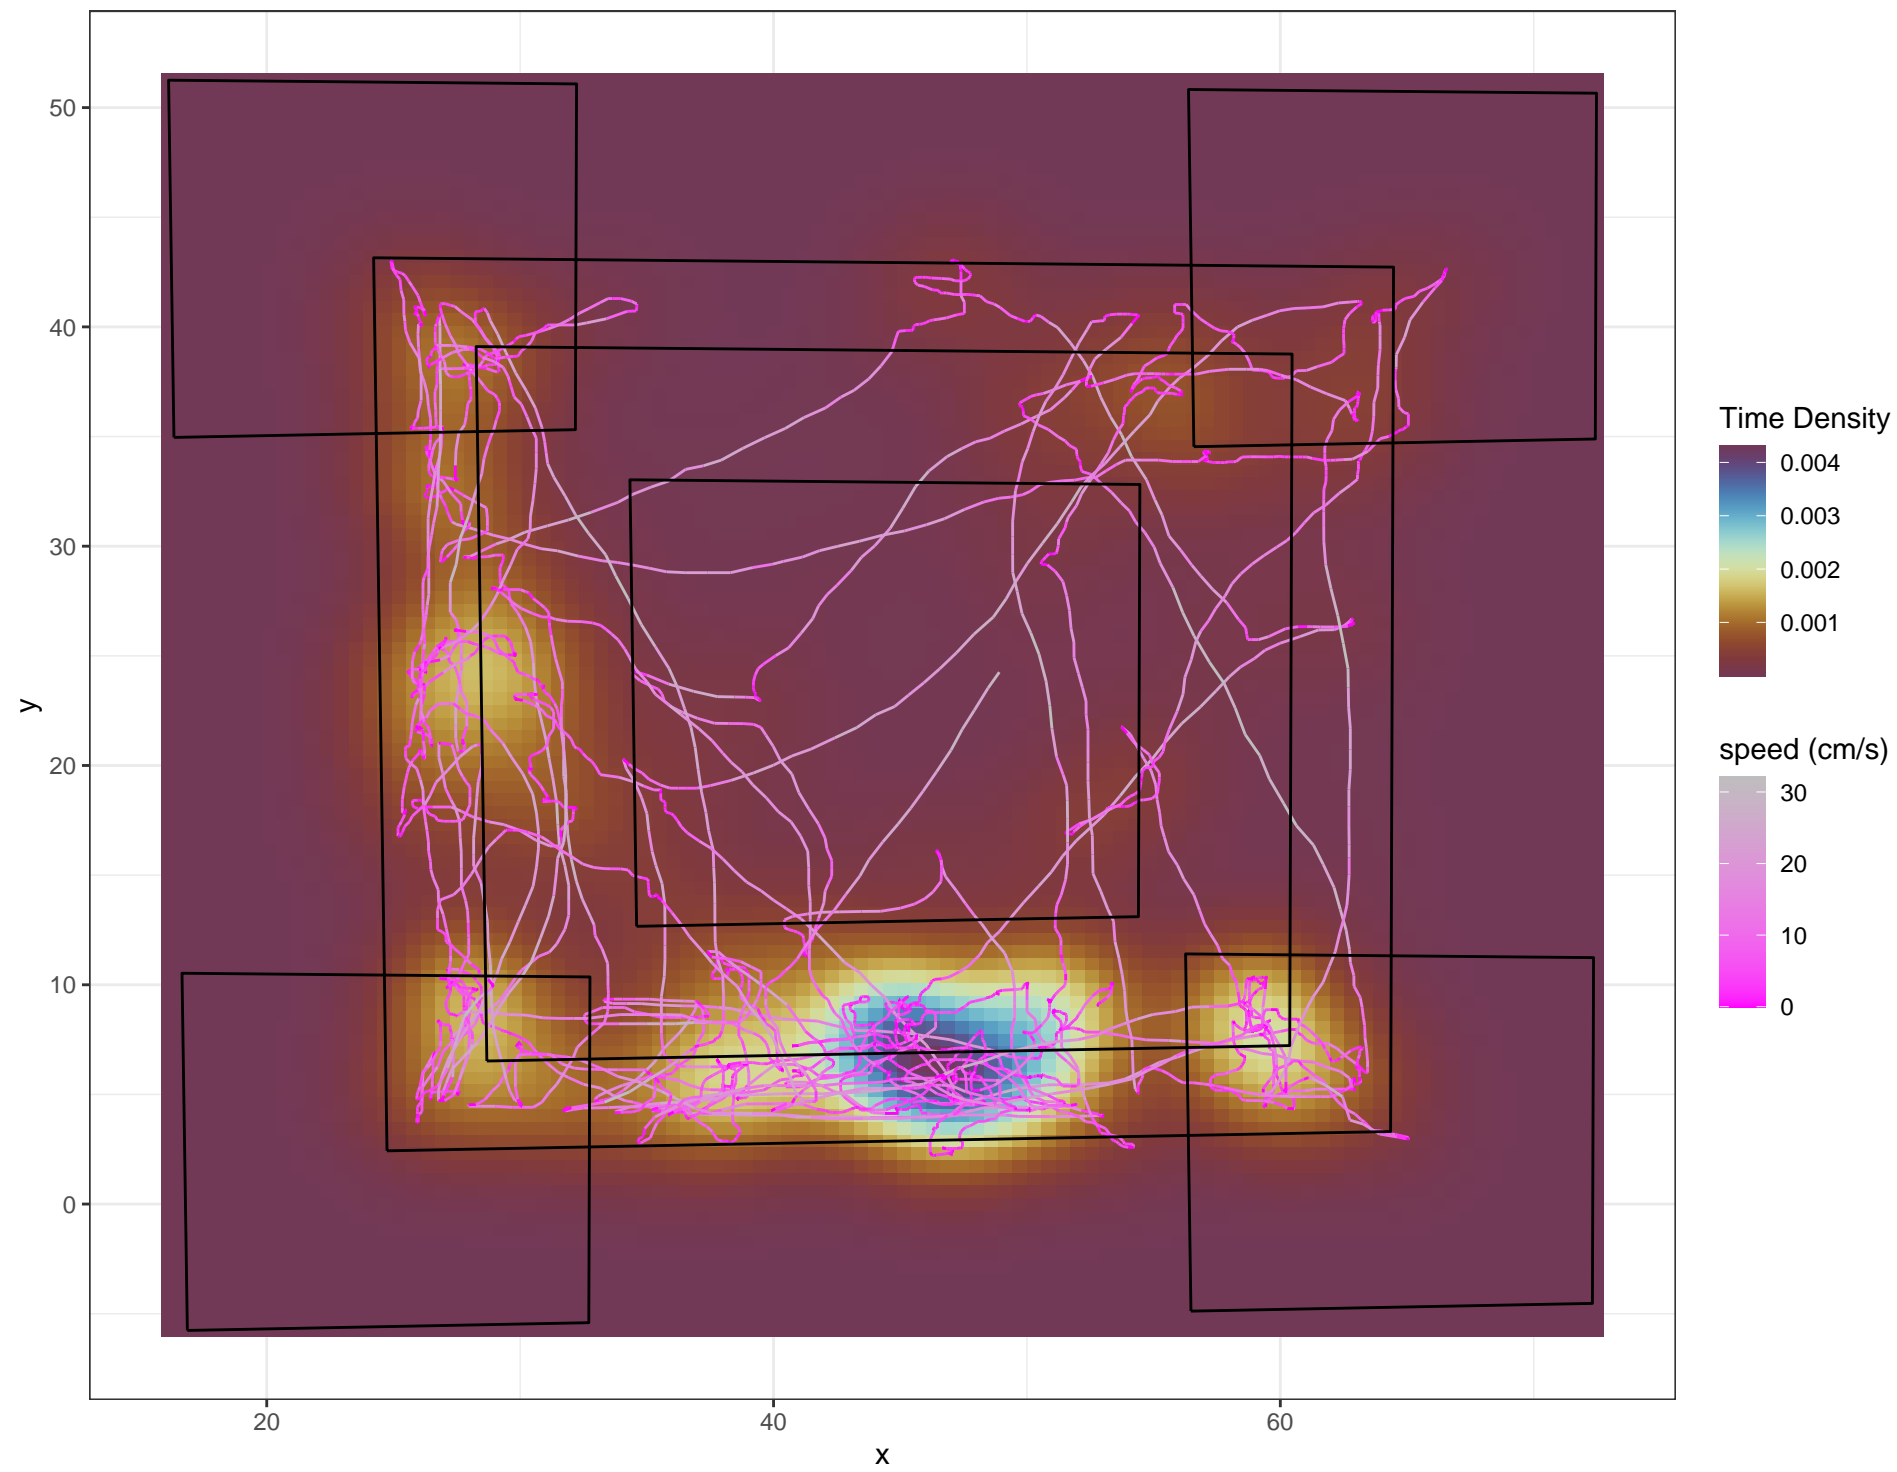

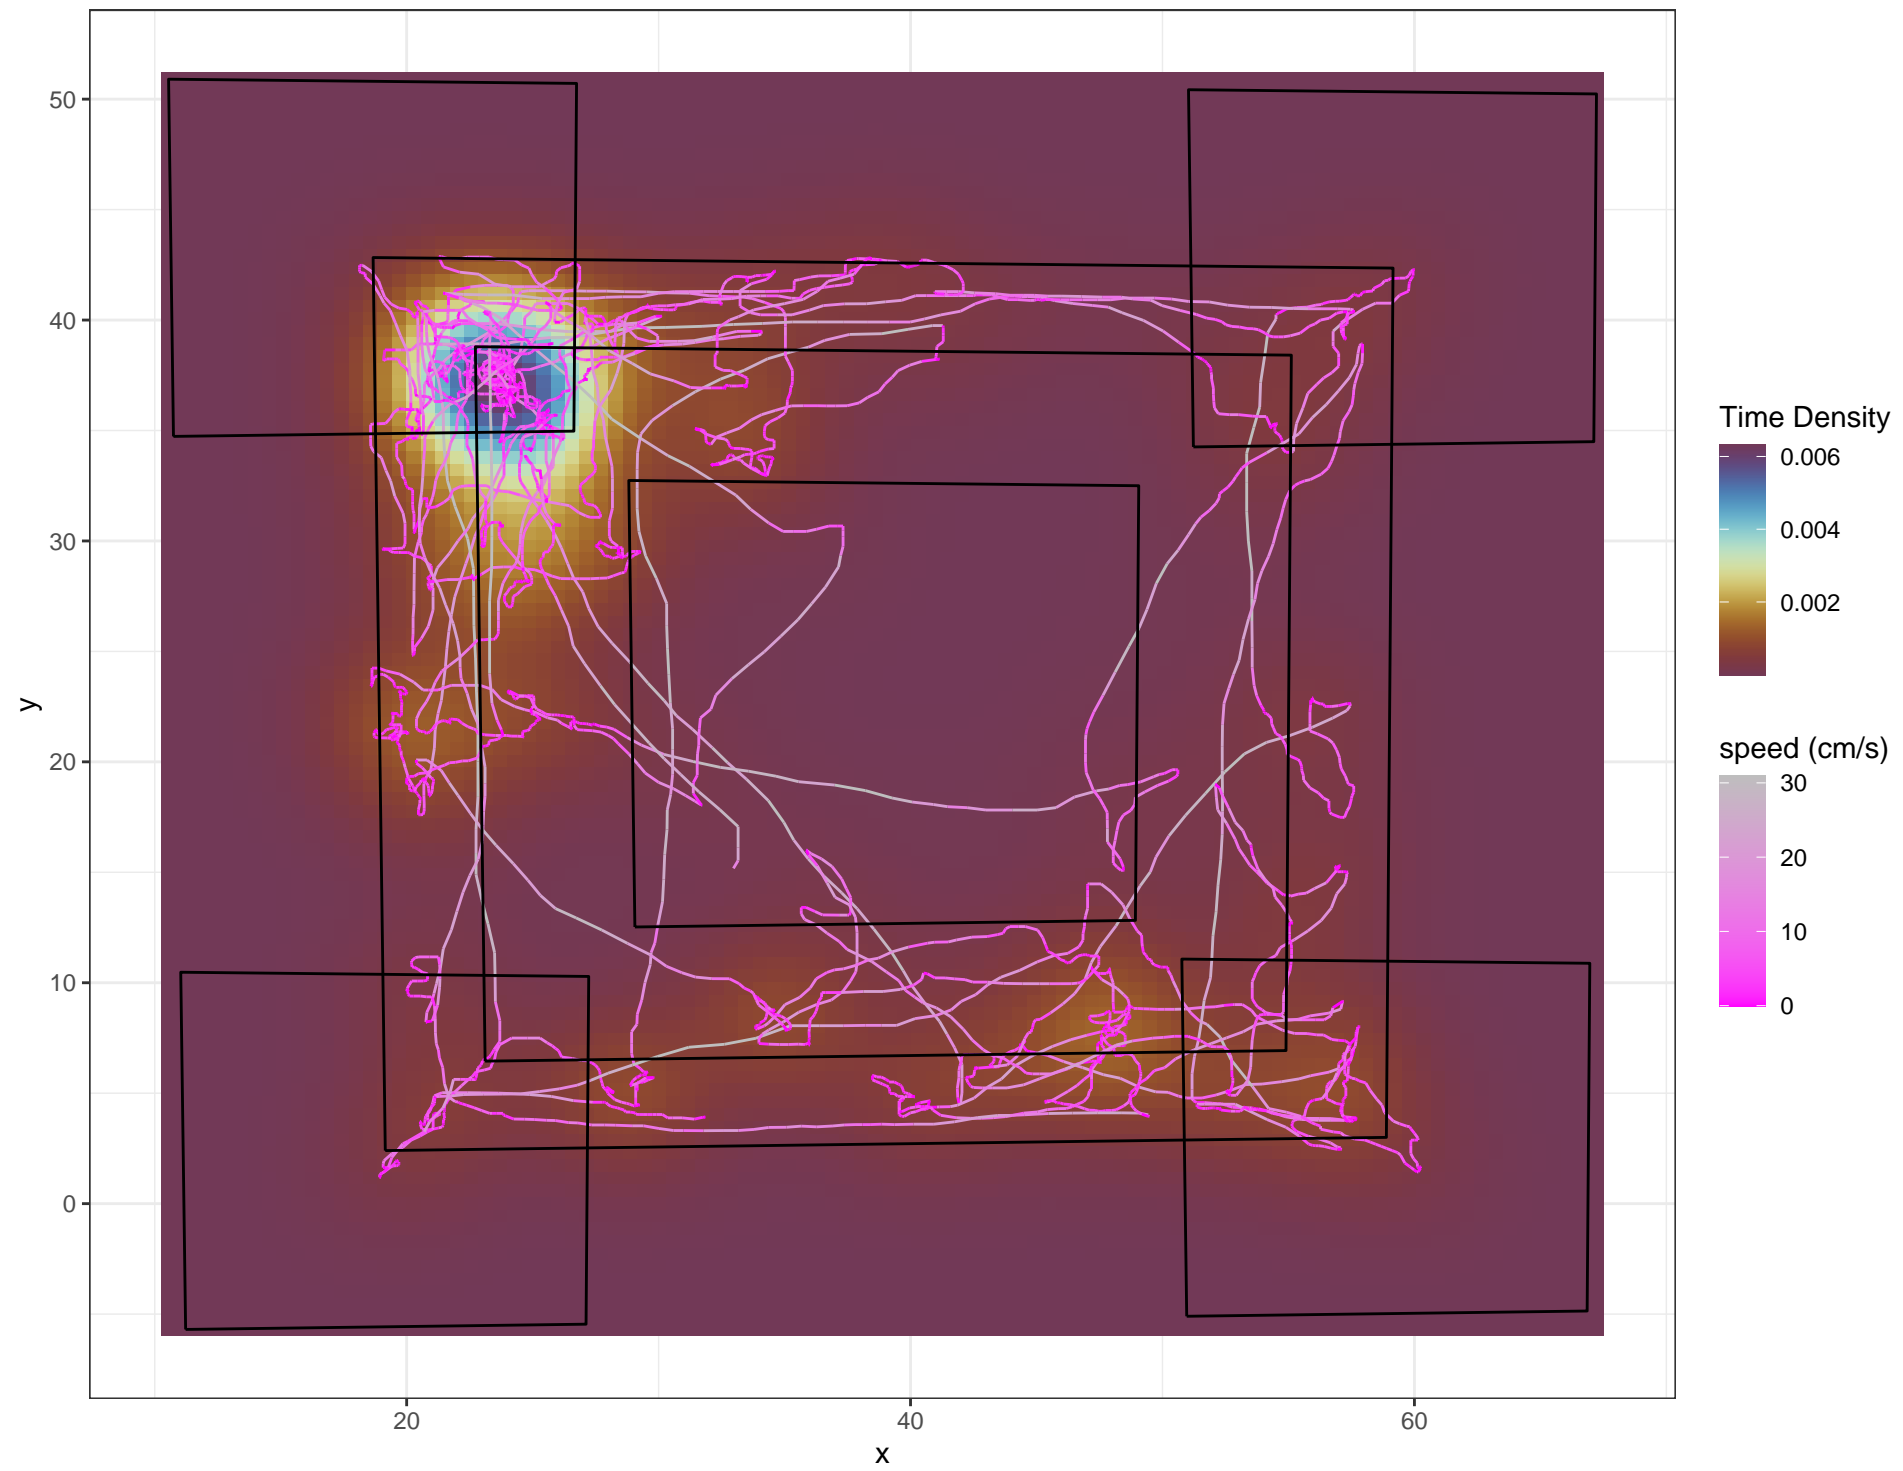

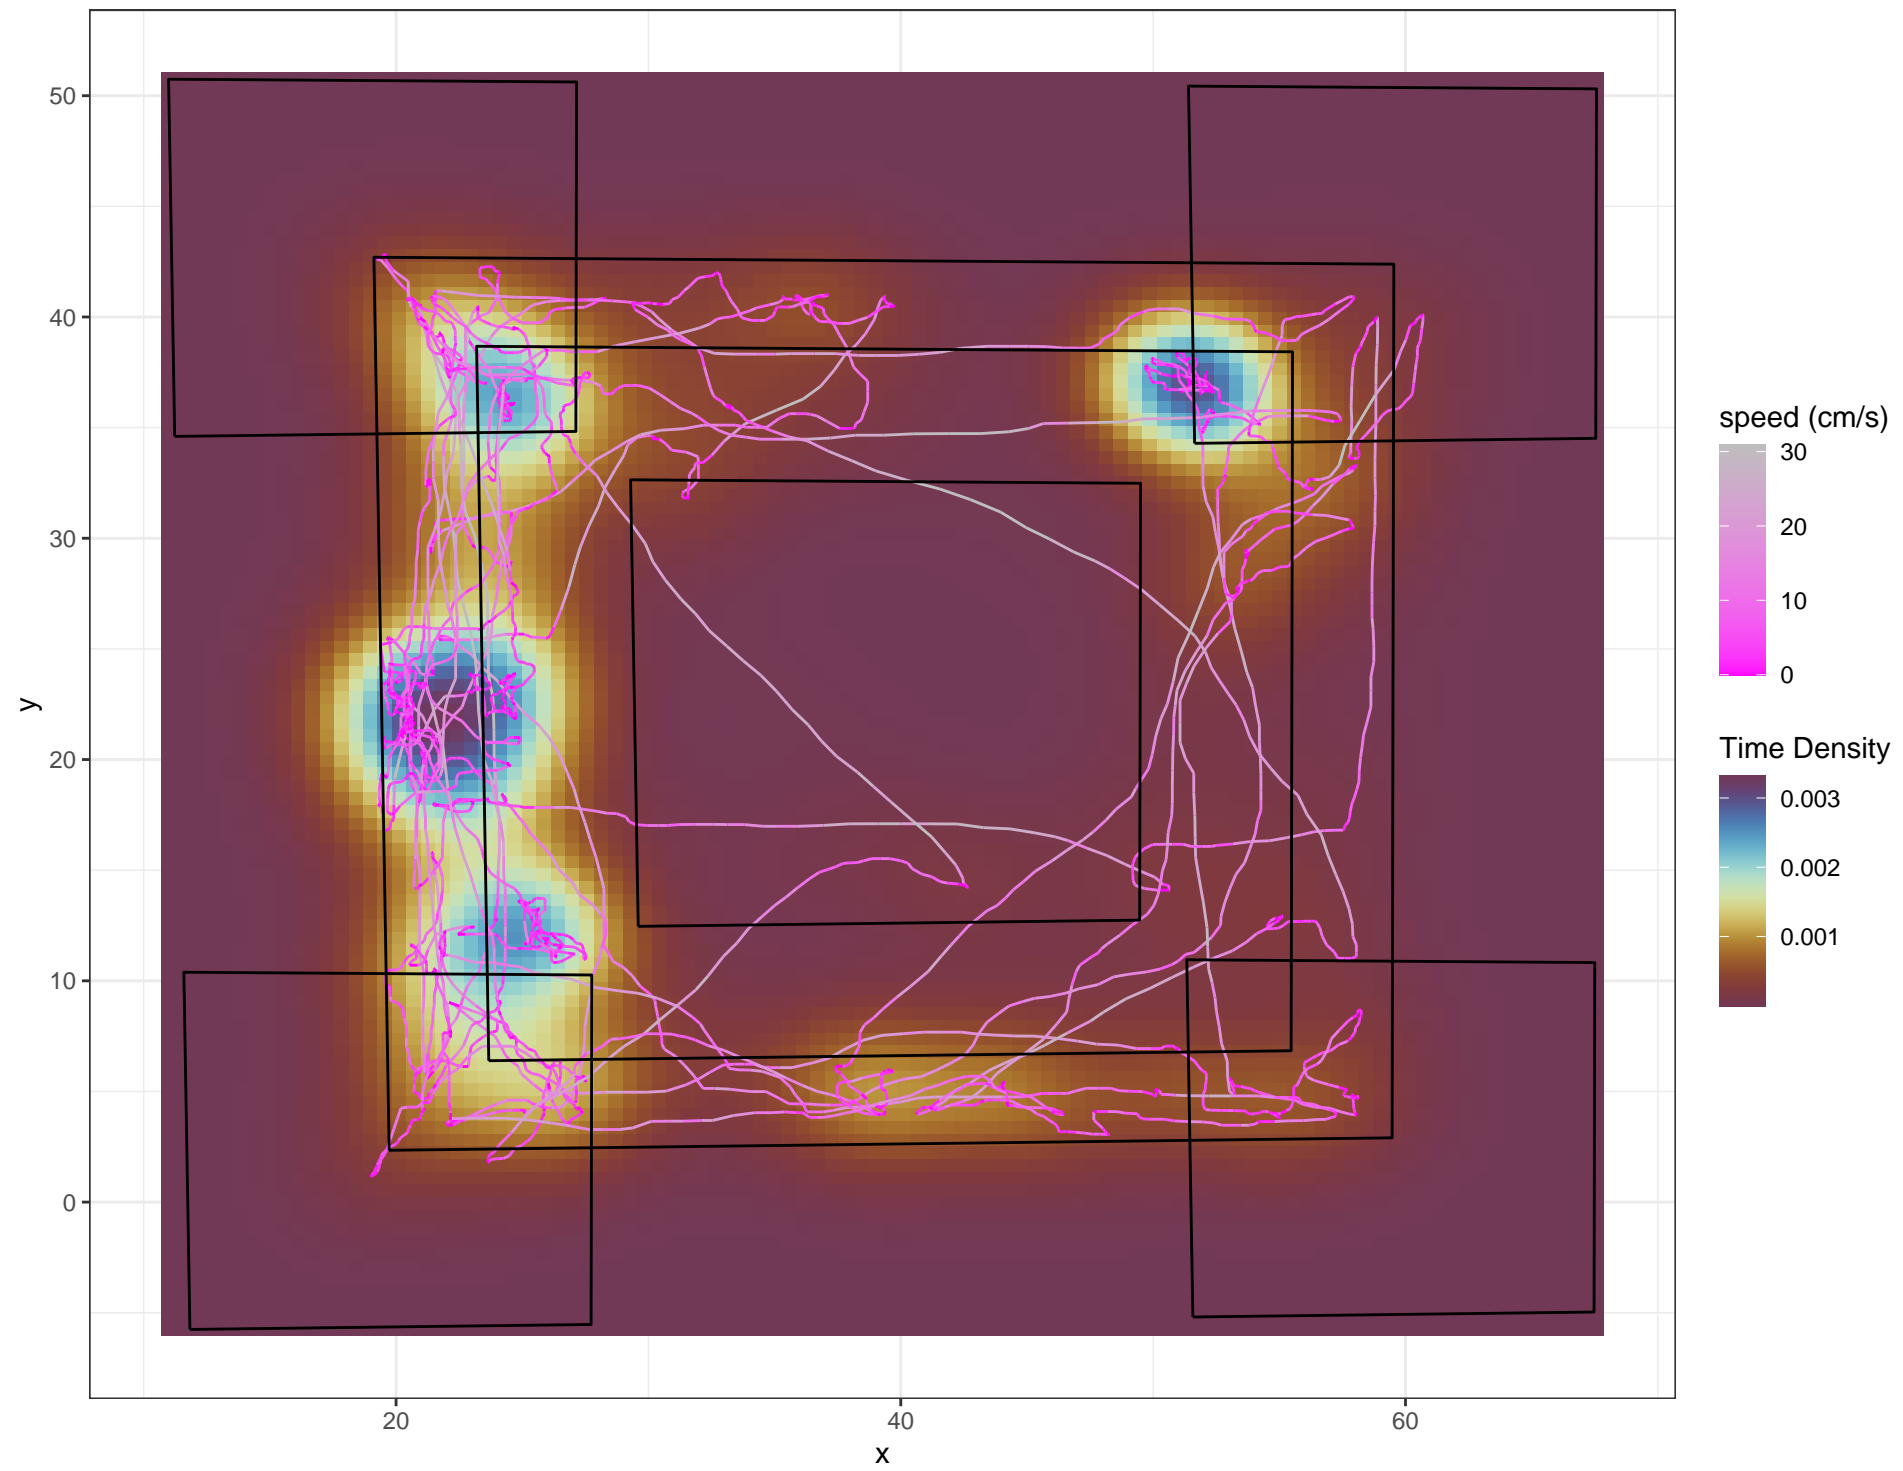

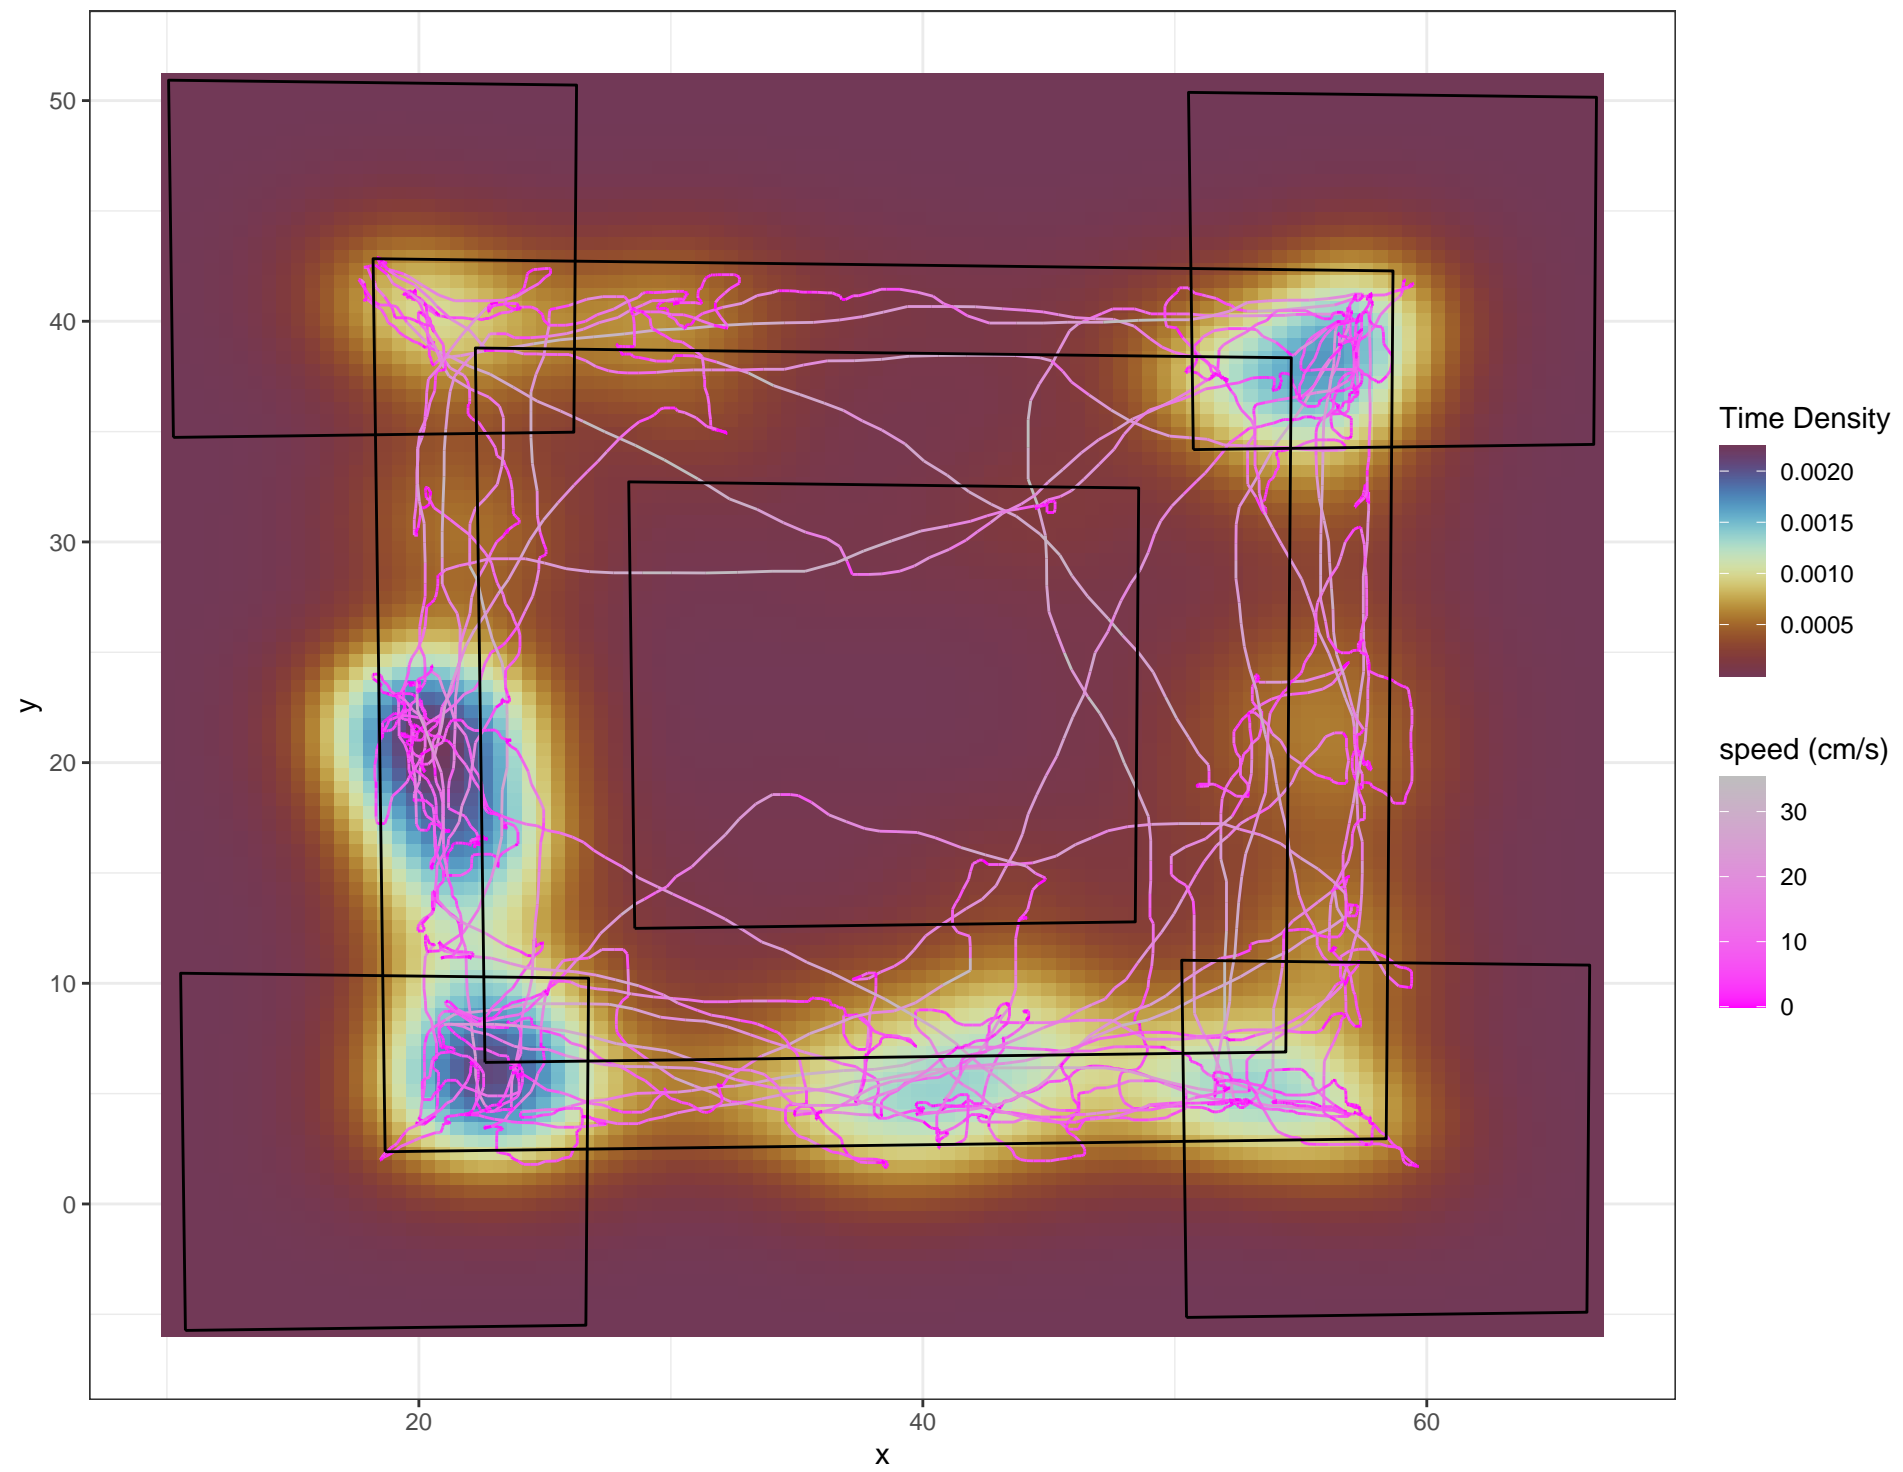



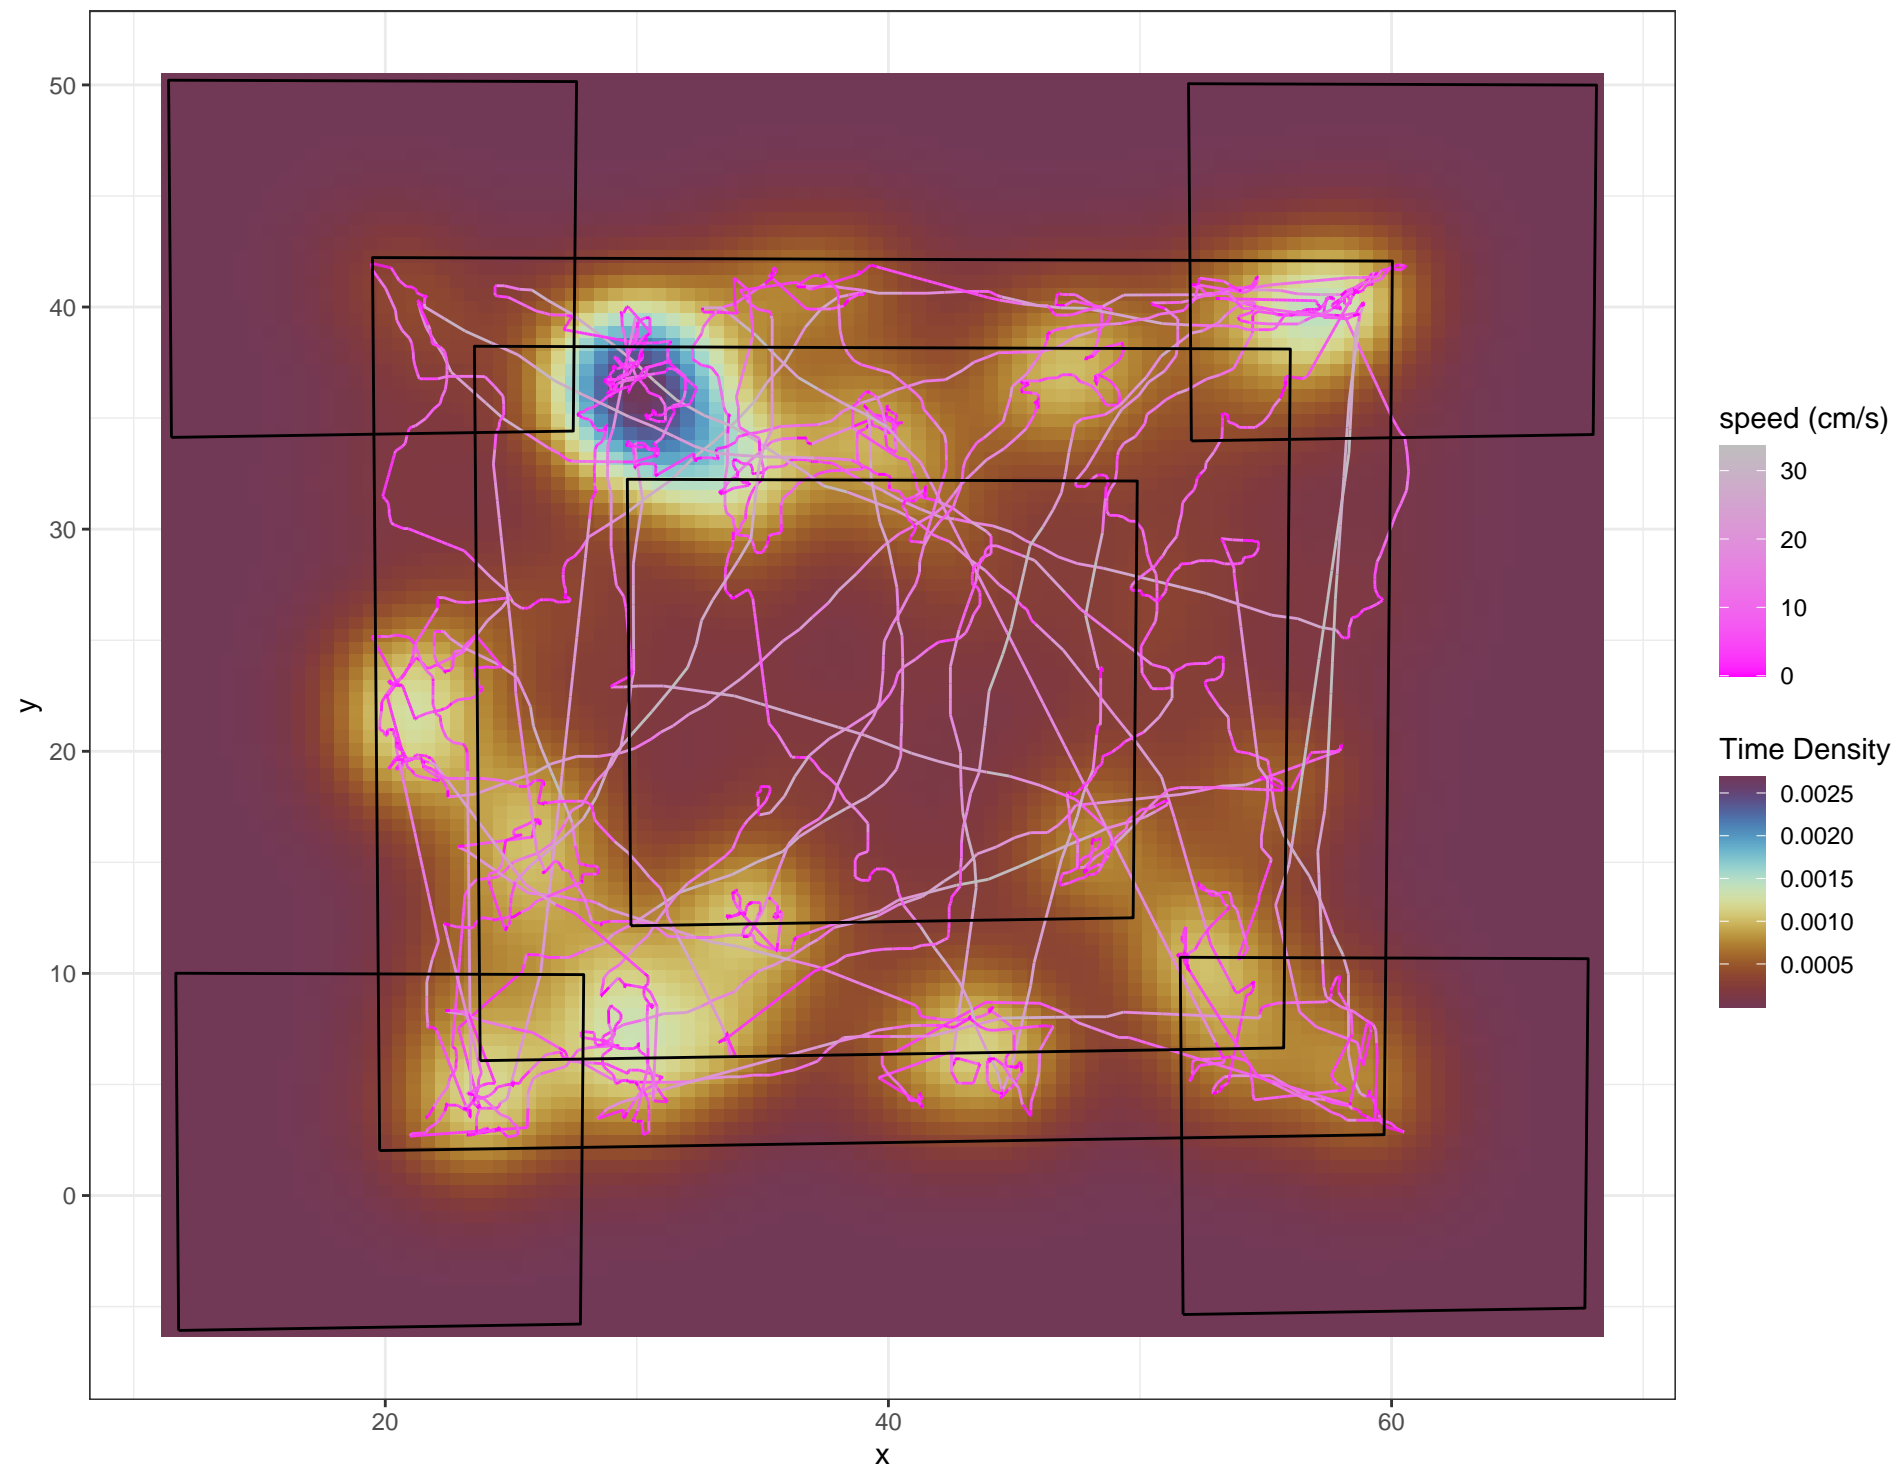

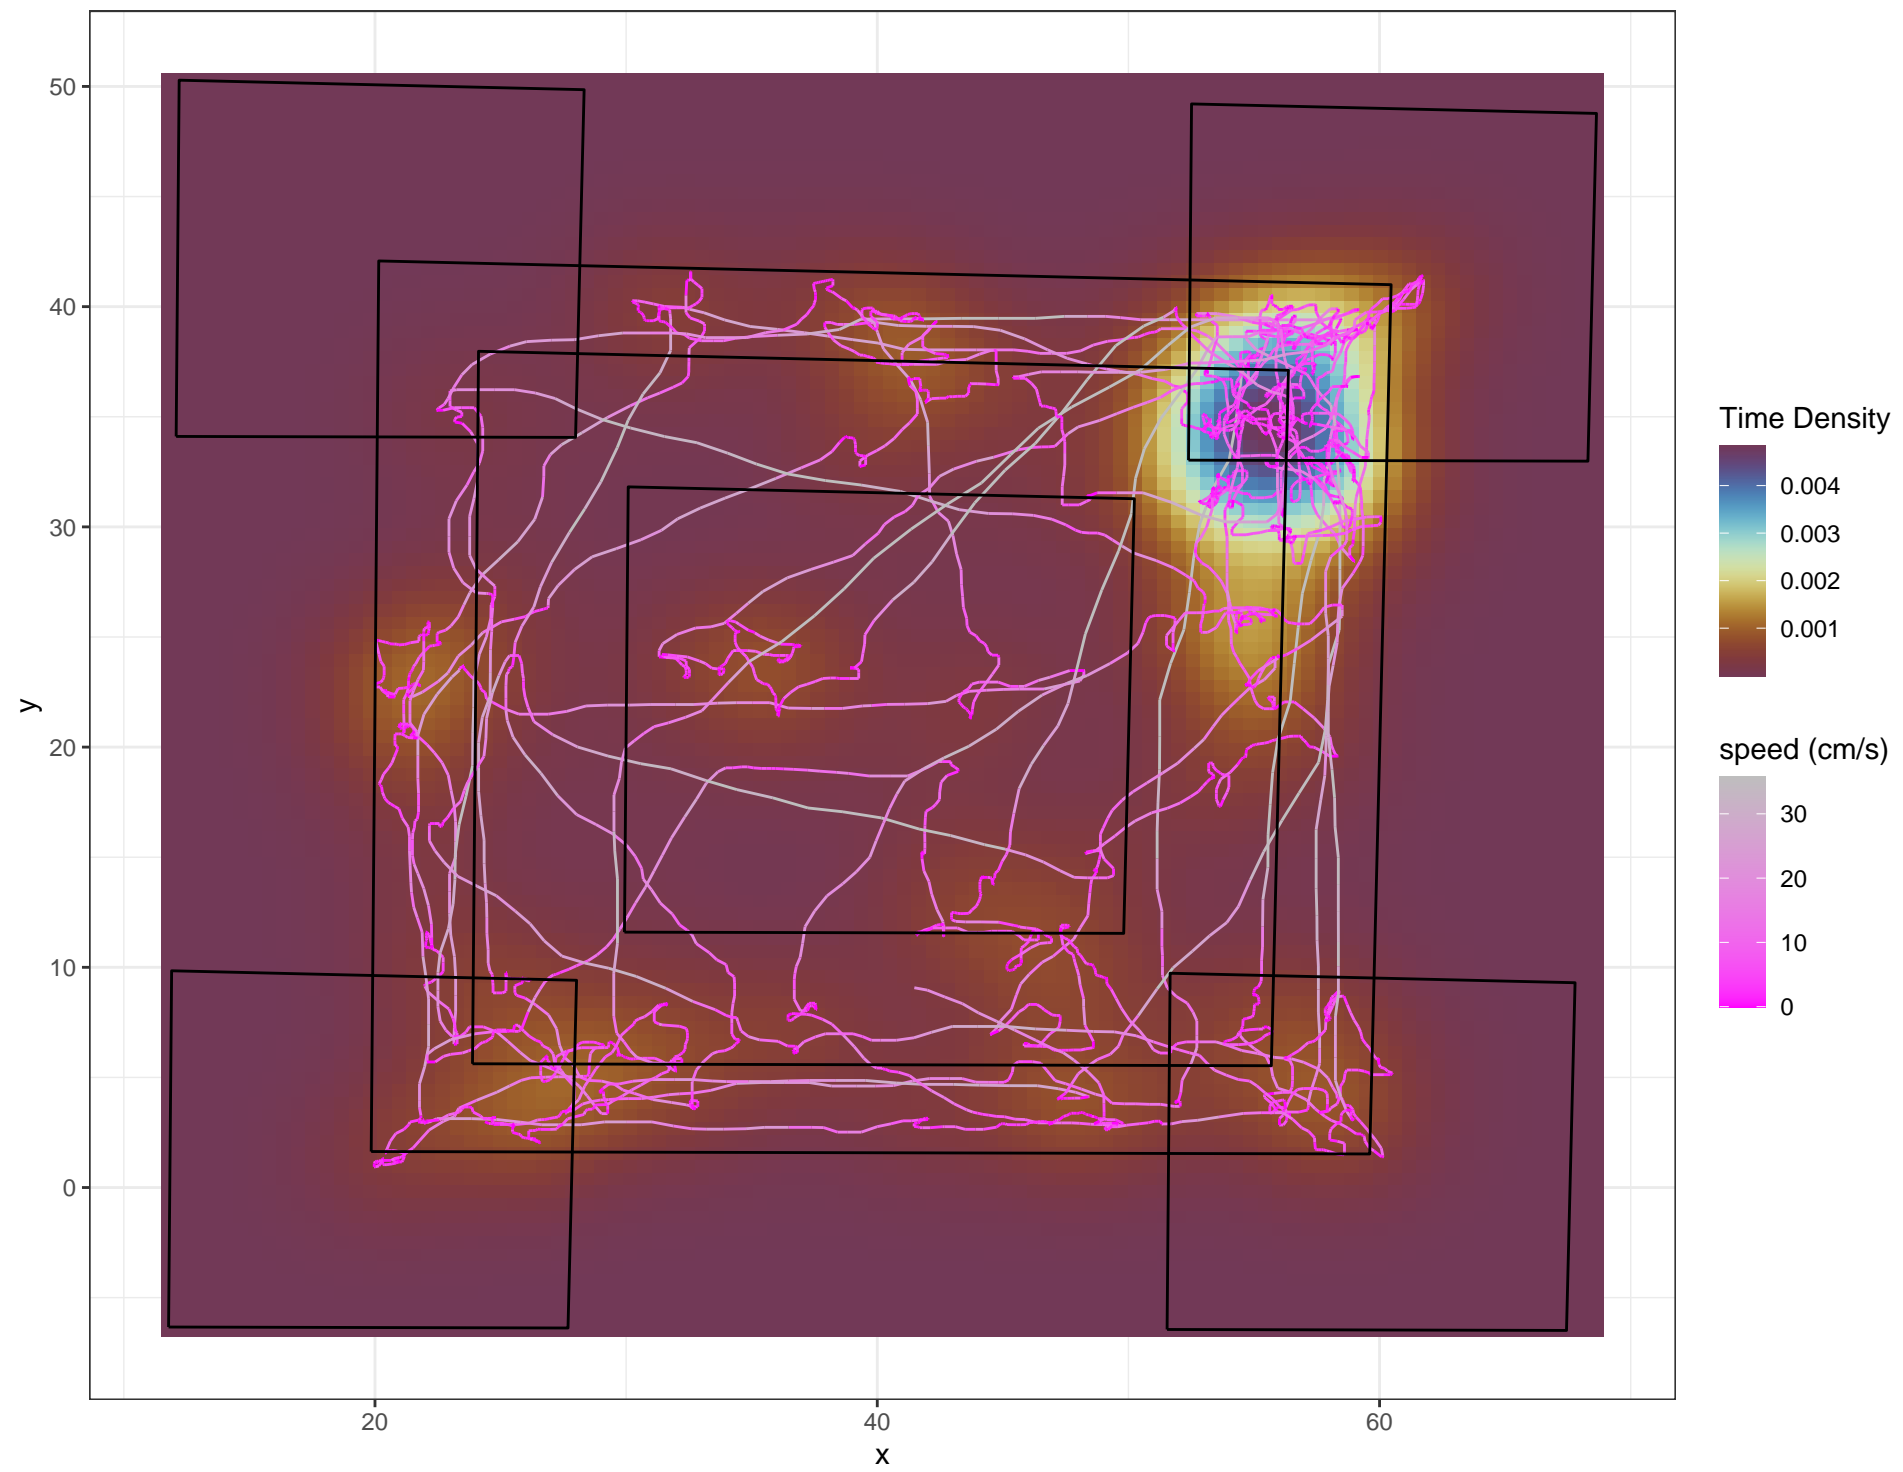

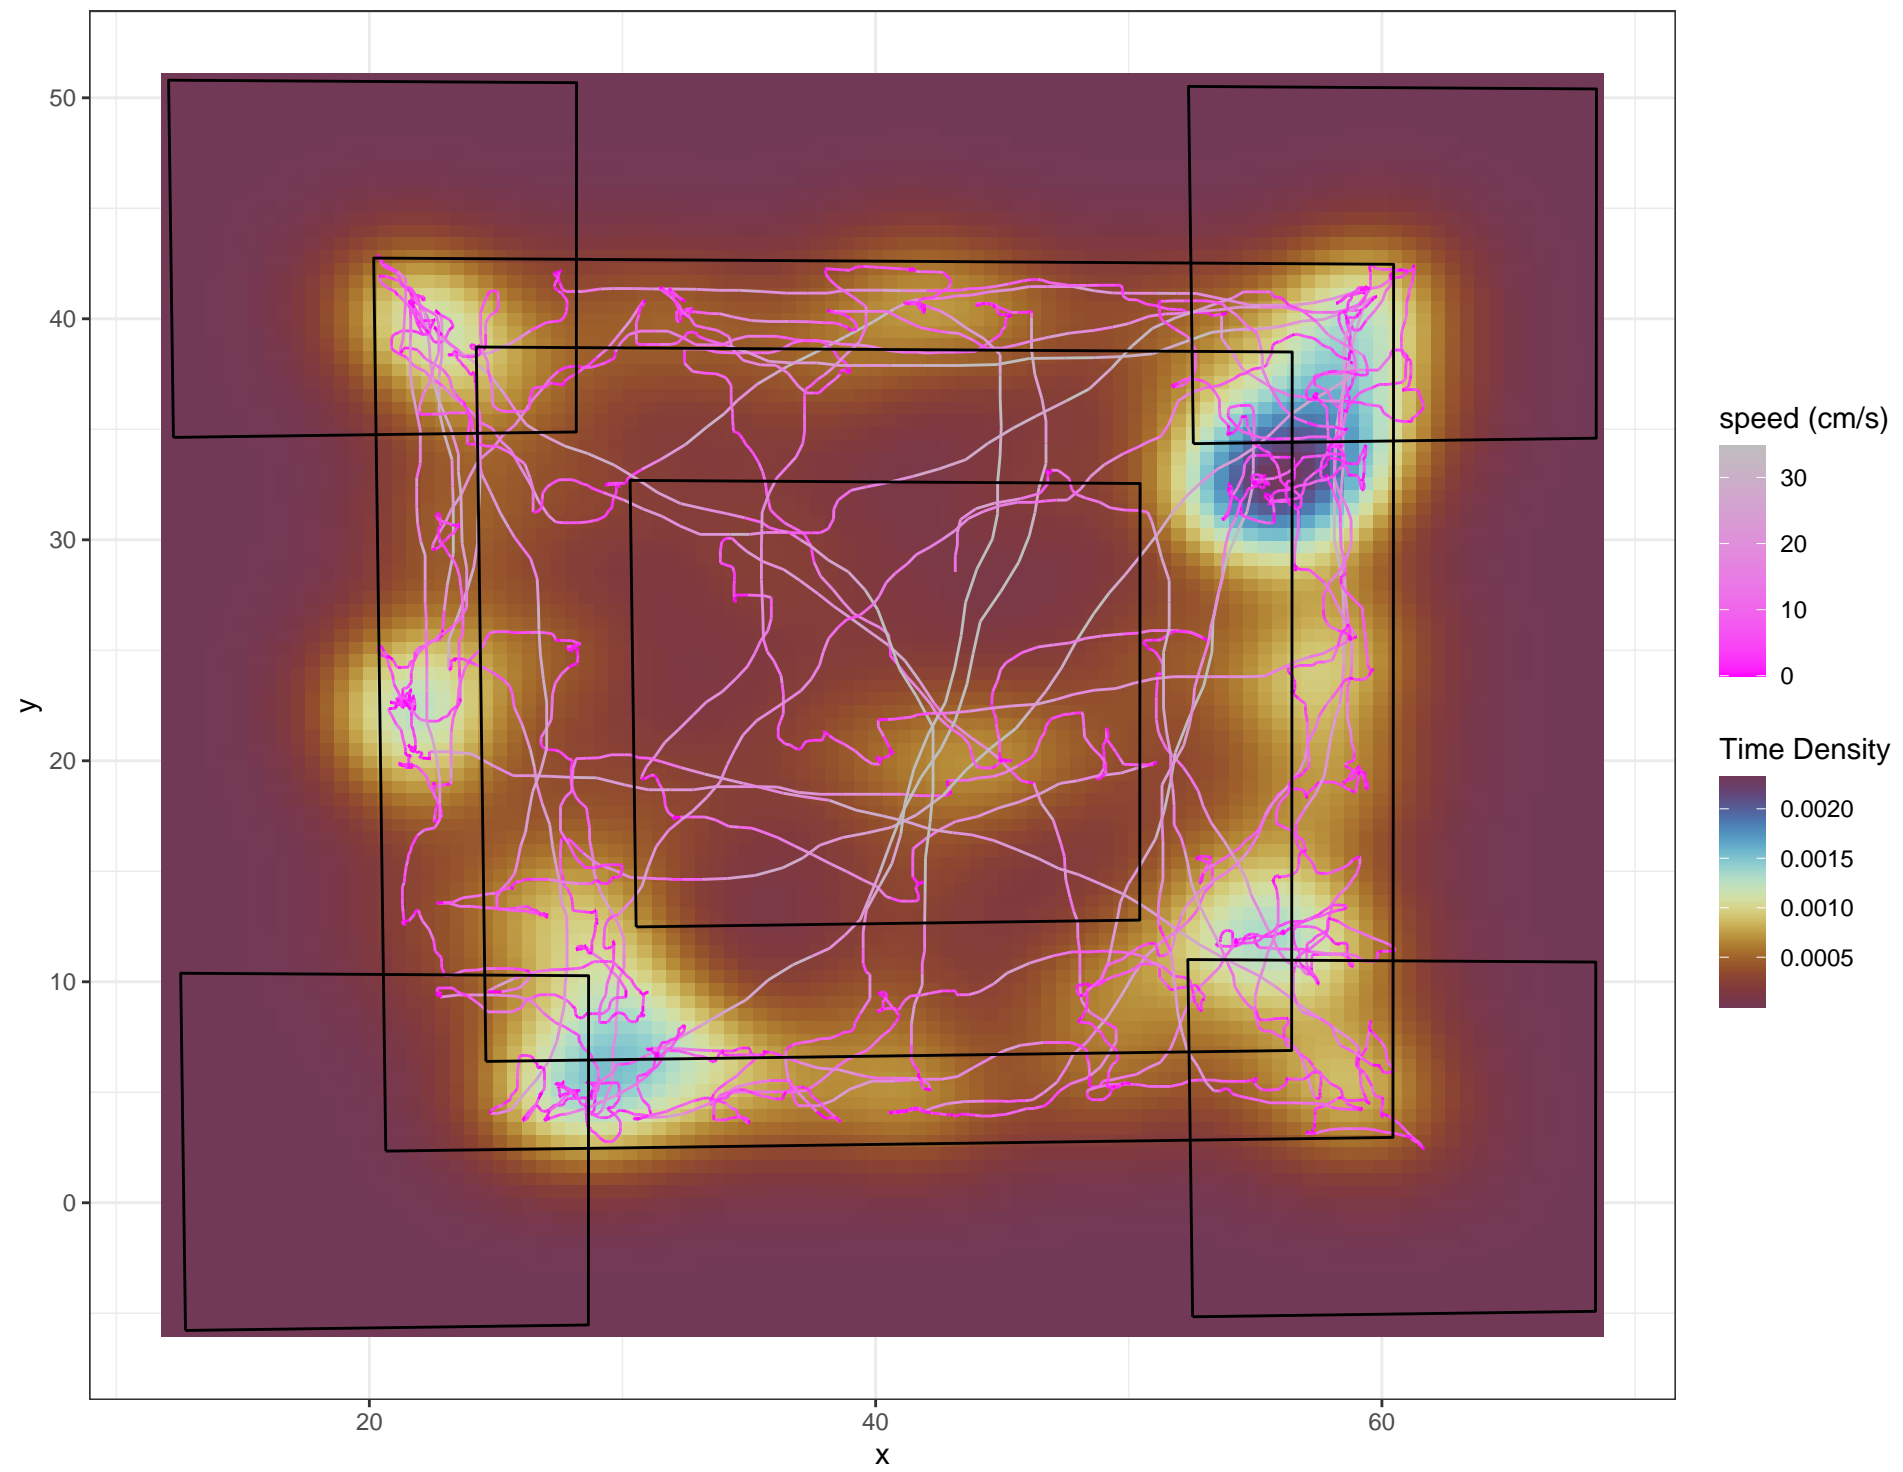

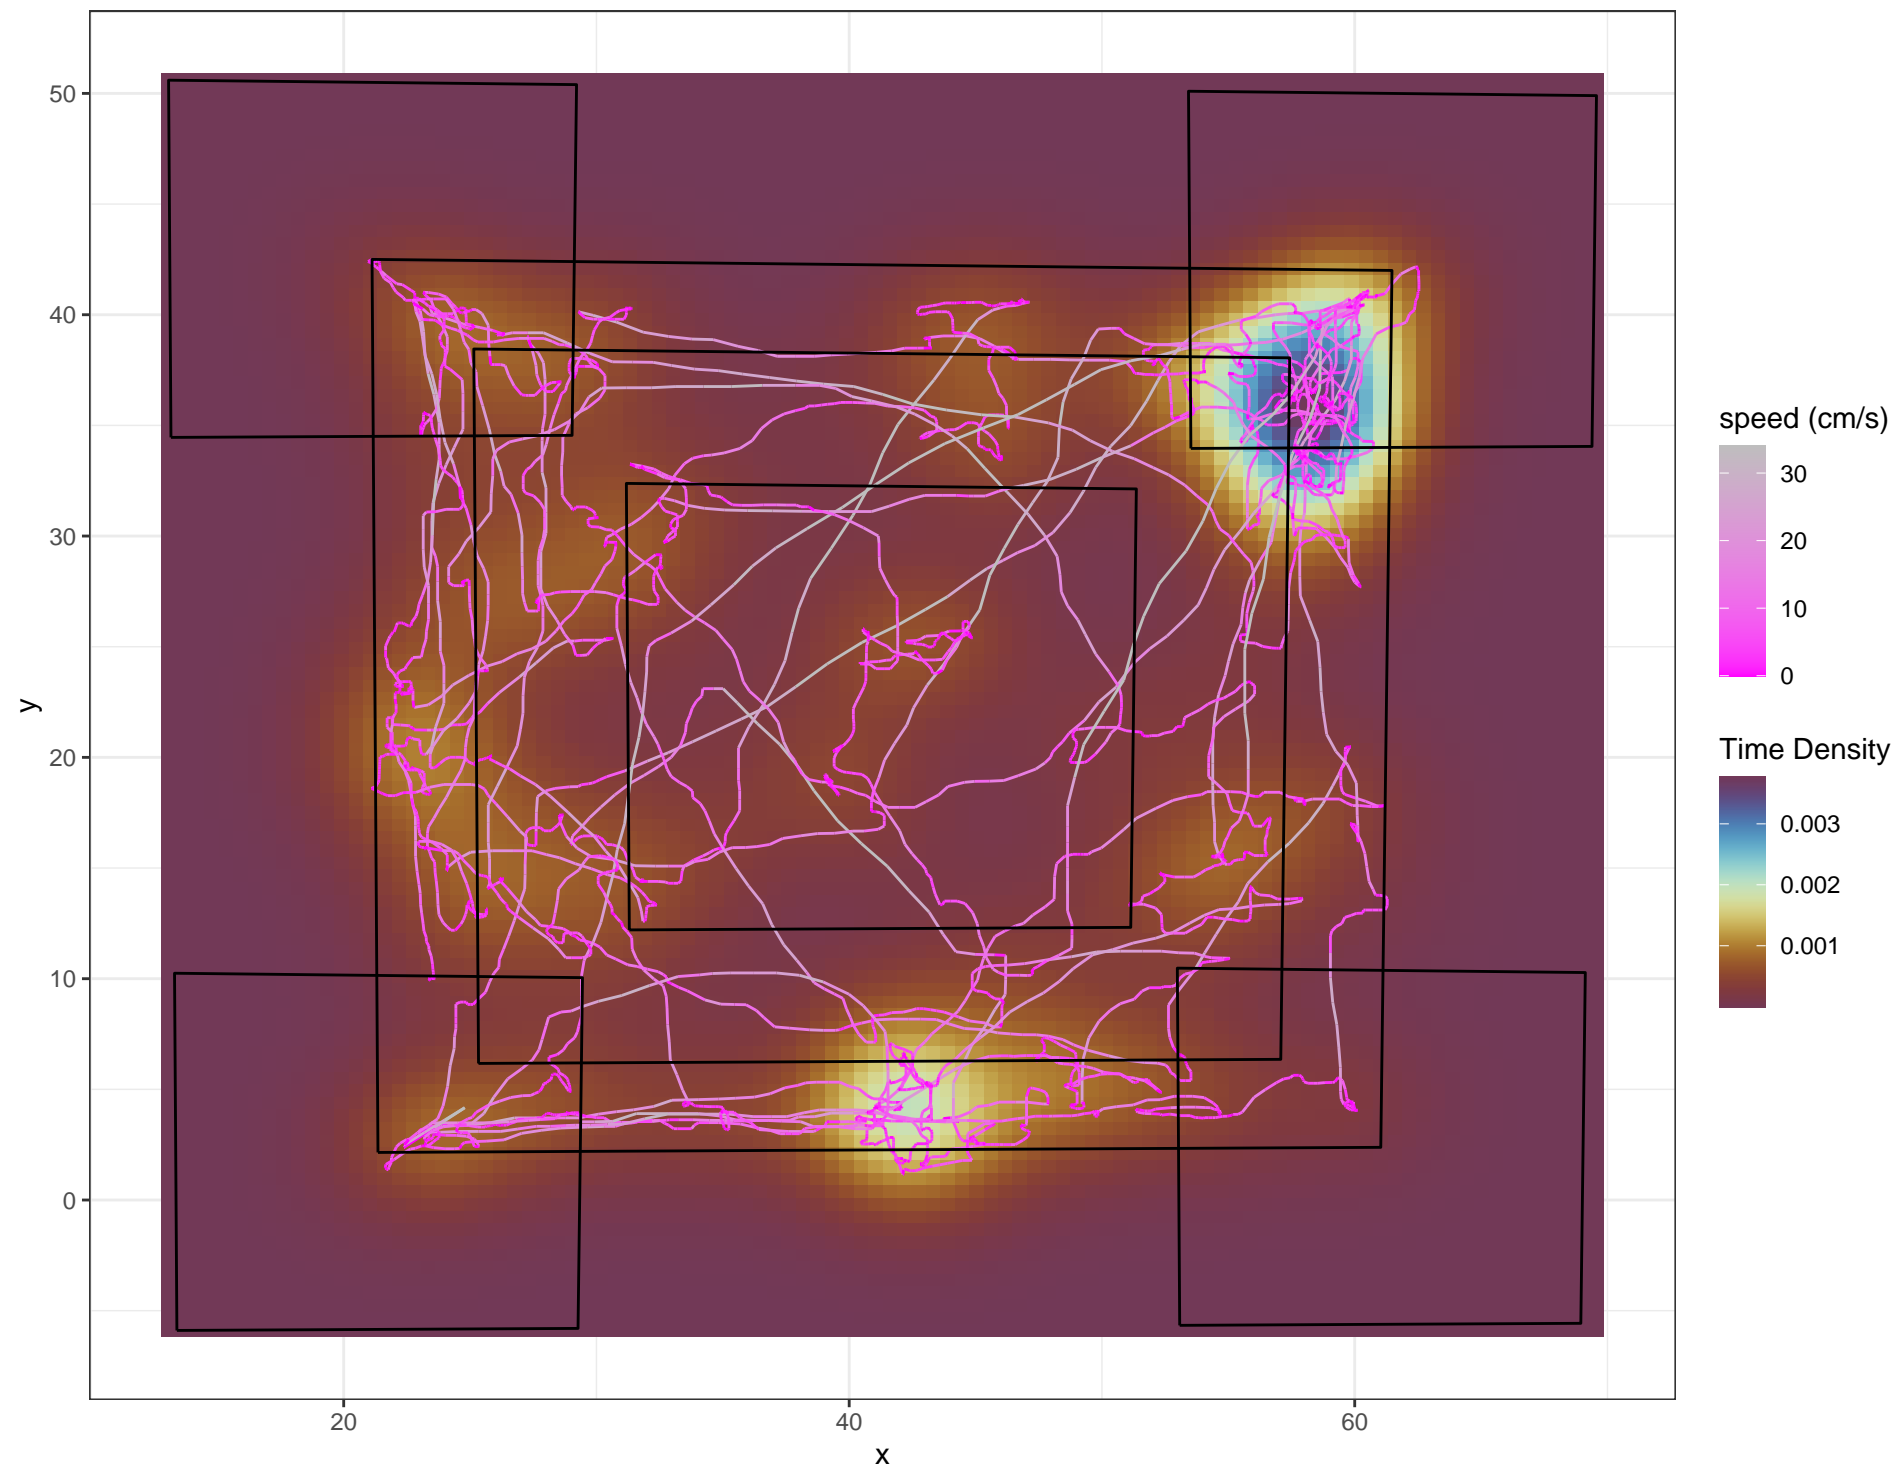

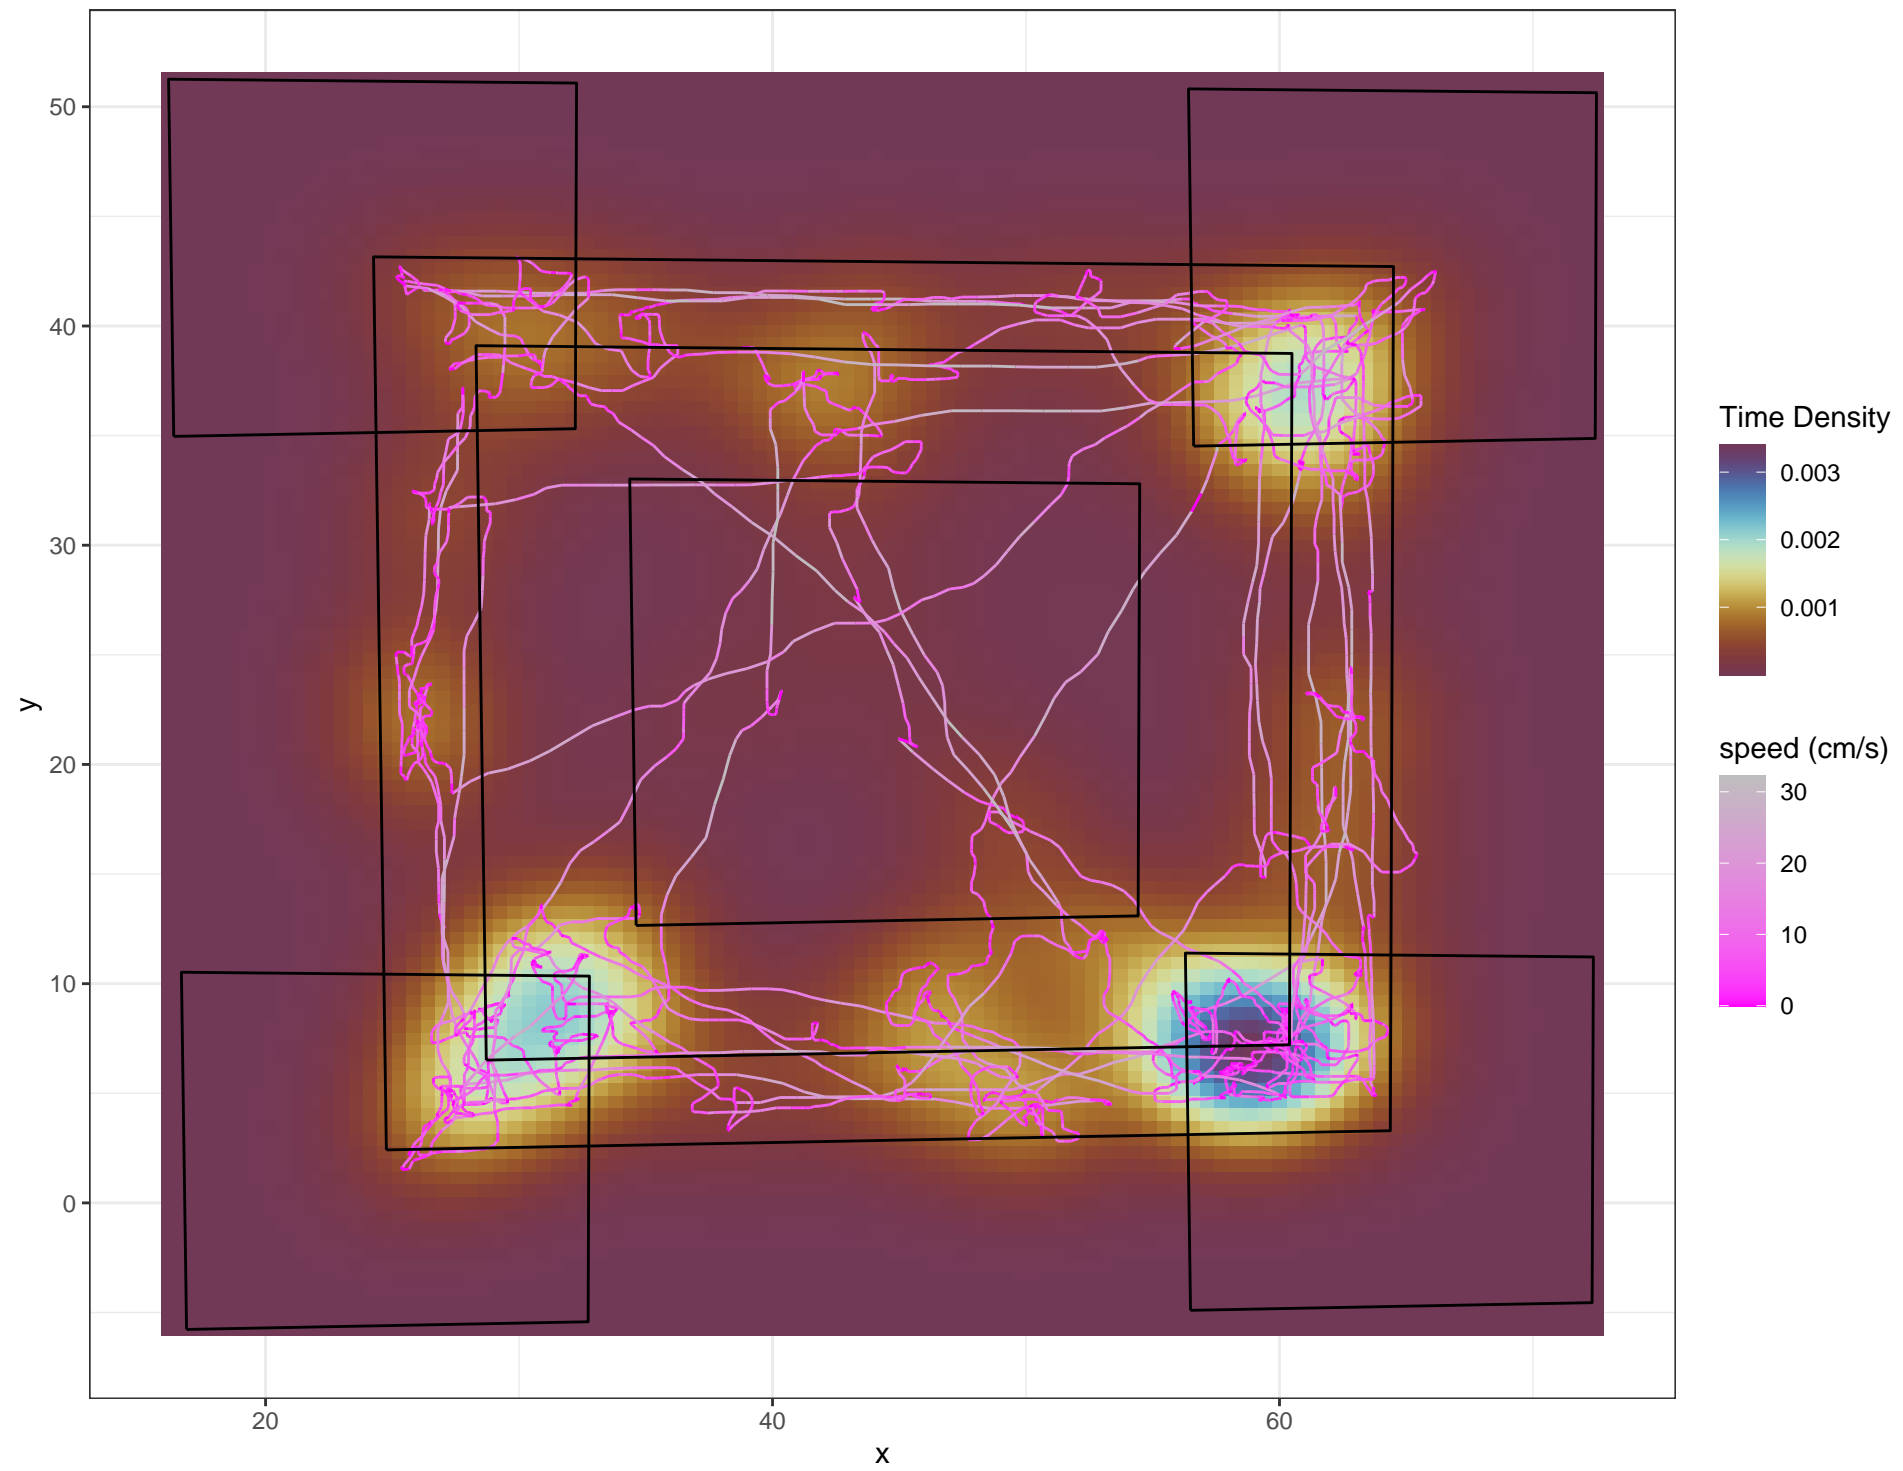

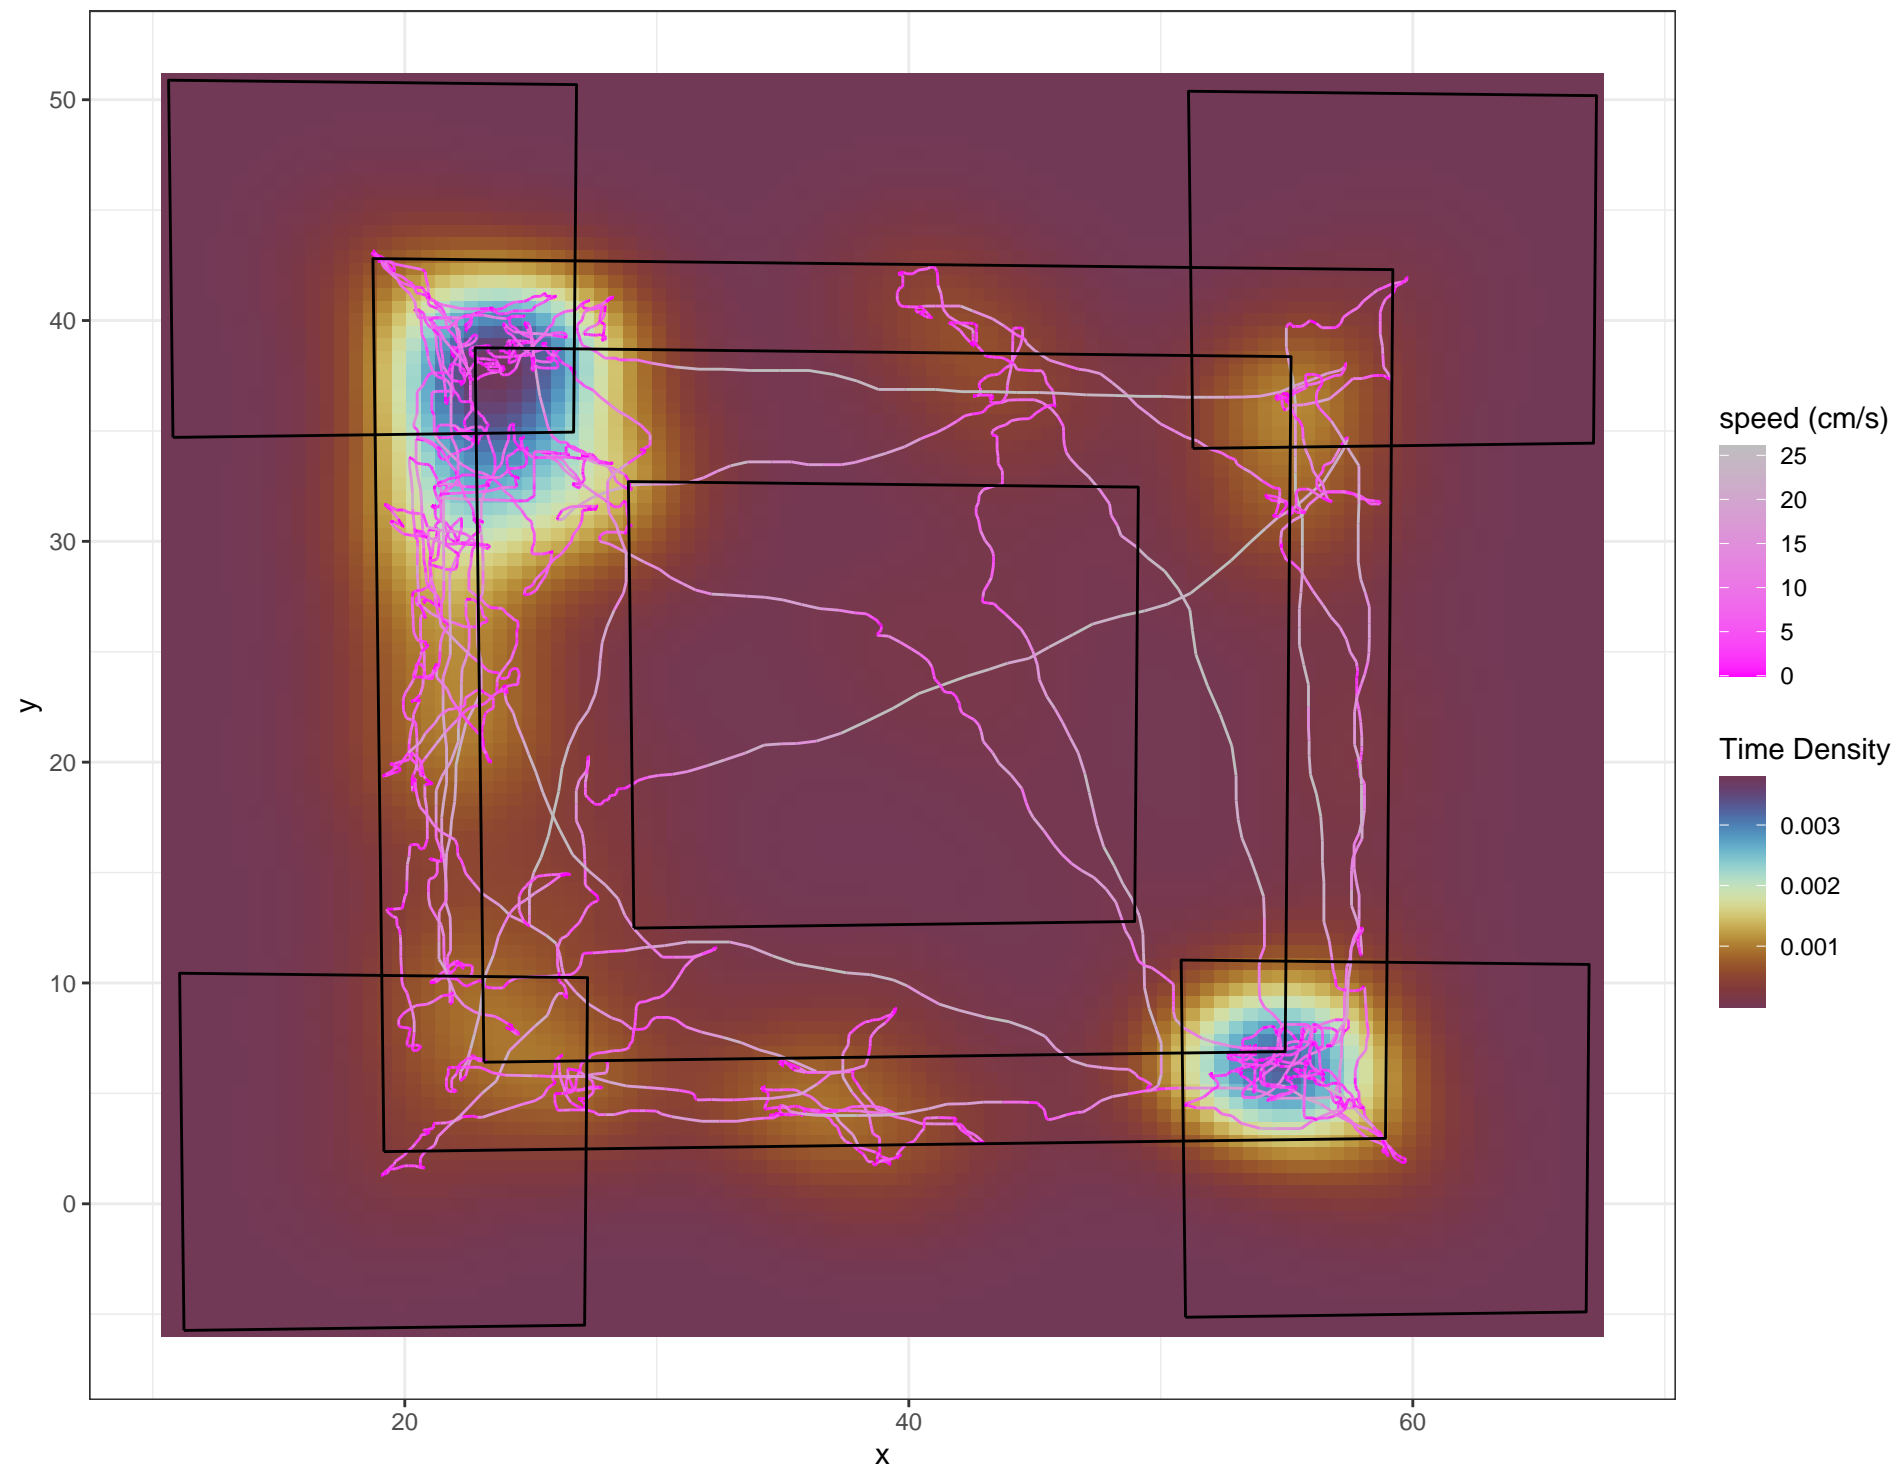

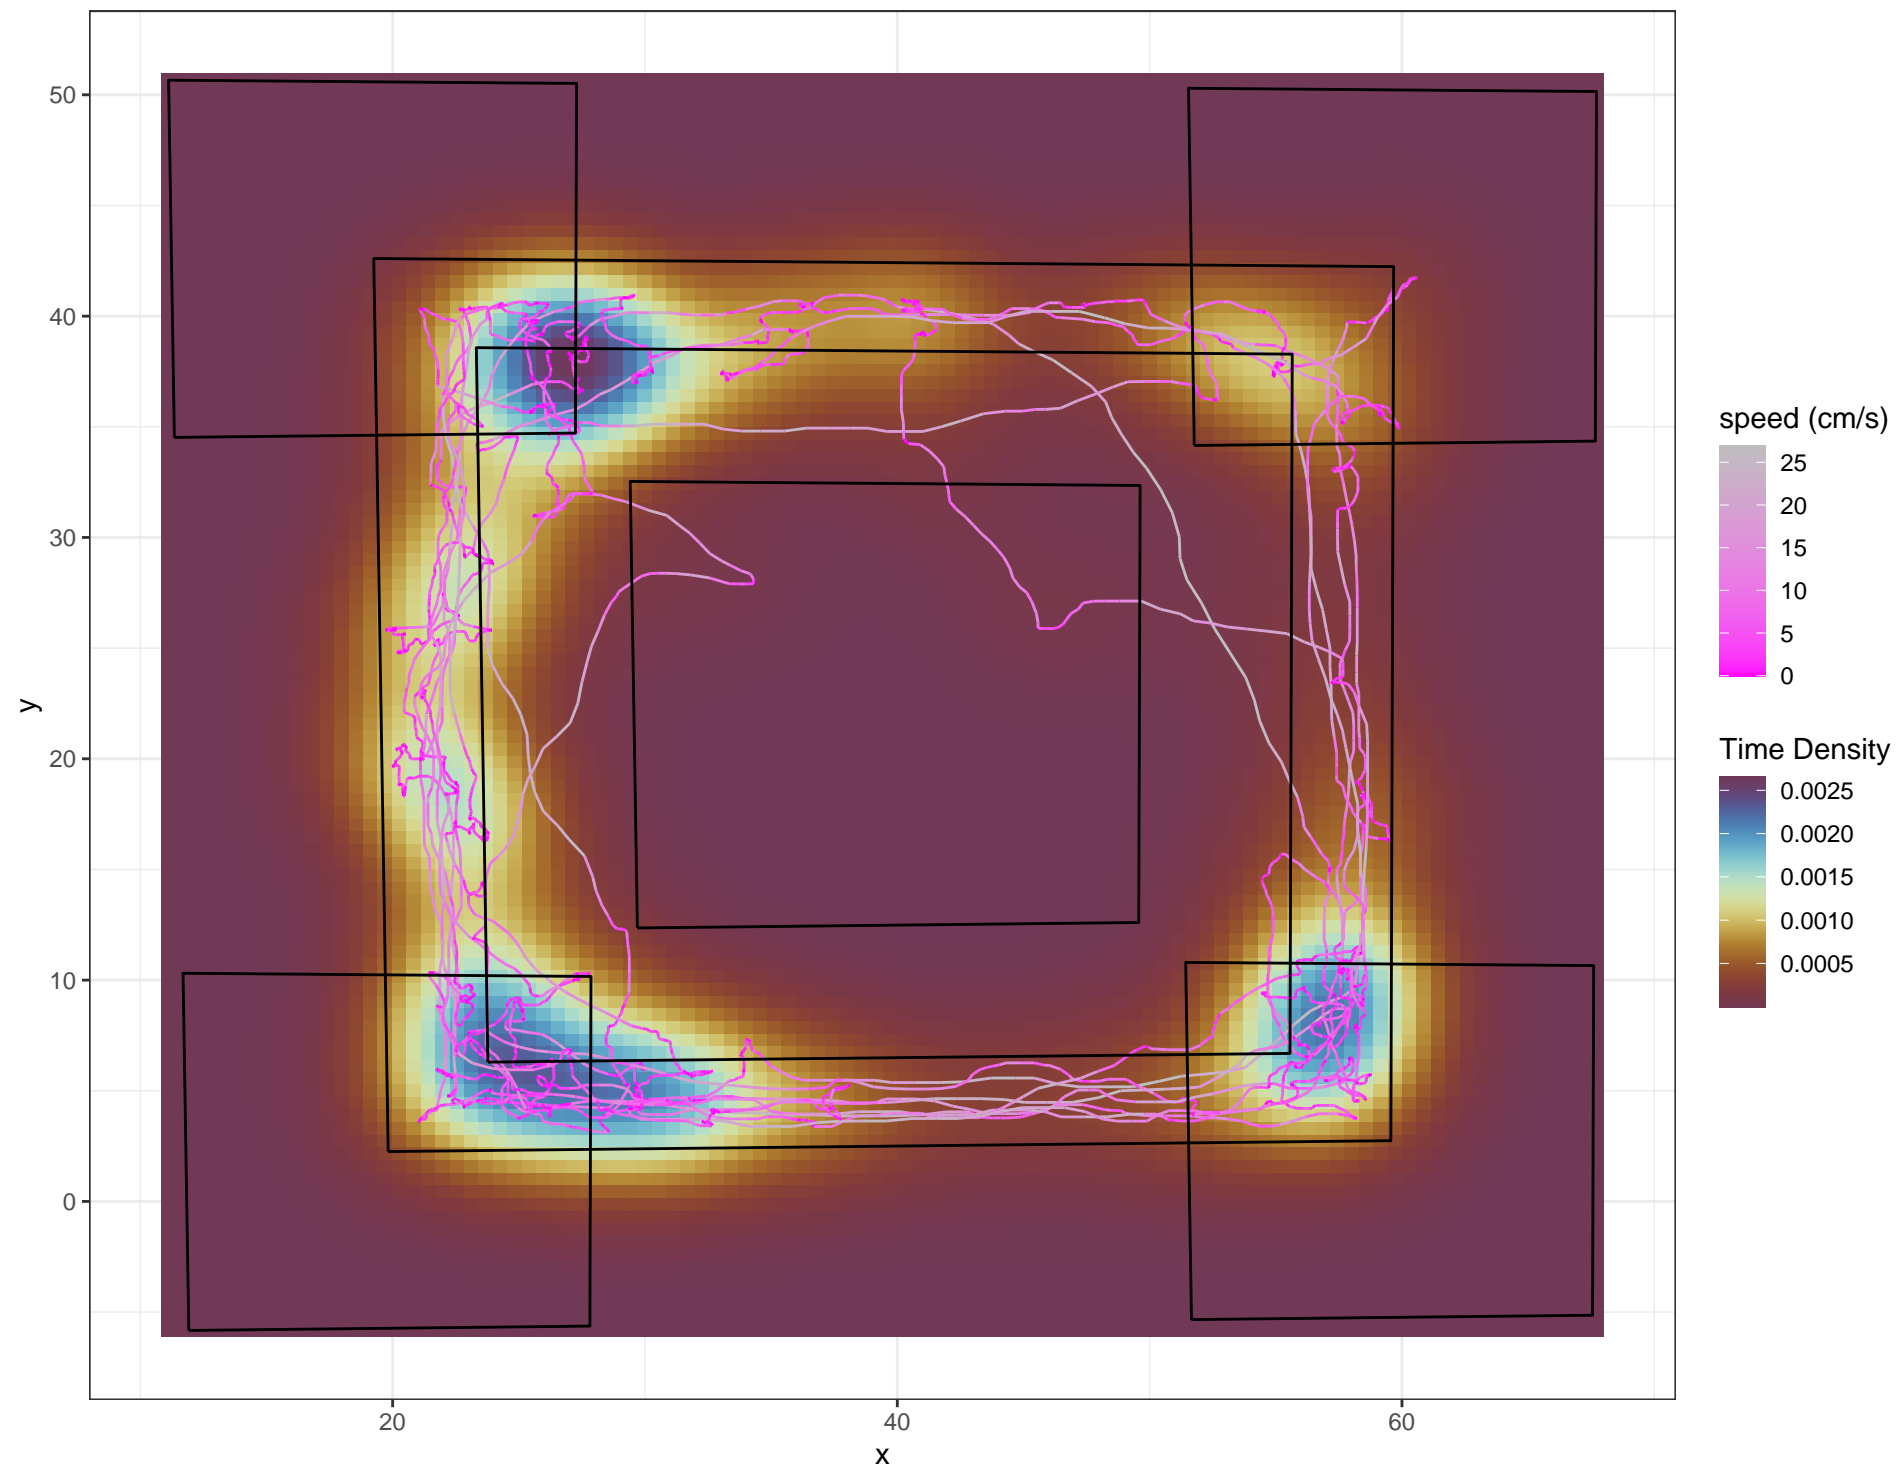

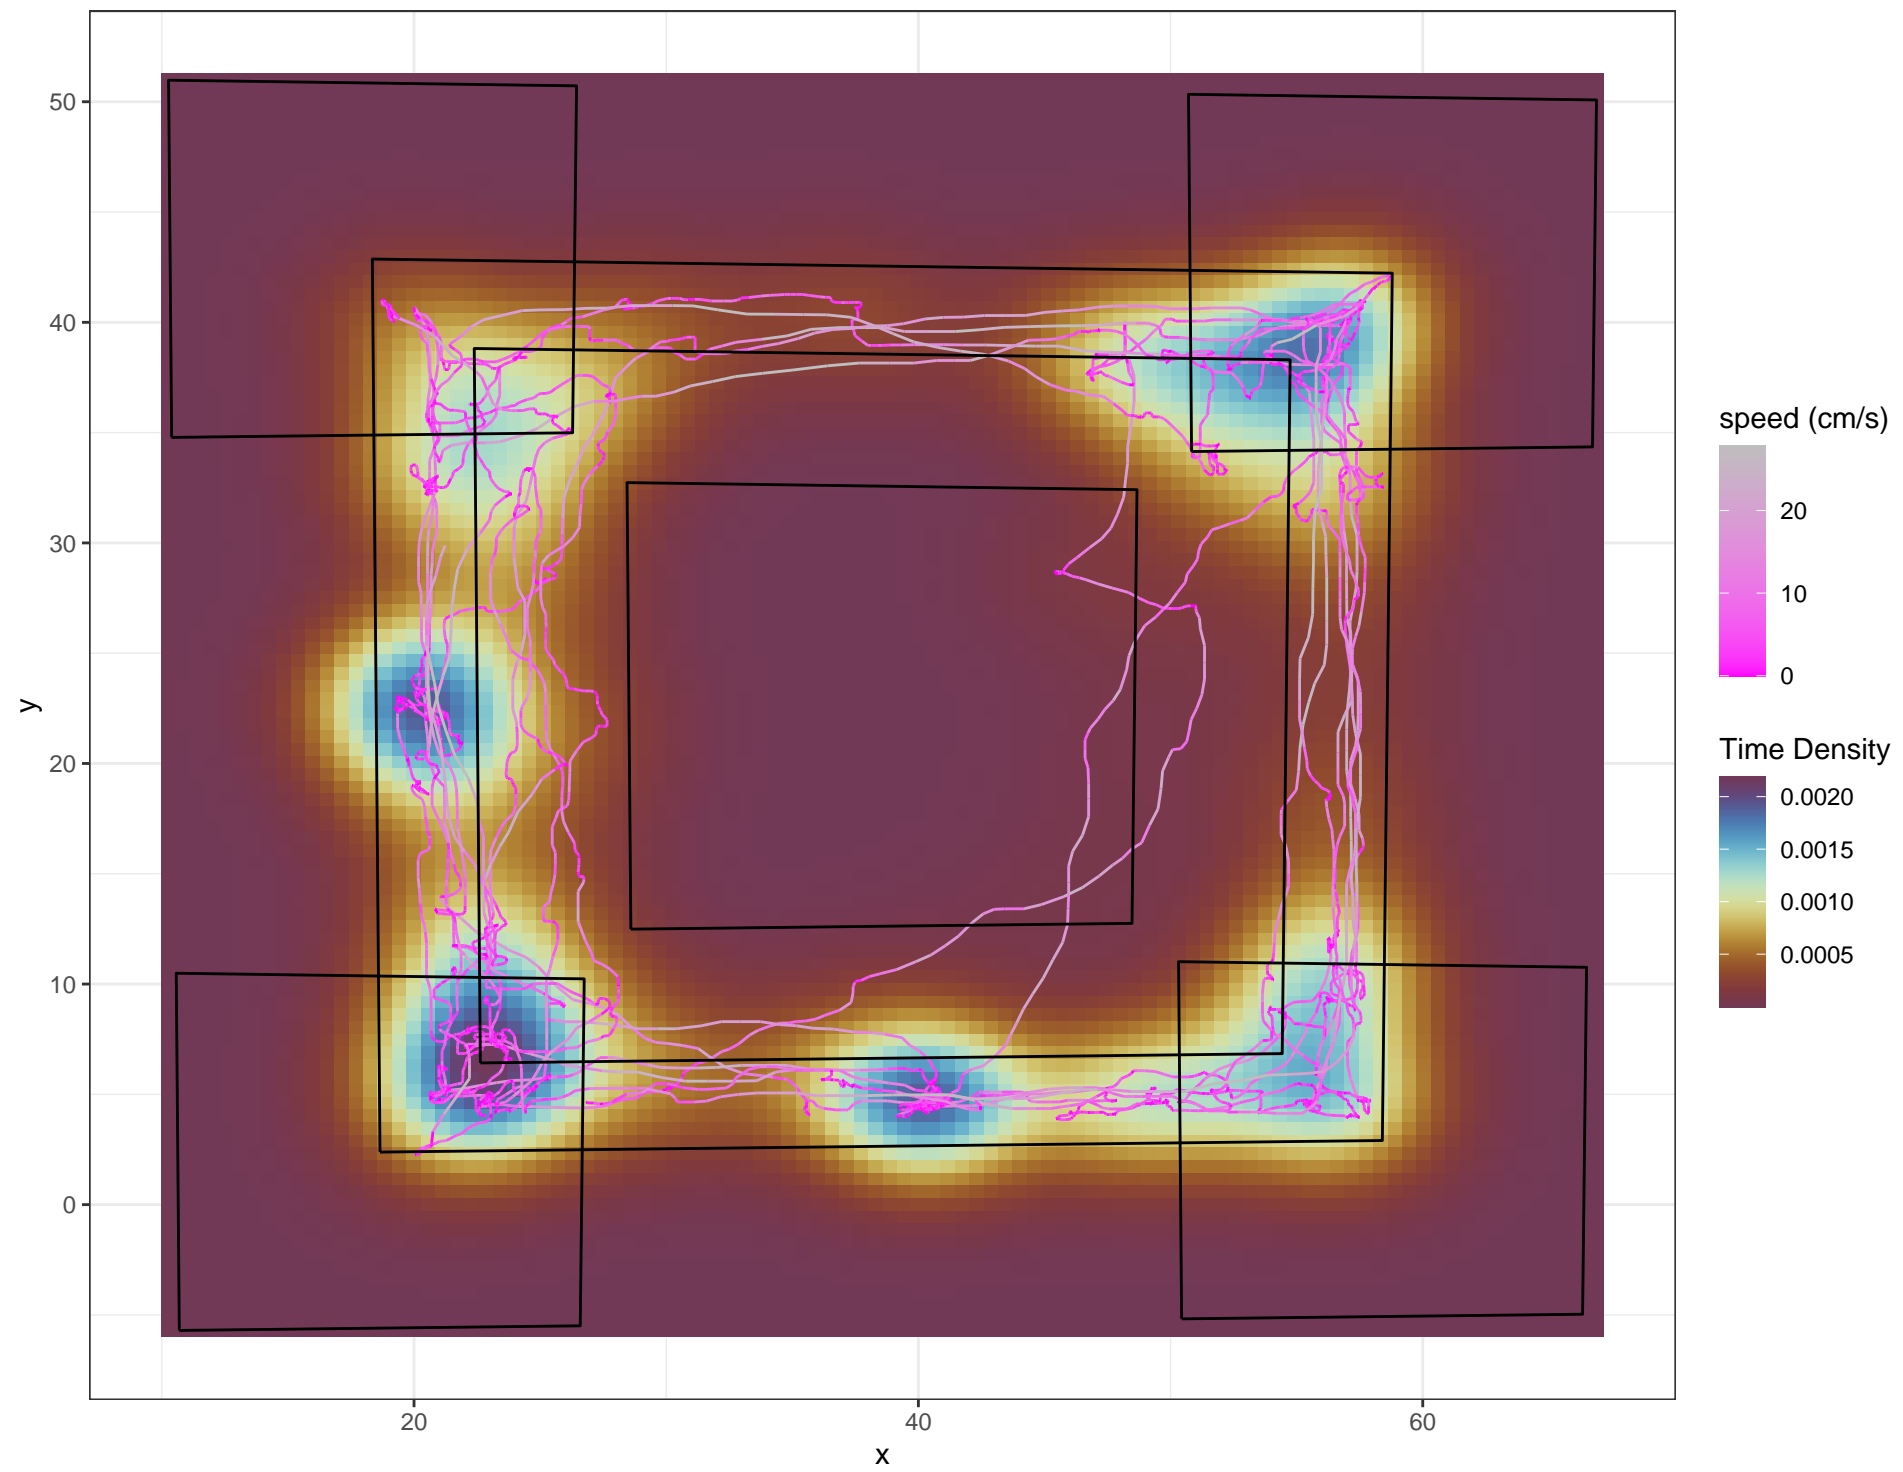



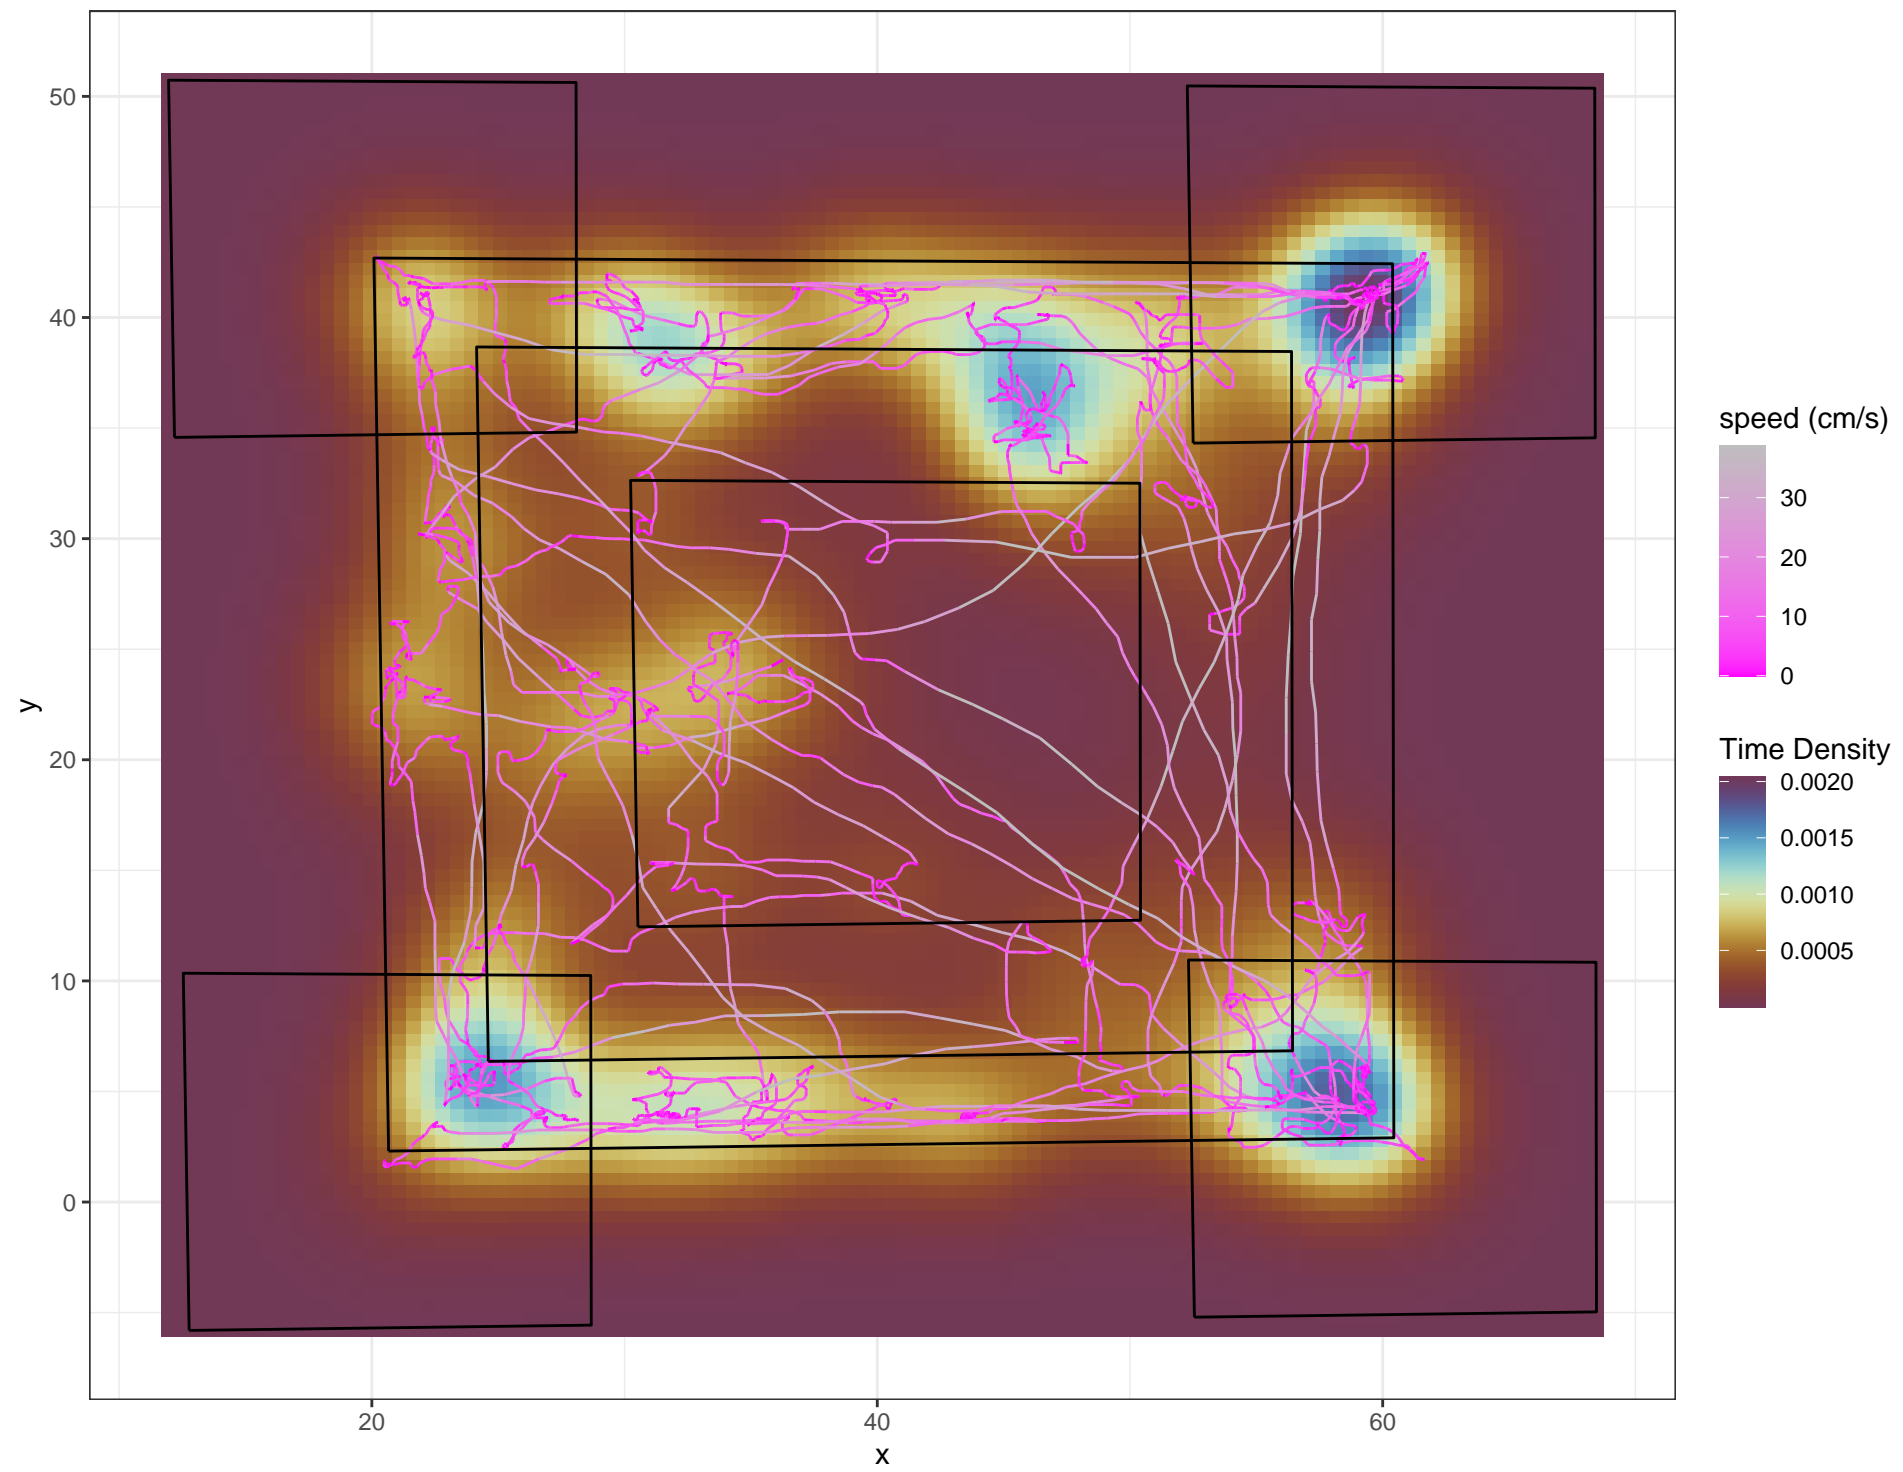

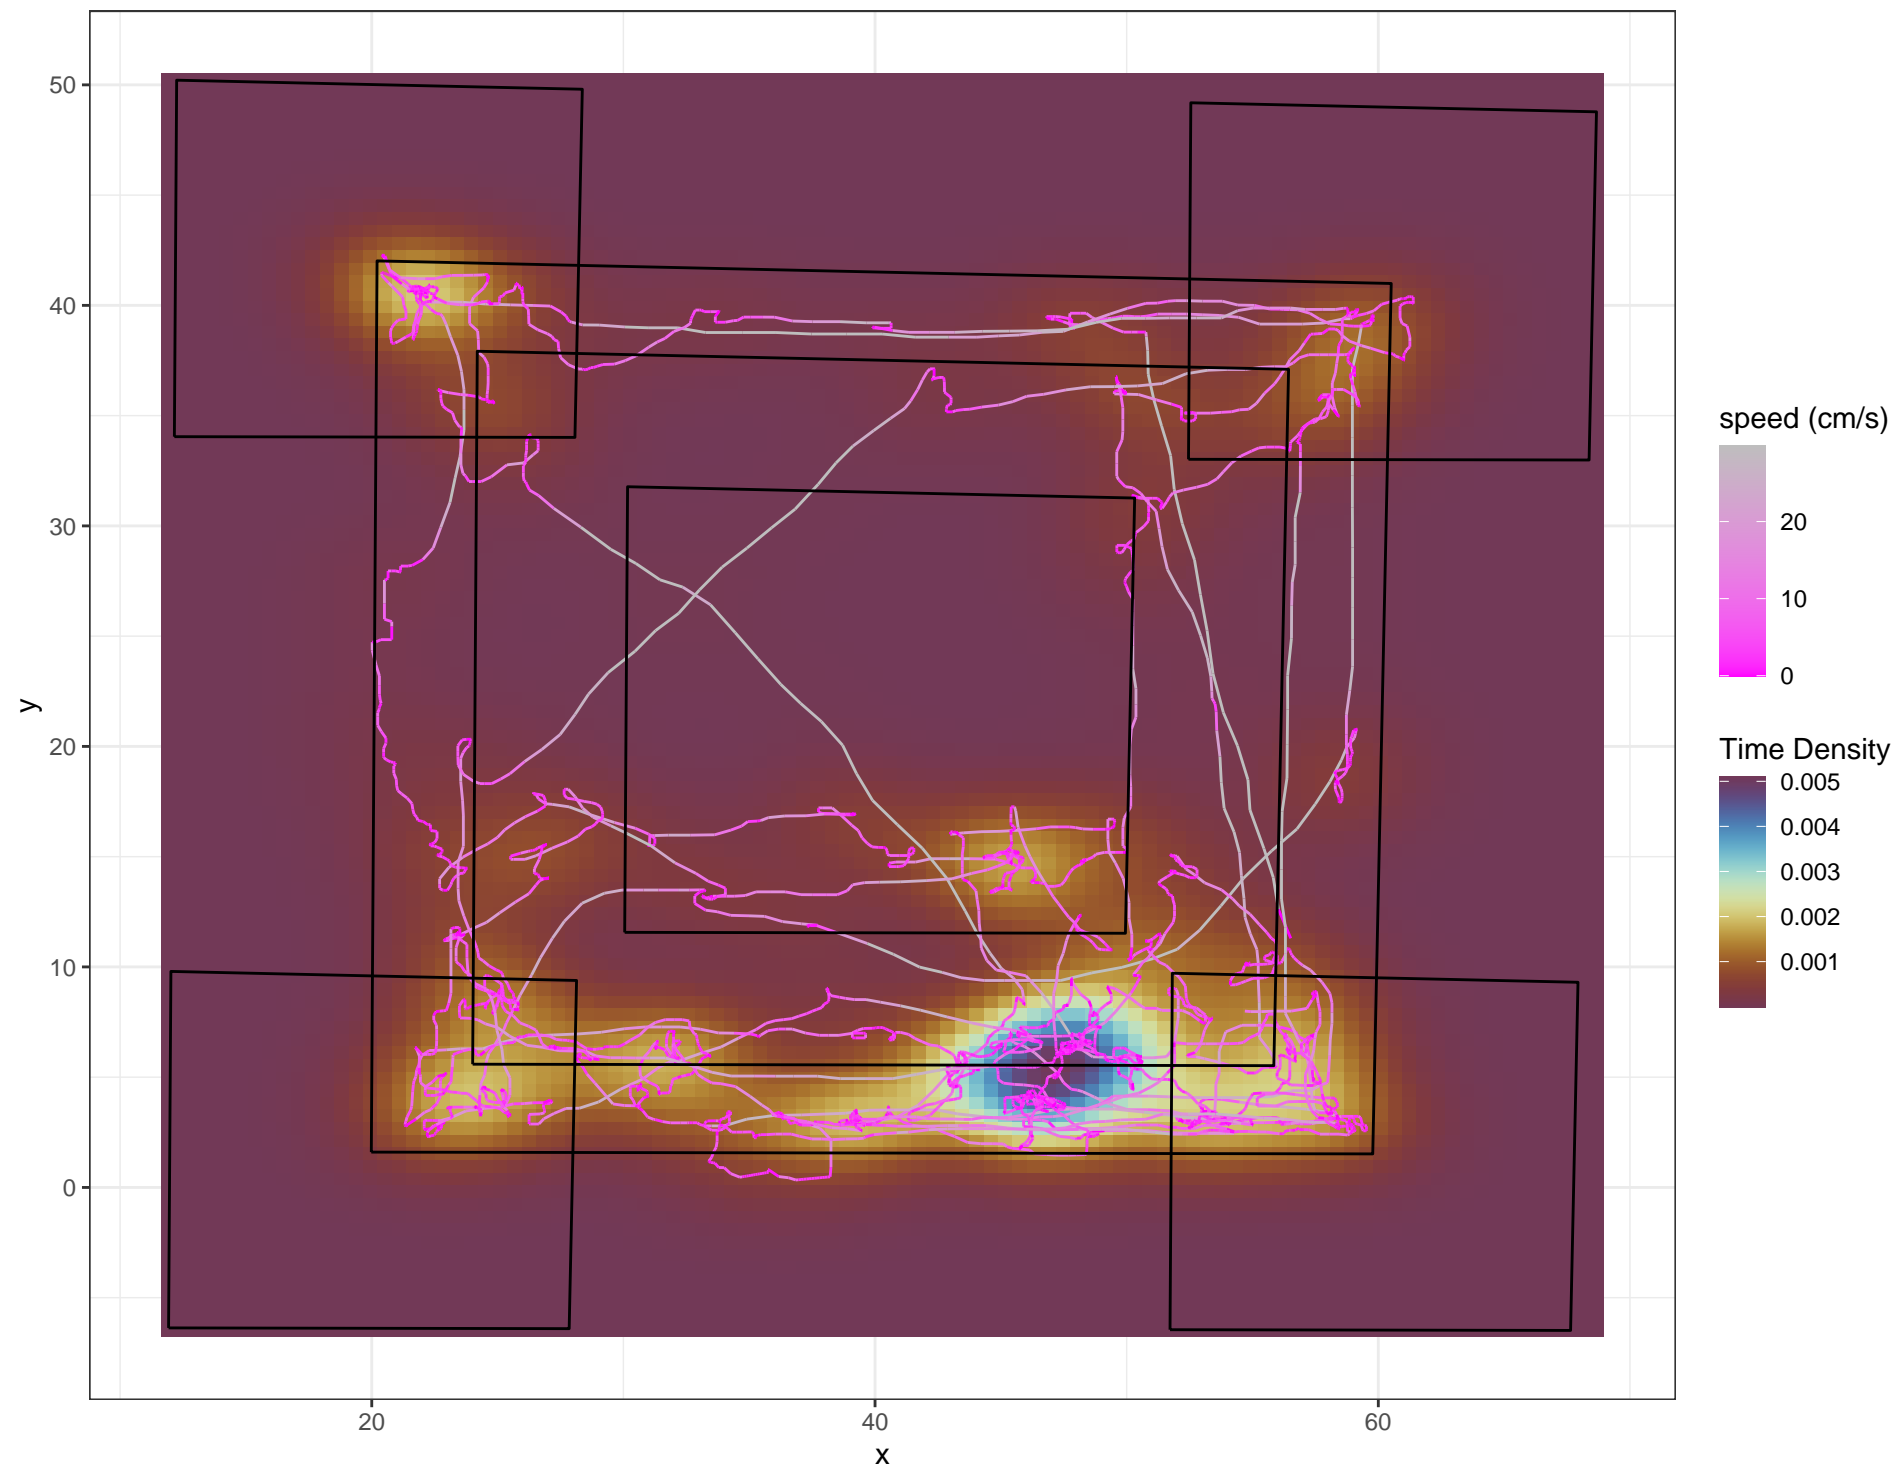

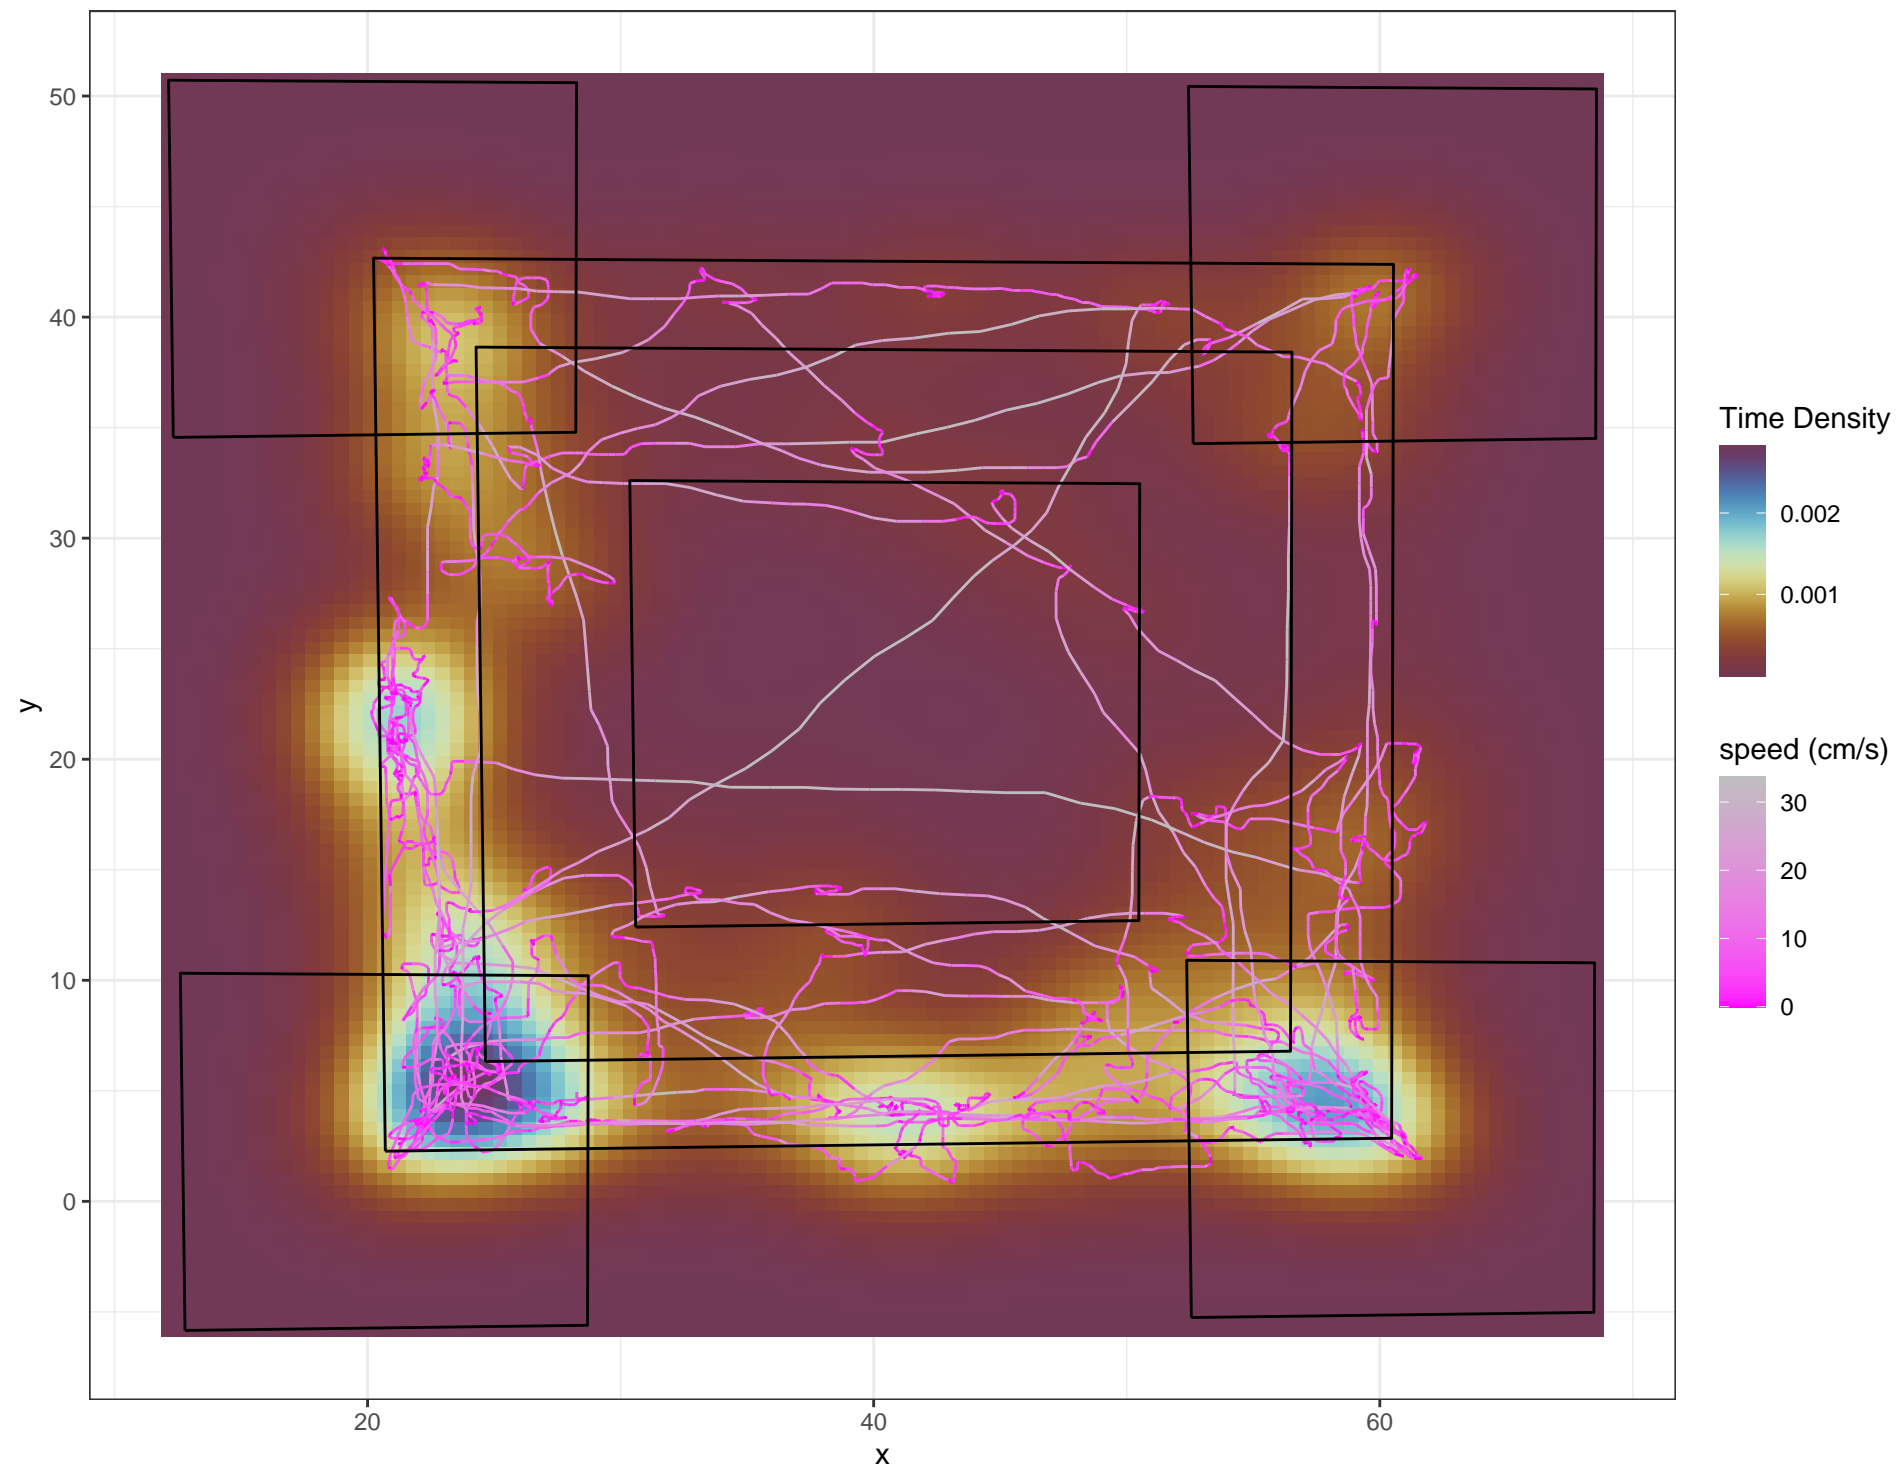

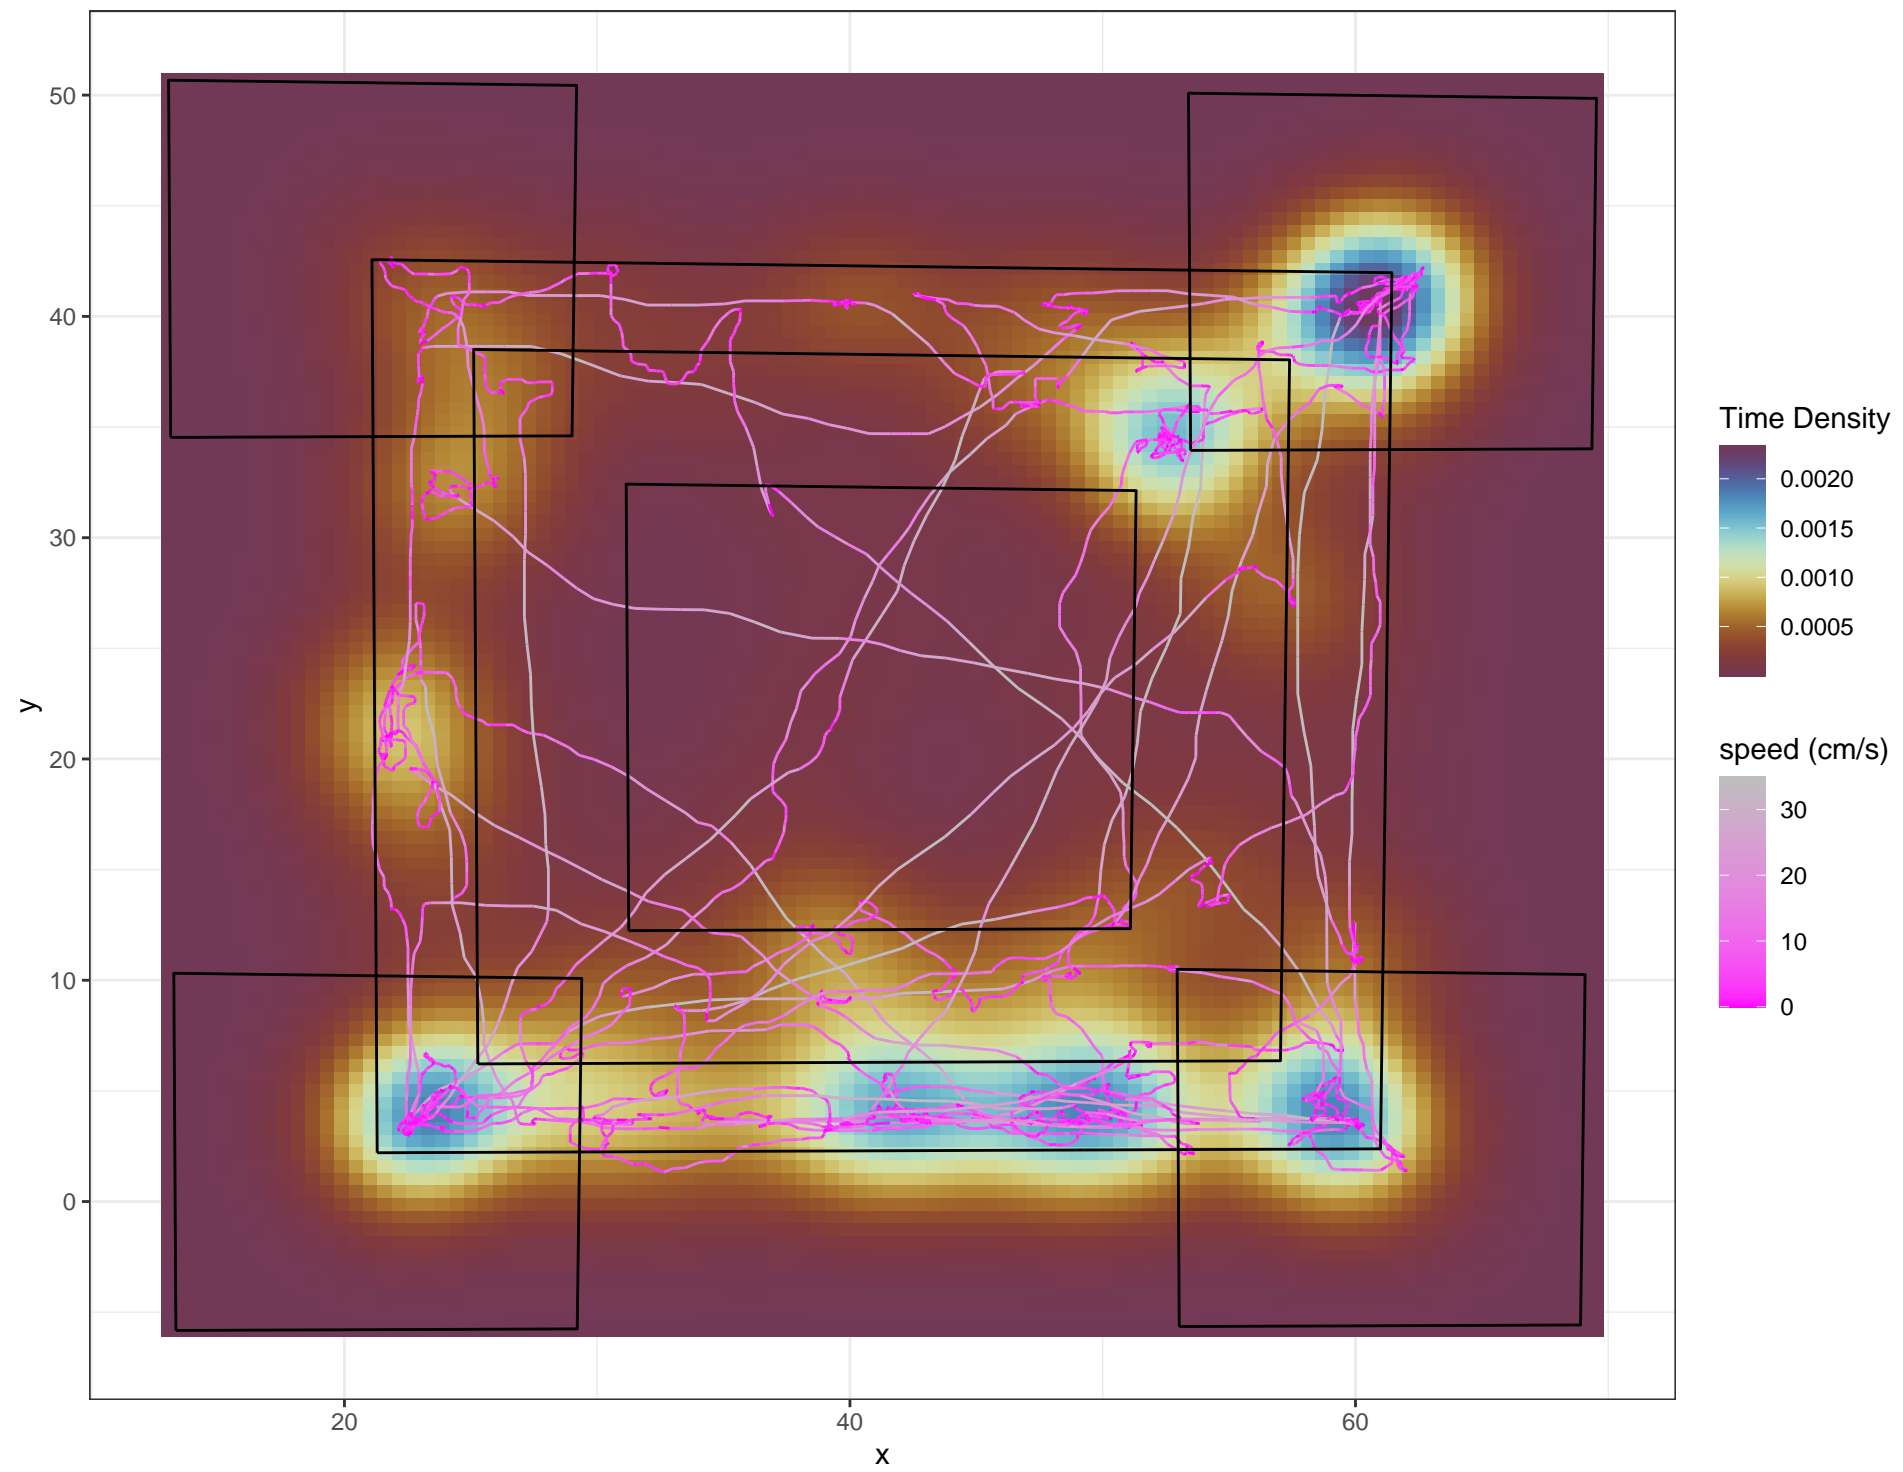

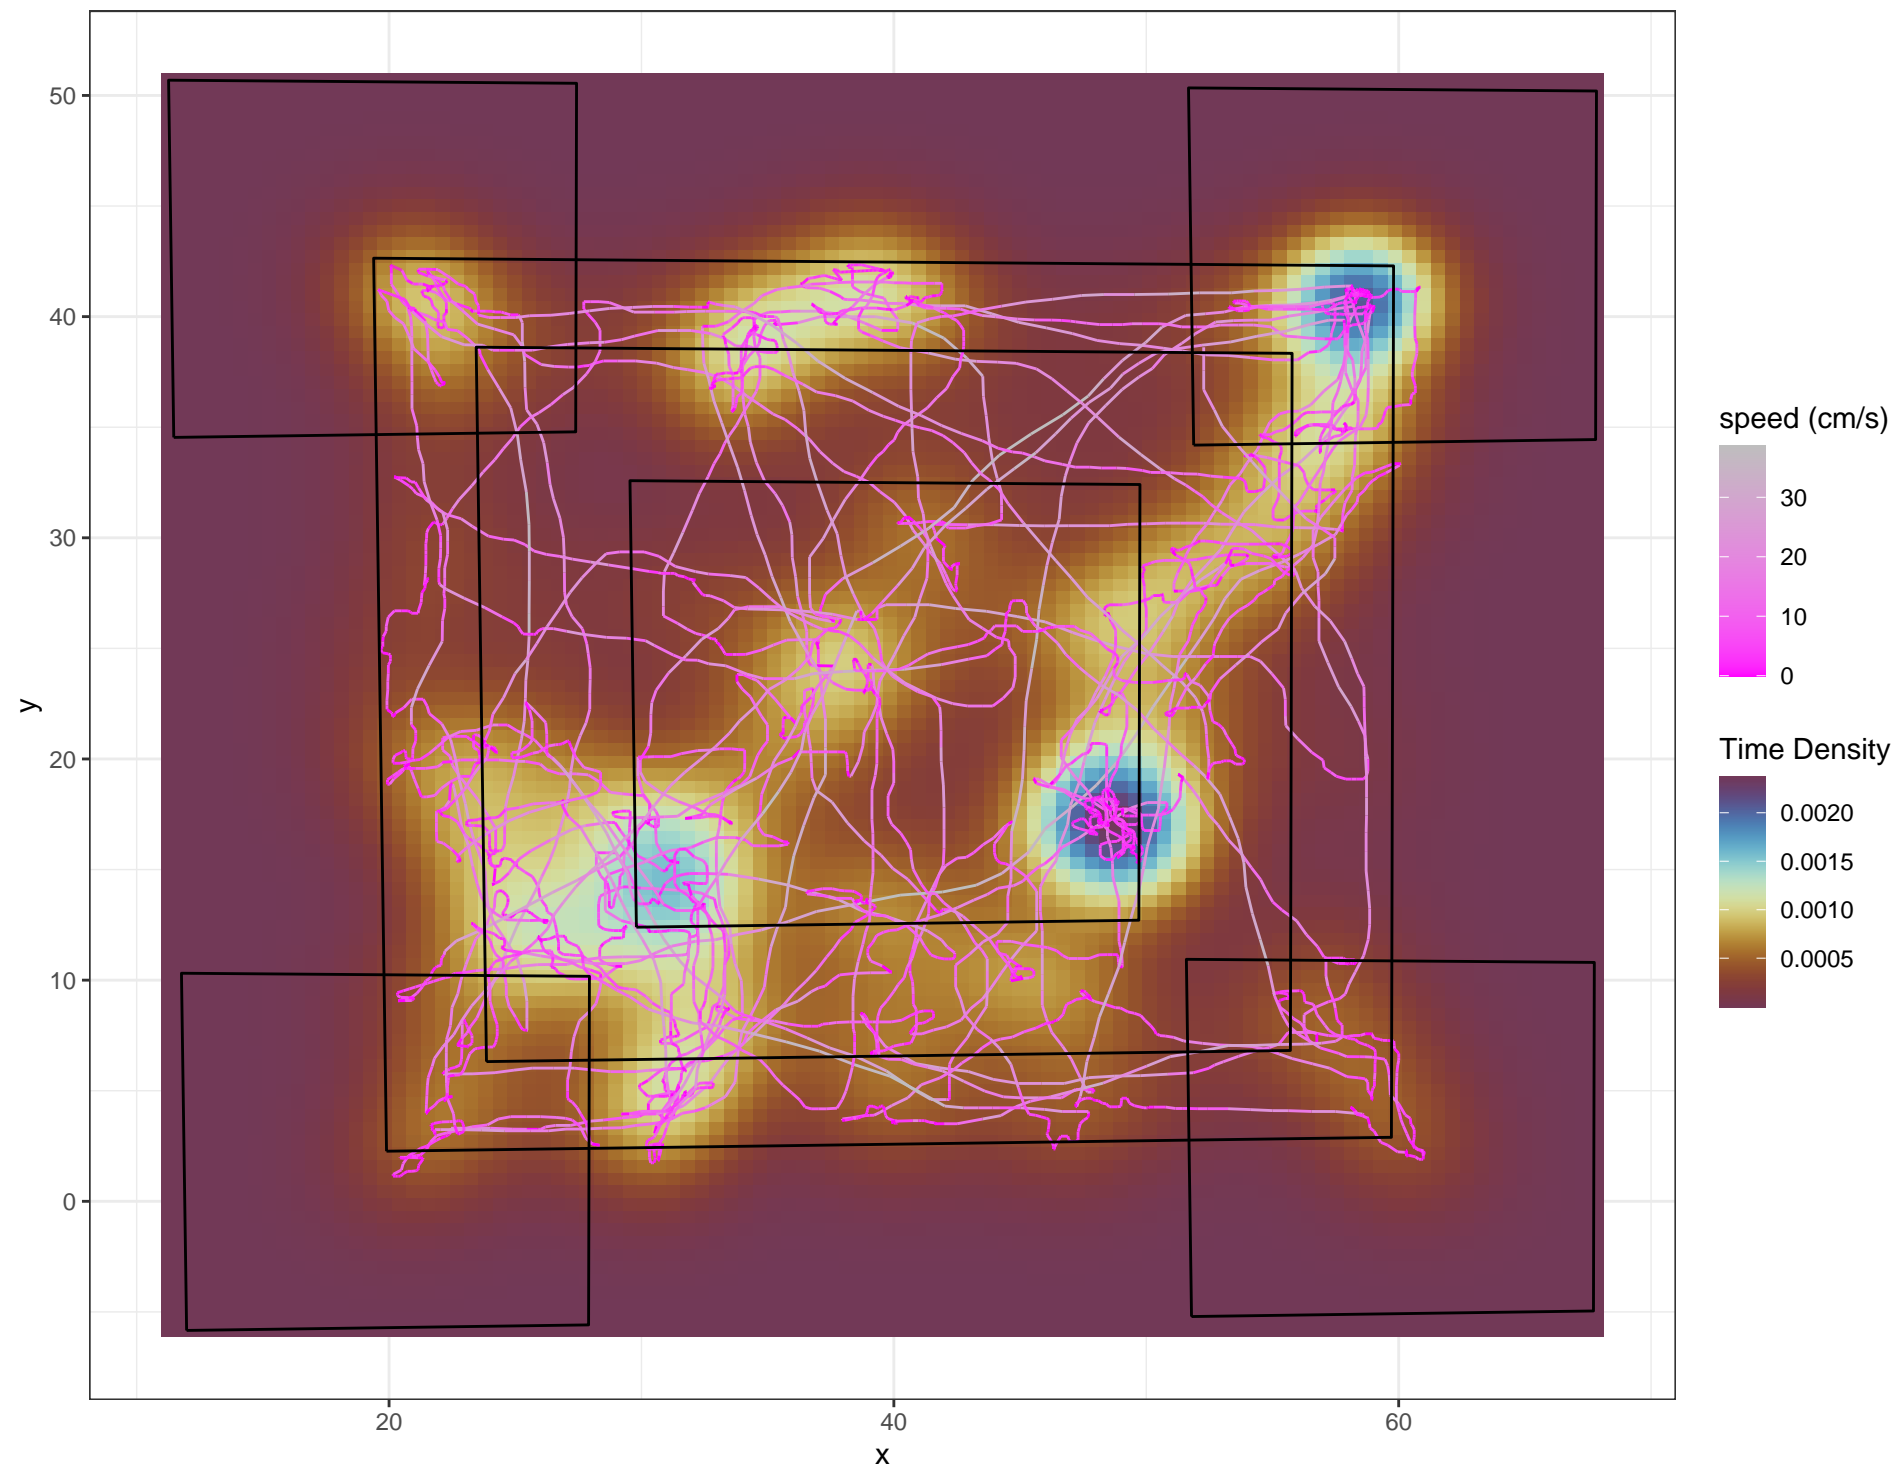

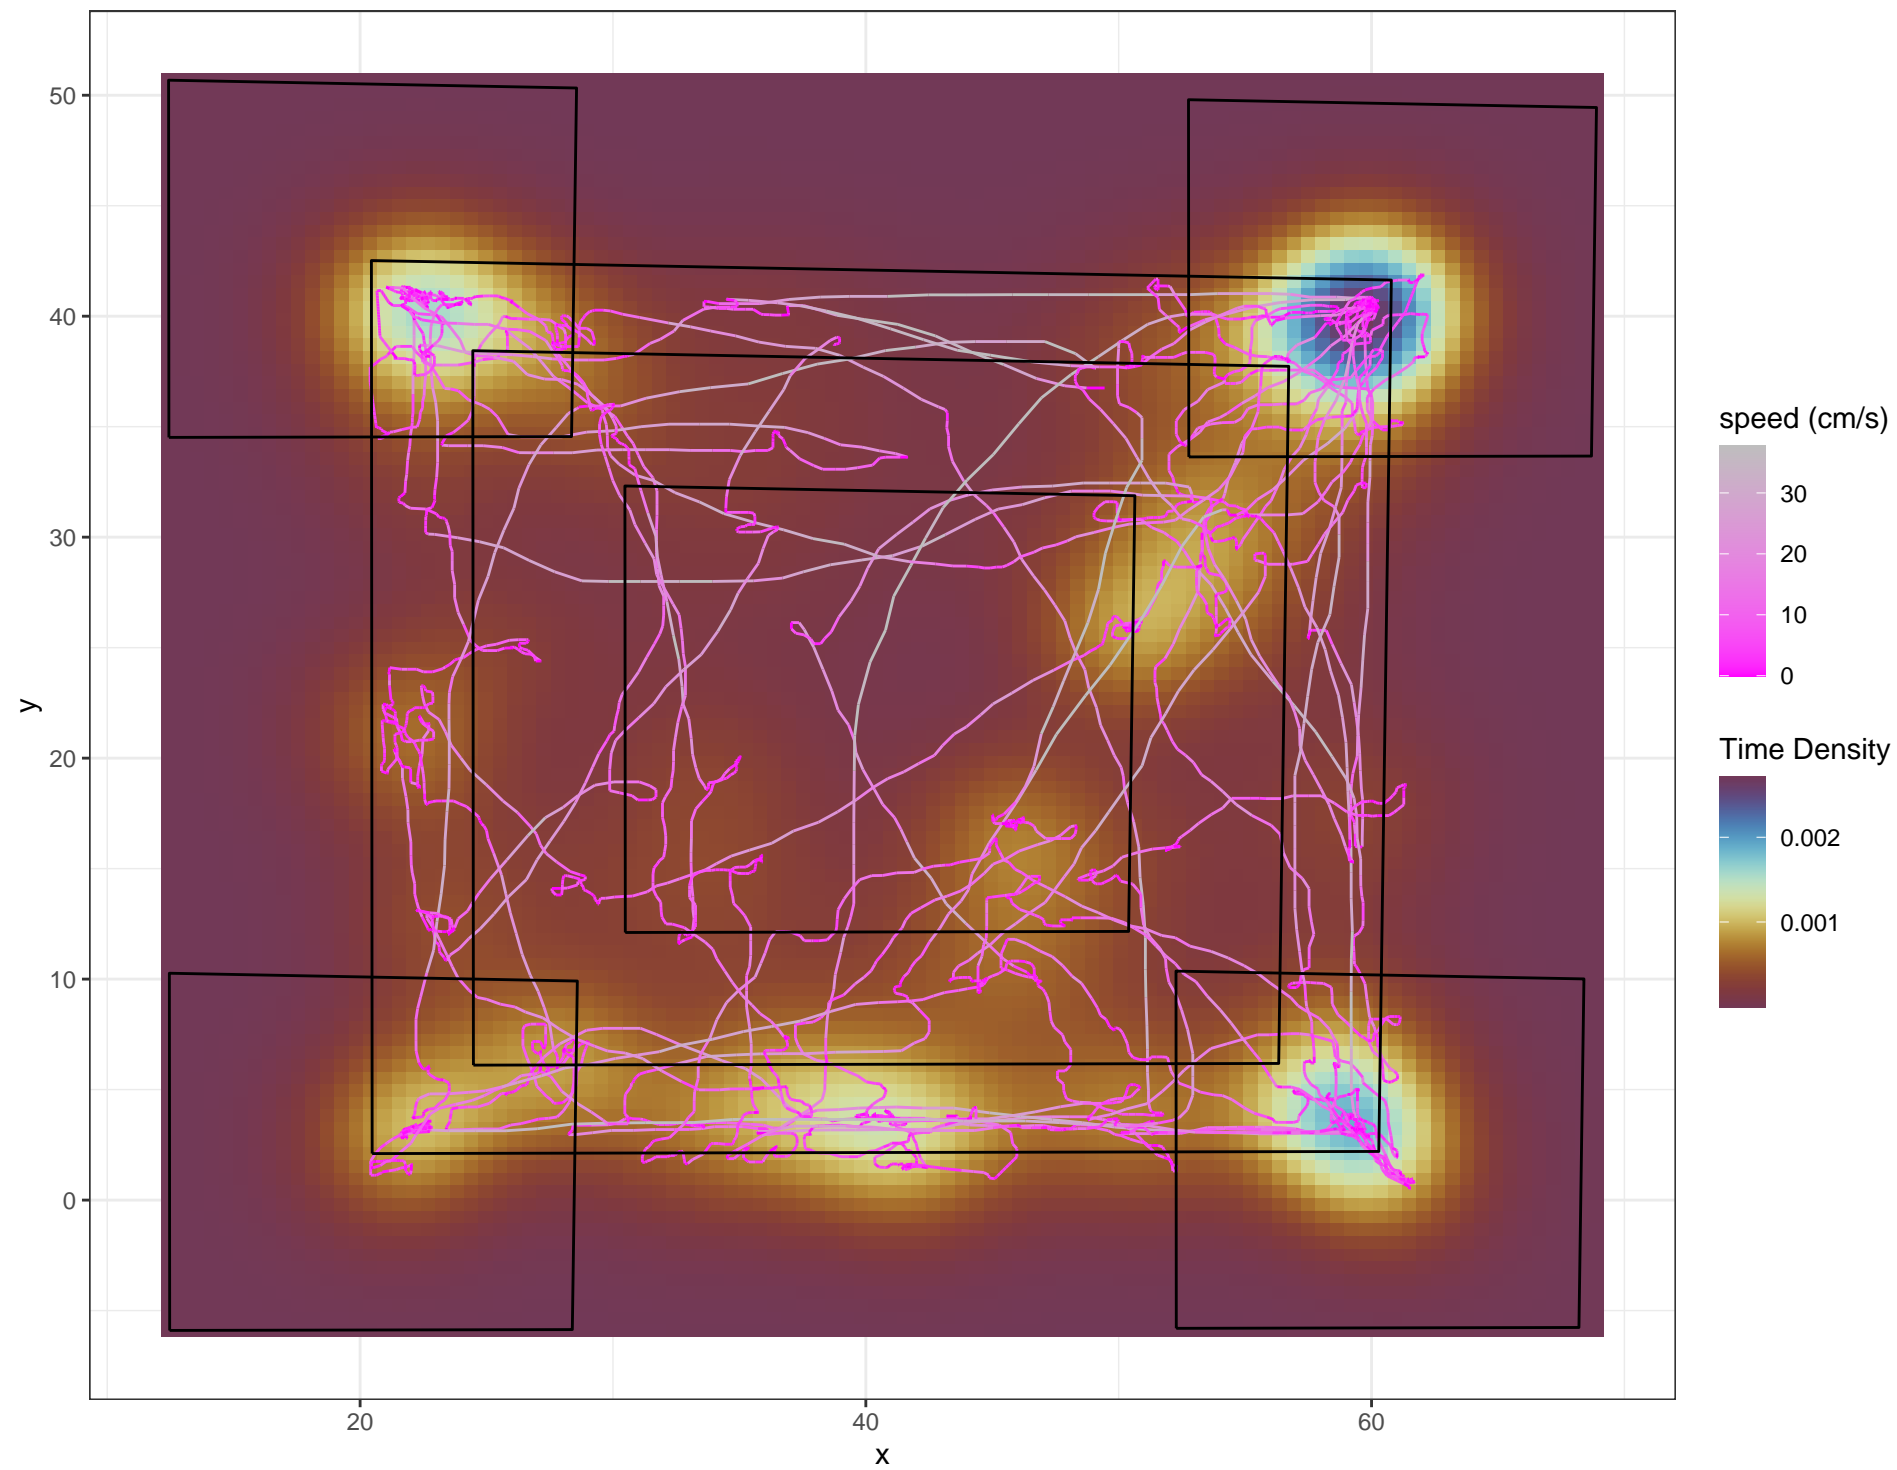

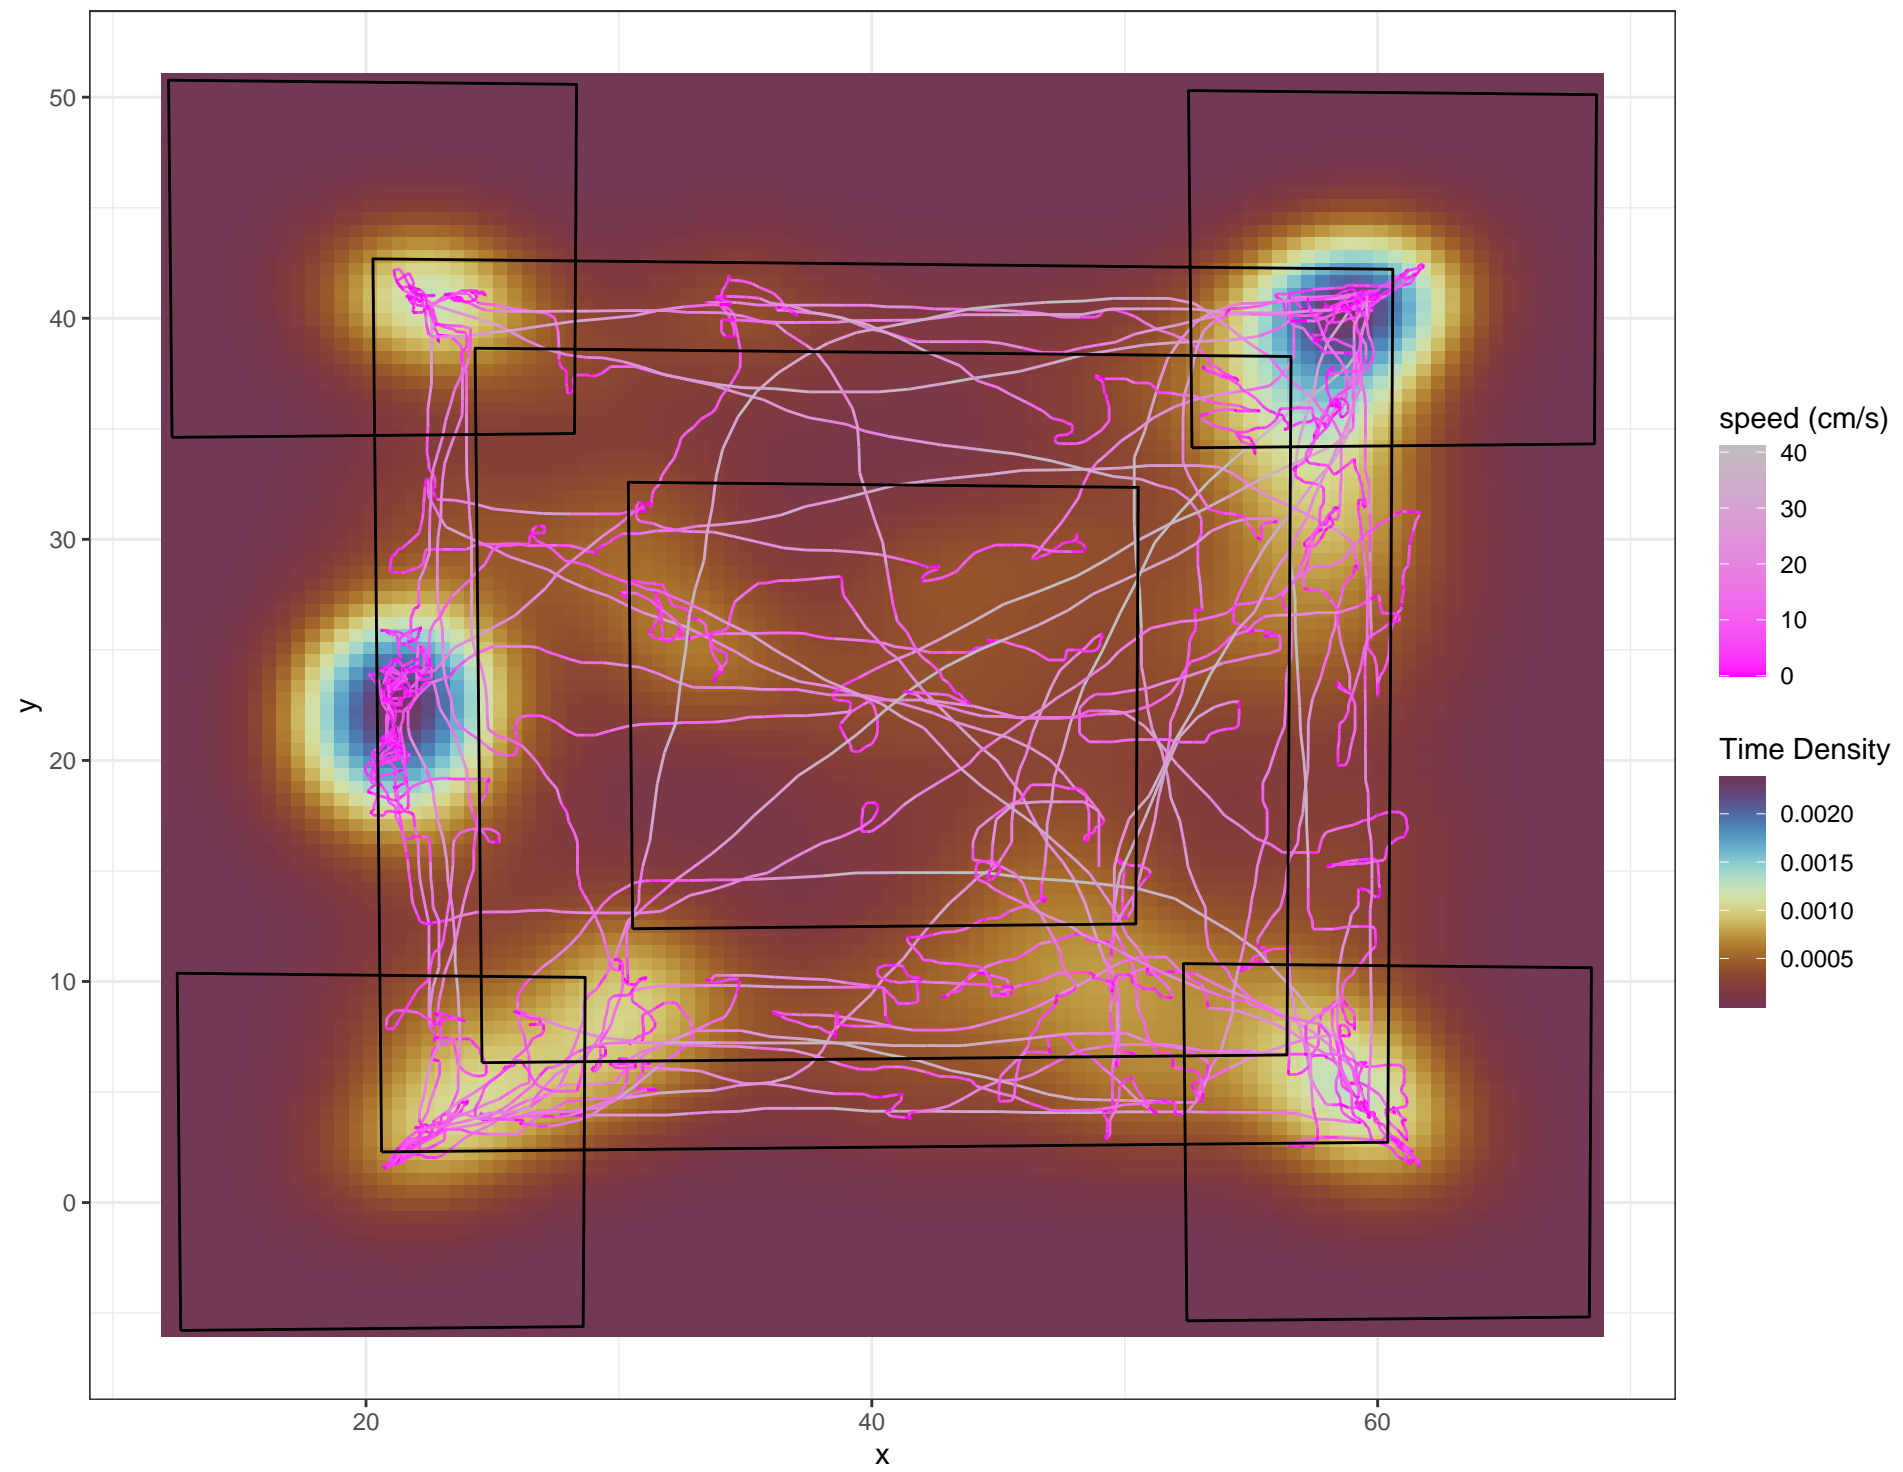

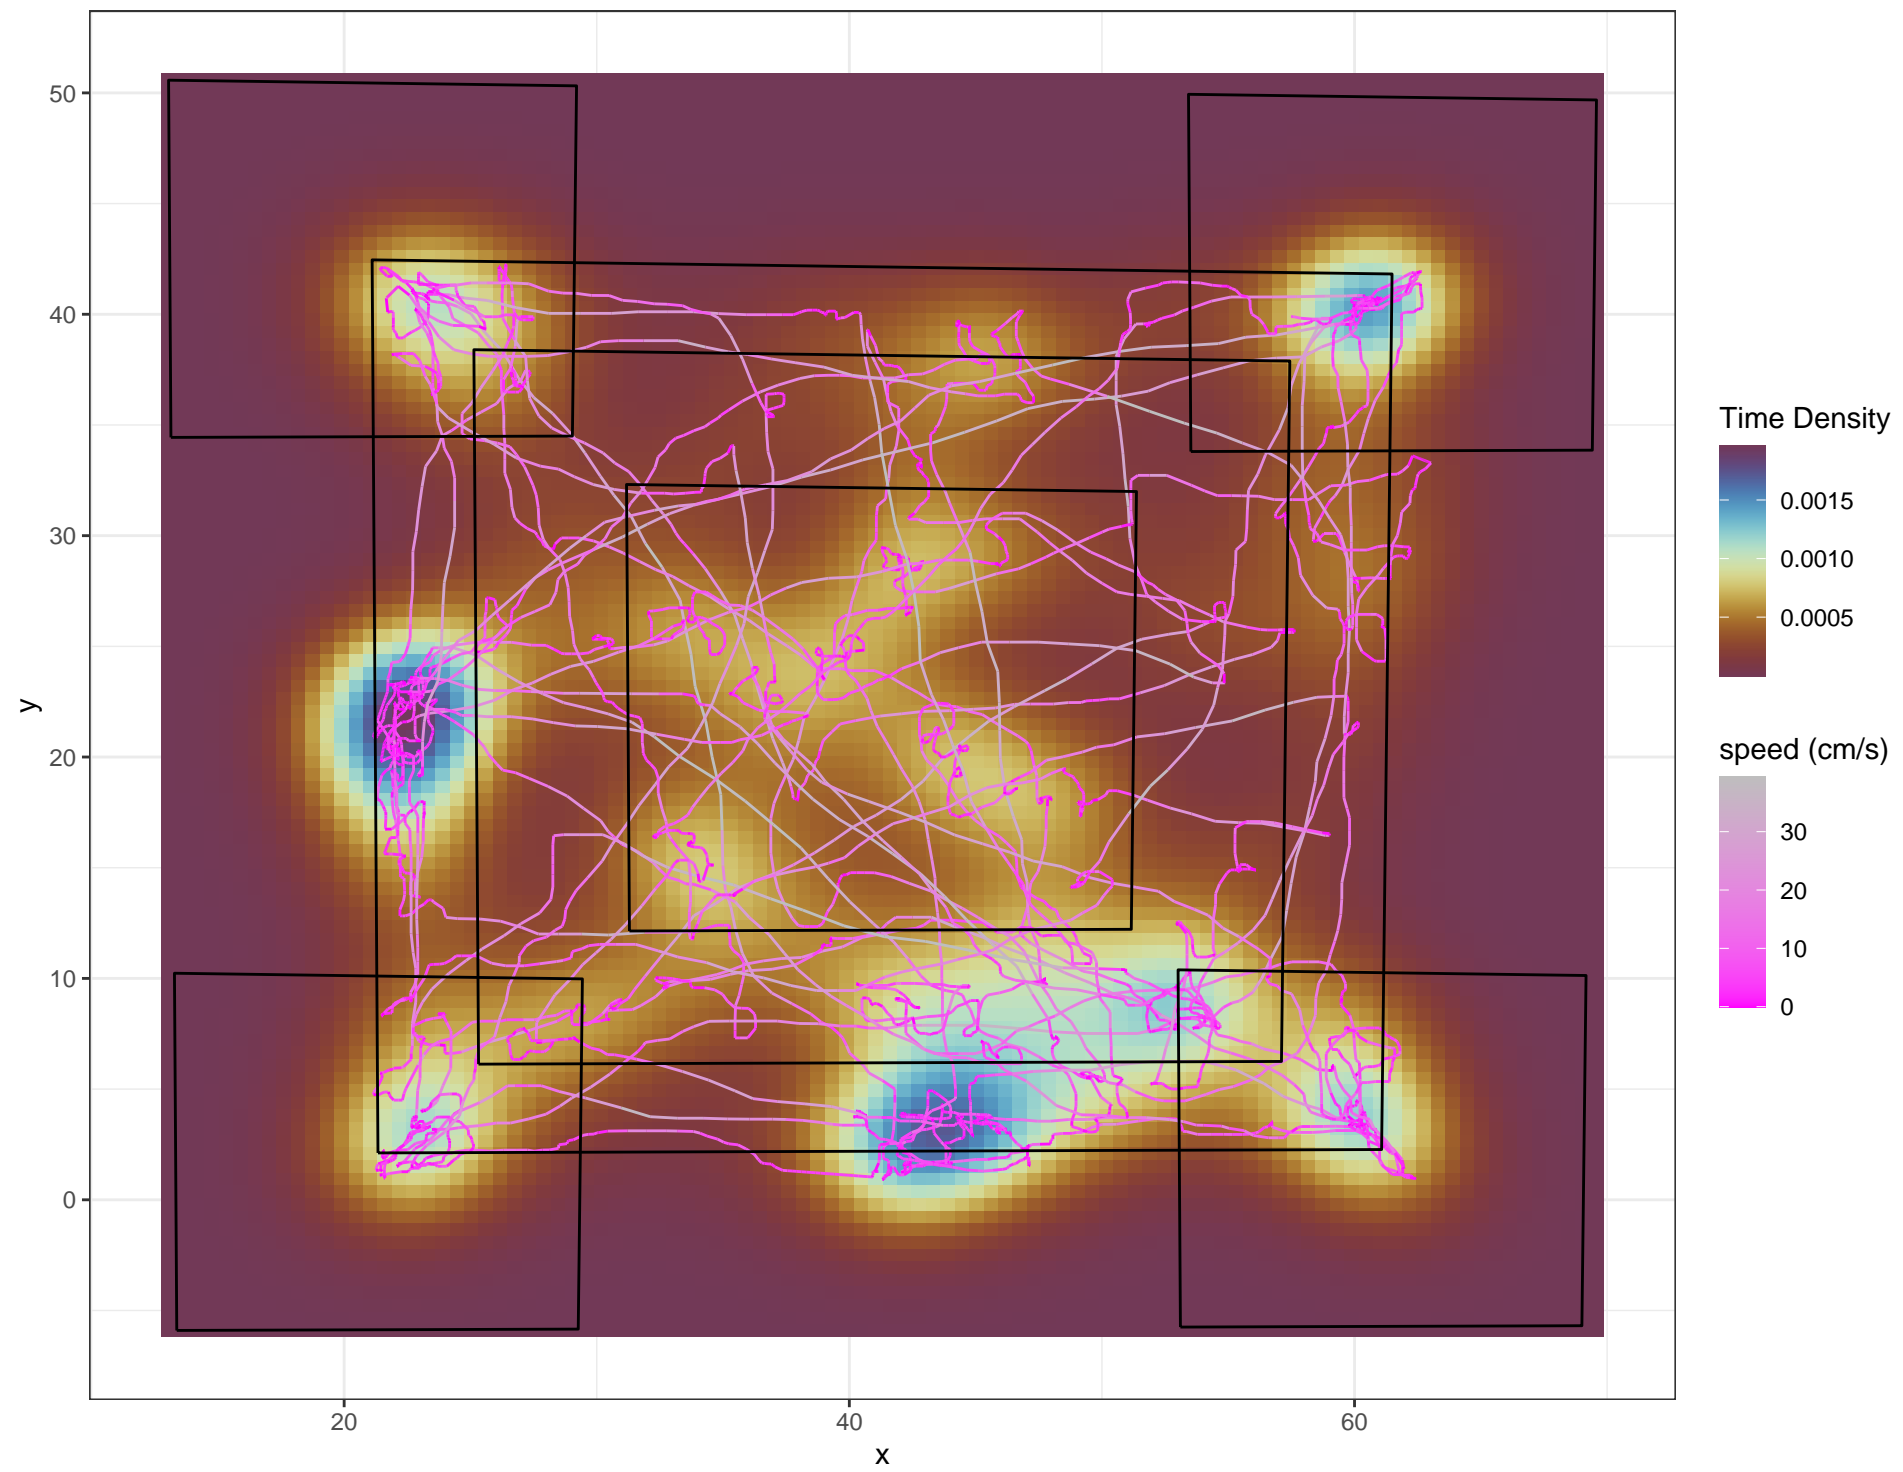



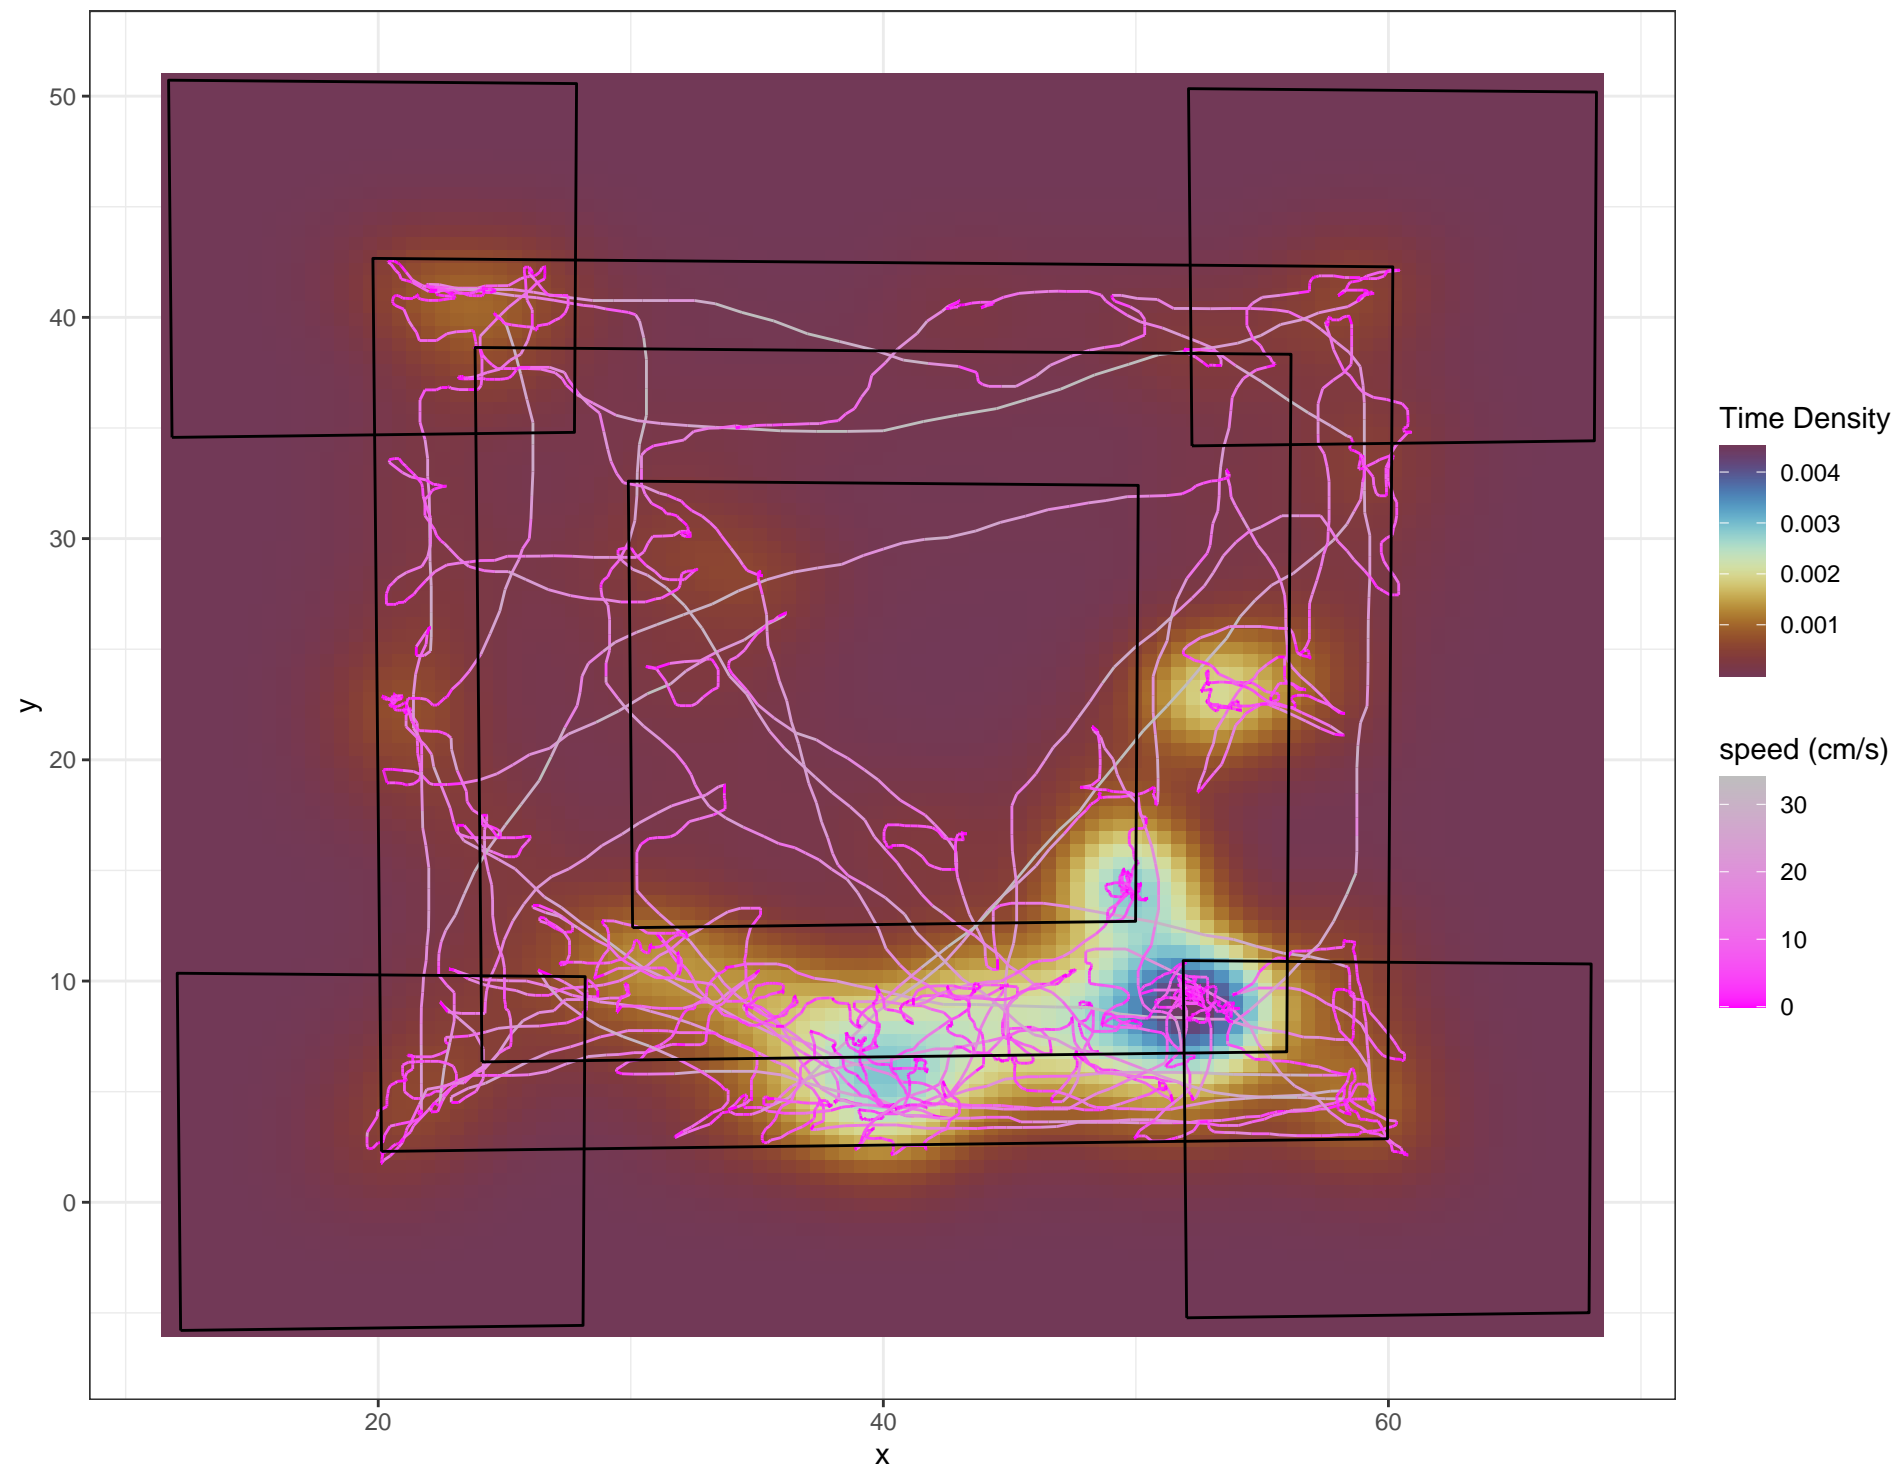

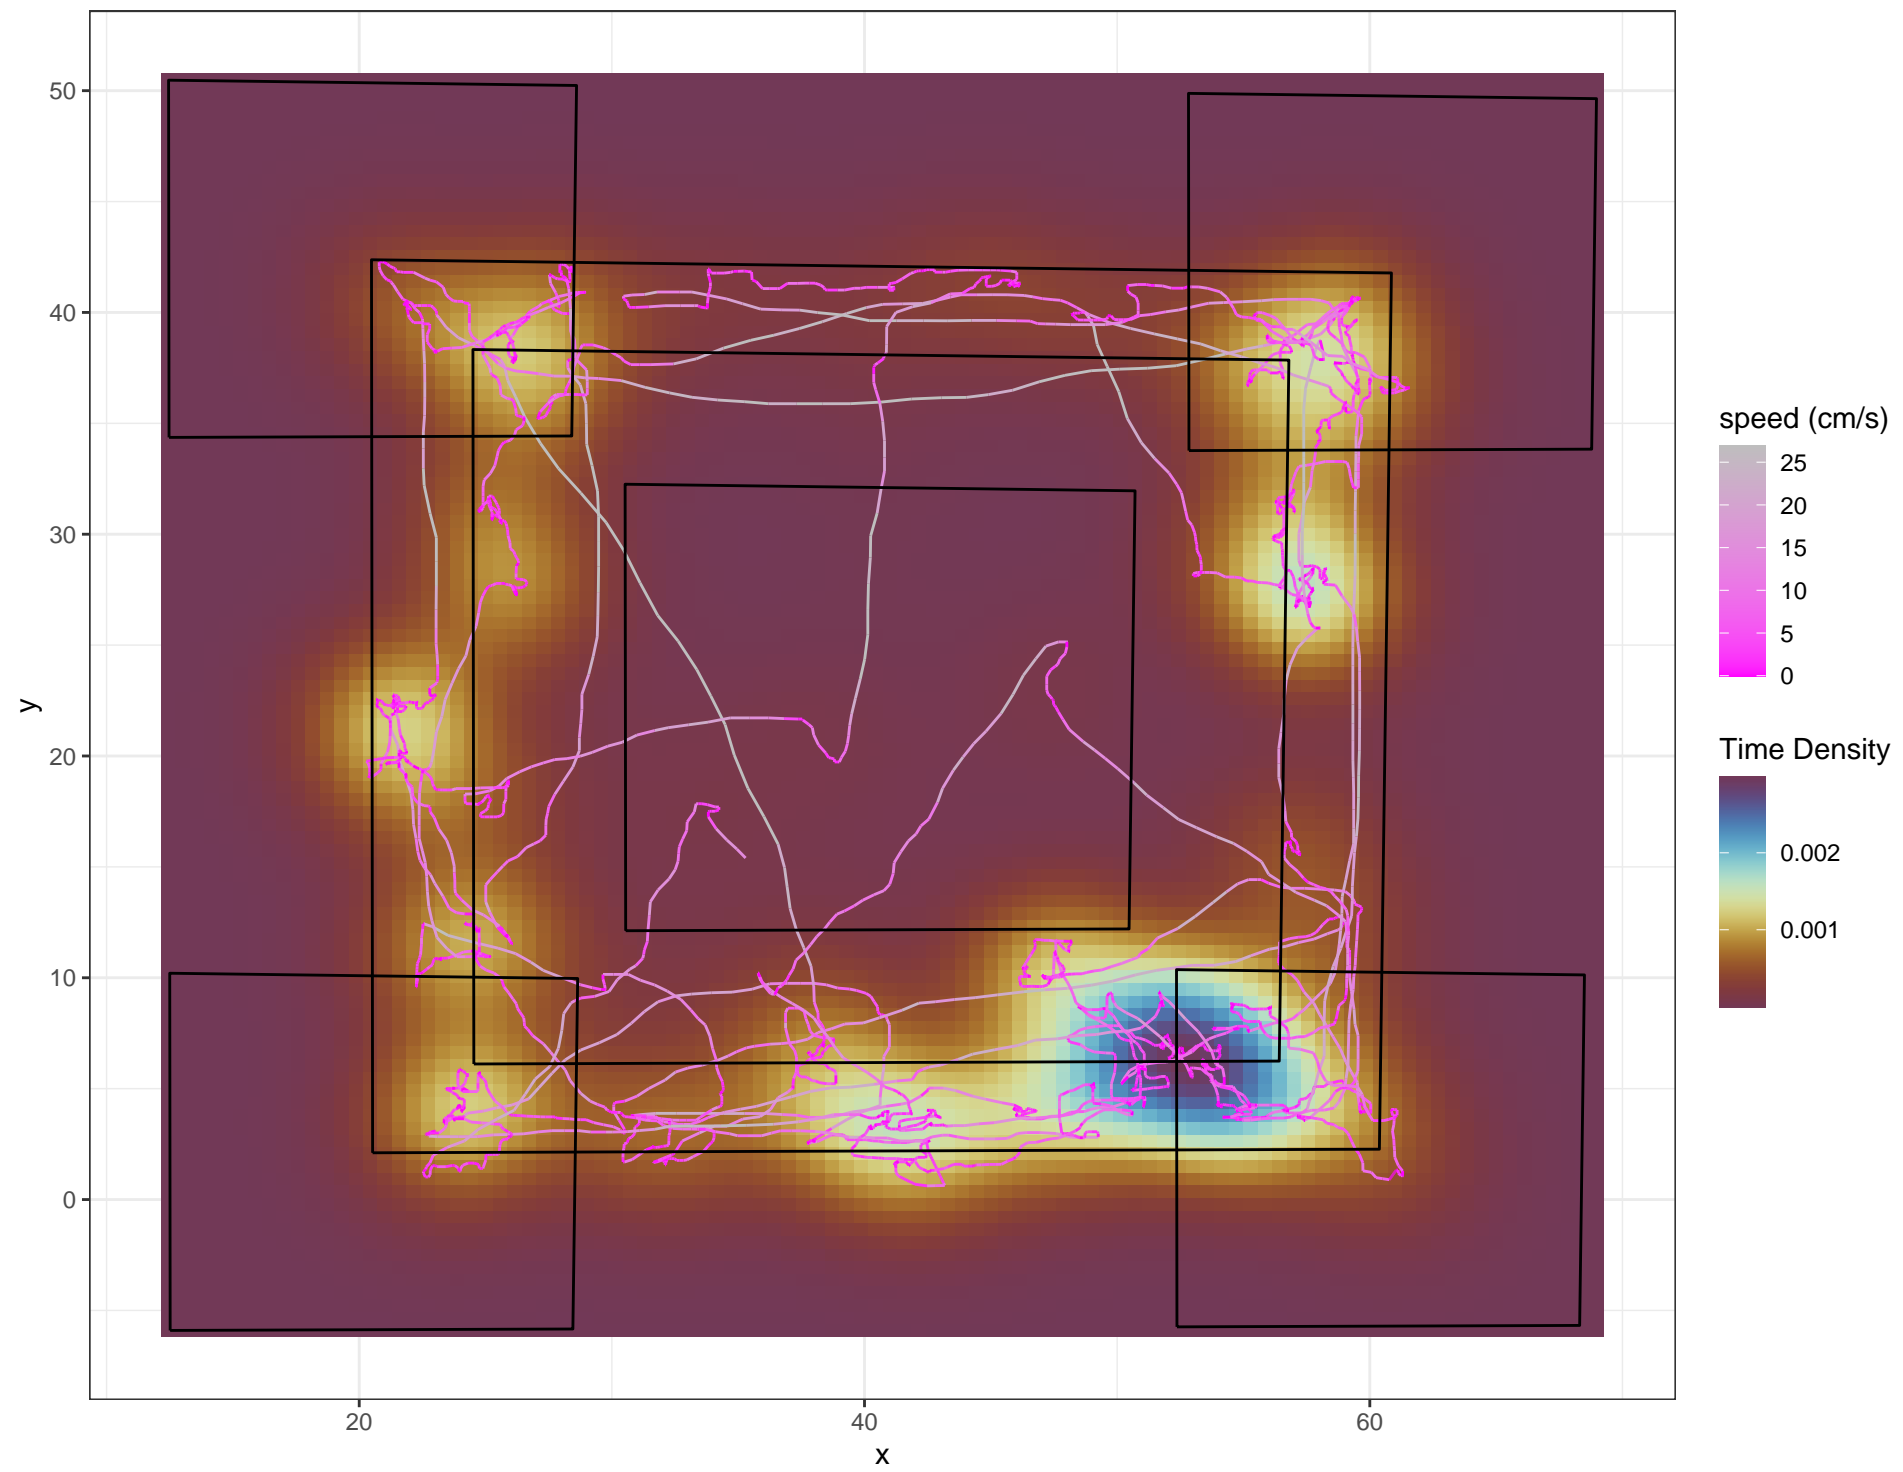

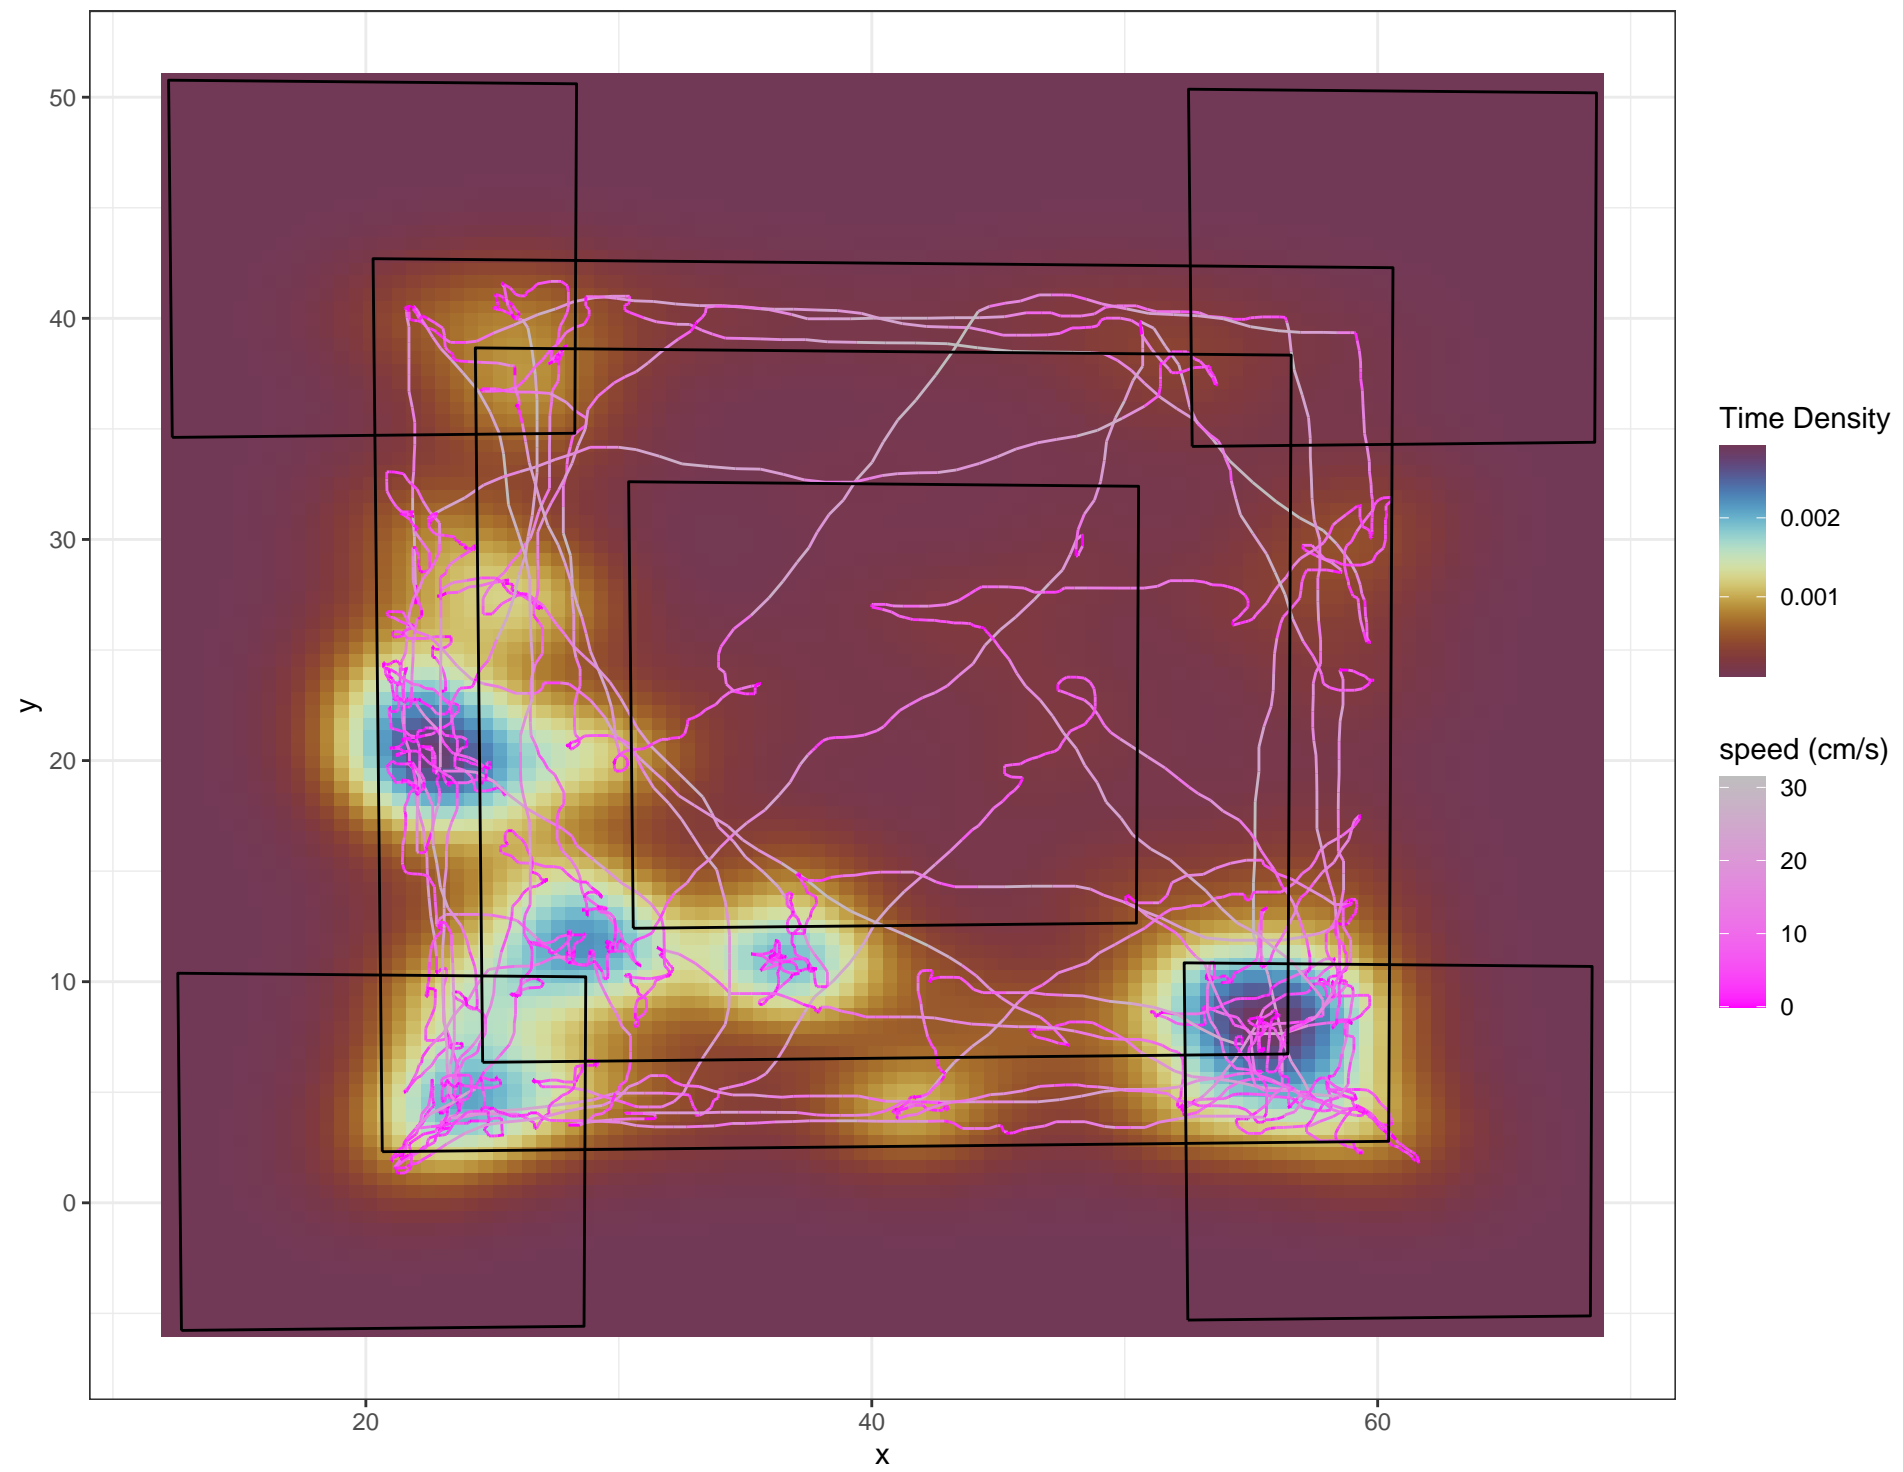

Occiput OF\_top\_DREADD\_36-Clo2DLC\_resnet50\_OpenFieldDec23shuffle1\_600000\_filtered.csv

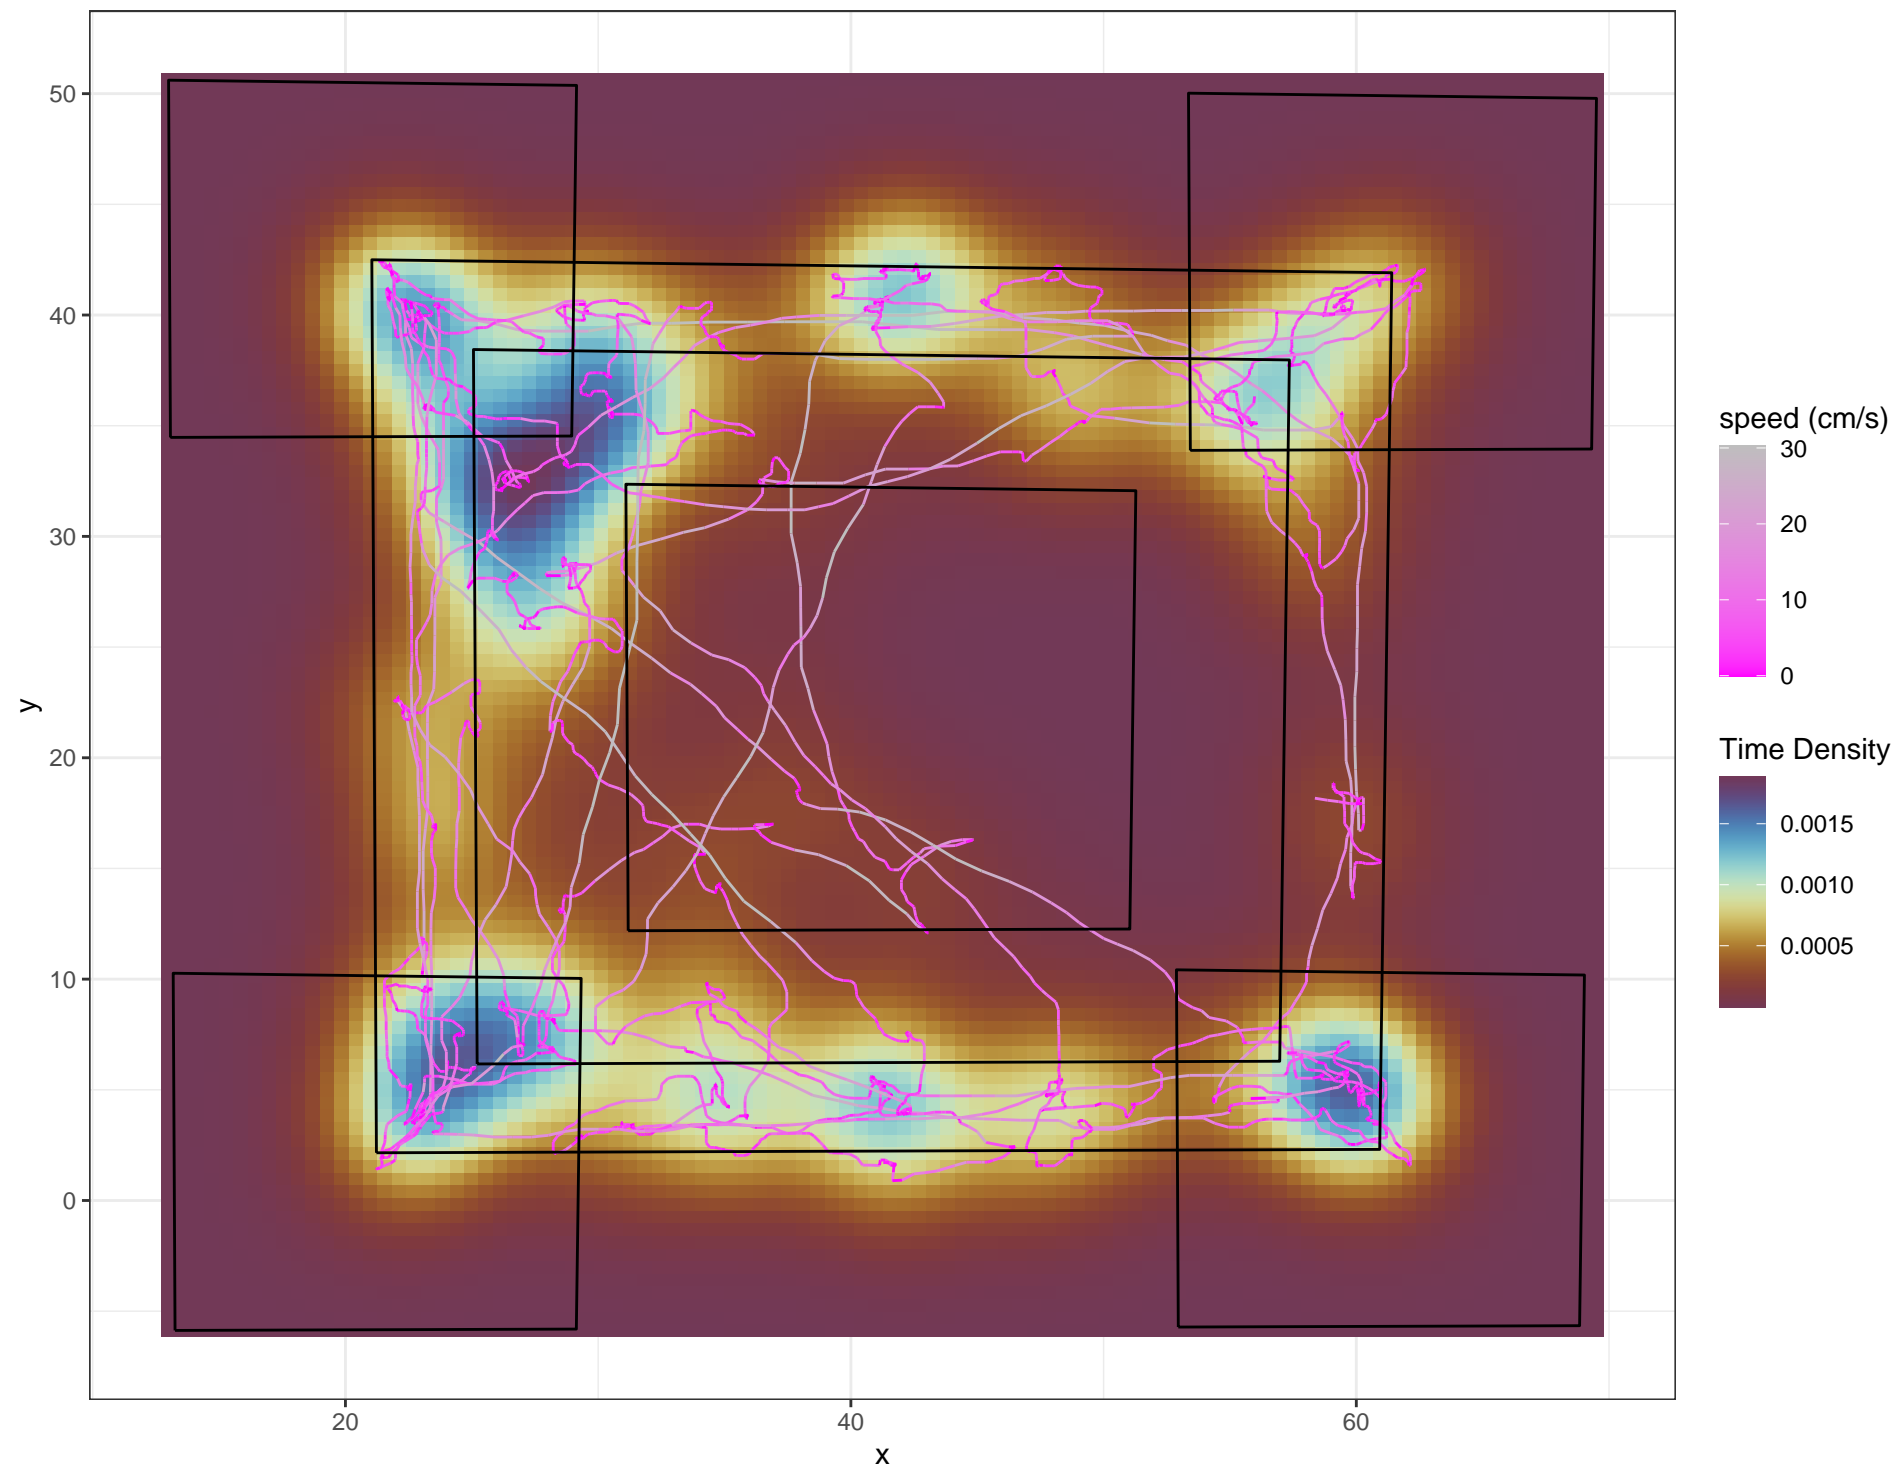

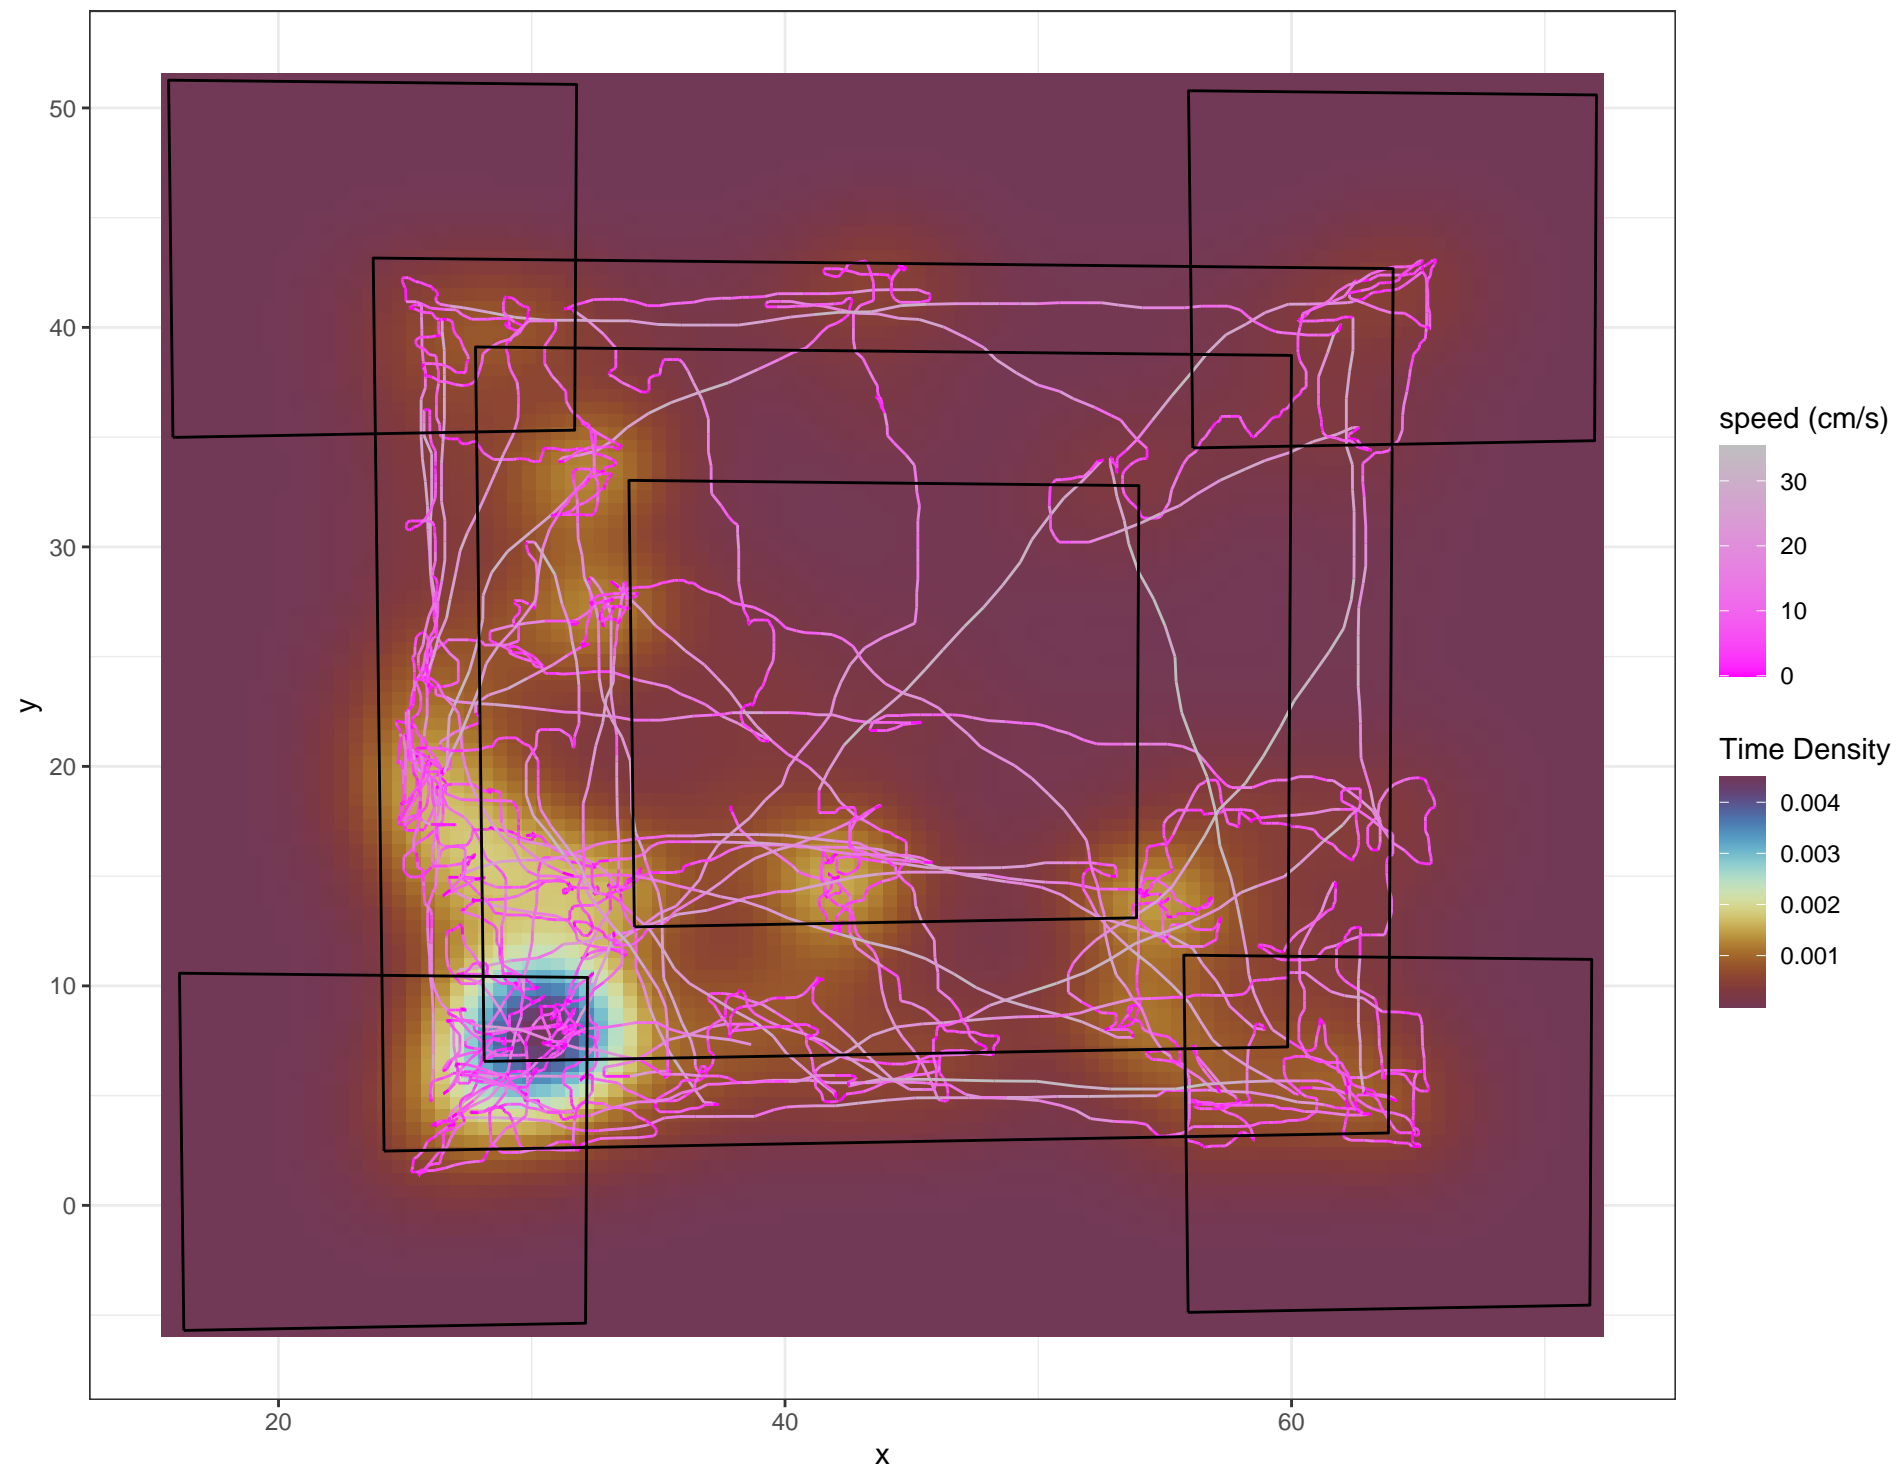

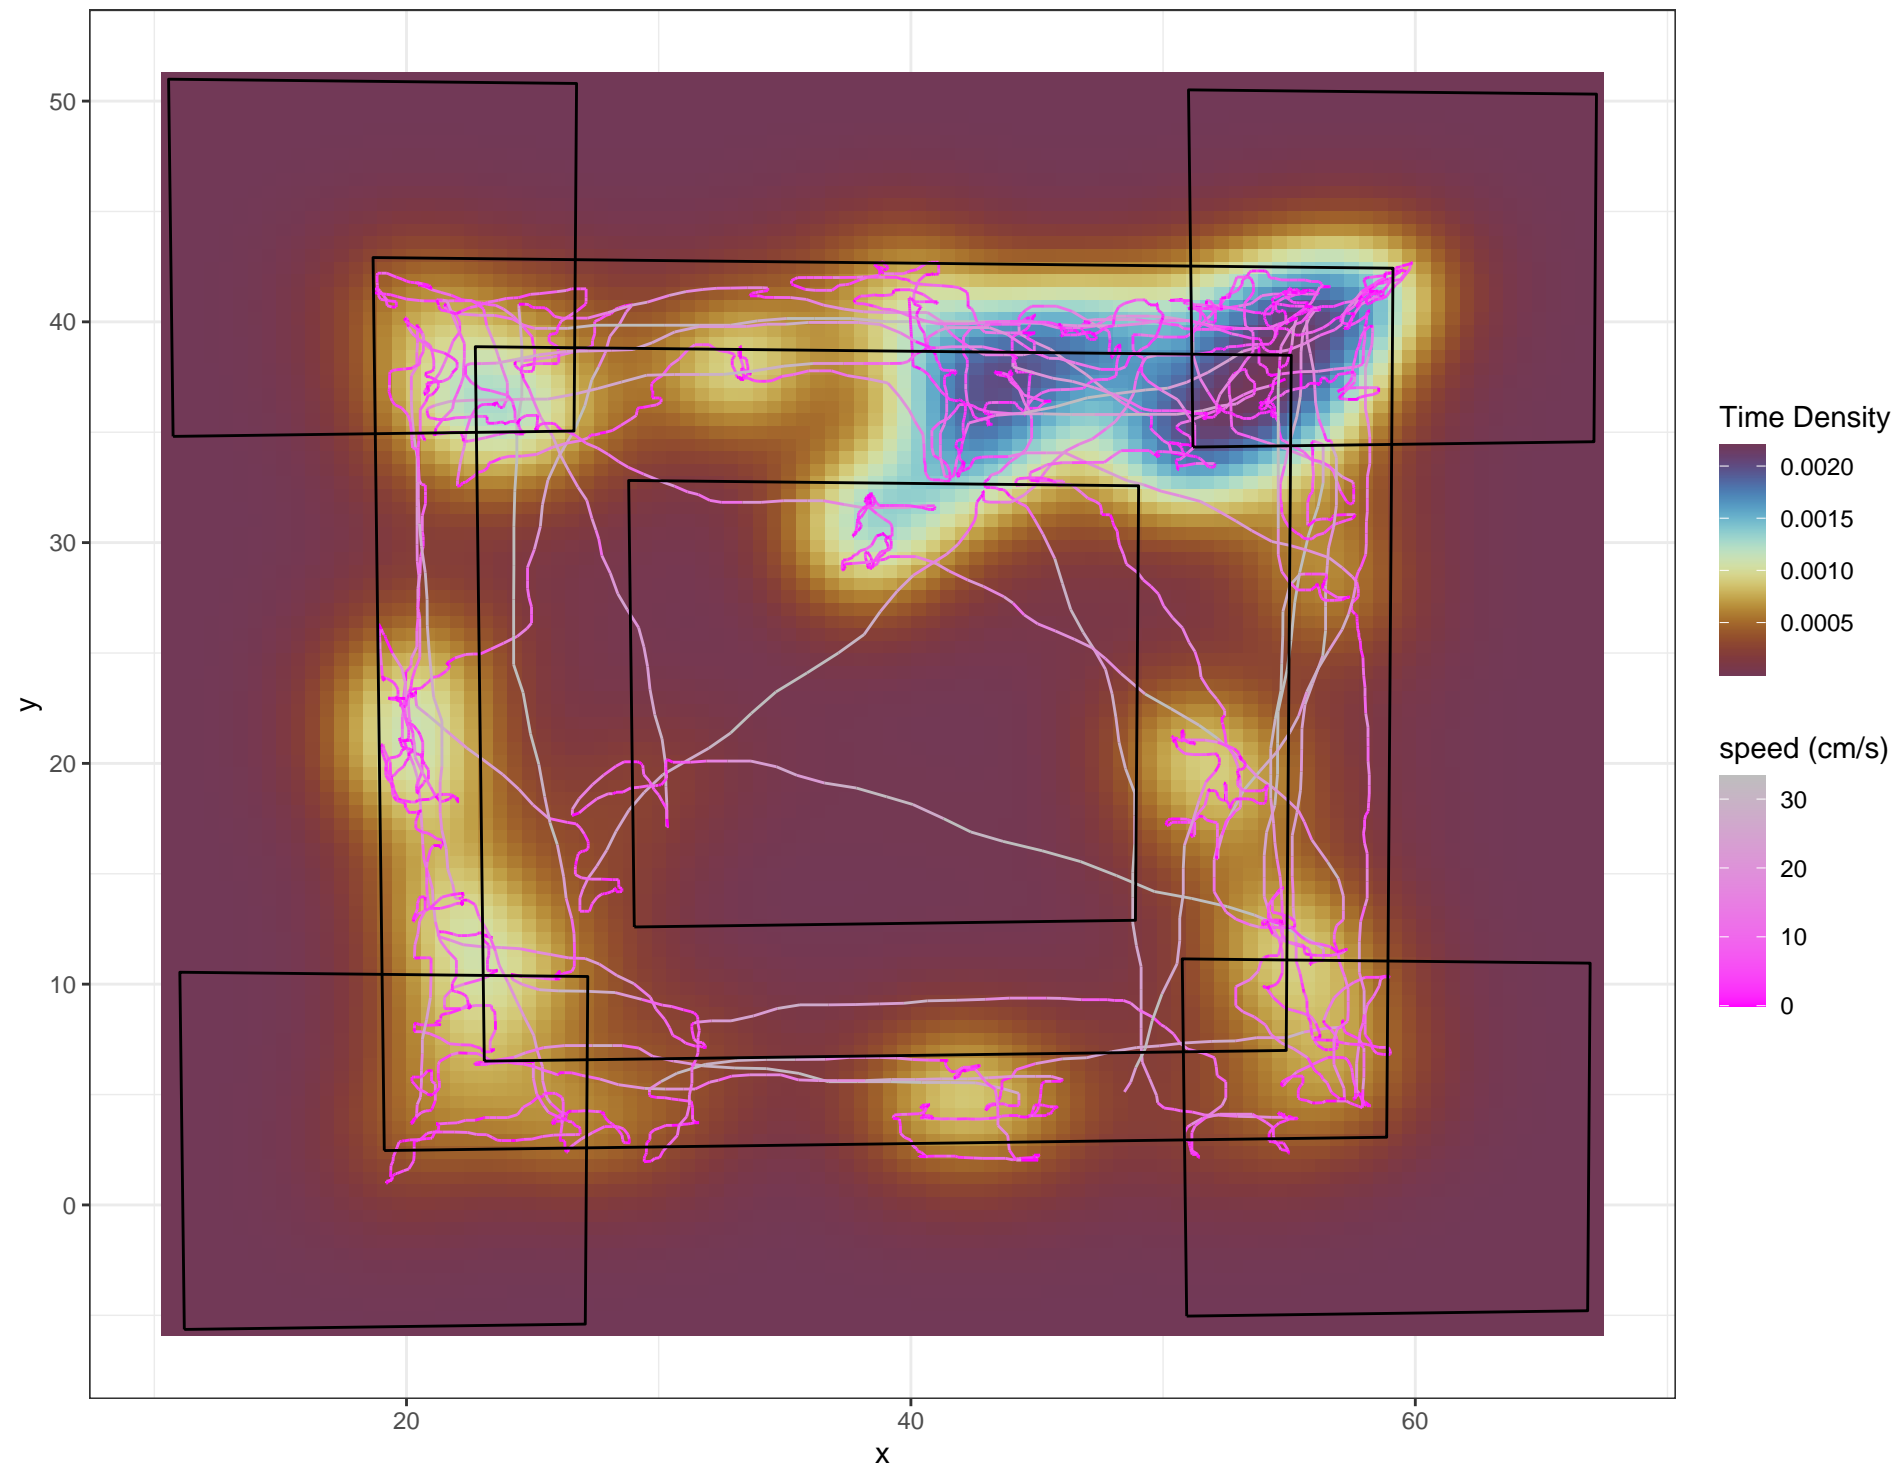

Occiput OF\_top\_DREADD\_40-Clo1DLC\_resnet50\_OpenFieldDec23shuffle1\_600000\_filtered.csv

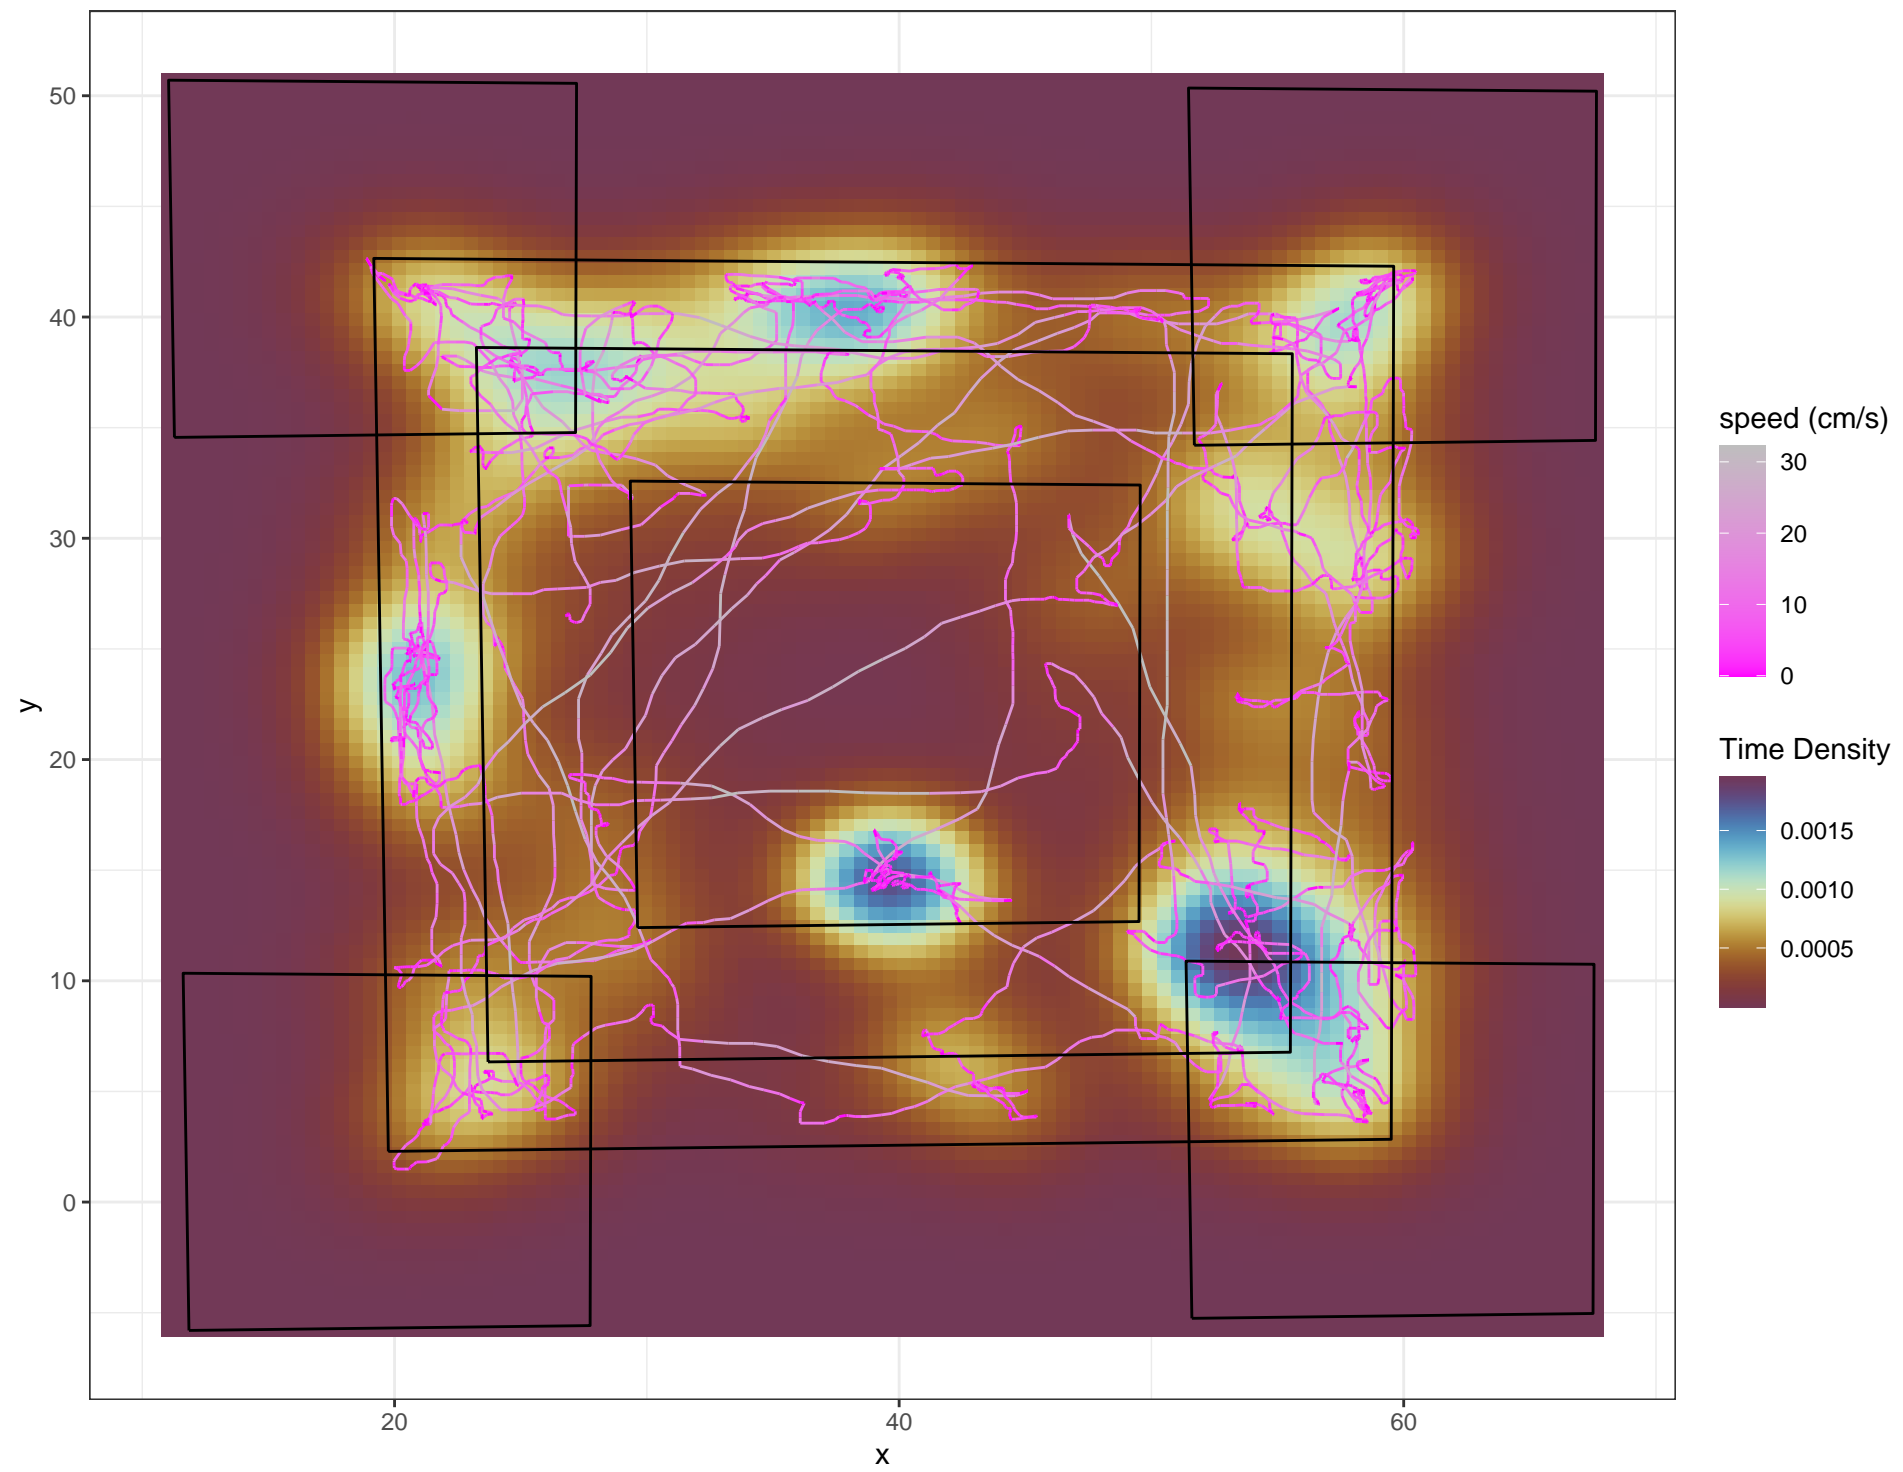

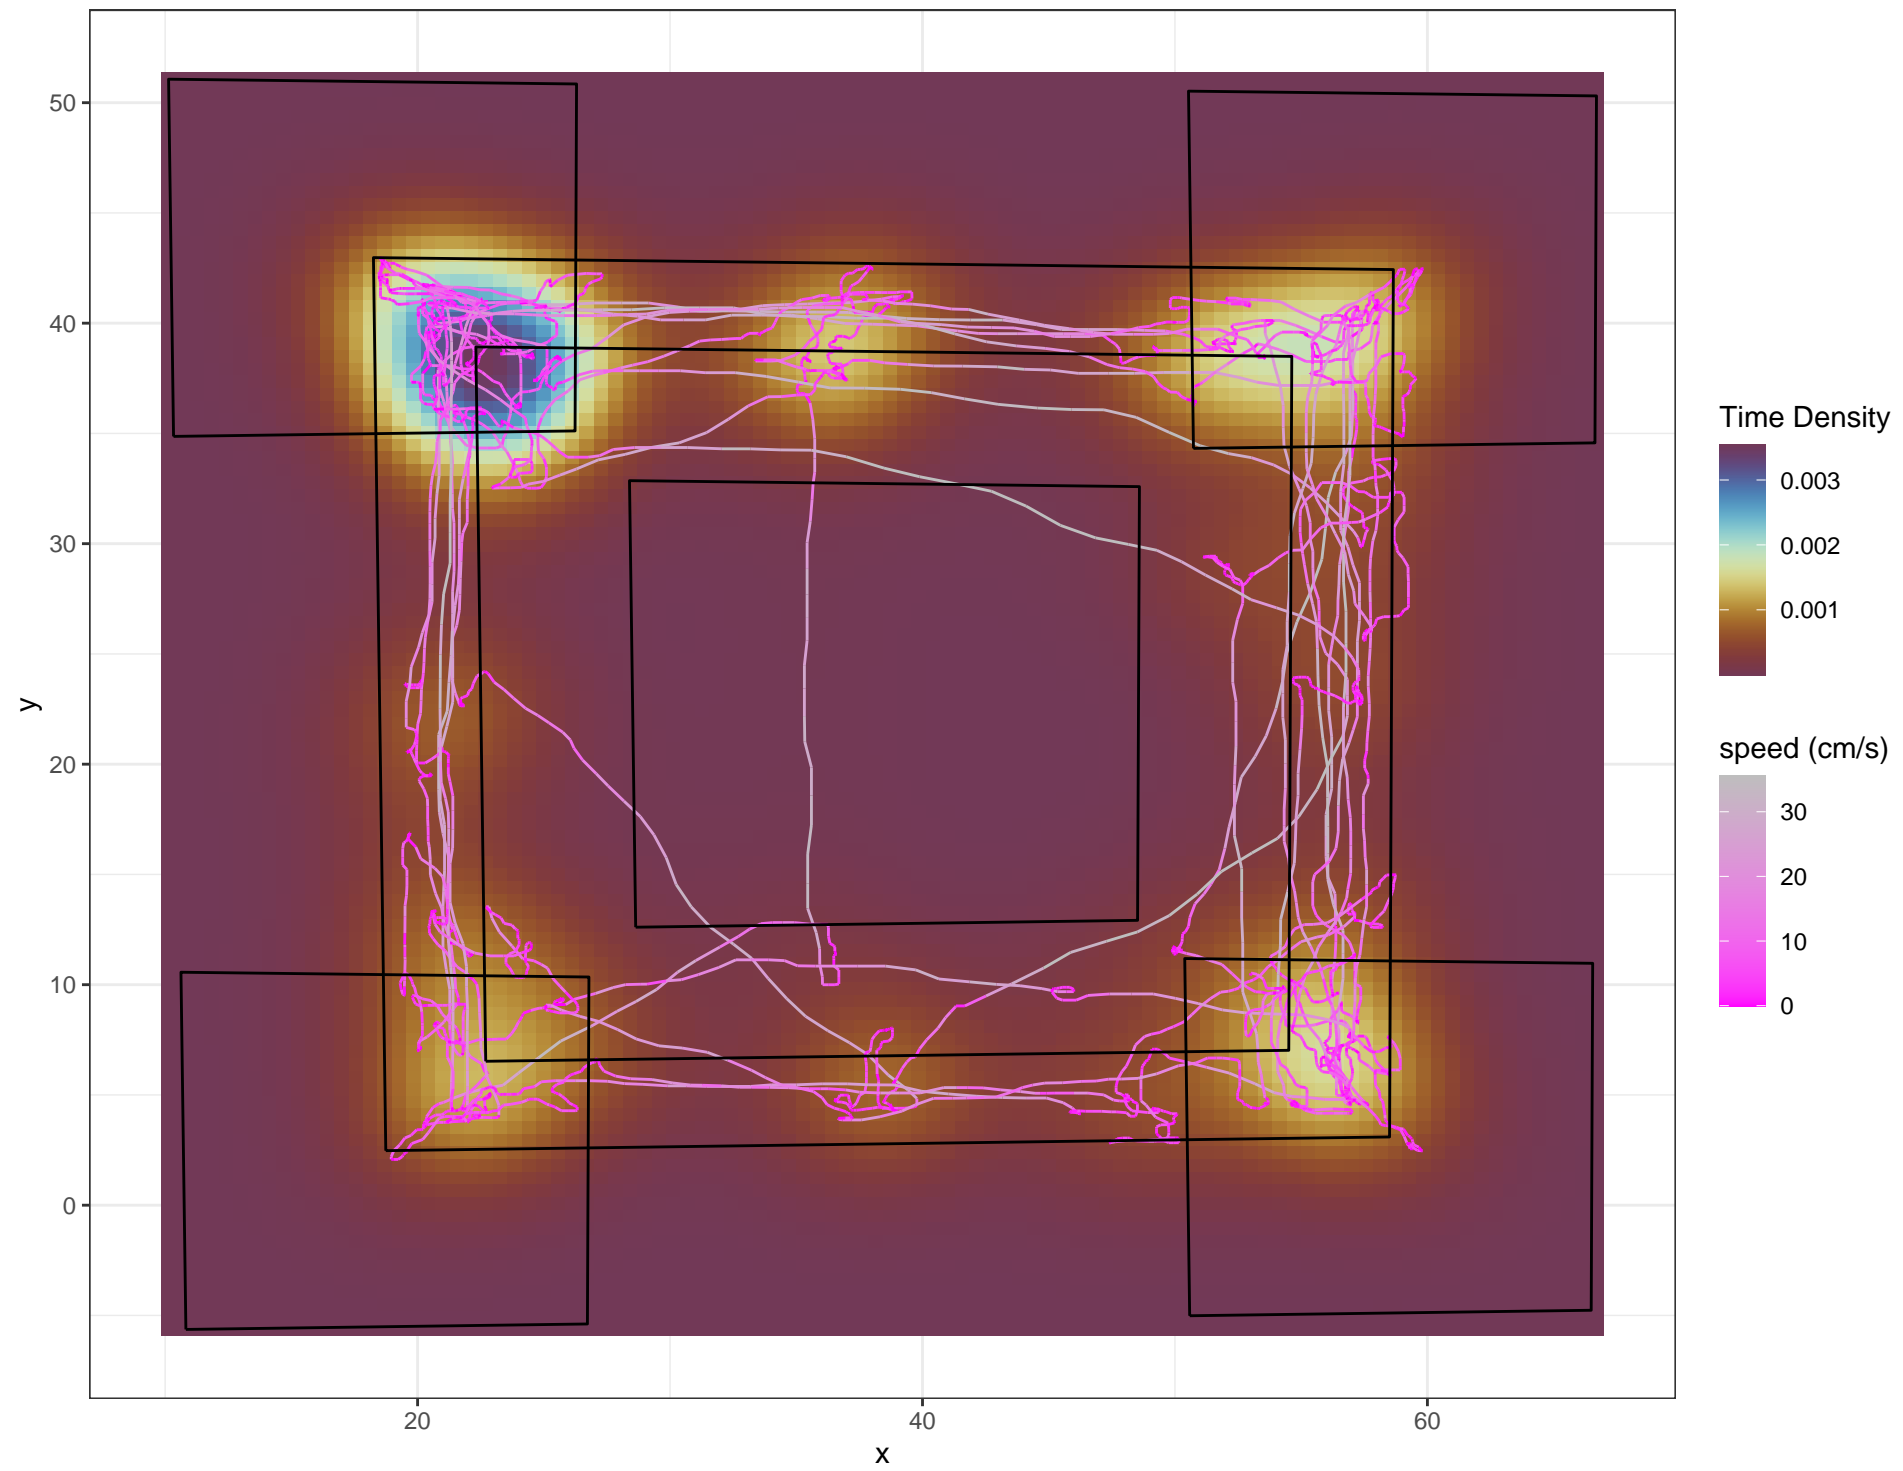



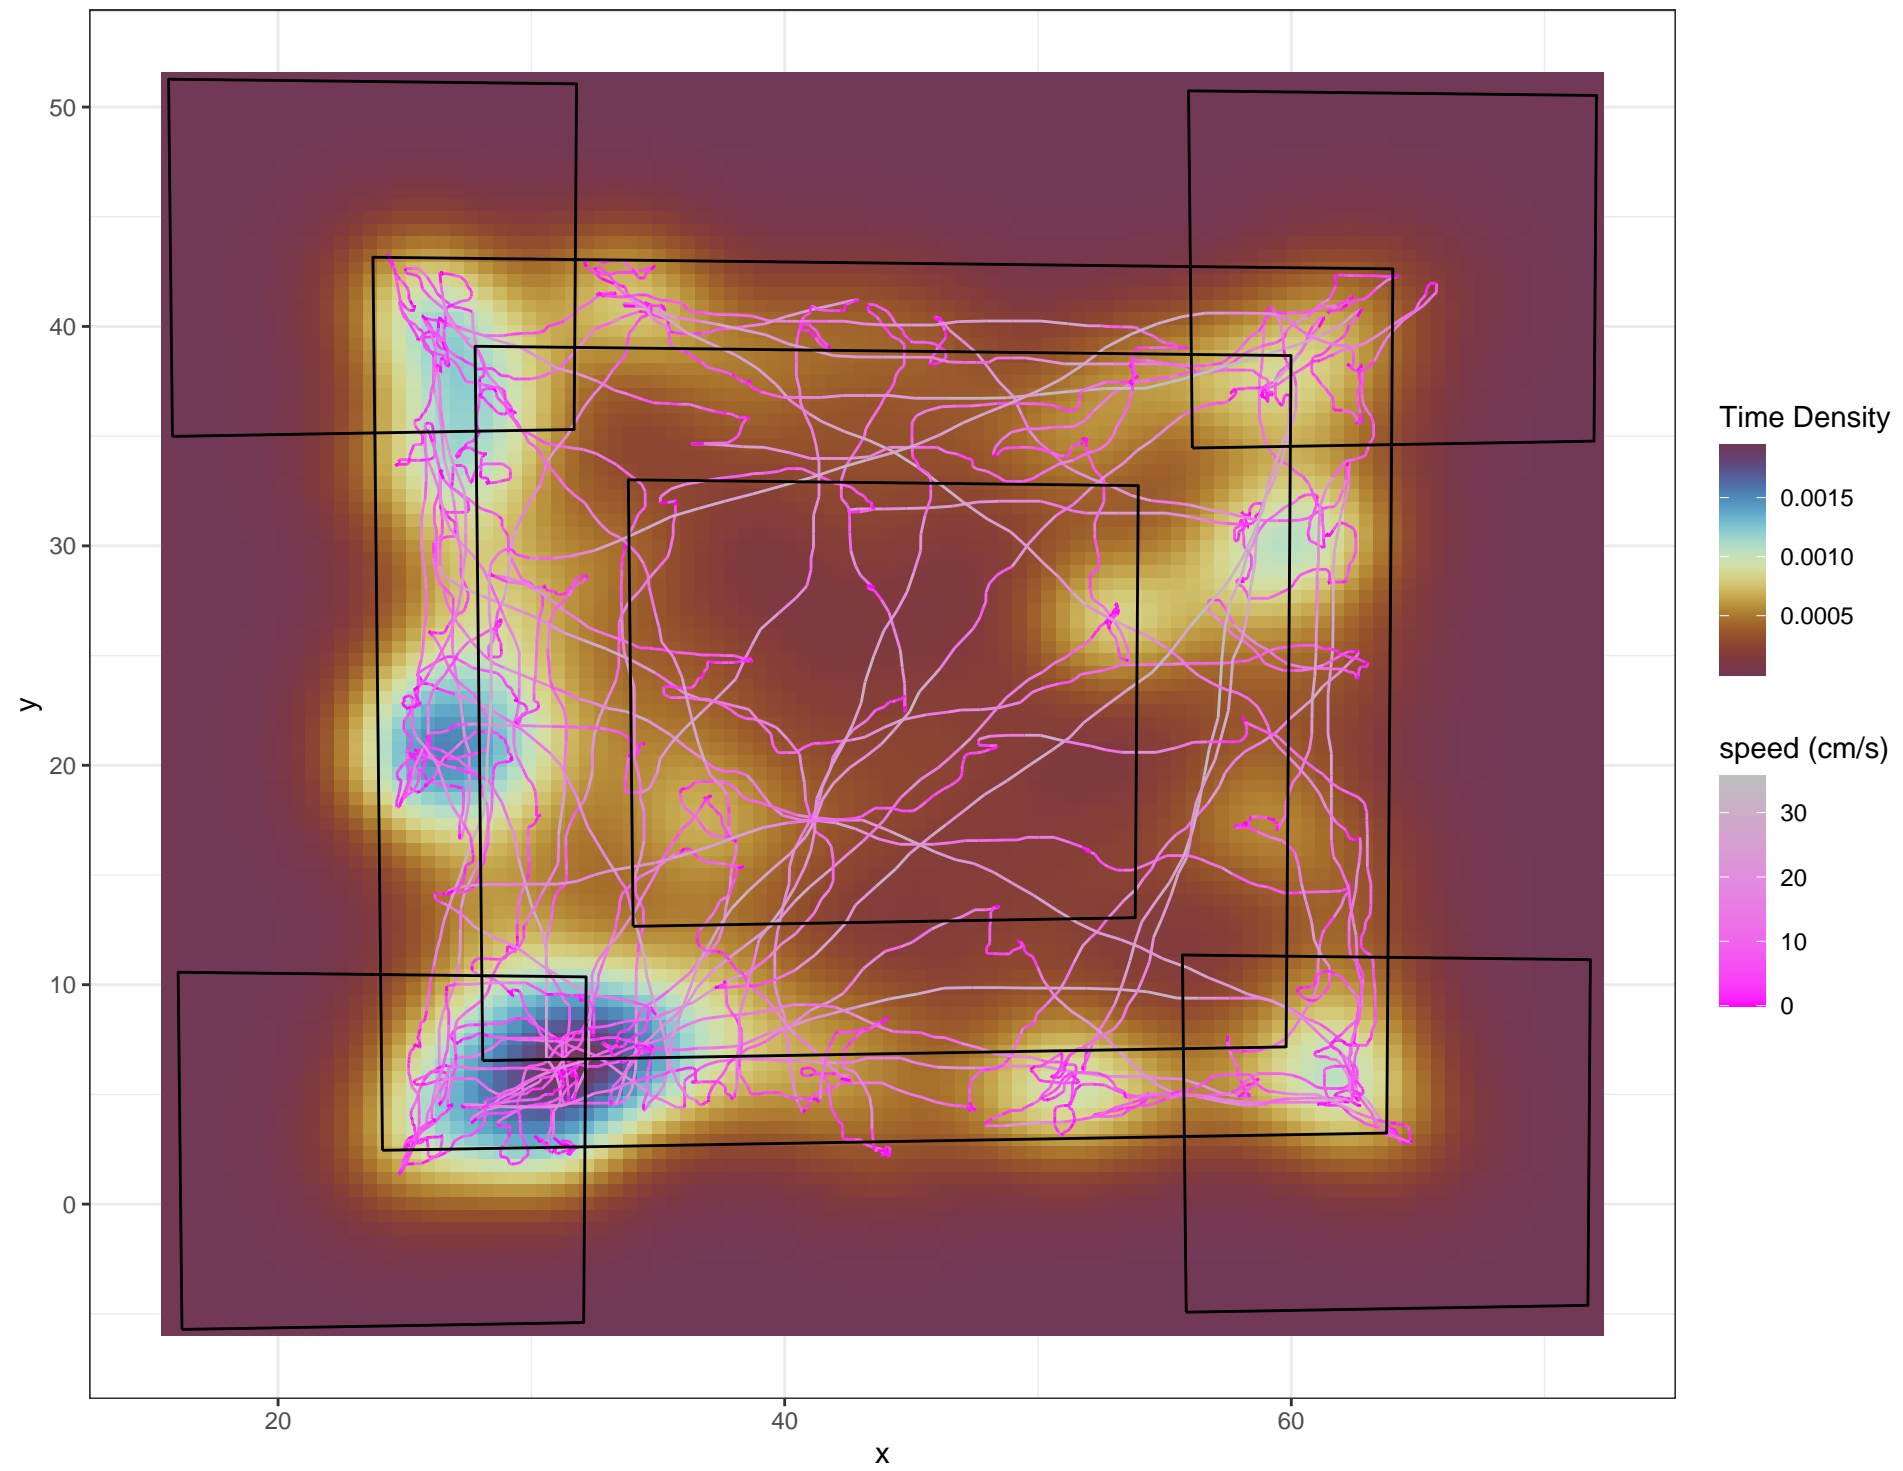

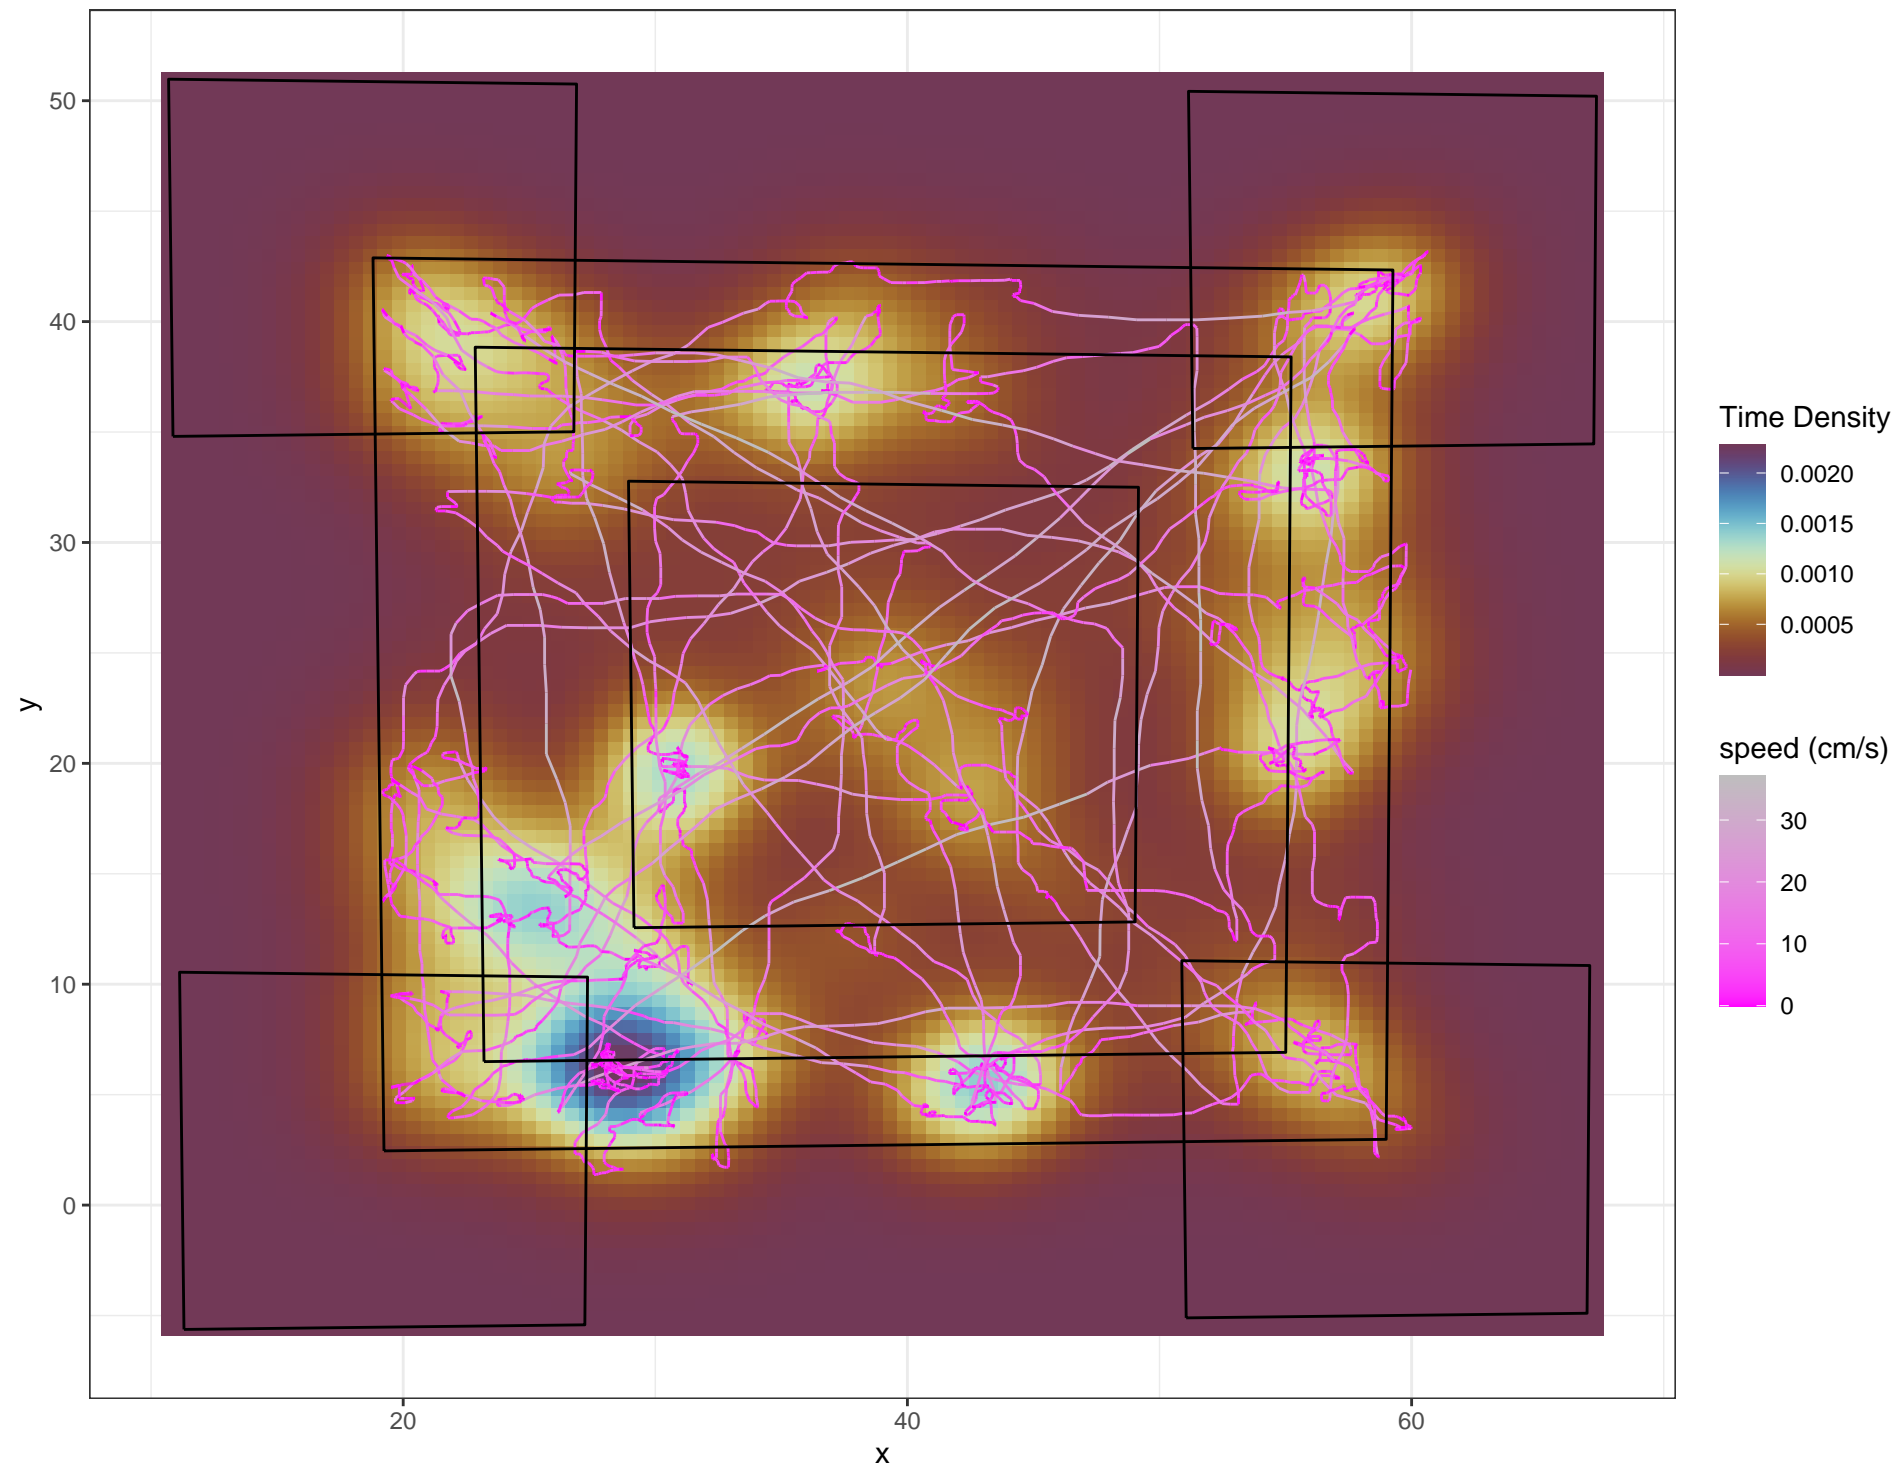

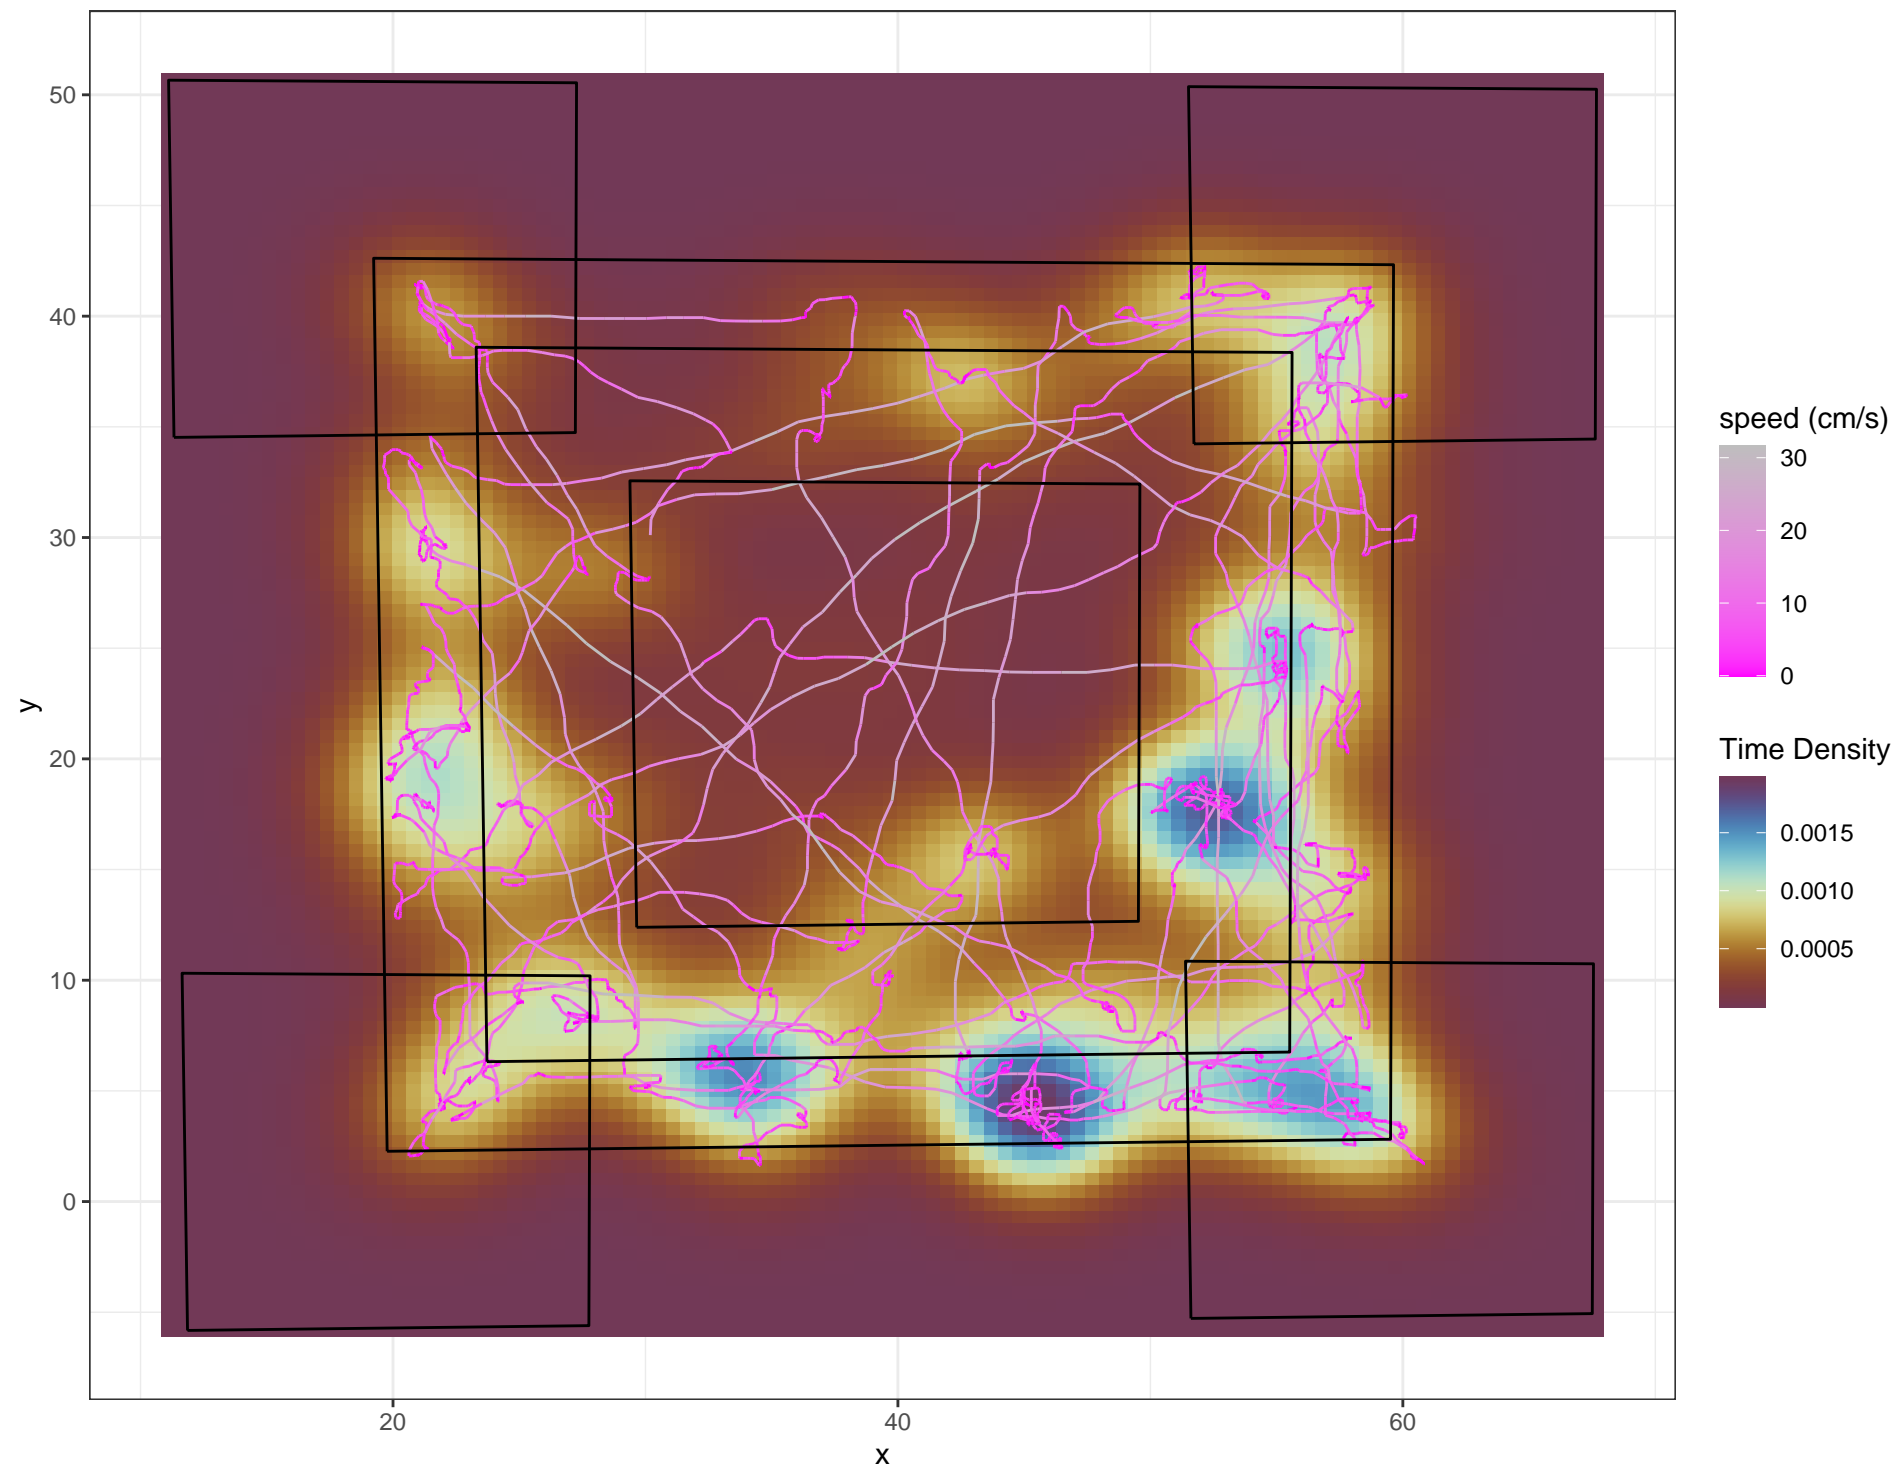

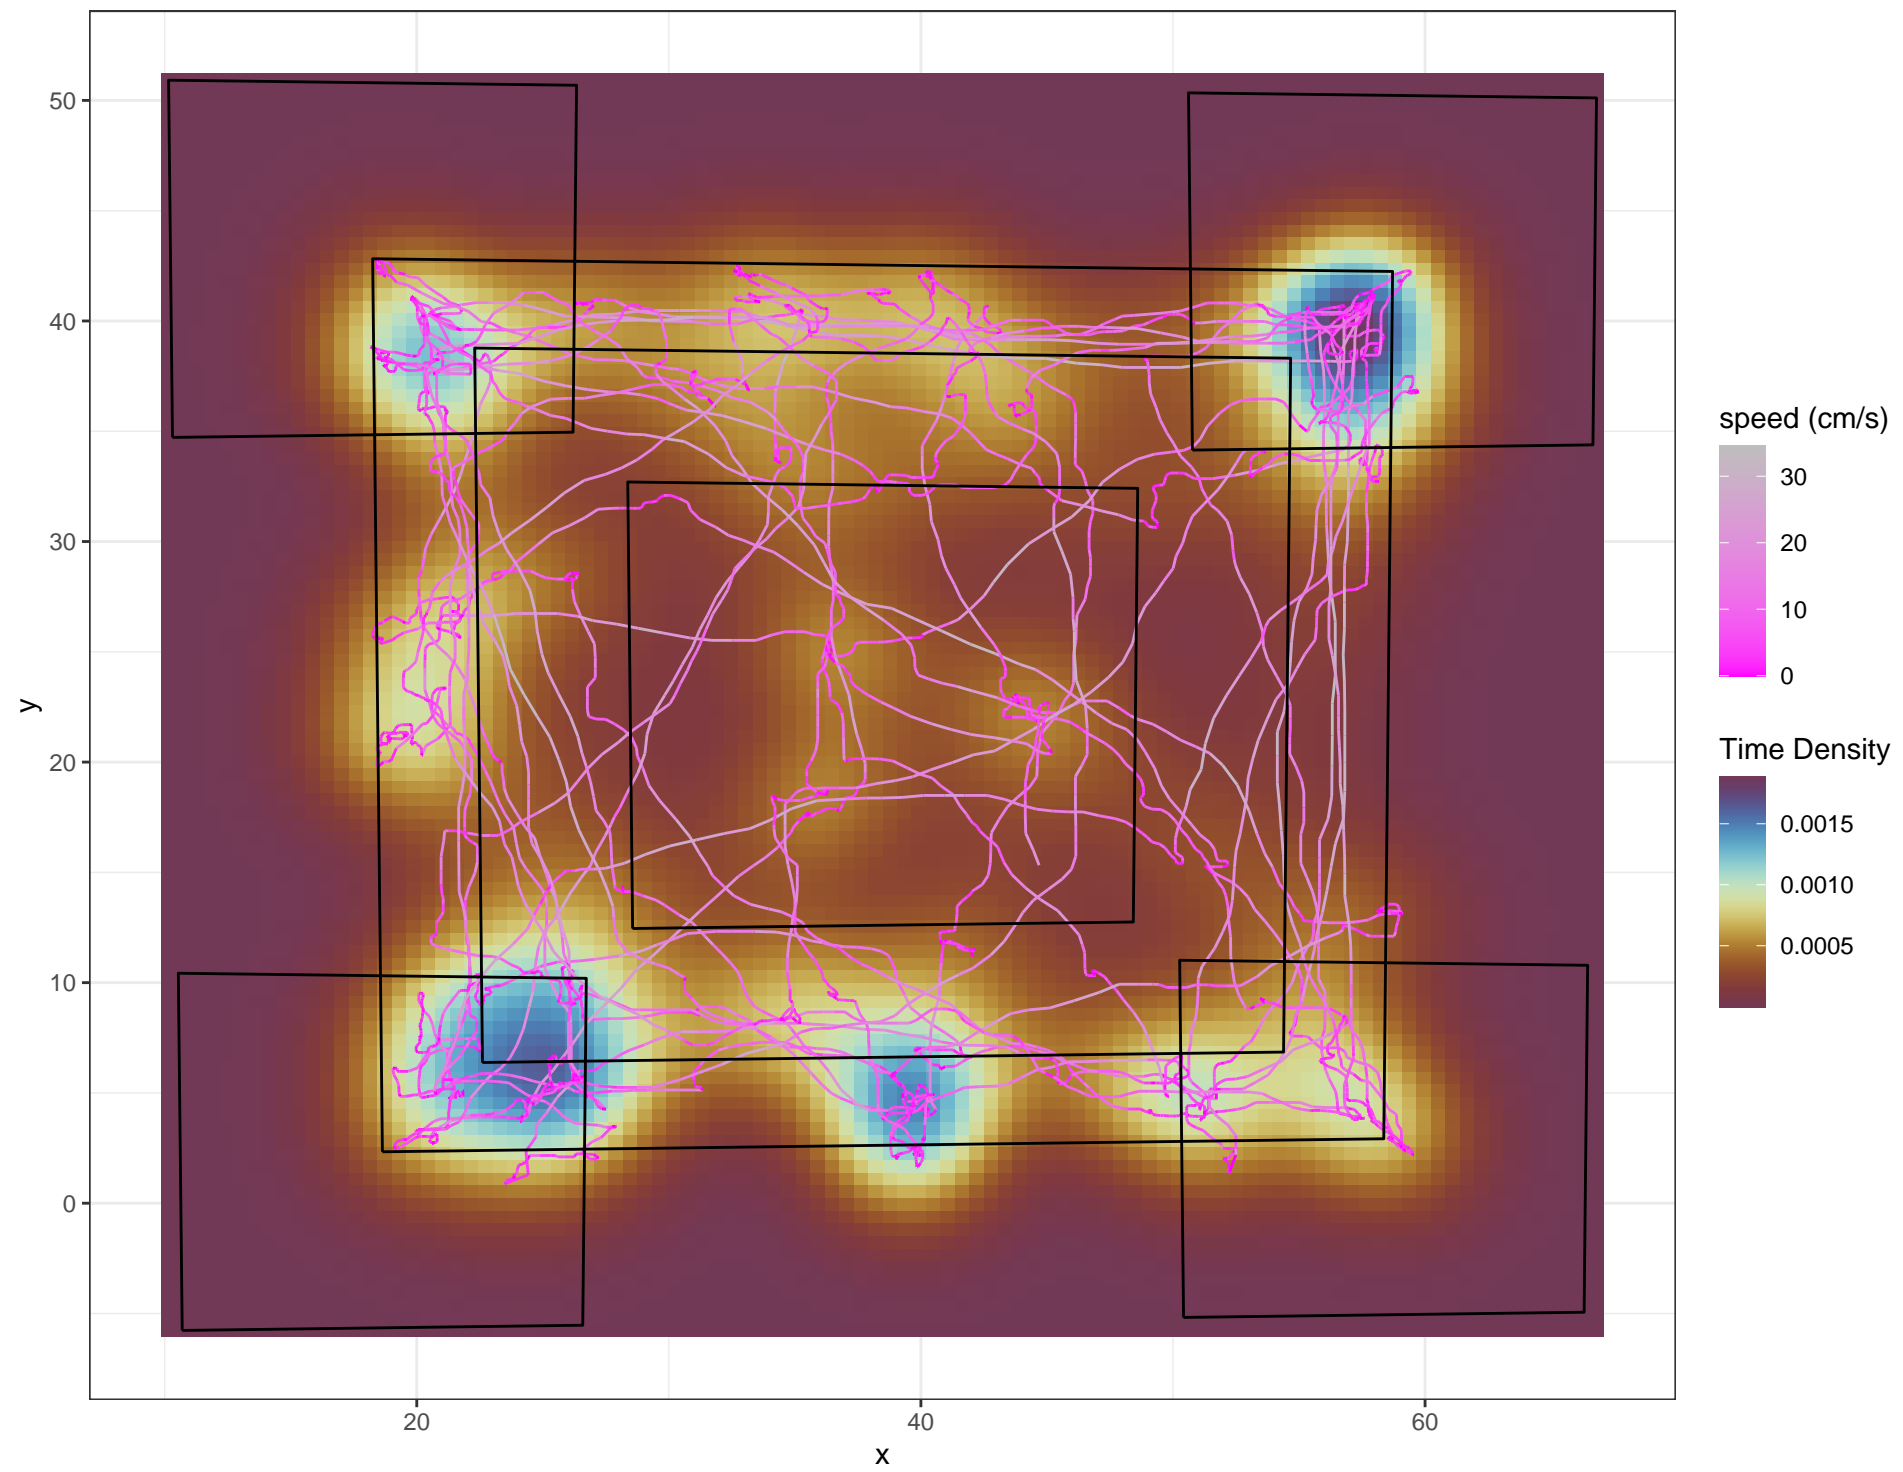

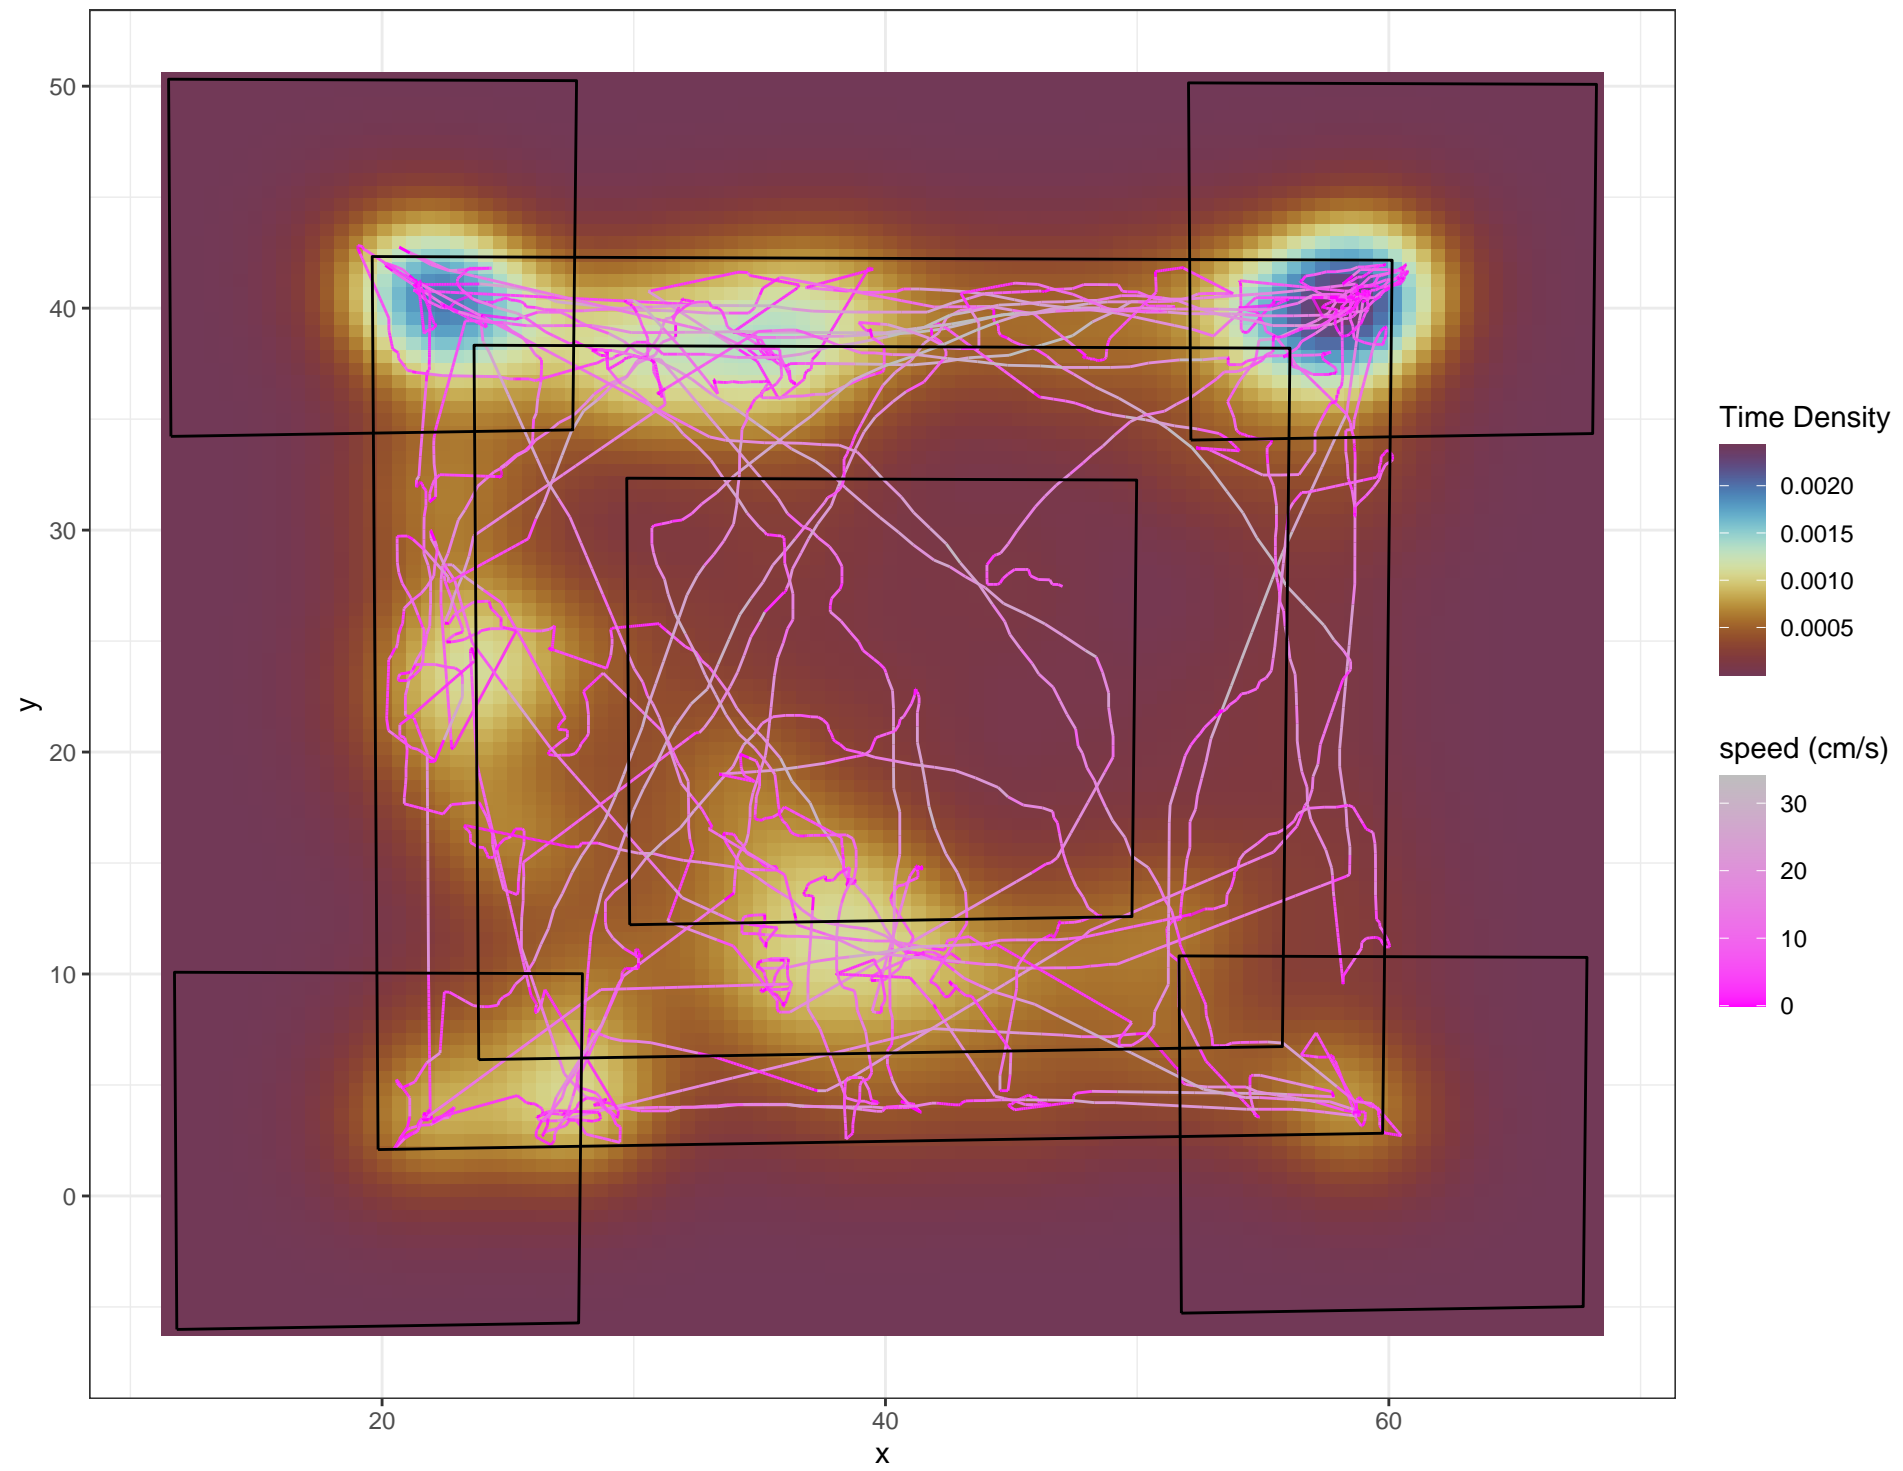

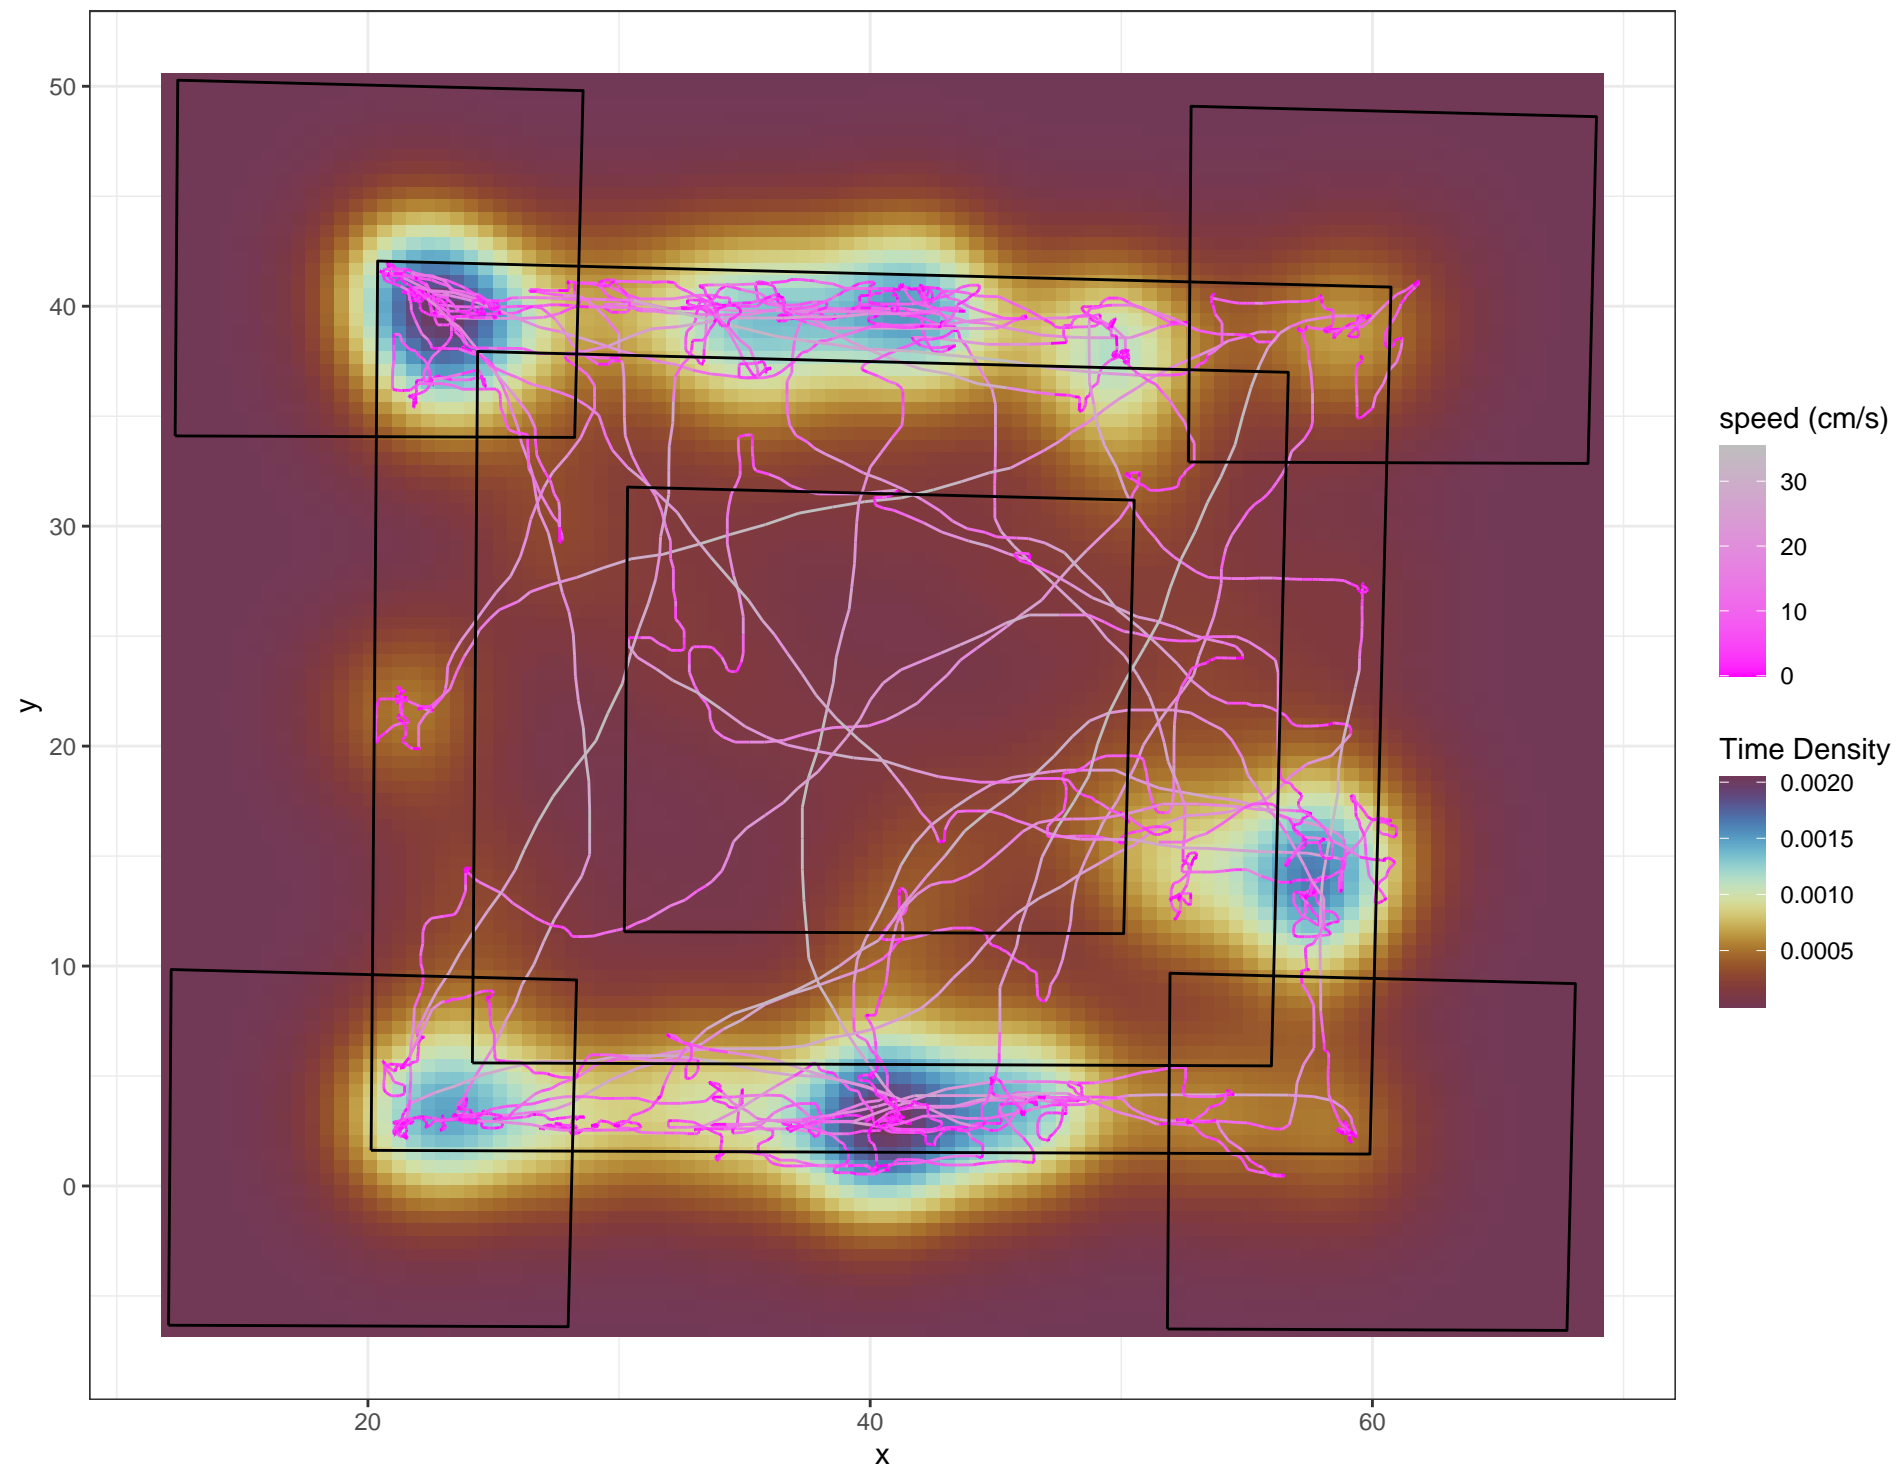

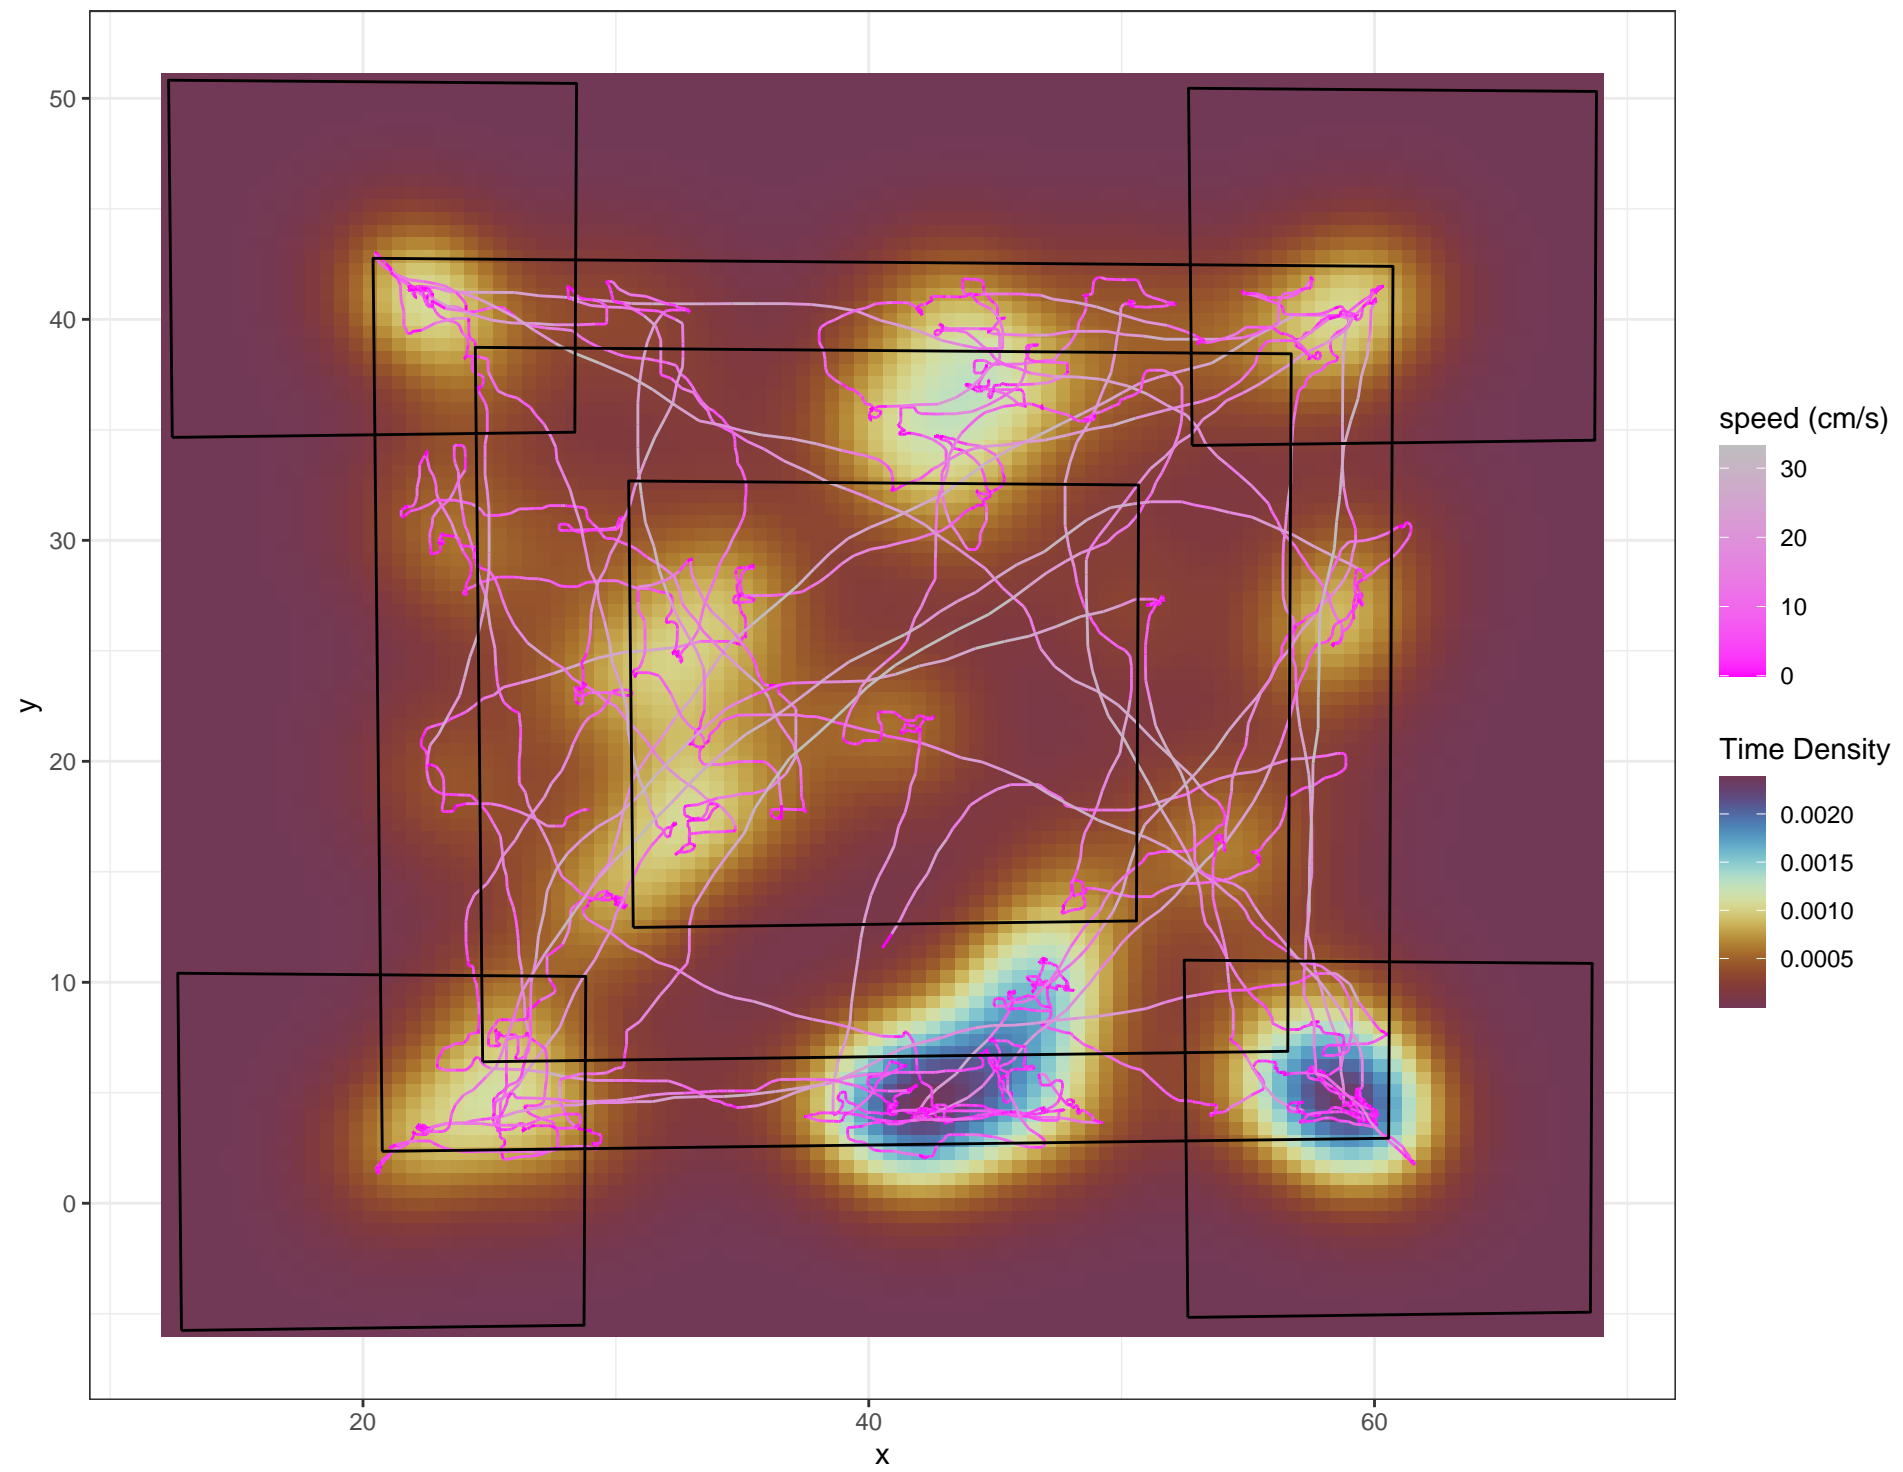

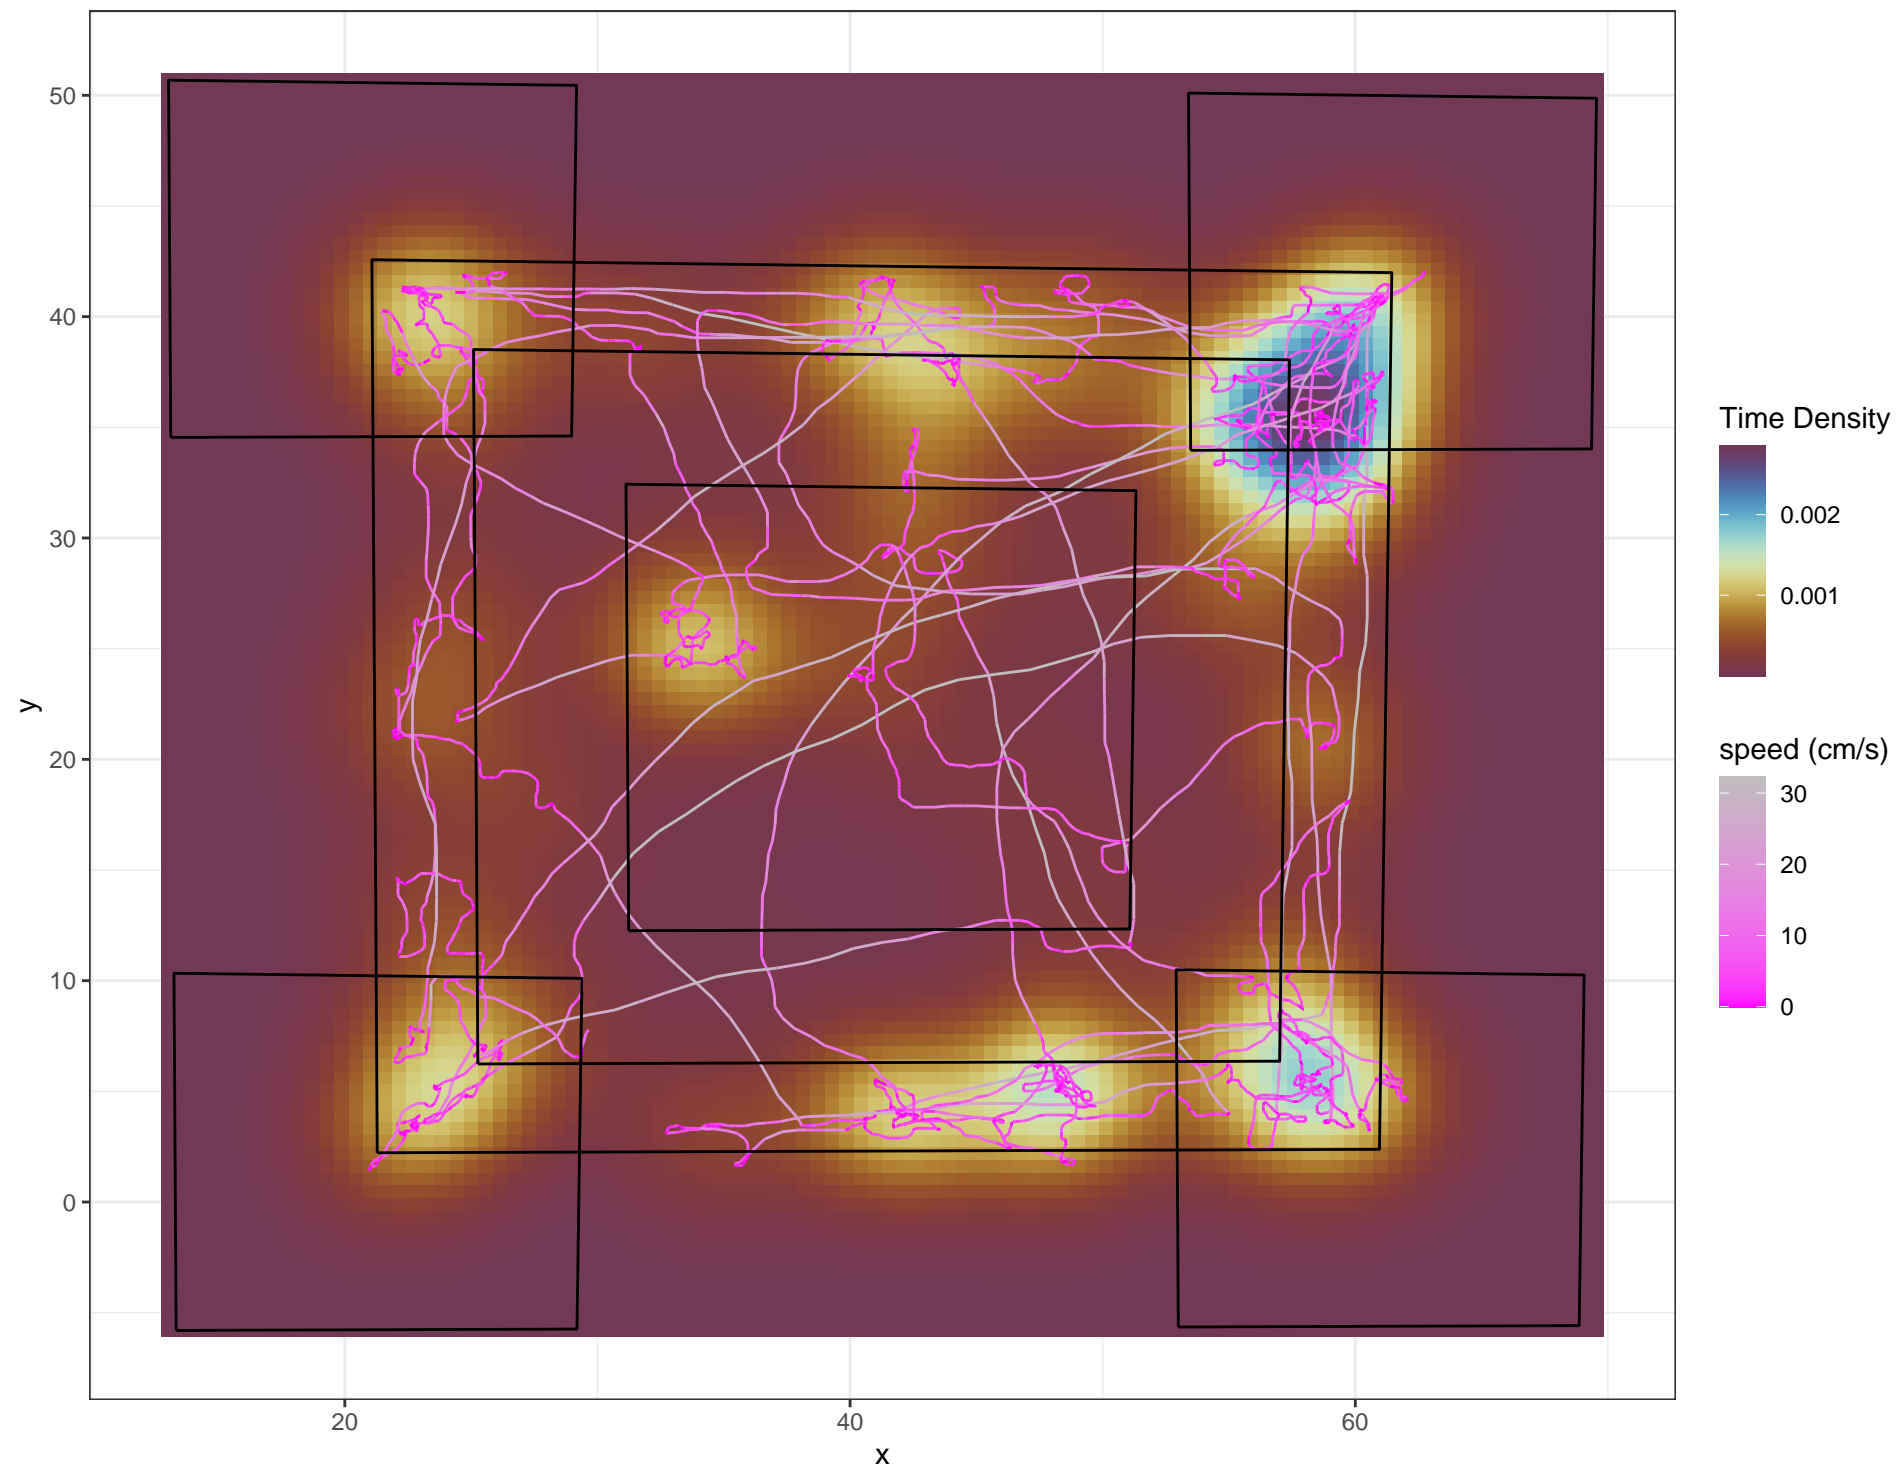



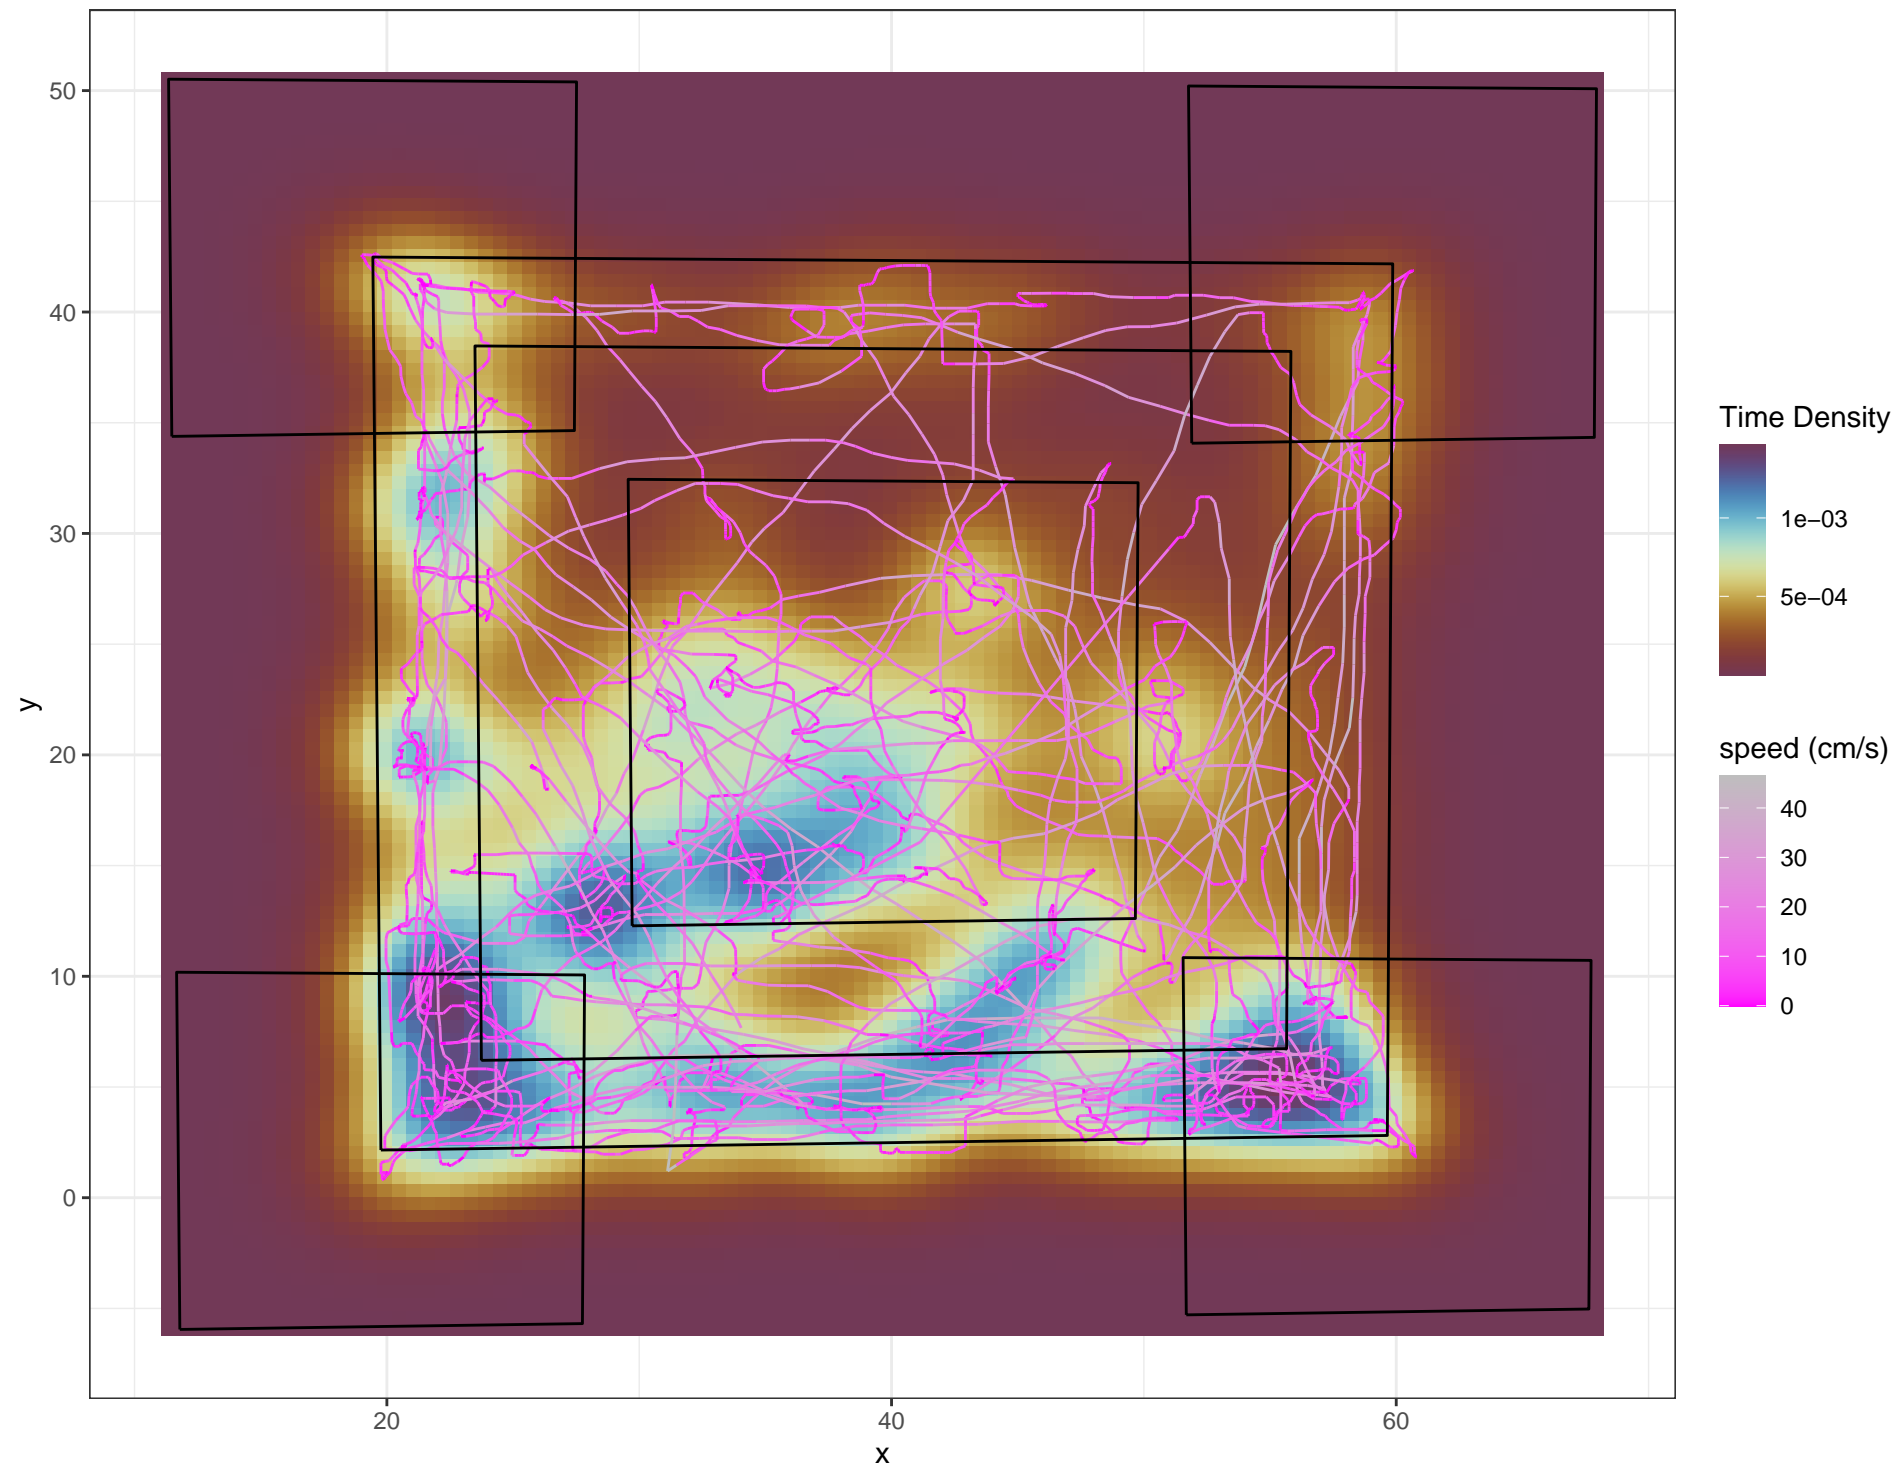

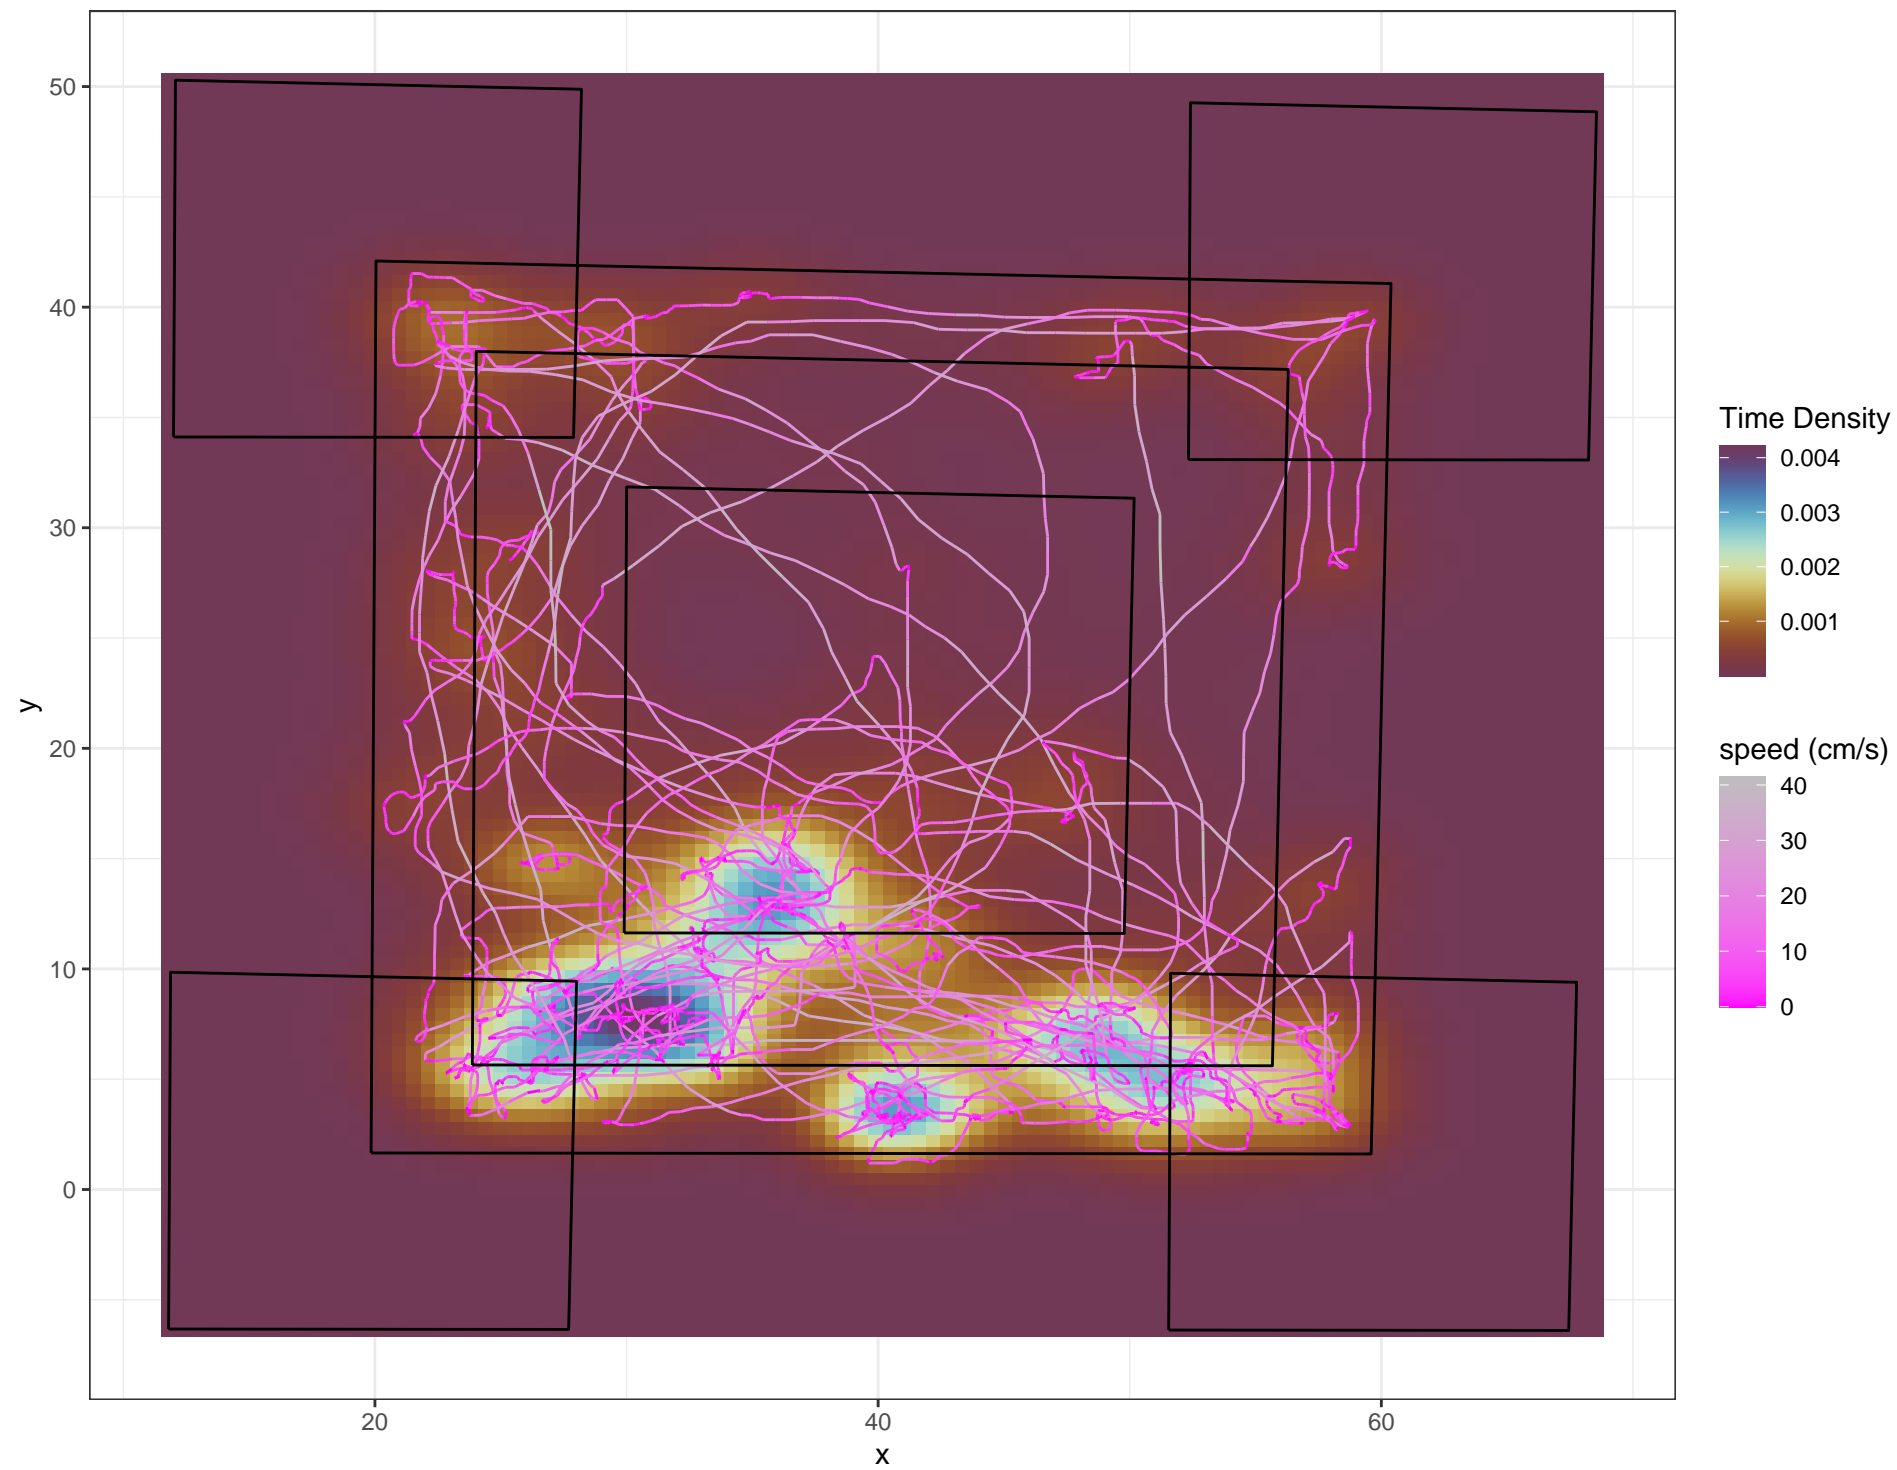

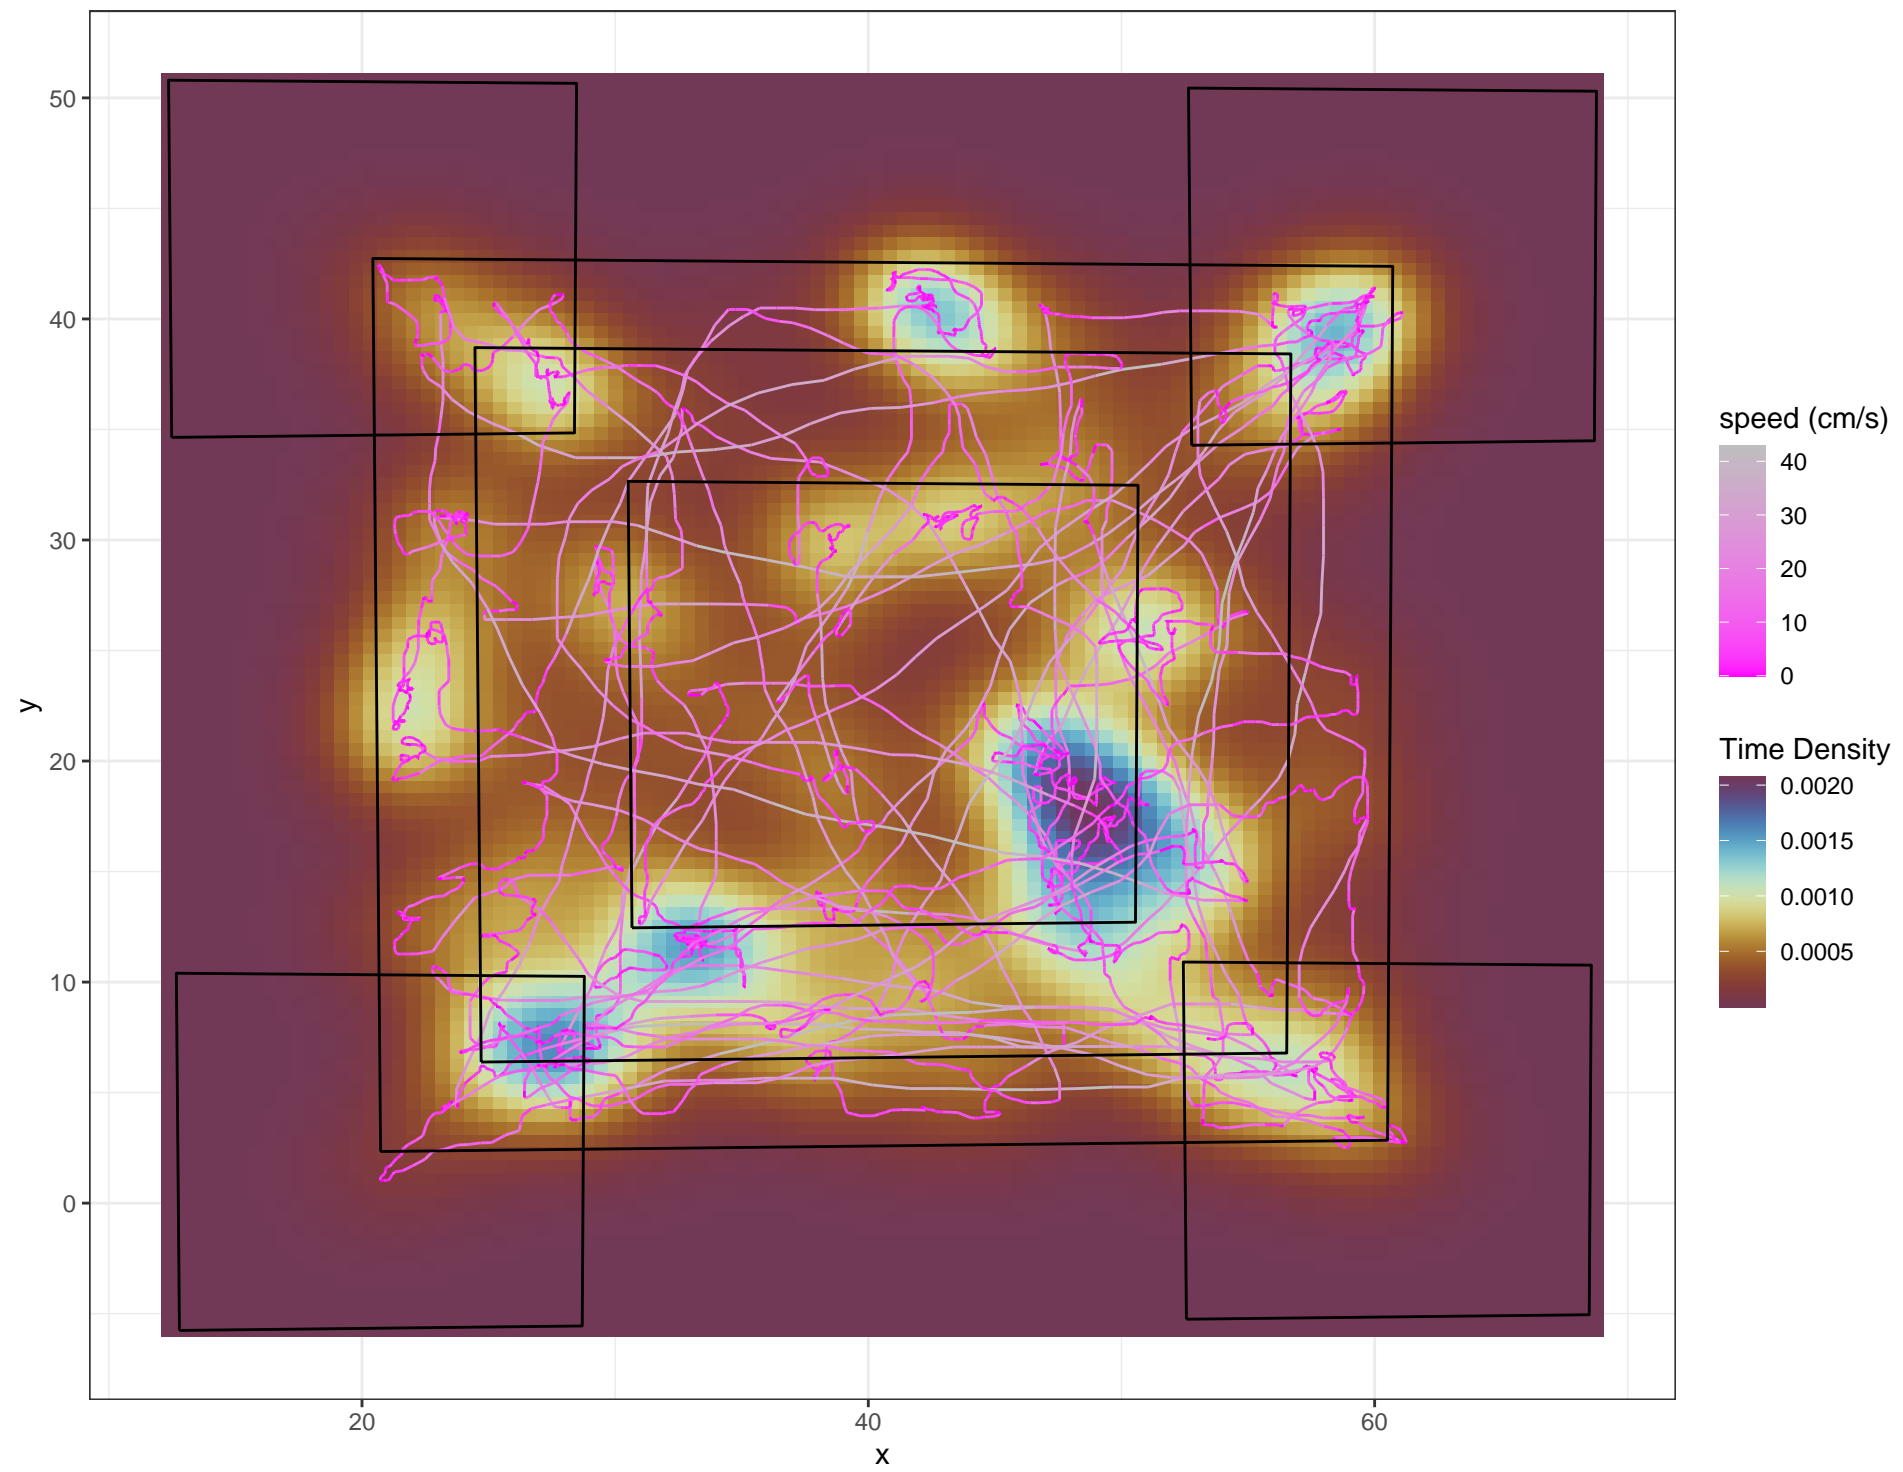

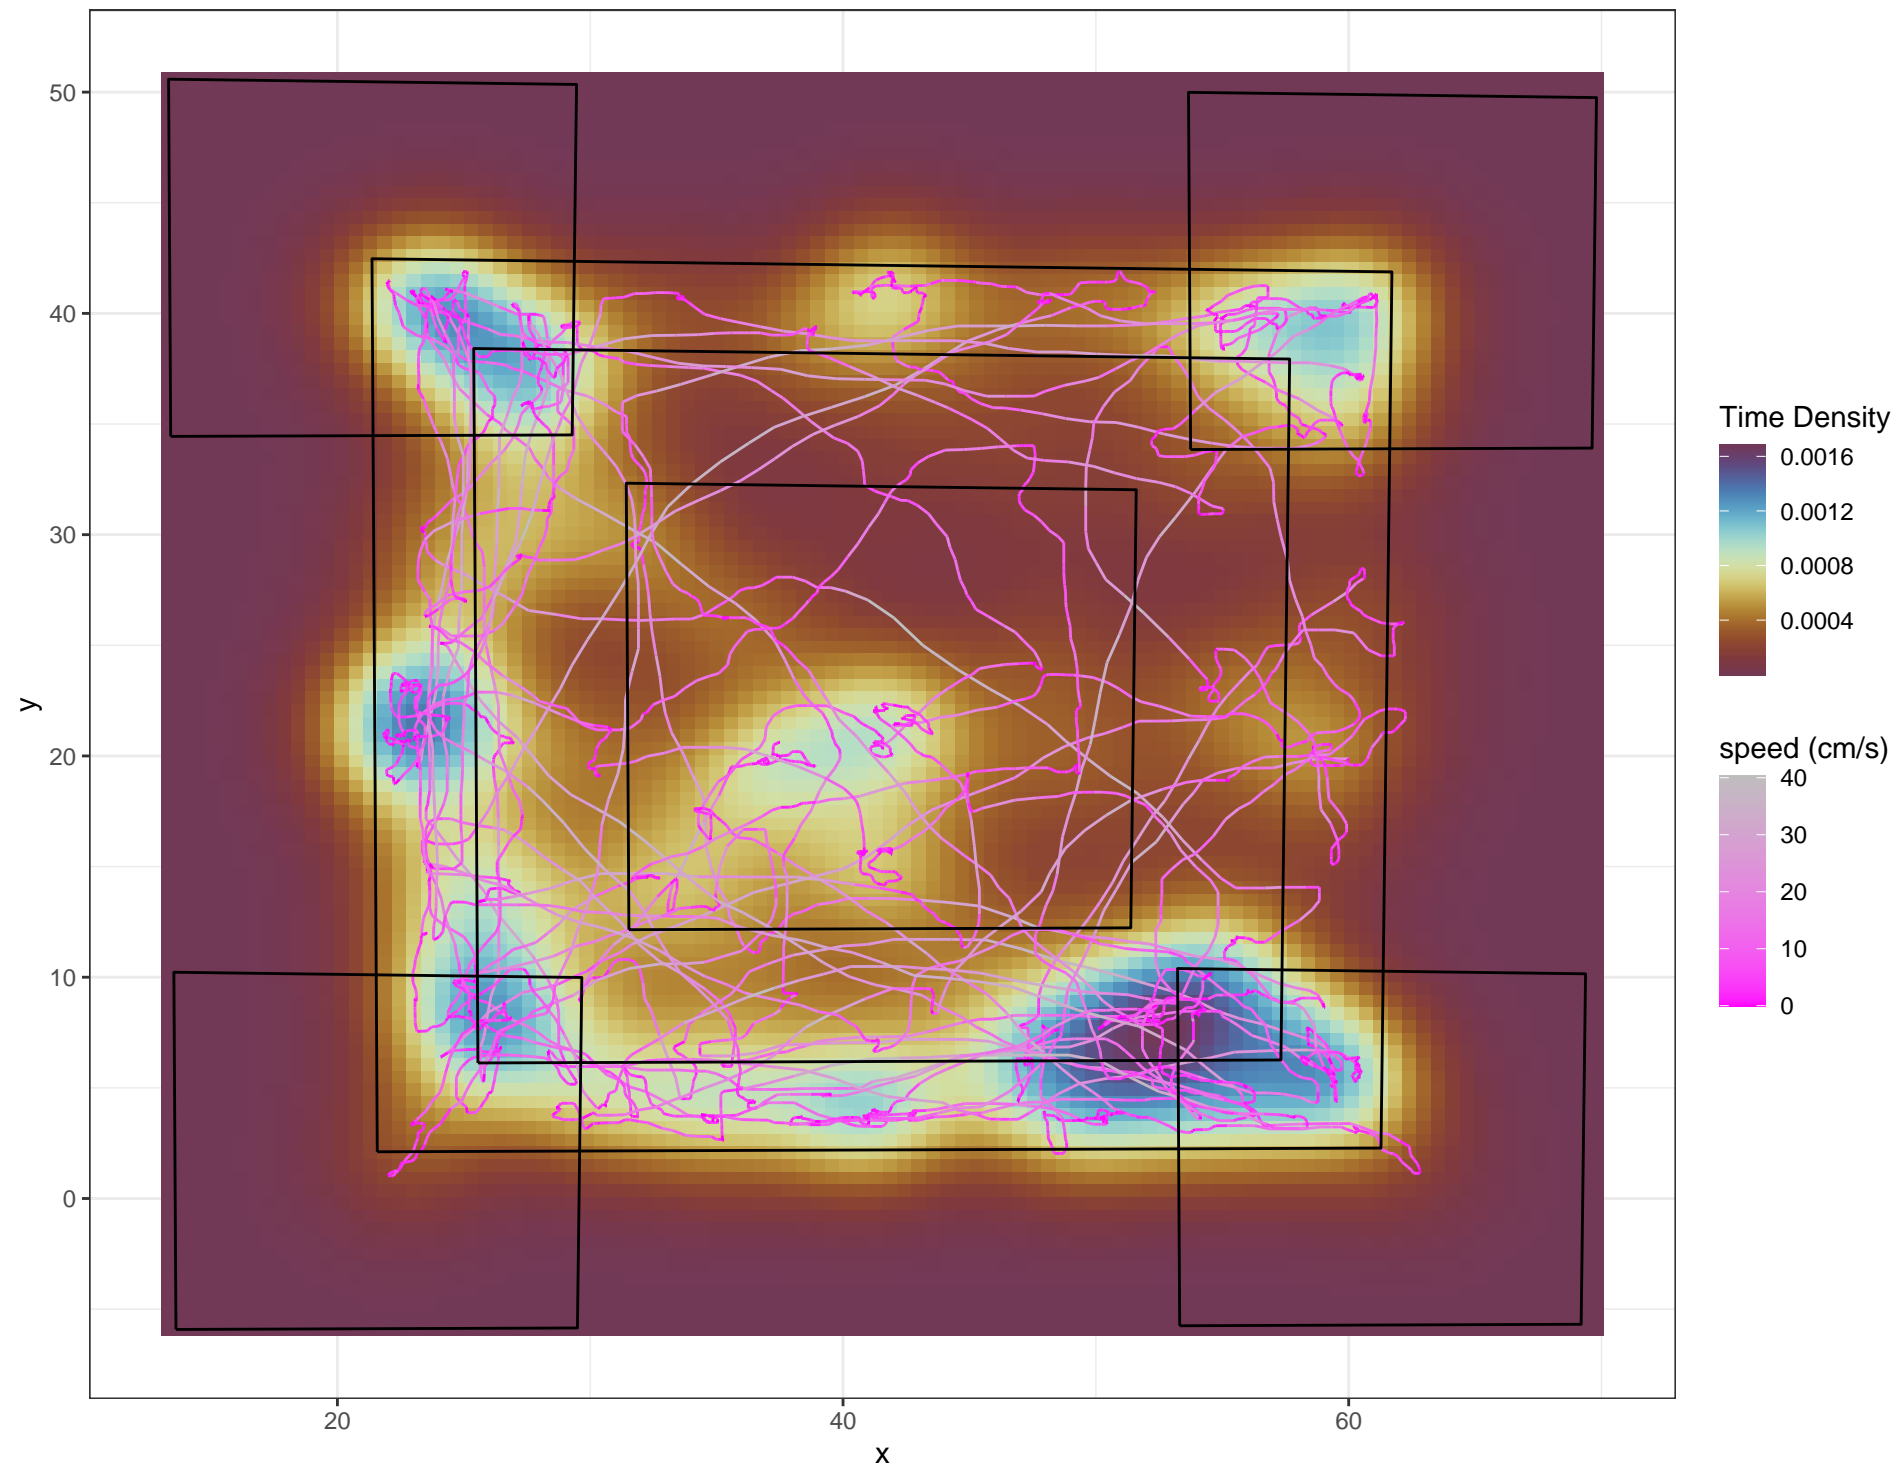

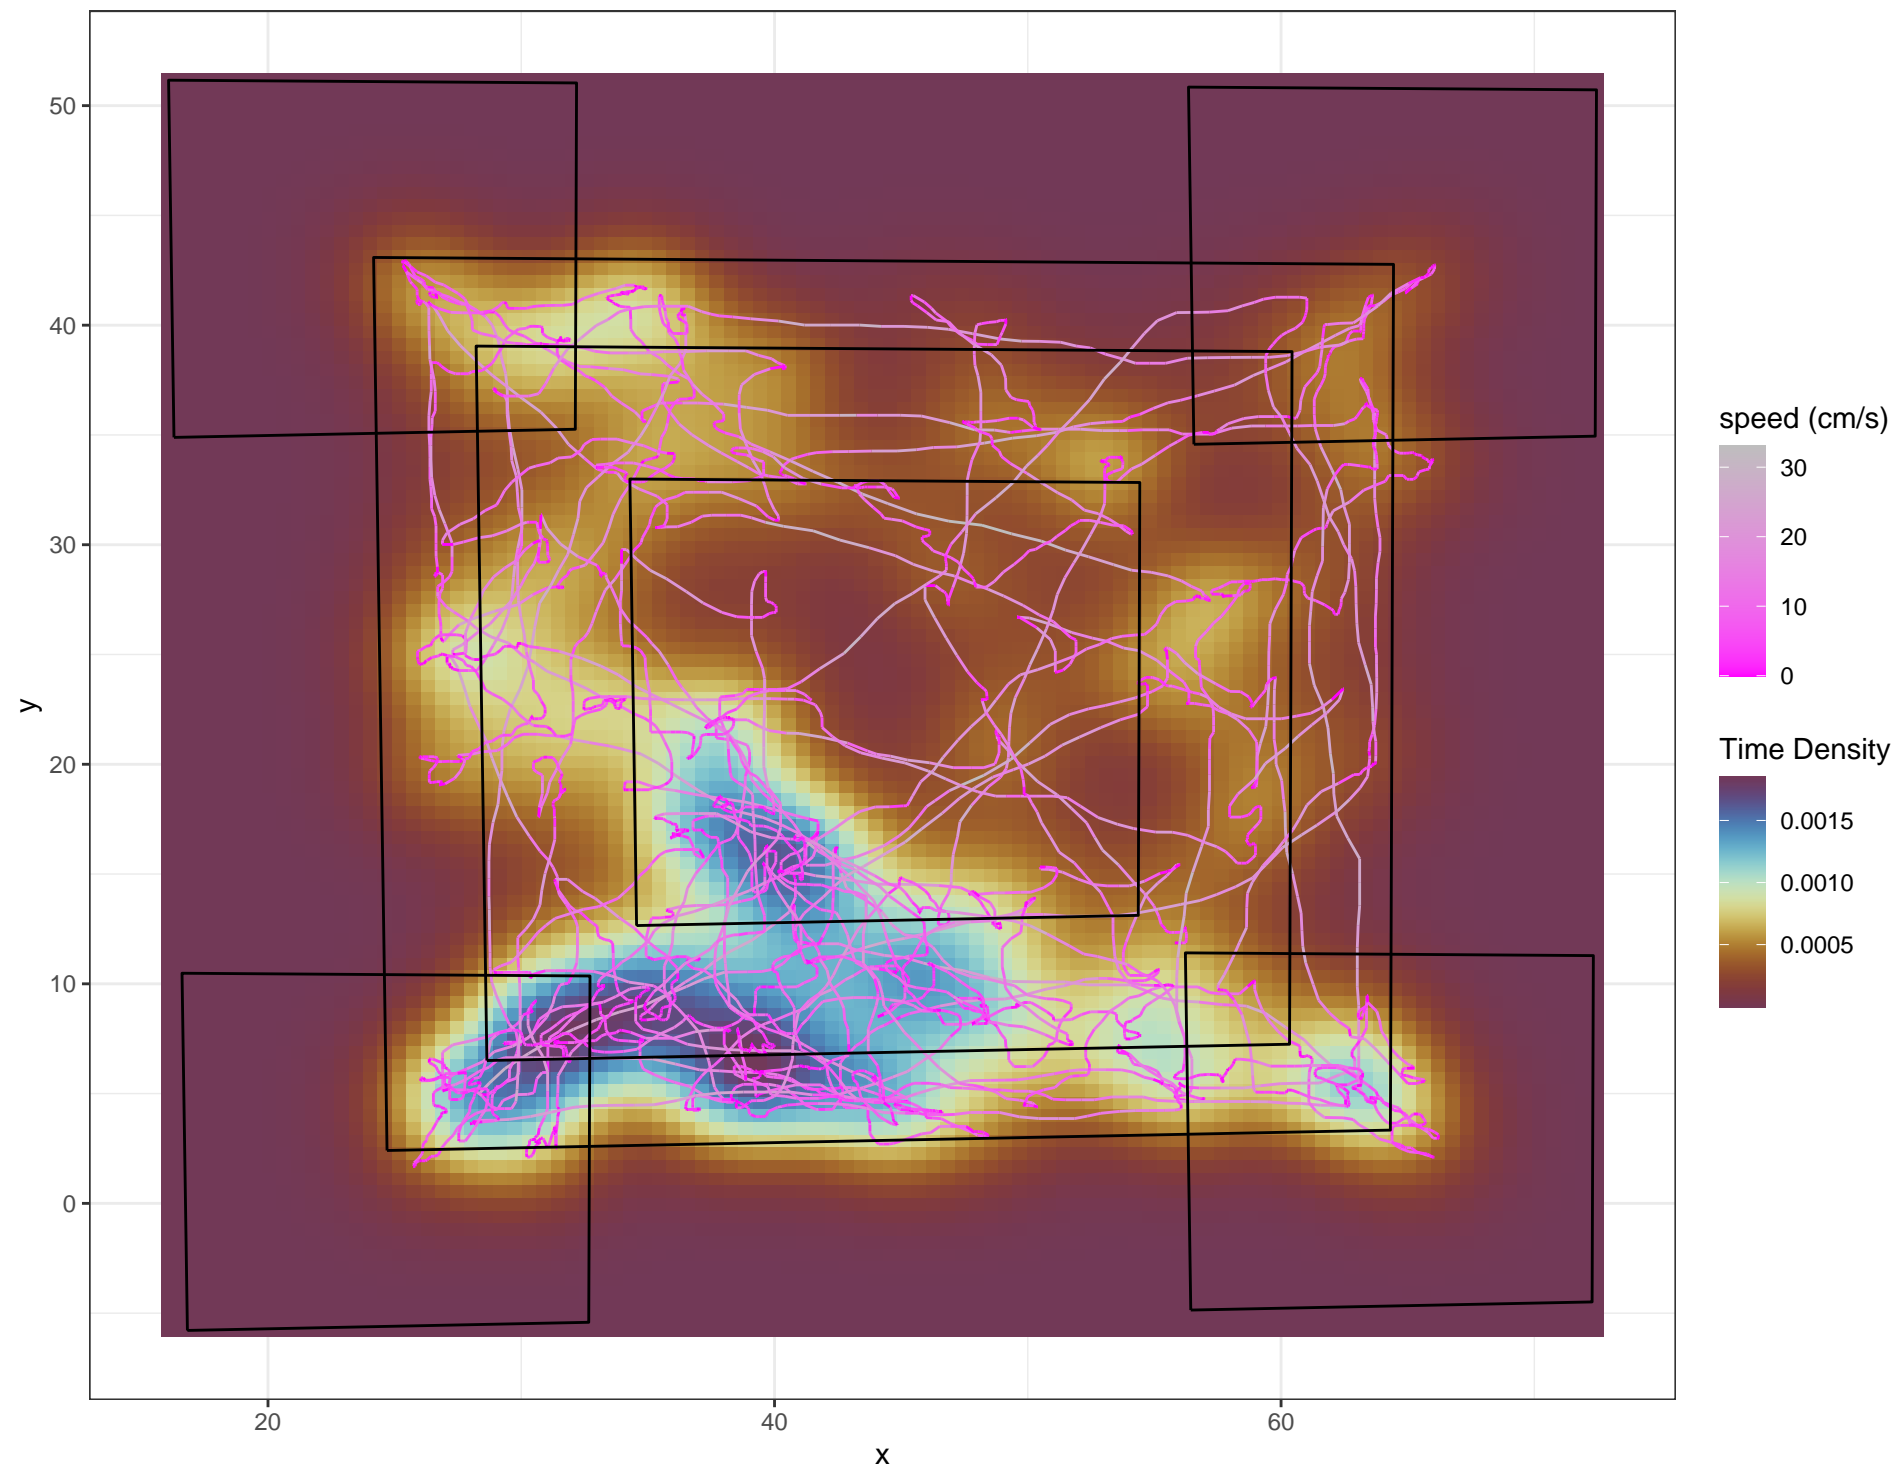

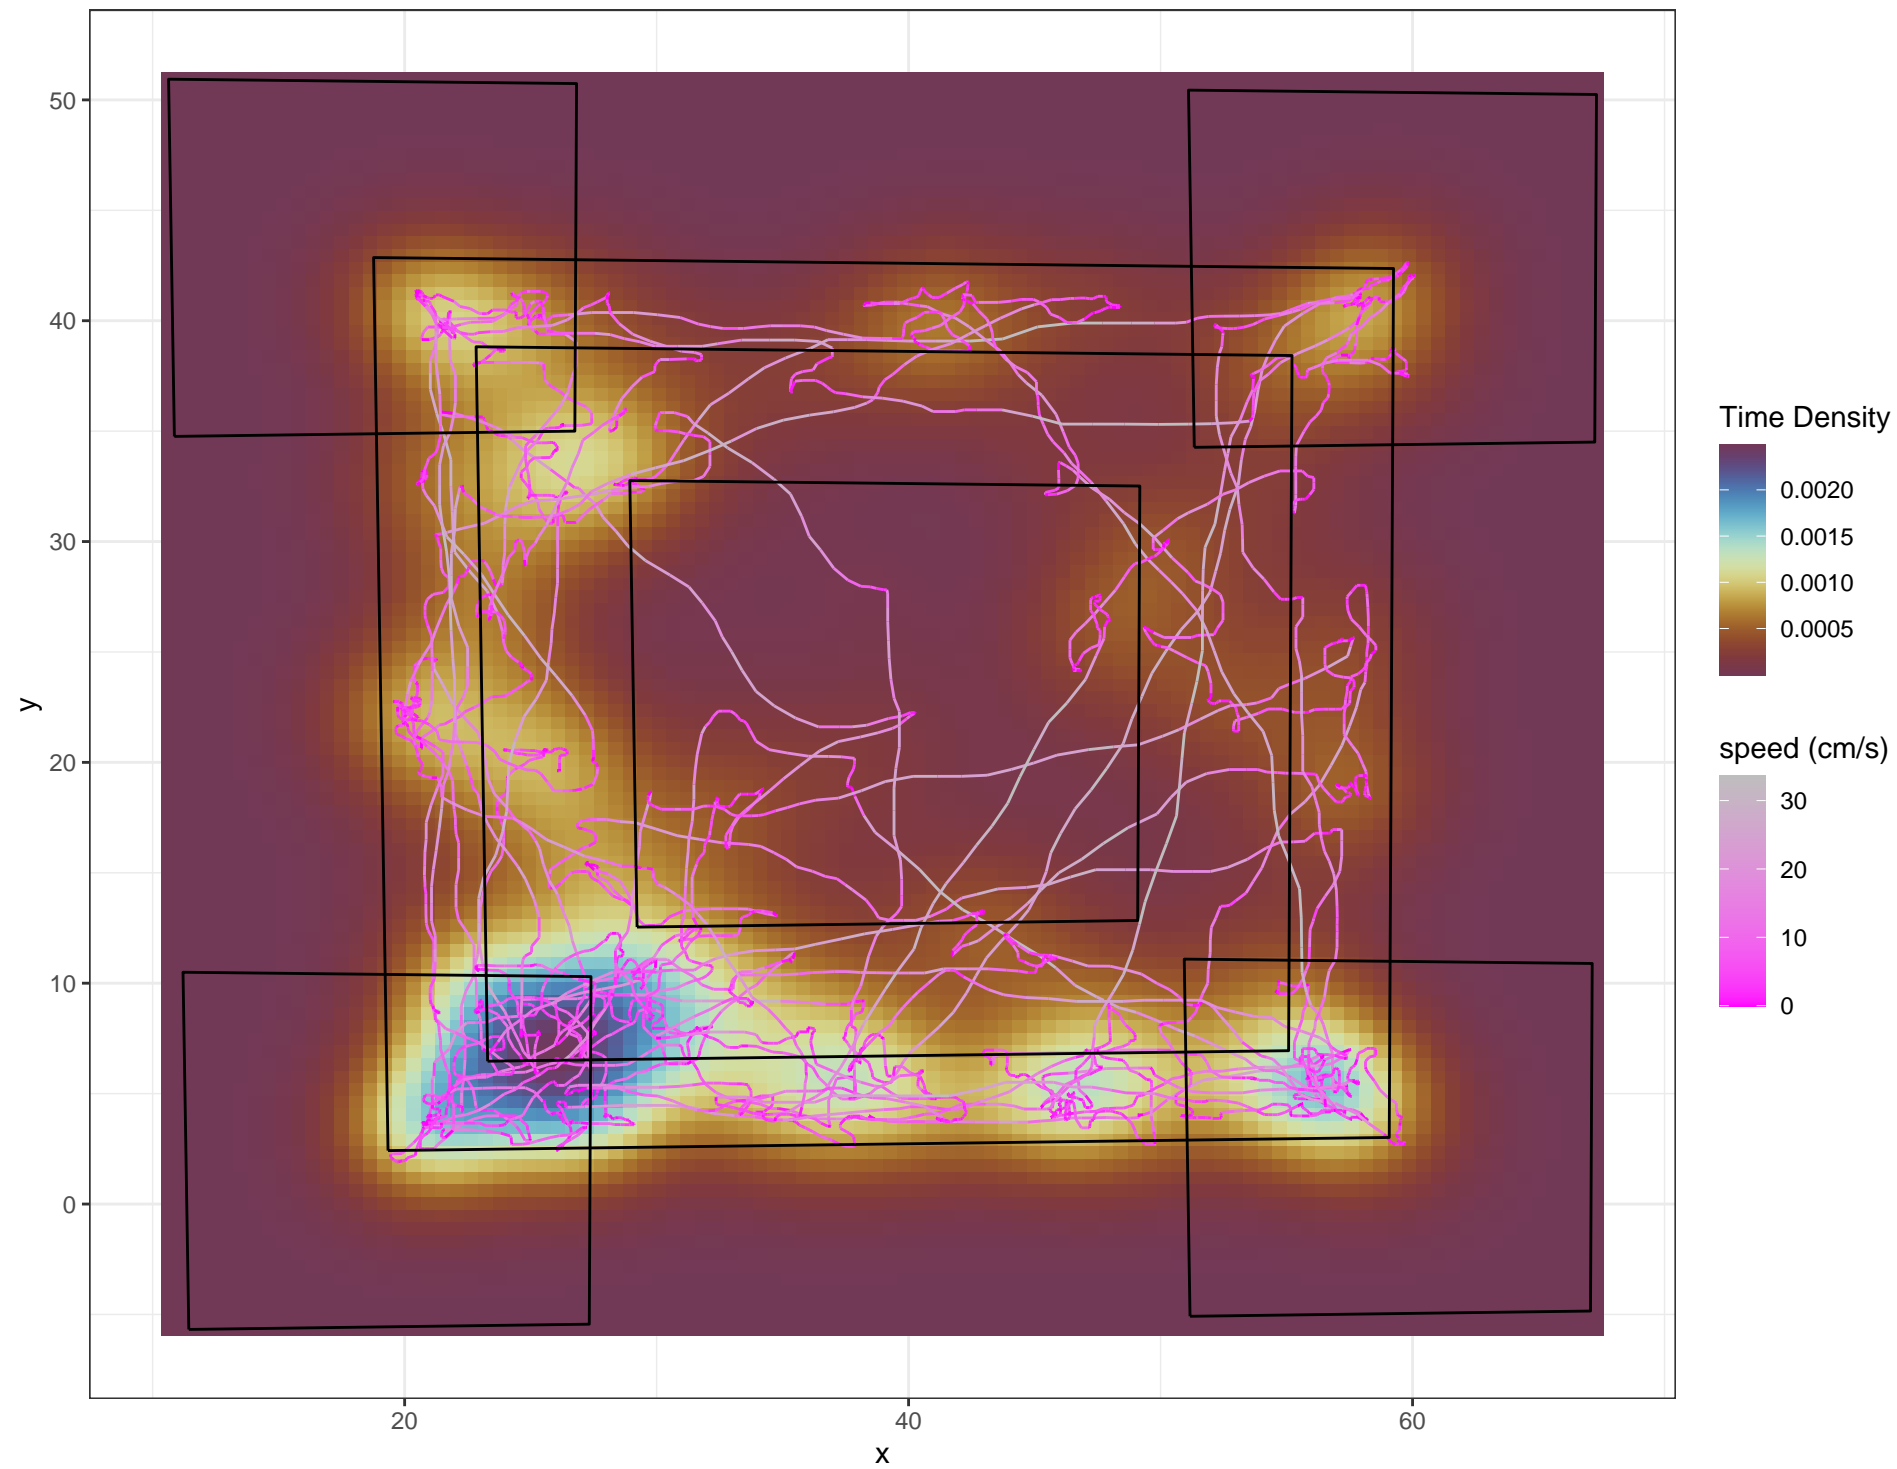

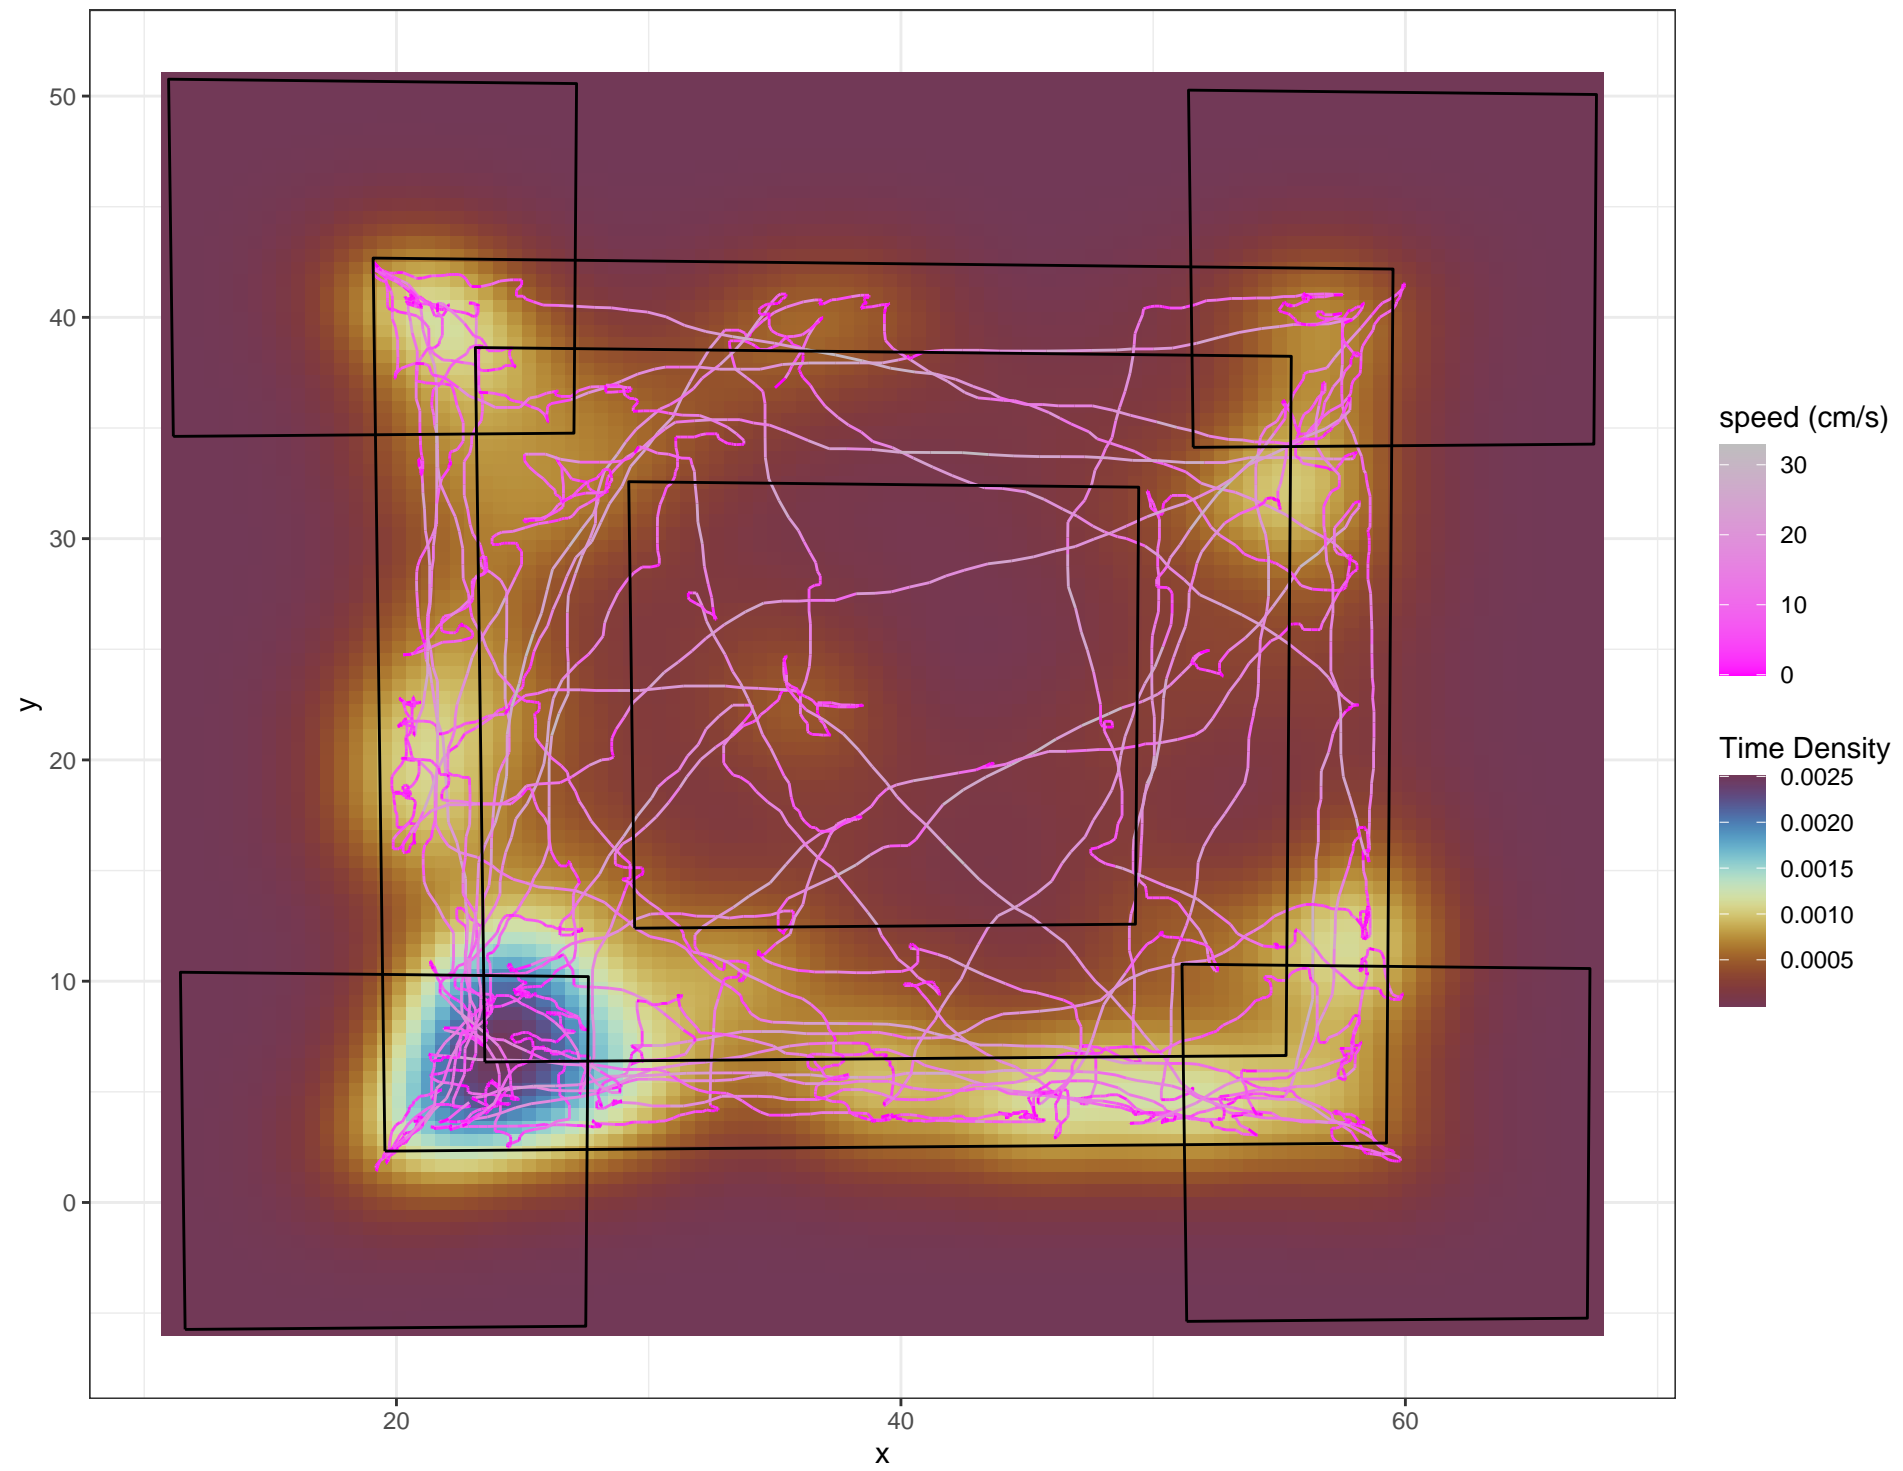

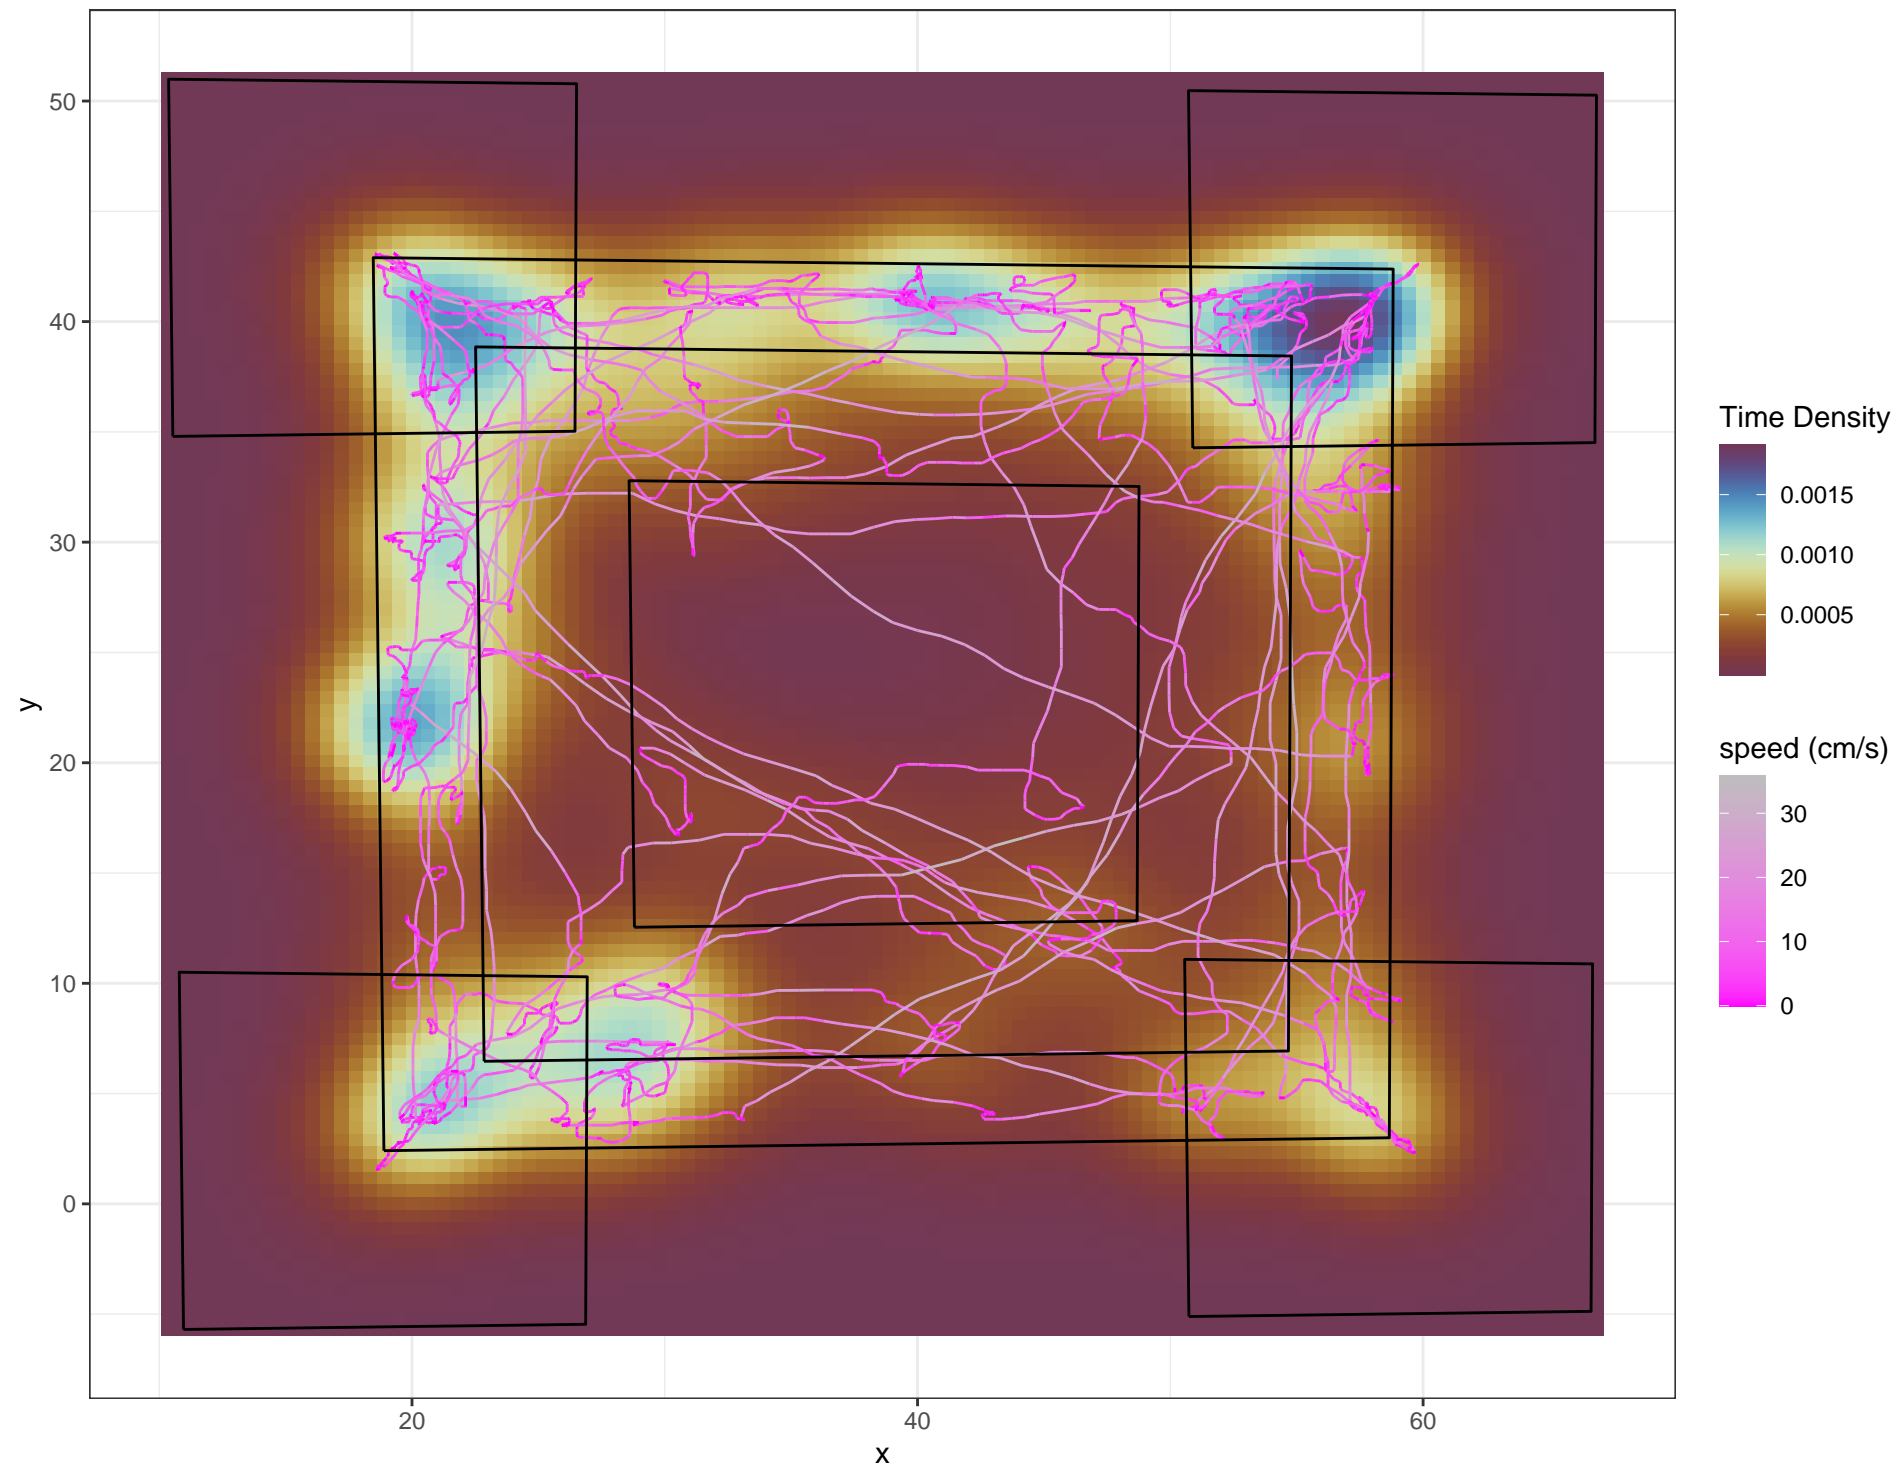



Occiput OF\_top\_DREADD\_92-BL2DLC\_resnet50\_OpenFieldDec23shuffle1\_600000\_filtered.csv

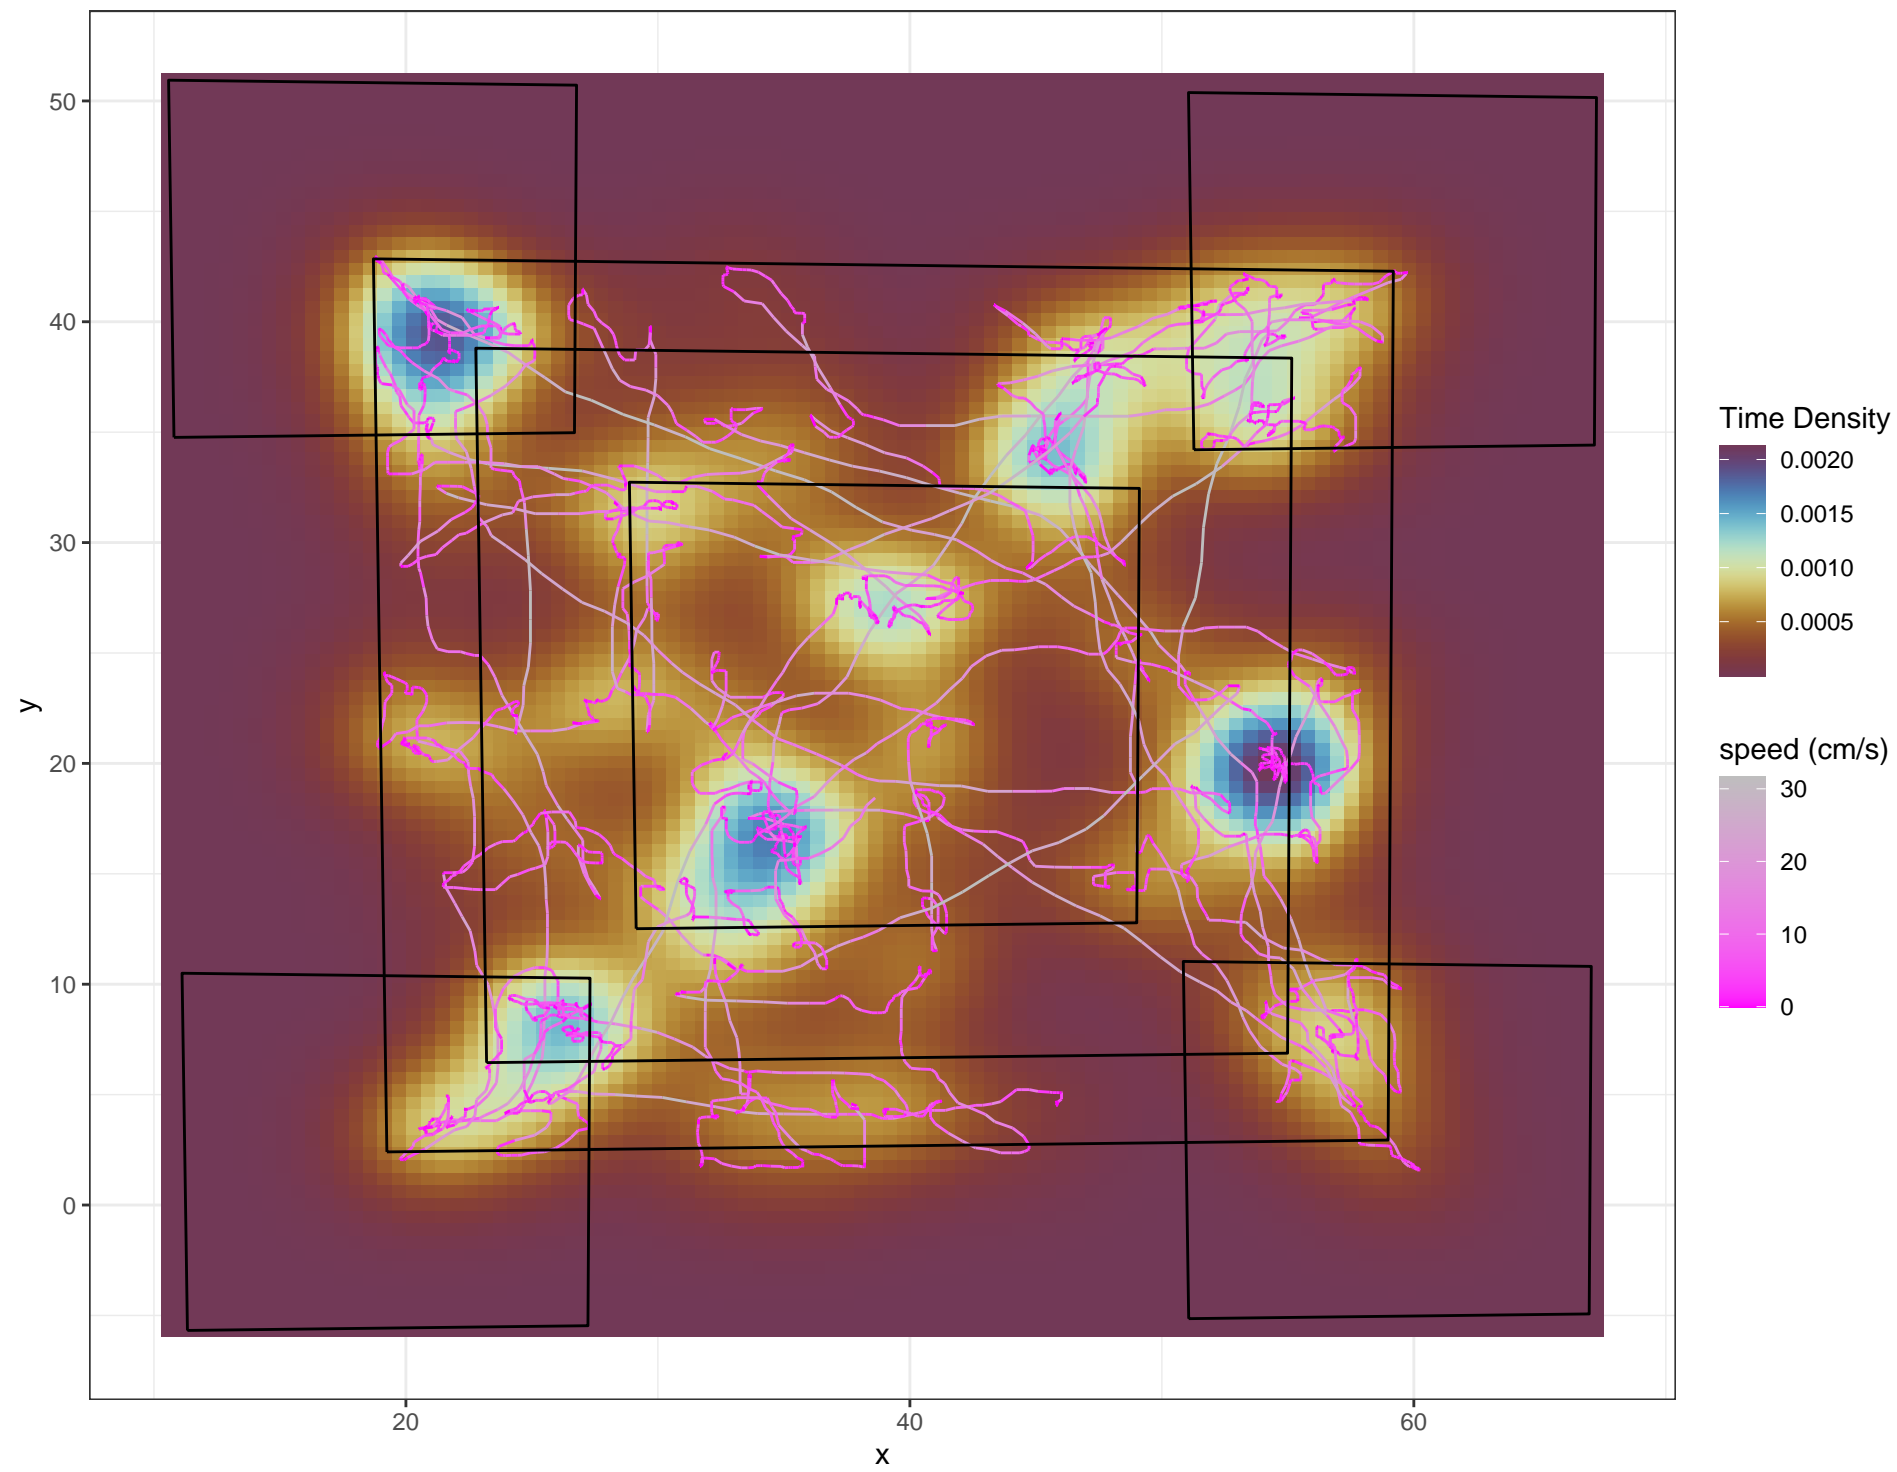

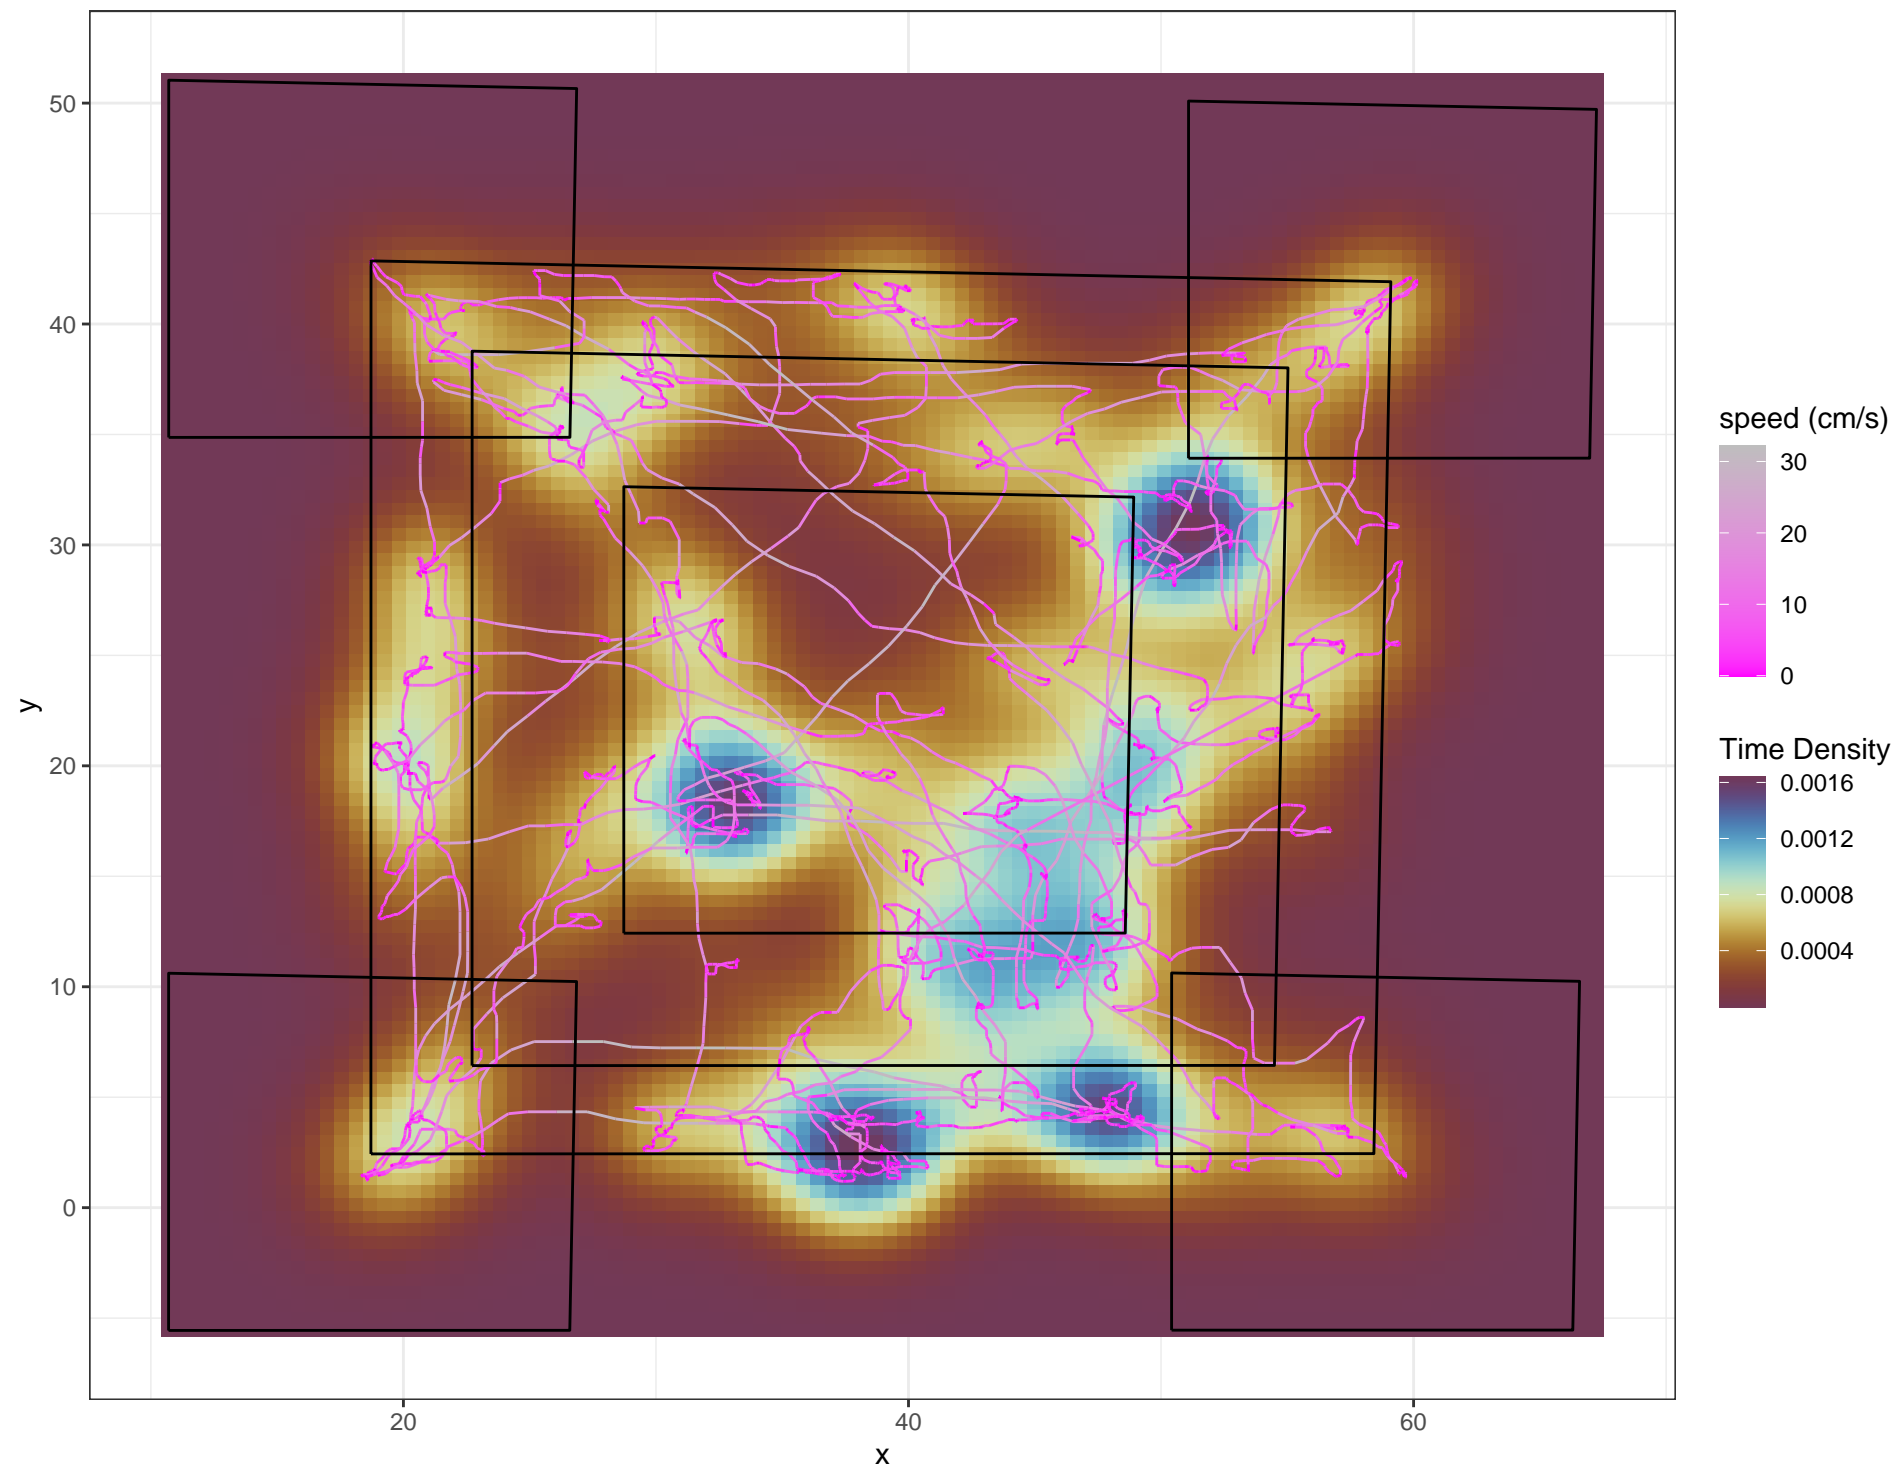

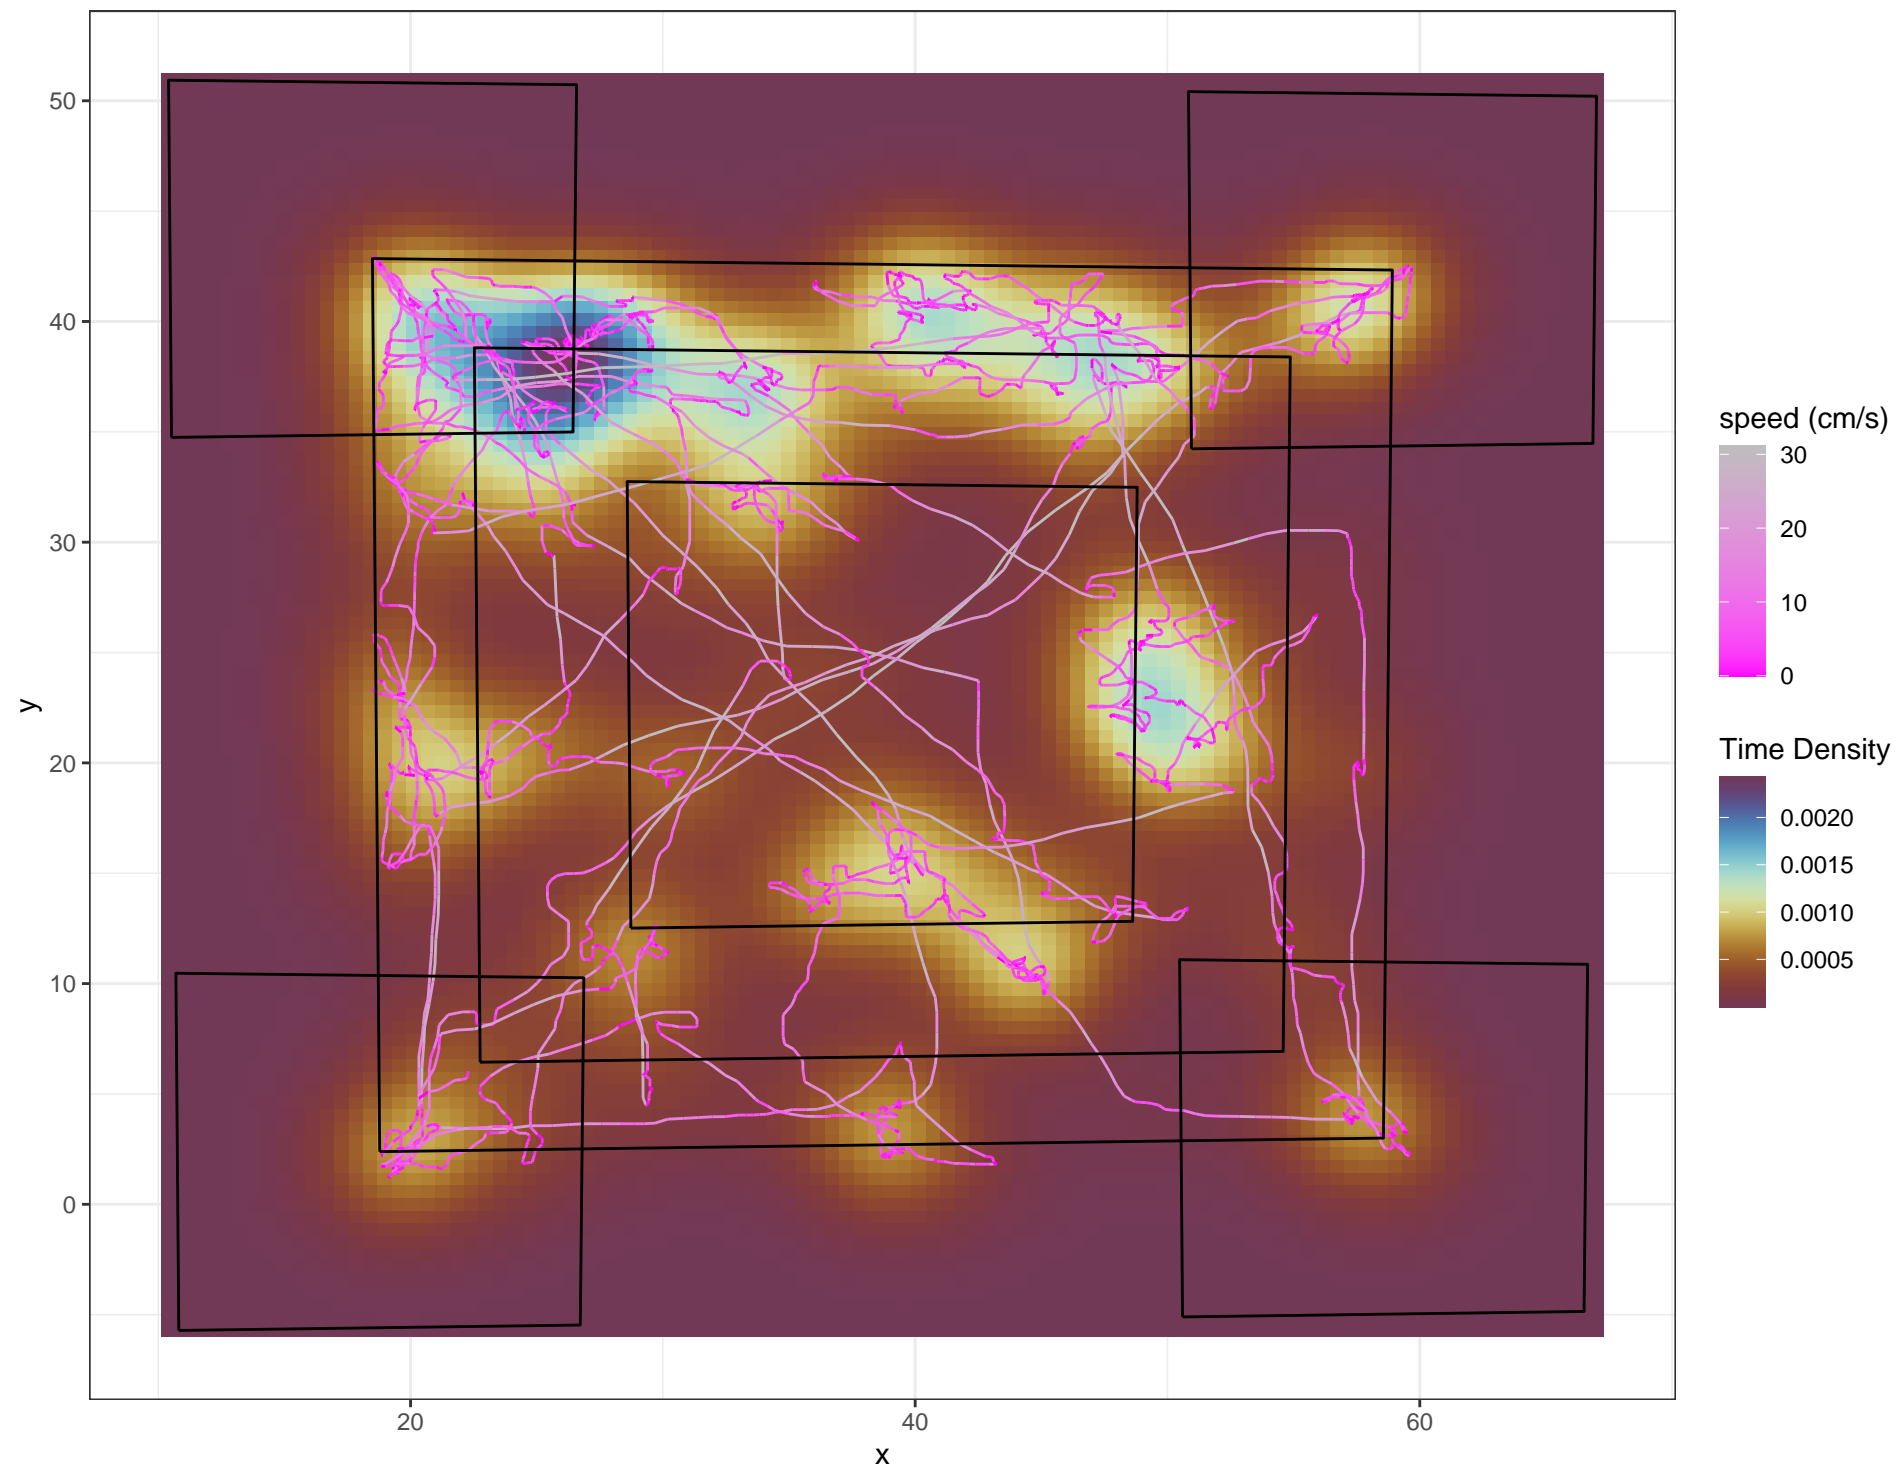

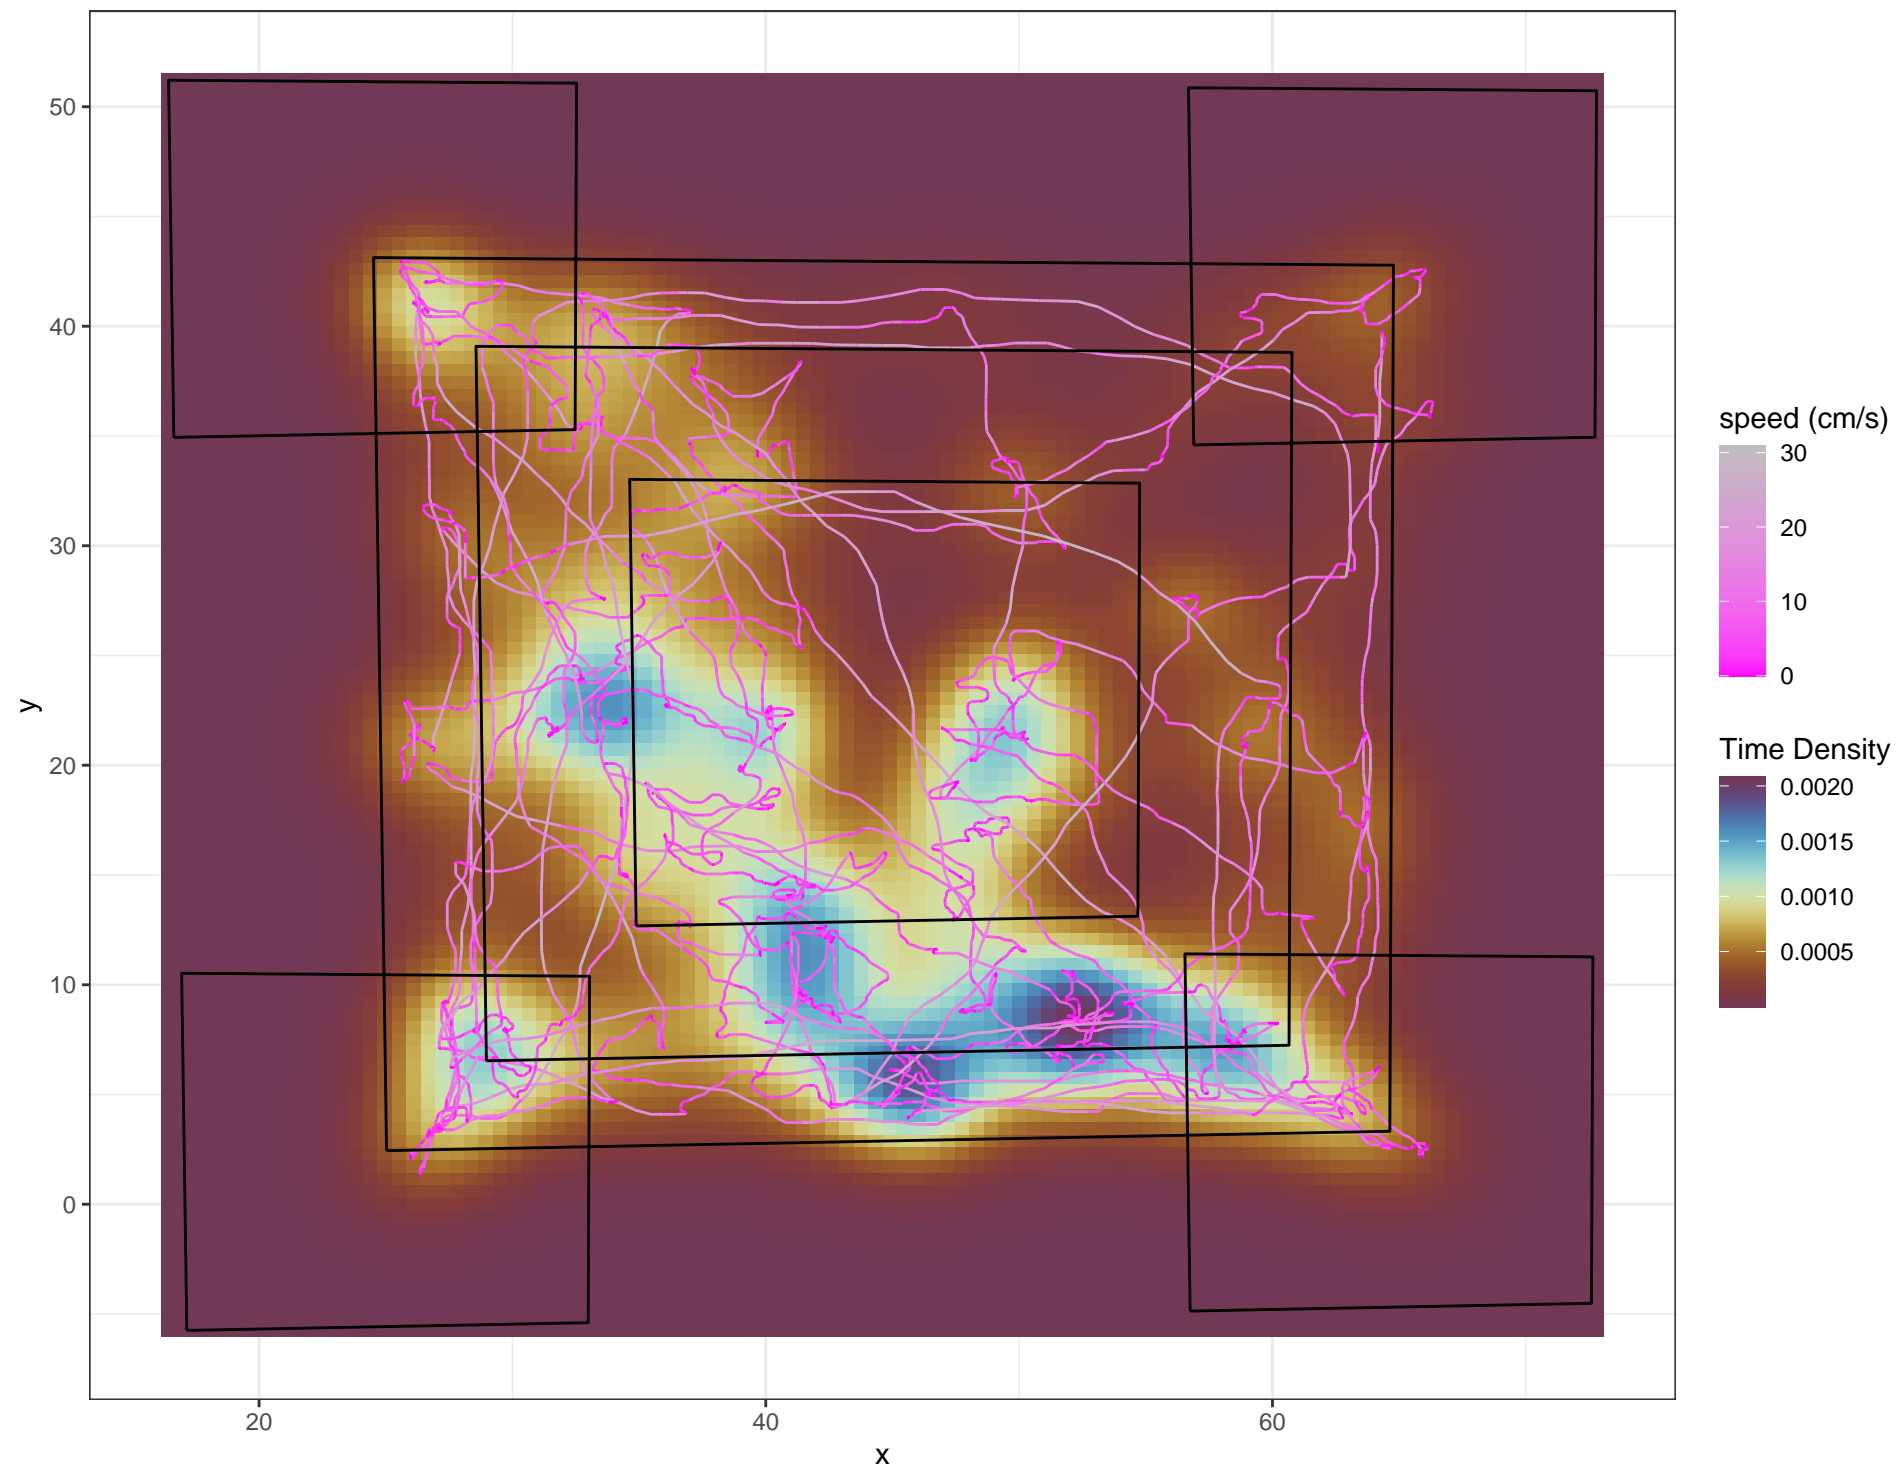

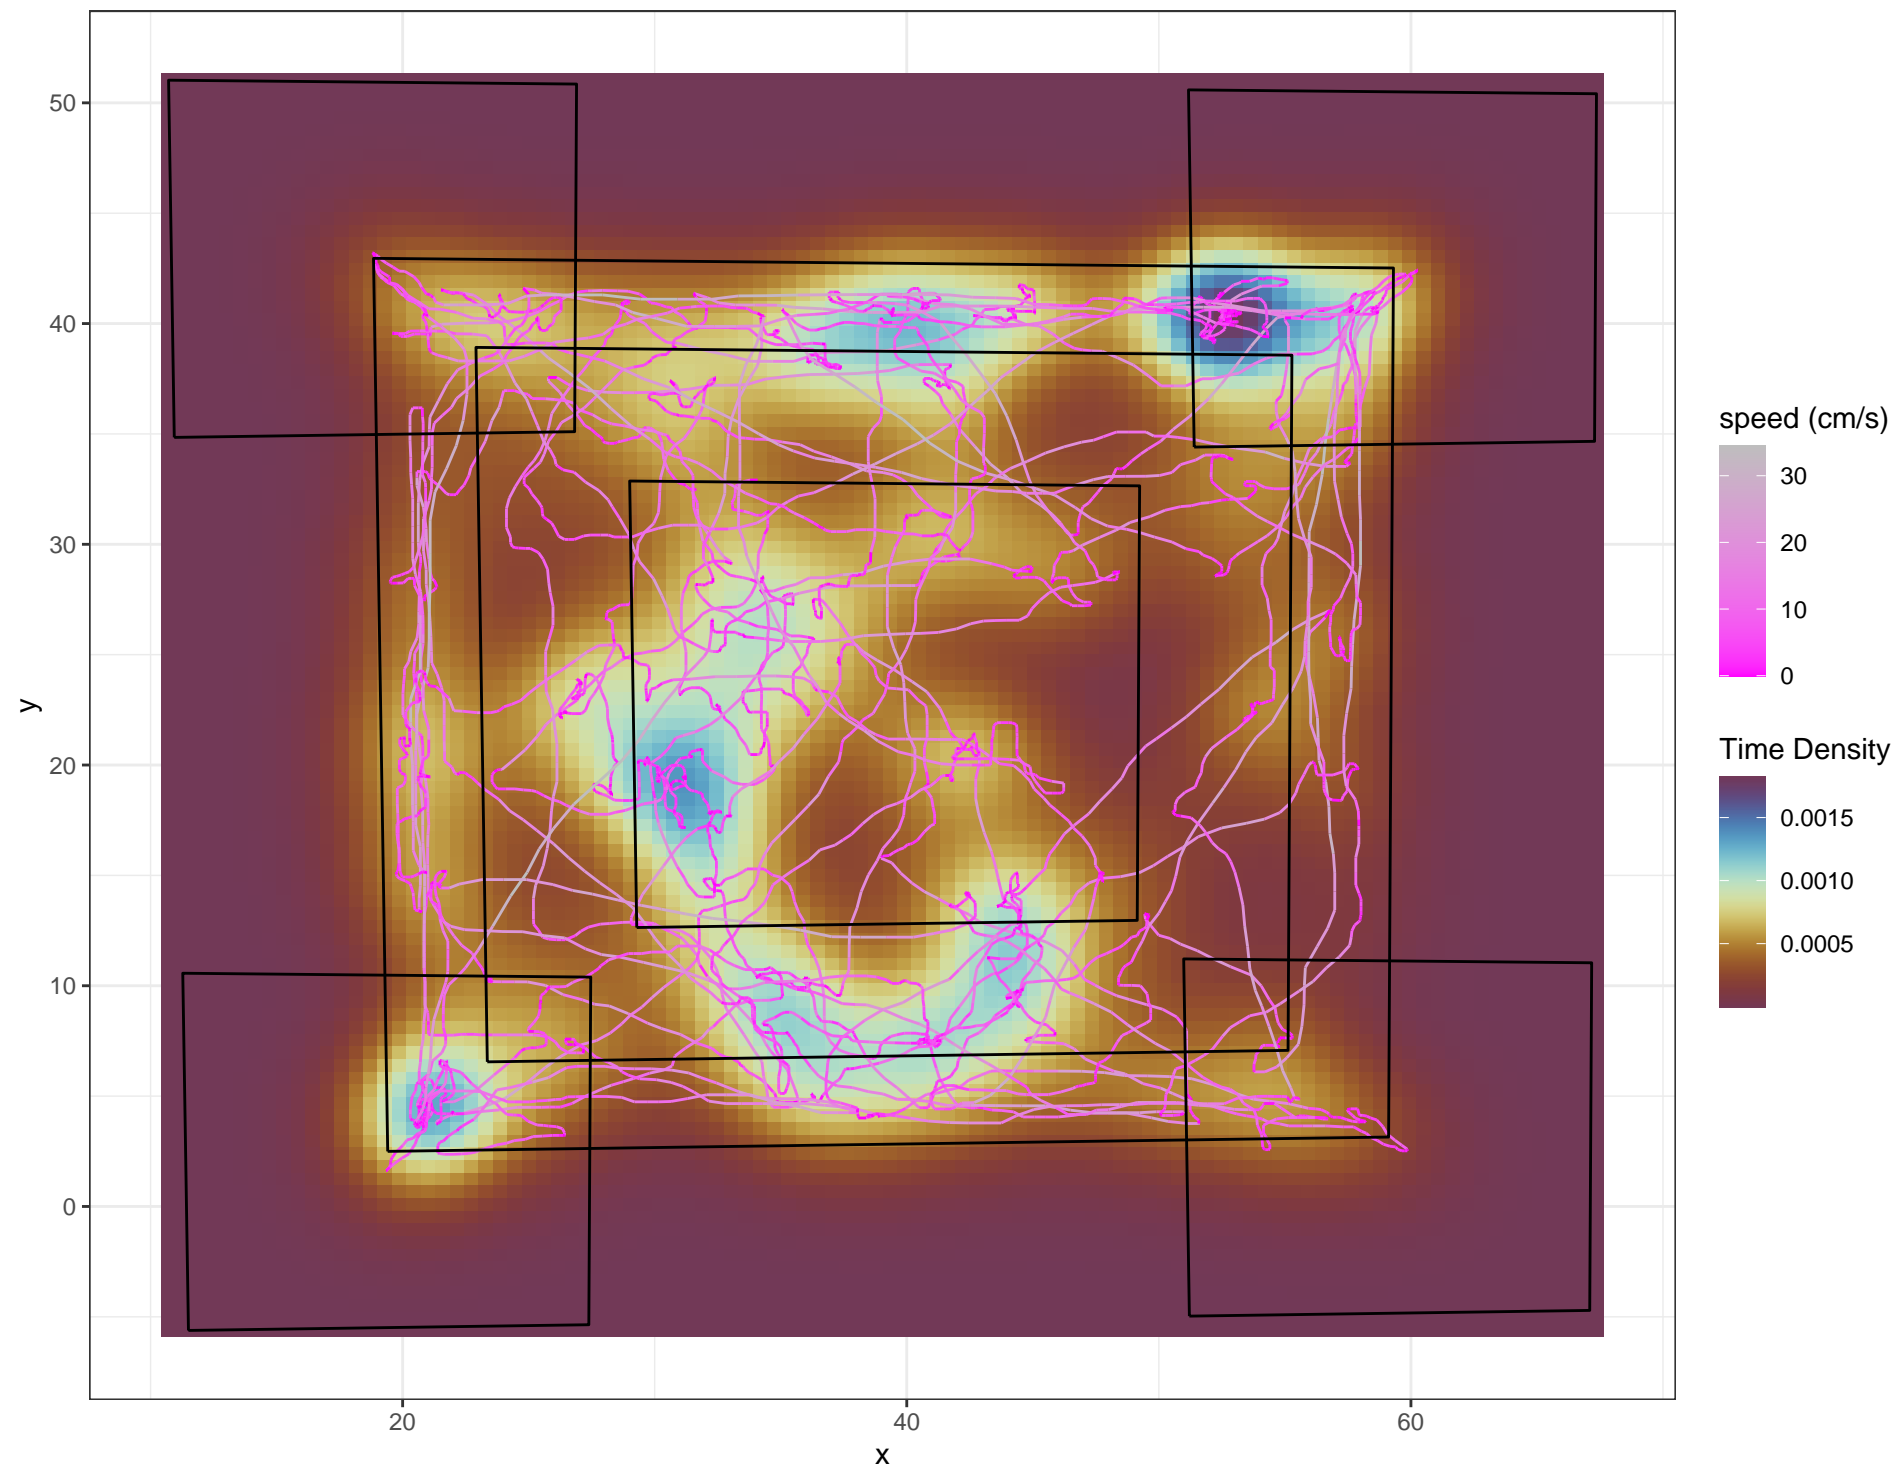

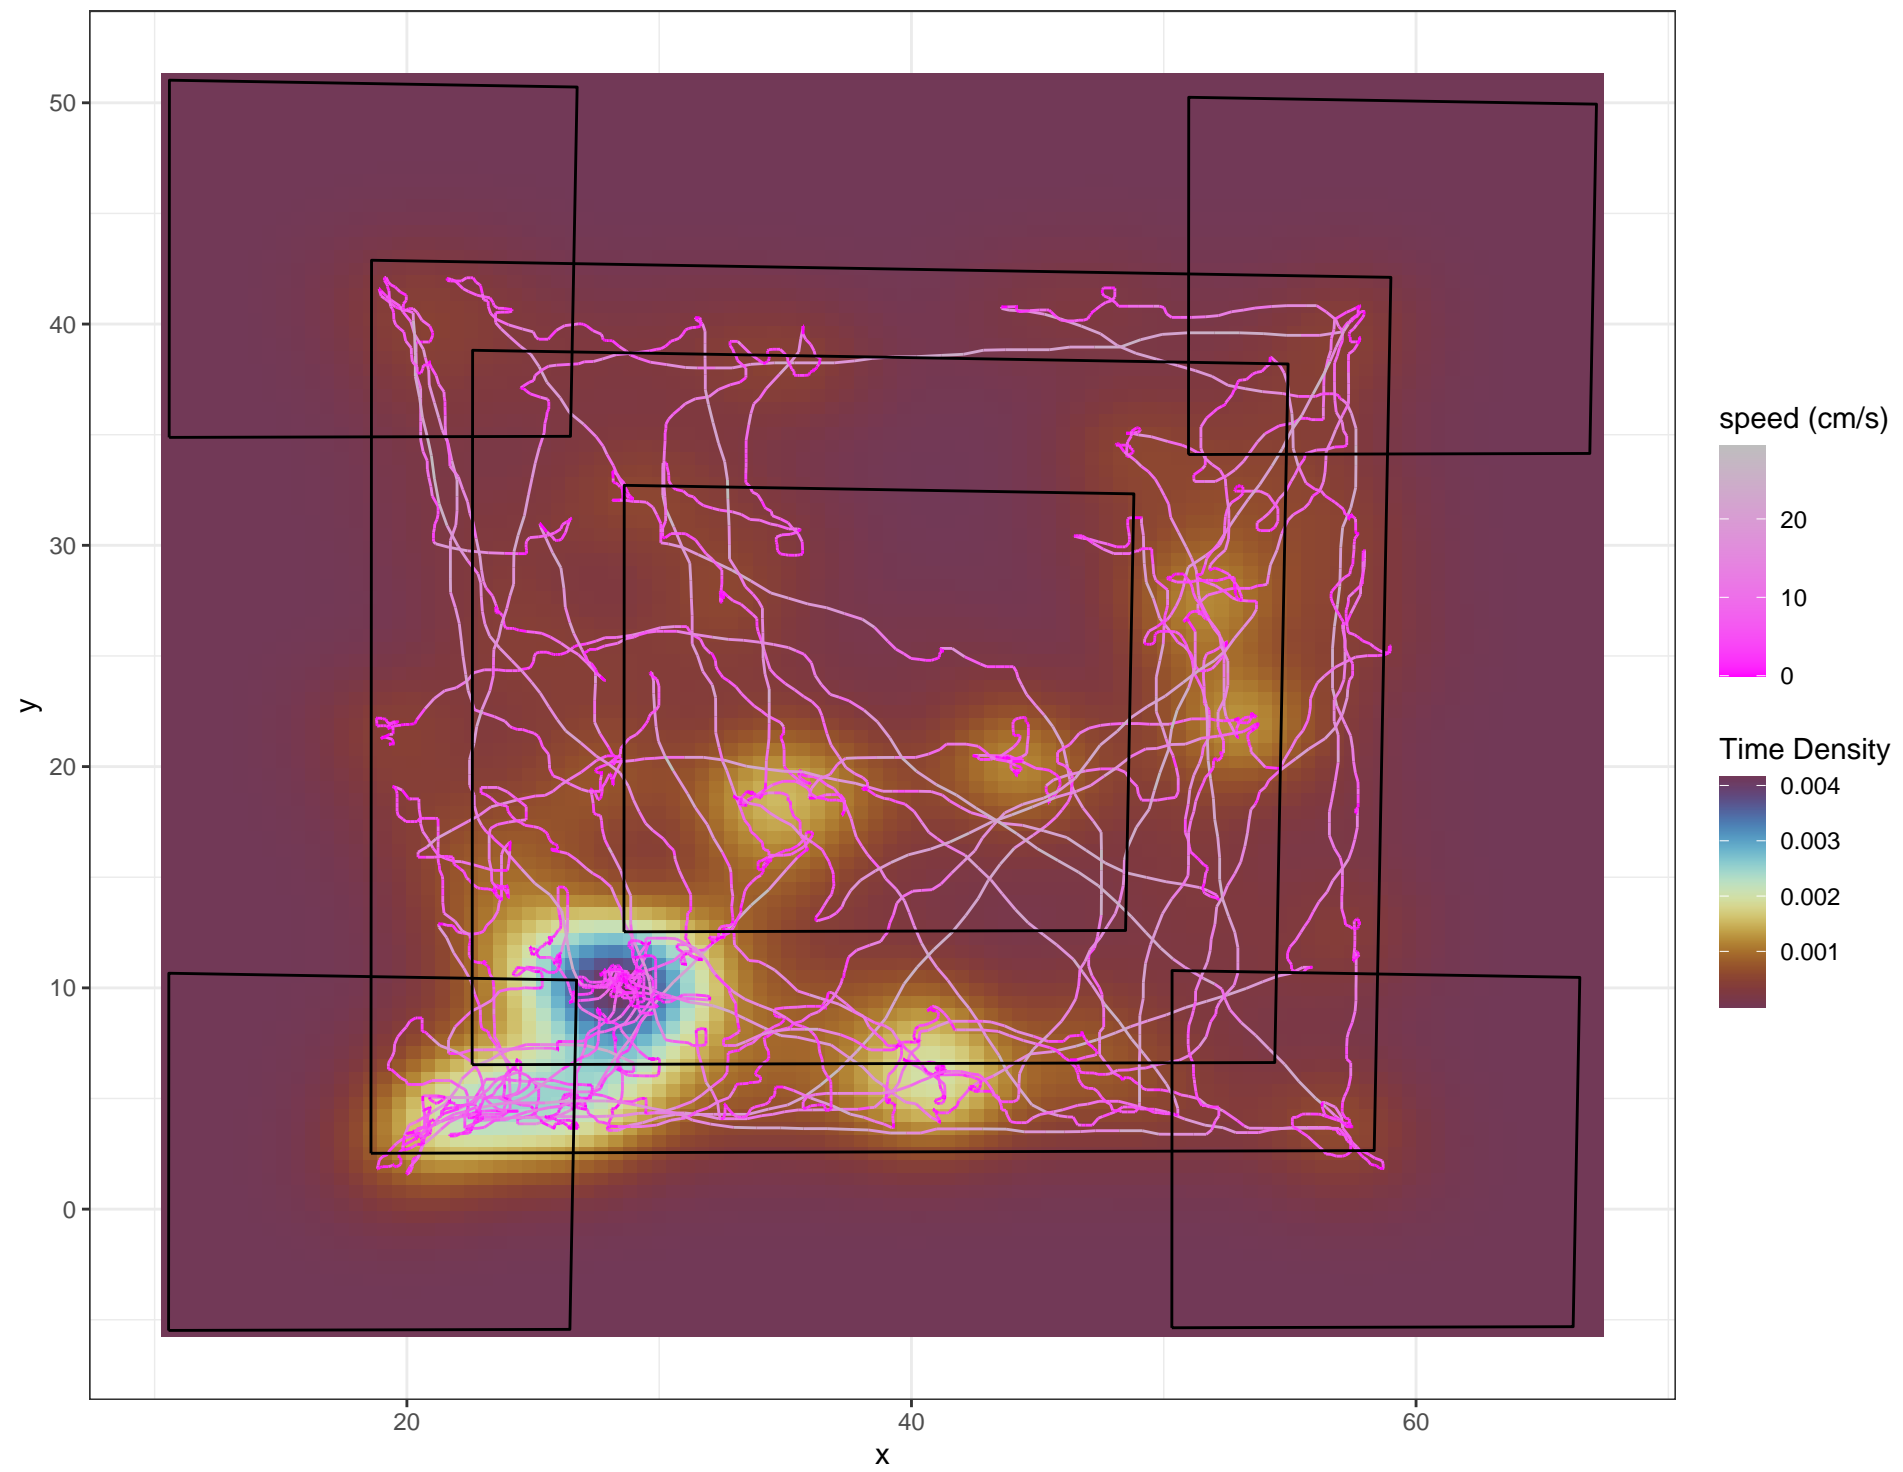

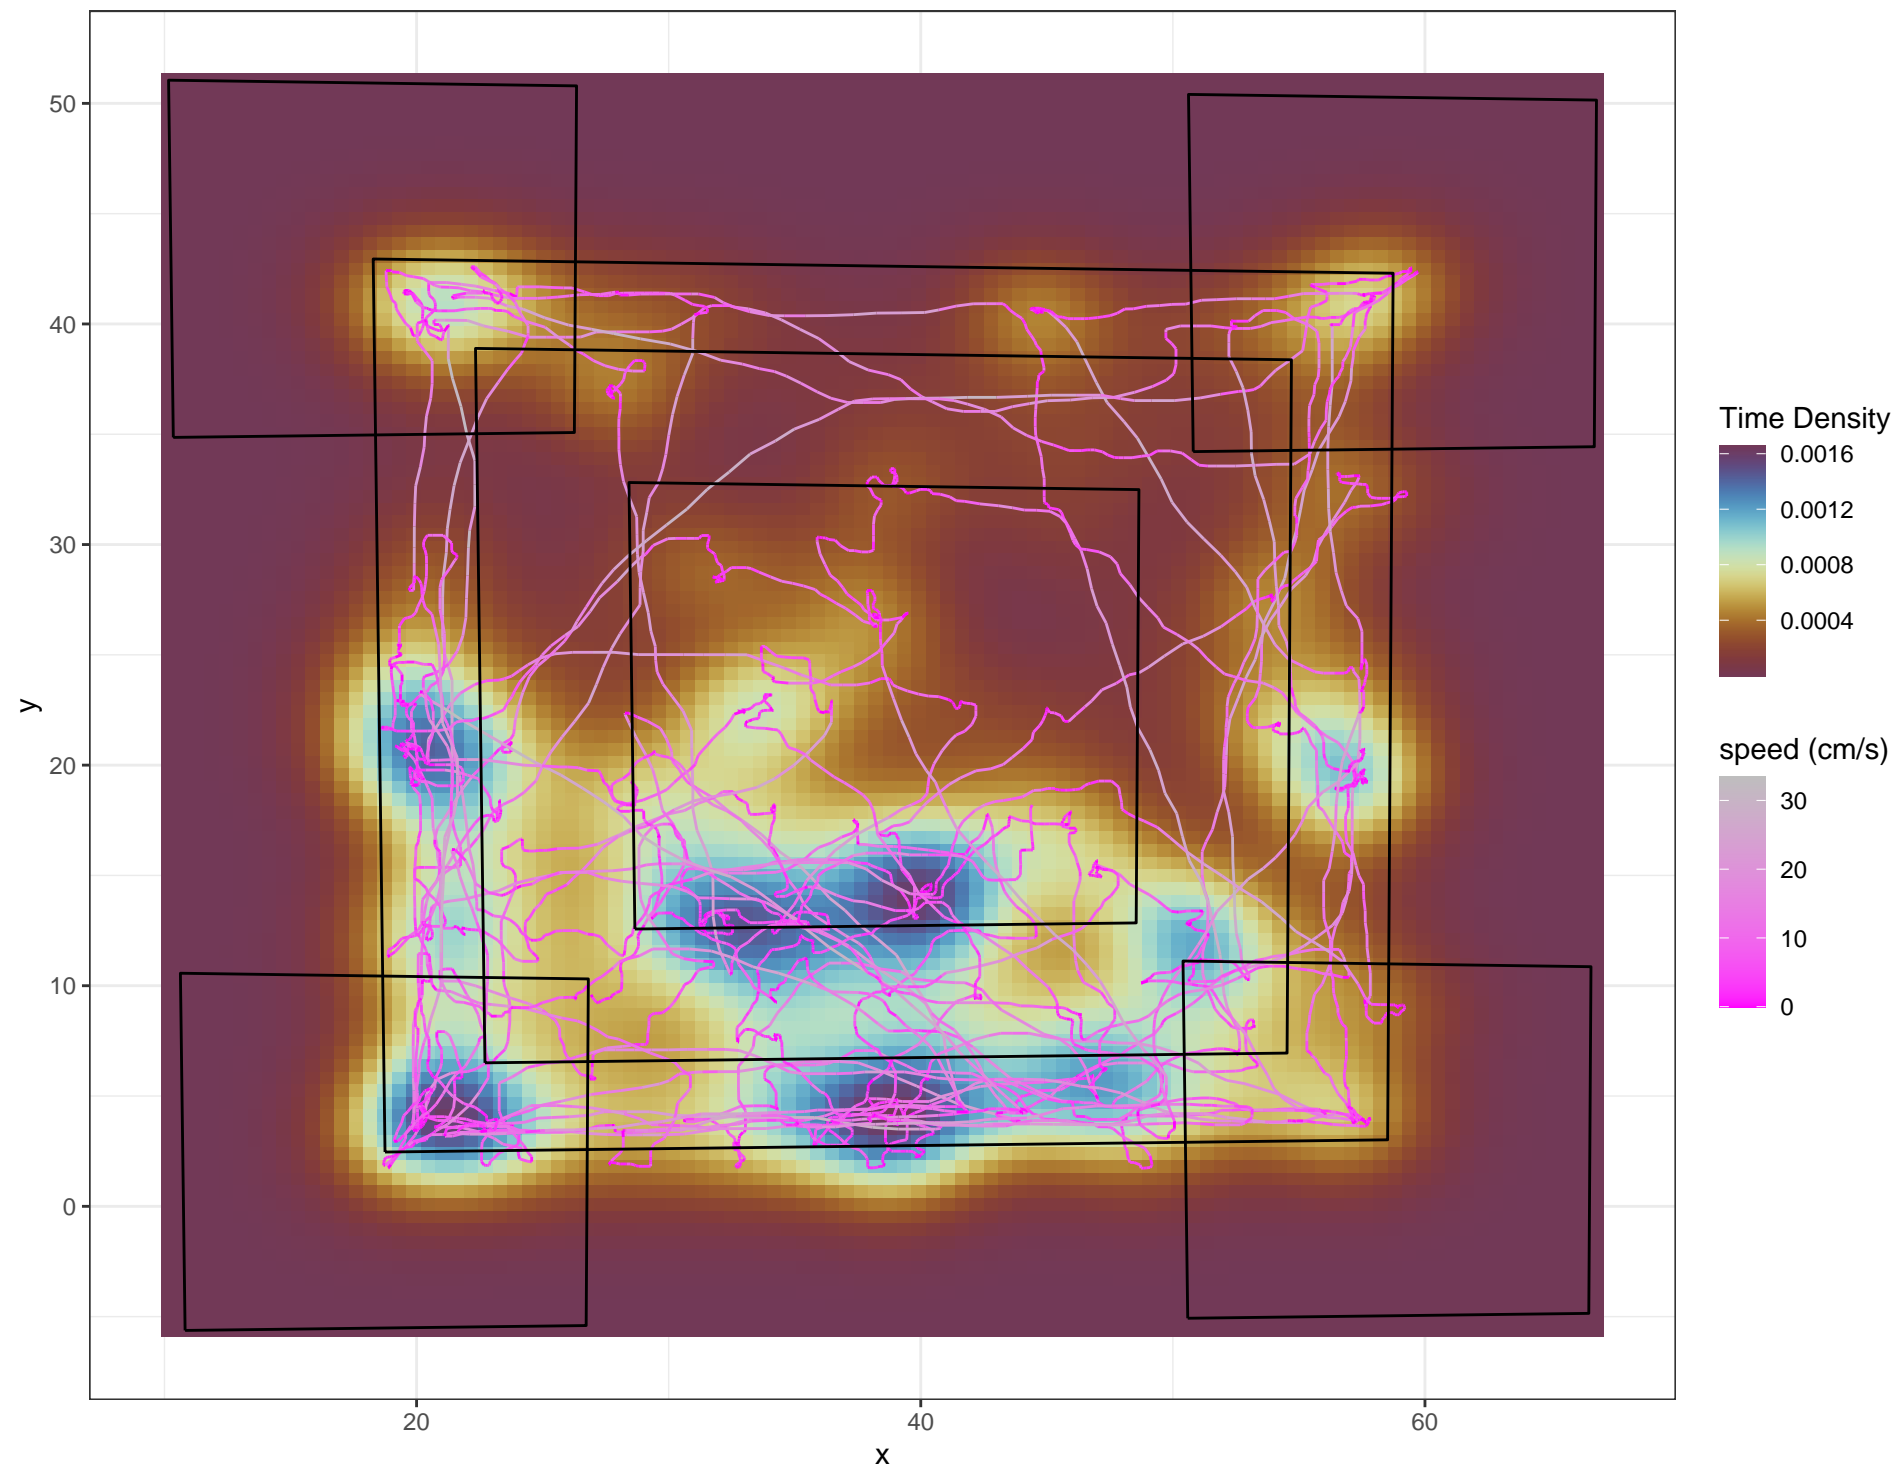

Supplement: supp1 [file elife-86737-supp1-v1.pdf]
