# Supplementary material for: Chemo- and optogenetic activation of hypothalamic Foxb1-expressing neurons and their terminal endings in the rostral-dorsolateral PAG leads to tachypnea, bradycardia, and immobility
Source: eLife journal article supplement (doi:10.7554/elife.86737), 2023-05-25

Maus\_106-21\_10\_MAH01020DLC\_resnet50\_OpenFieldDec23shuffle1\_600000\_filtered.csv

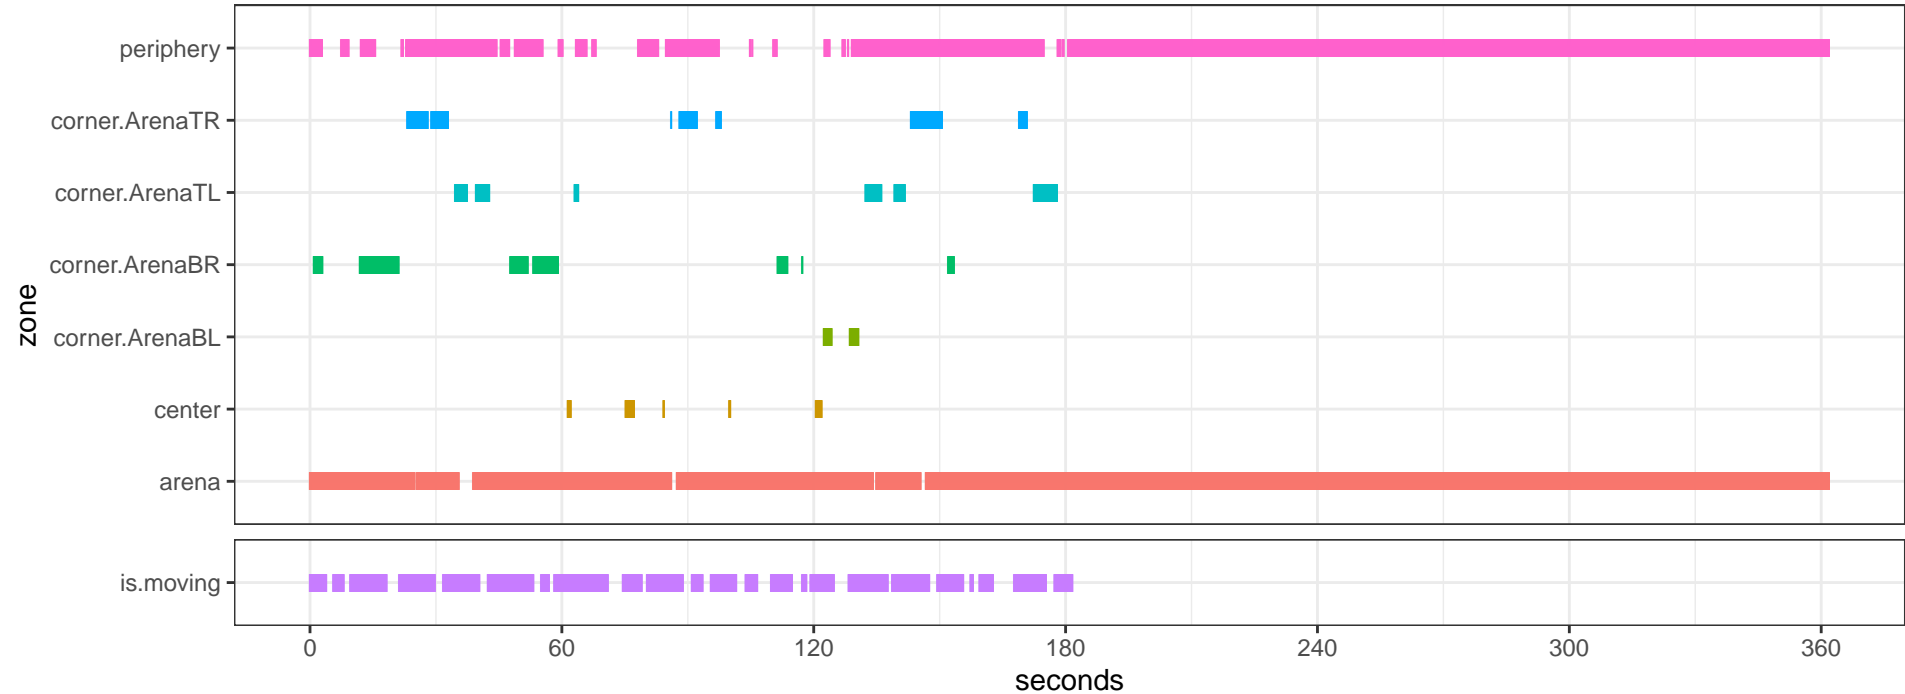

Maus\_106-21\_A\_MAH01016DLC\_resnet50\_OpenFieldDec23shuffle1\_600000\_filtered.csv

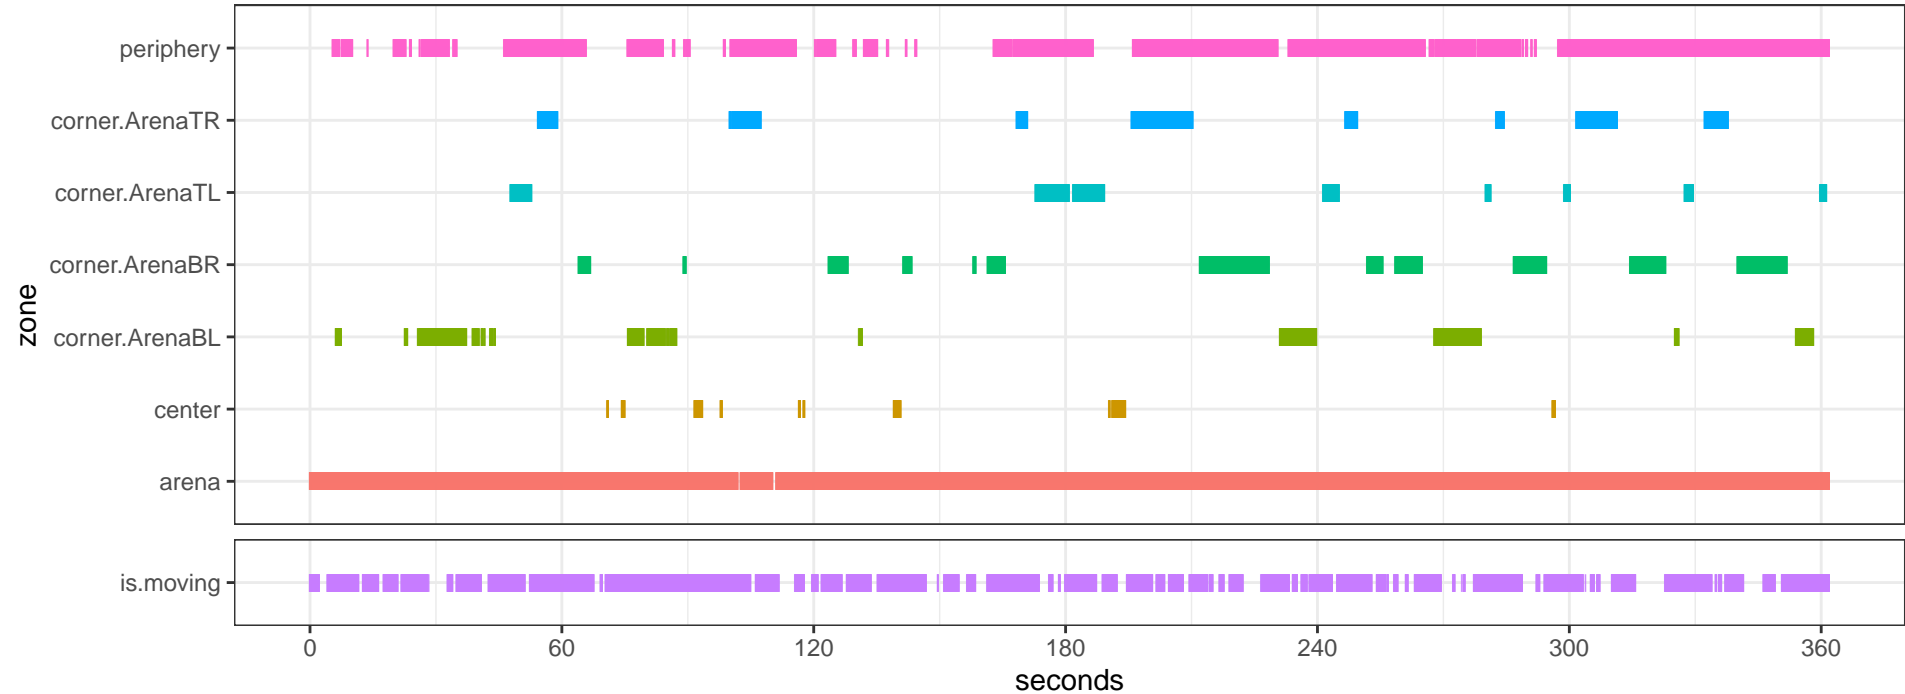

Maus\_106-21\_B\_MAH01017DLC\_resnet50\_OpenFieldDec23shuffle1\_600000\_filtered.csv

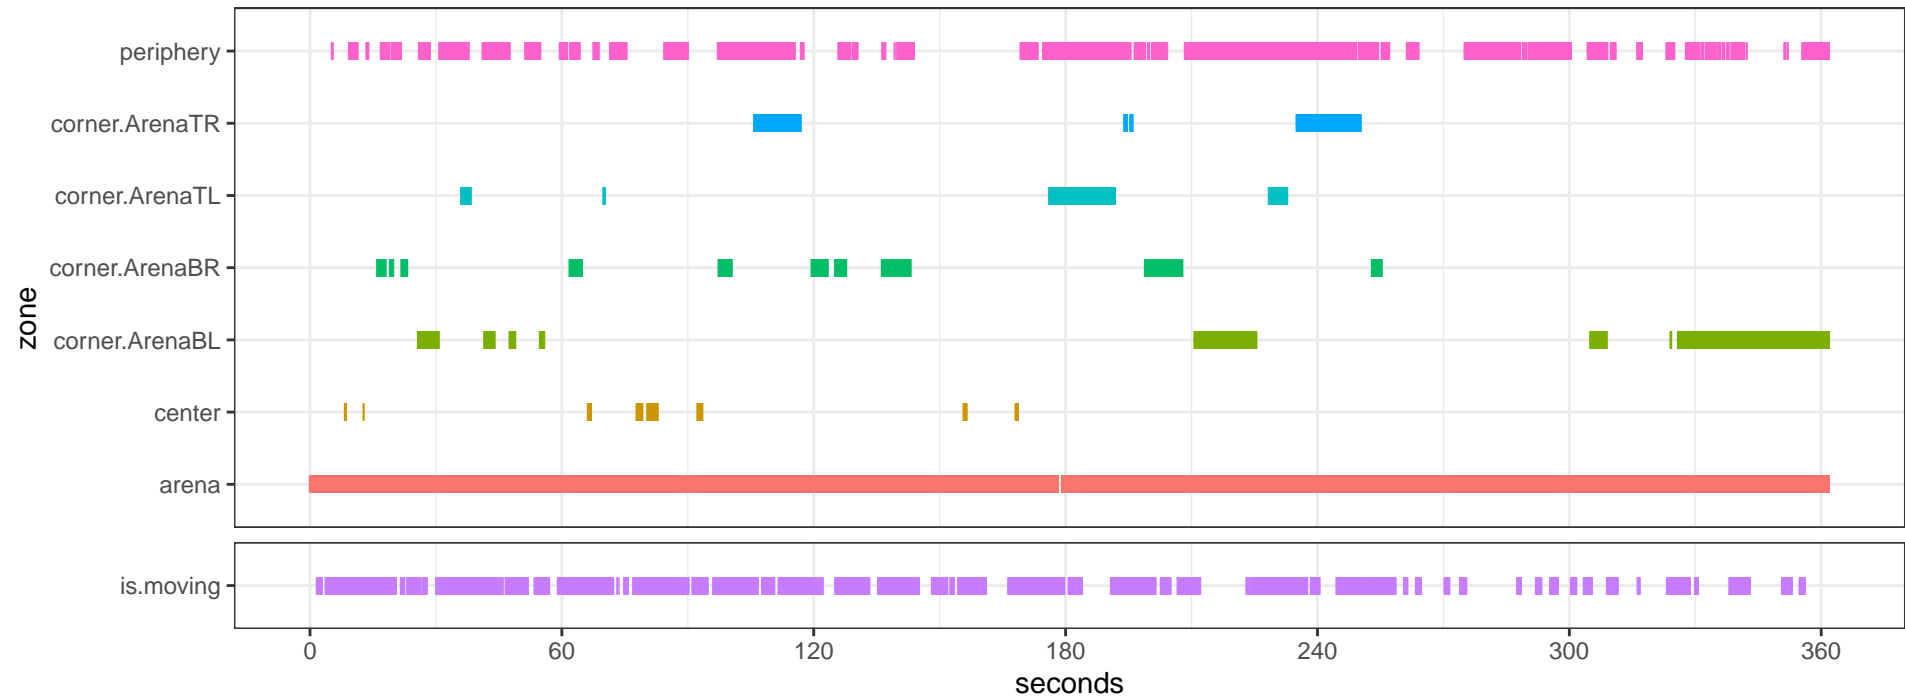

Maus\_106-21\_C\_MAH01018DLC\_resnet50\_OpenFieldDec23shuffle1\_600000\_filtered.csv

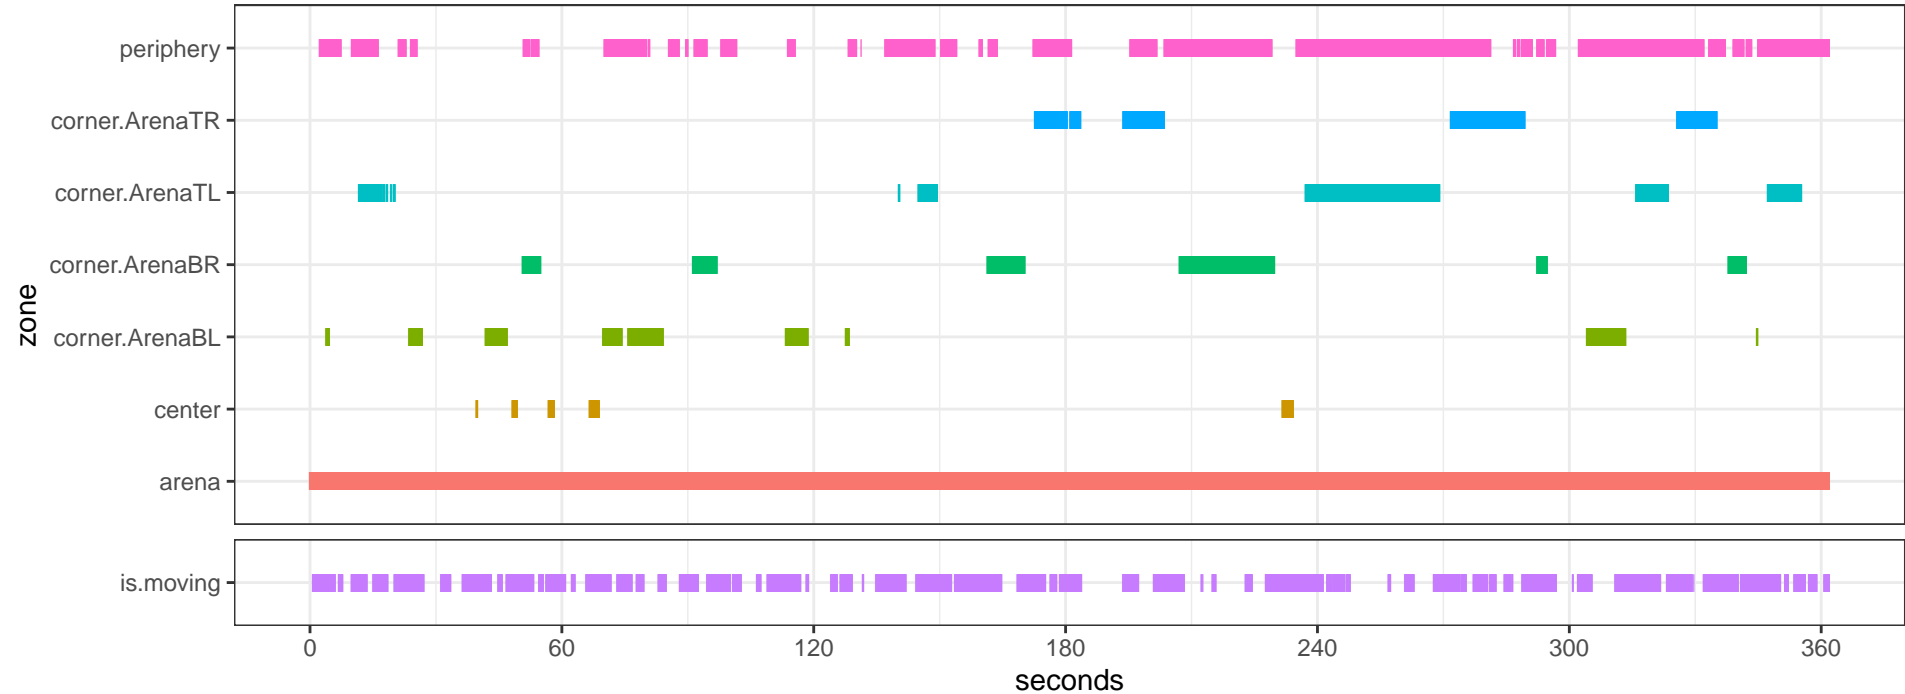

Maus\_106-21\_D\_MAH01019DLC\_resnet50\_OpenFieldDec23shuffle1\_600000\_filtered.csv

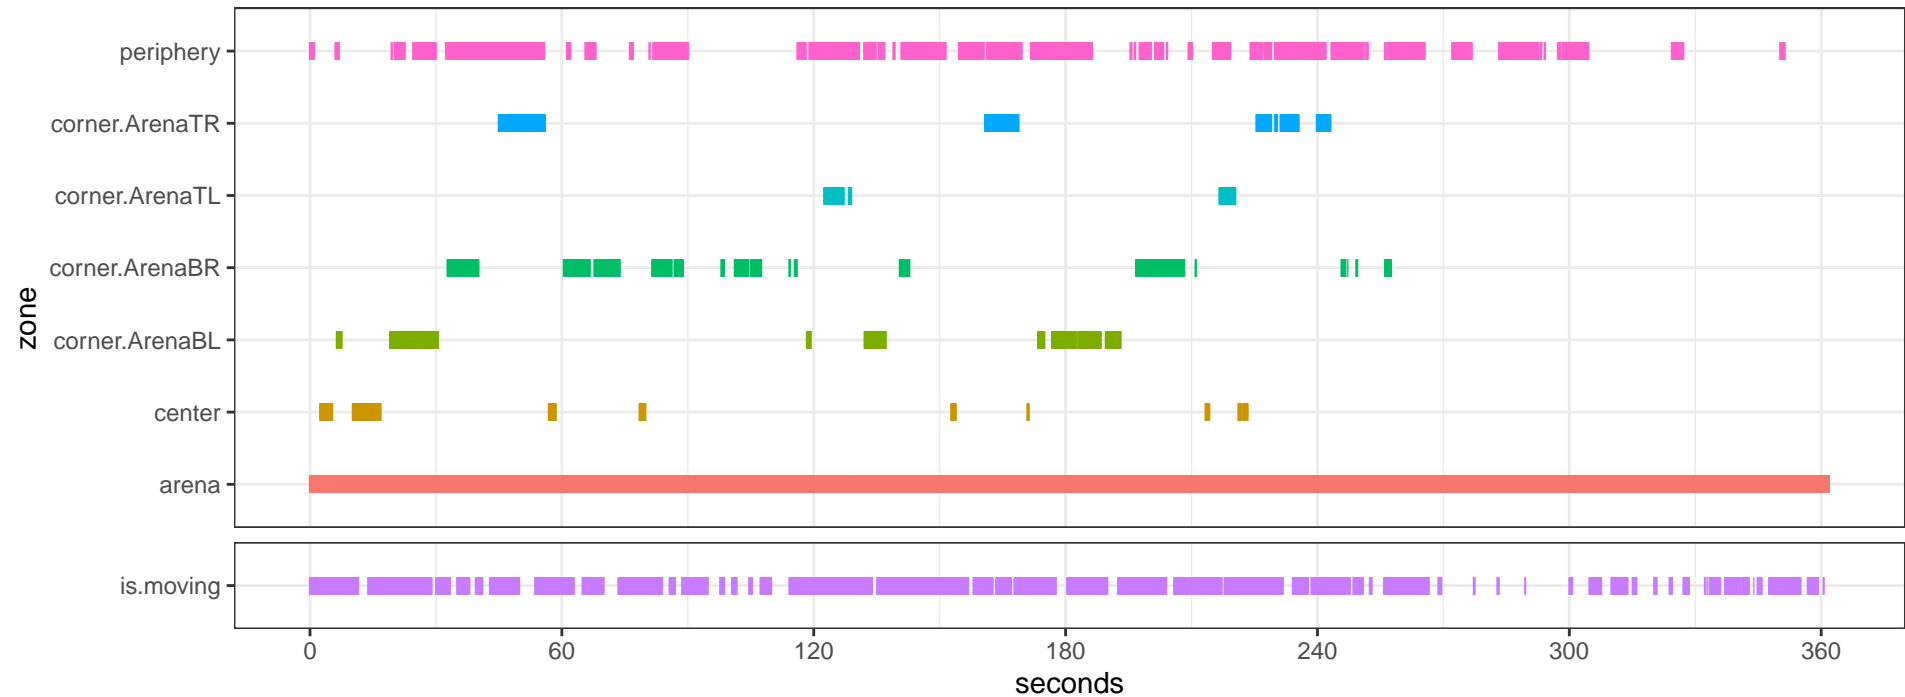

Maus\_34-21\_10\_MAH00866DLC\_resnet50\_OpenFieldDec23shuffle1\_600000\_filtered.csv

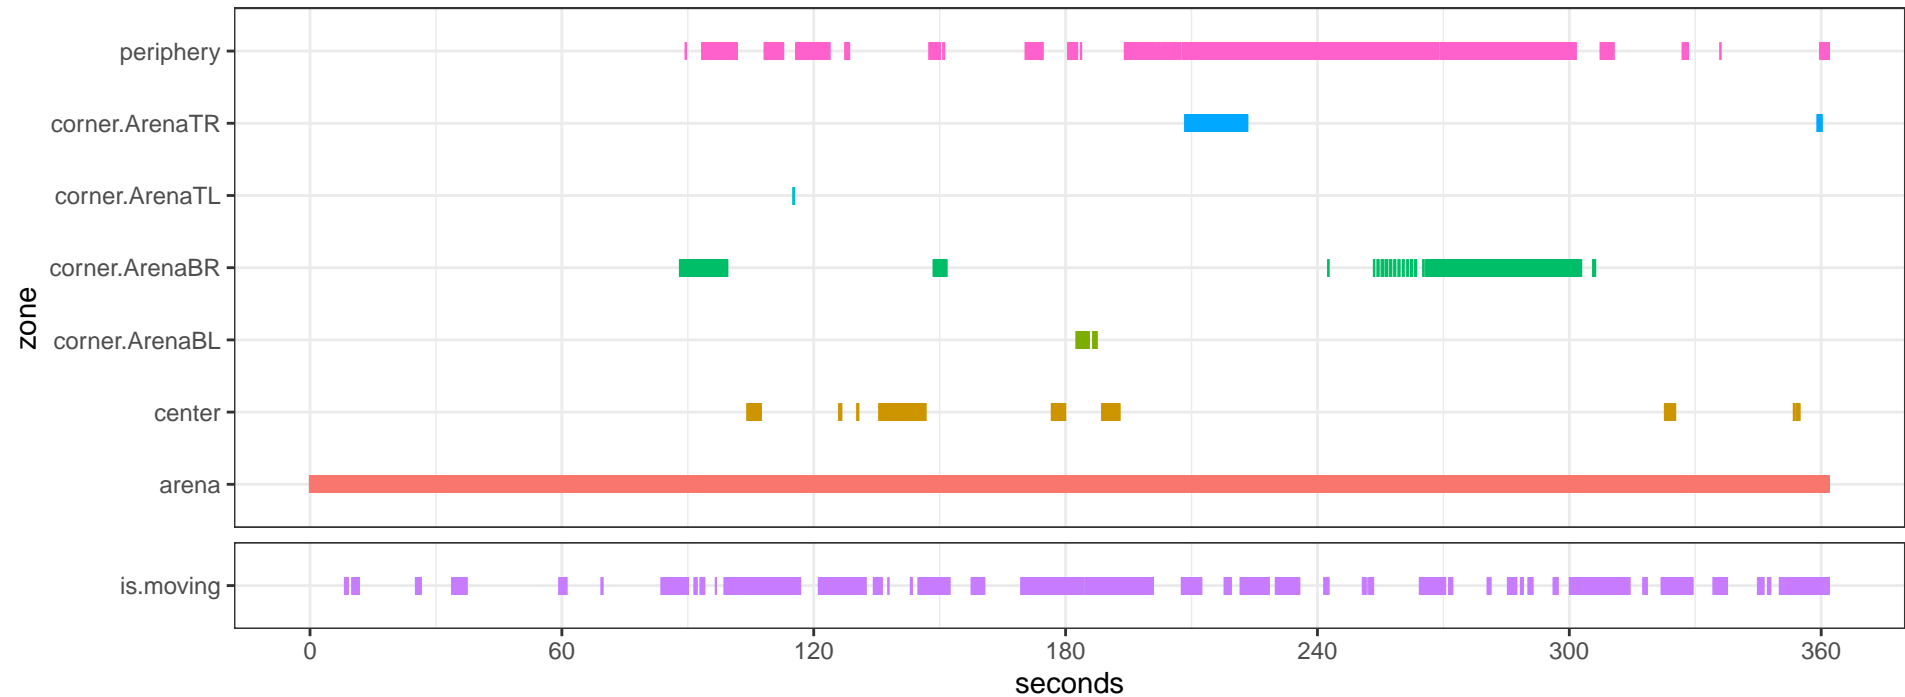

Maus\_34-21\_11\_MAH00863DLC\_resnet50\_OpenFieldDec23shuffle1\_600000\_filtered.csv

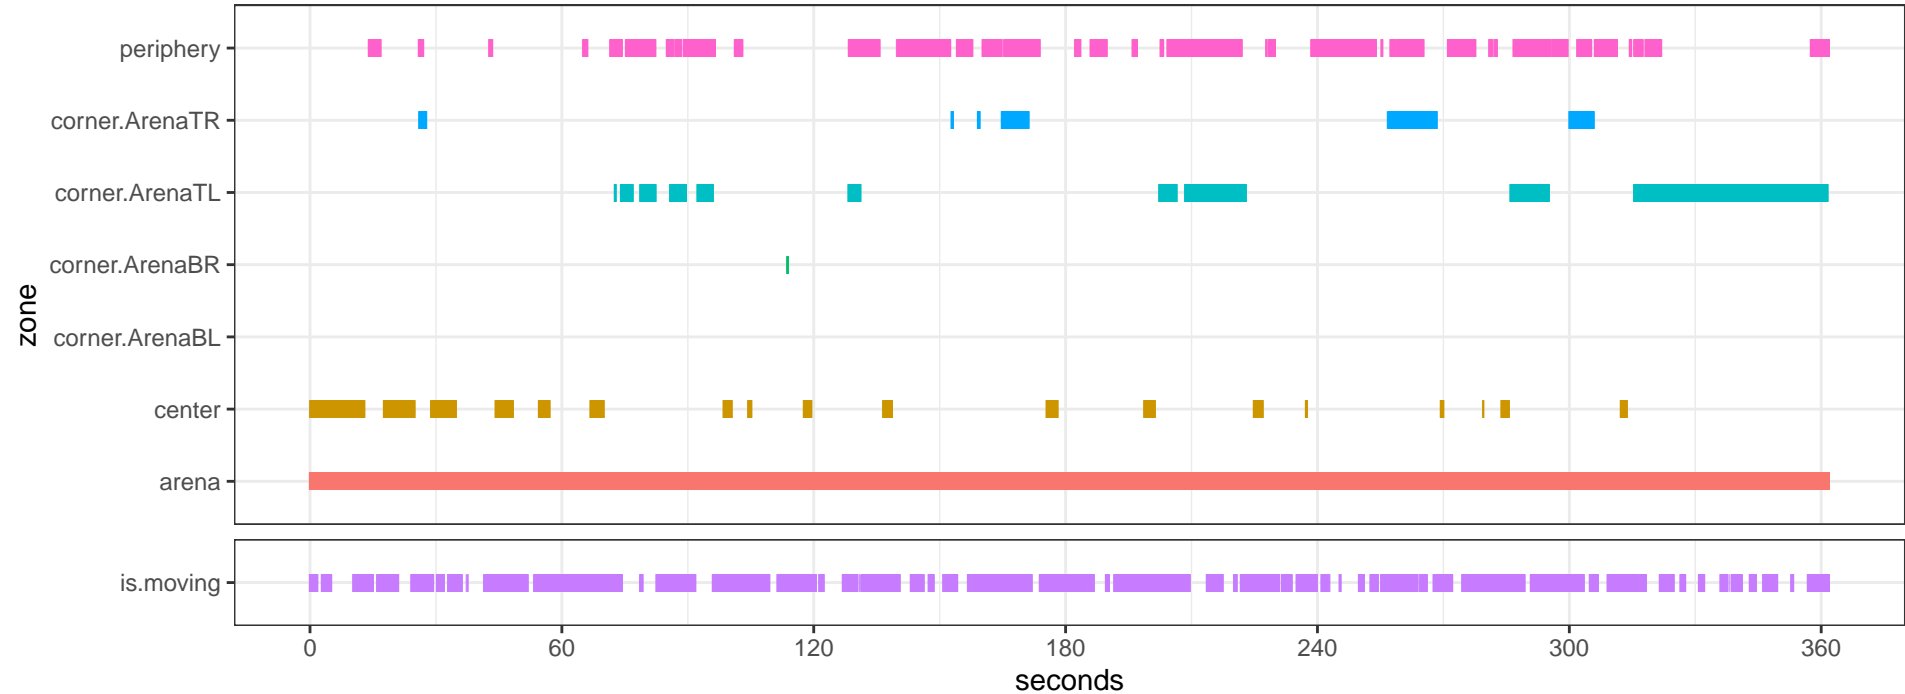

Maus\_34-21\_7\_MAH00859DLC\_resnet50\_OpenFieldDec23shuffle1\_600000\_filtered.csv

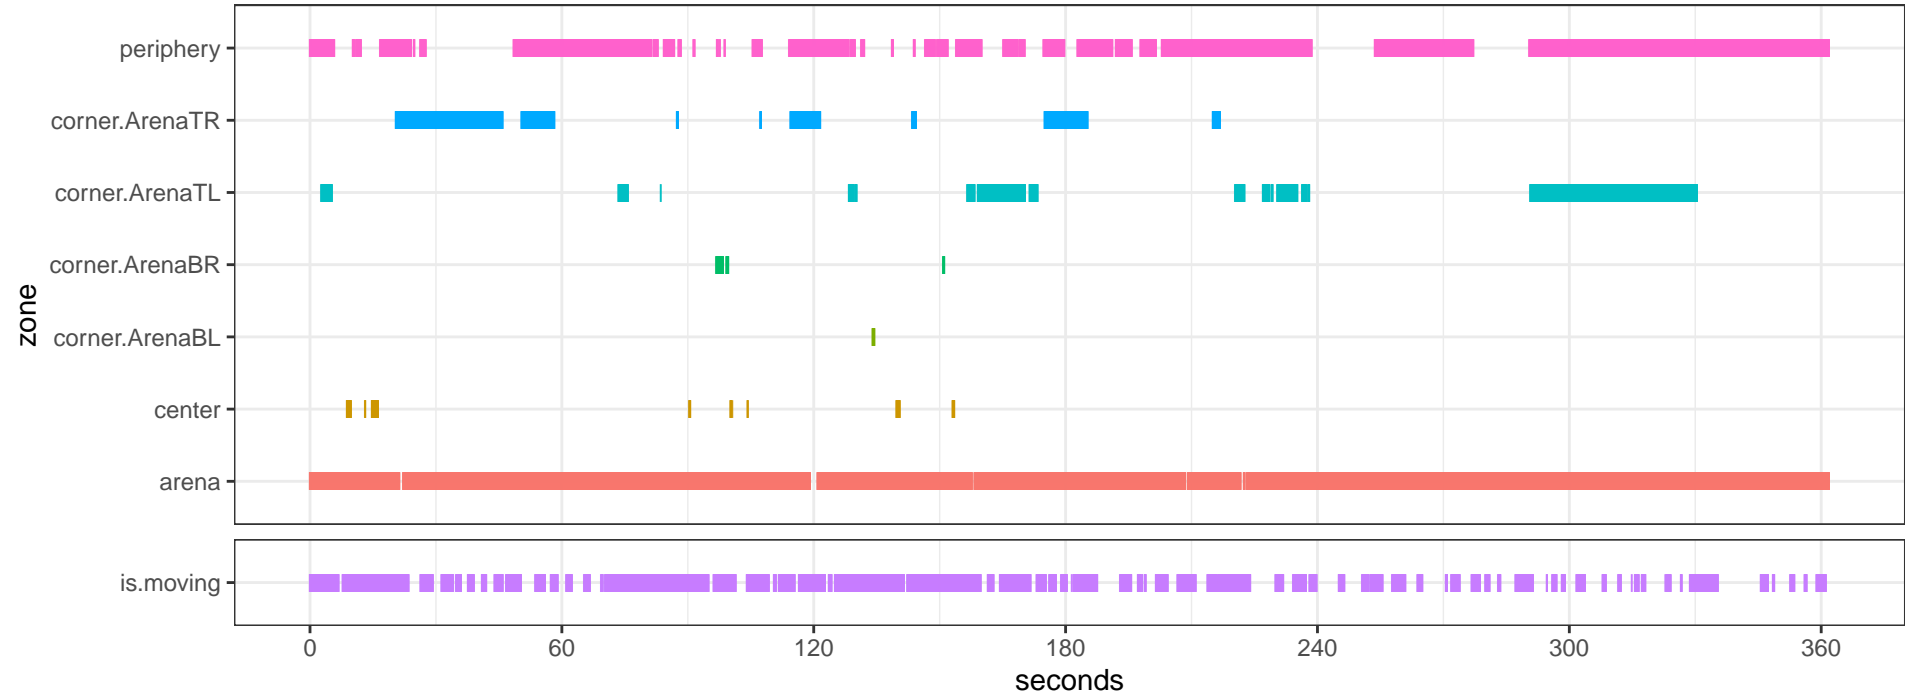



Maus\_35A-20\_LED1\_MAH00335DLC\_resnet50\_OpenFieldDec23shuffle1\_600000\_filtered.csv

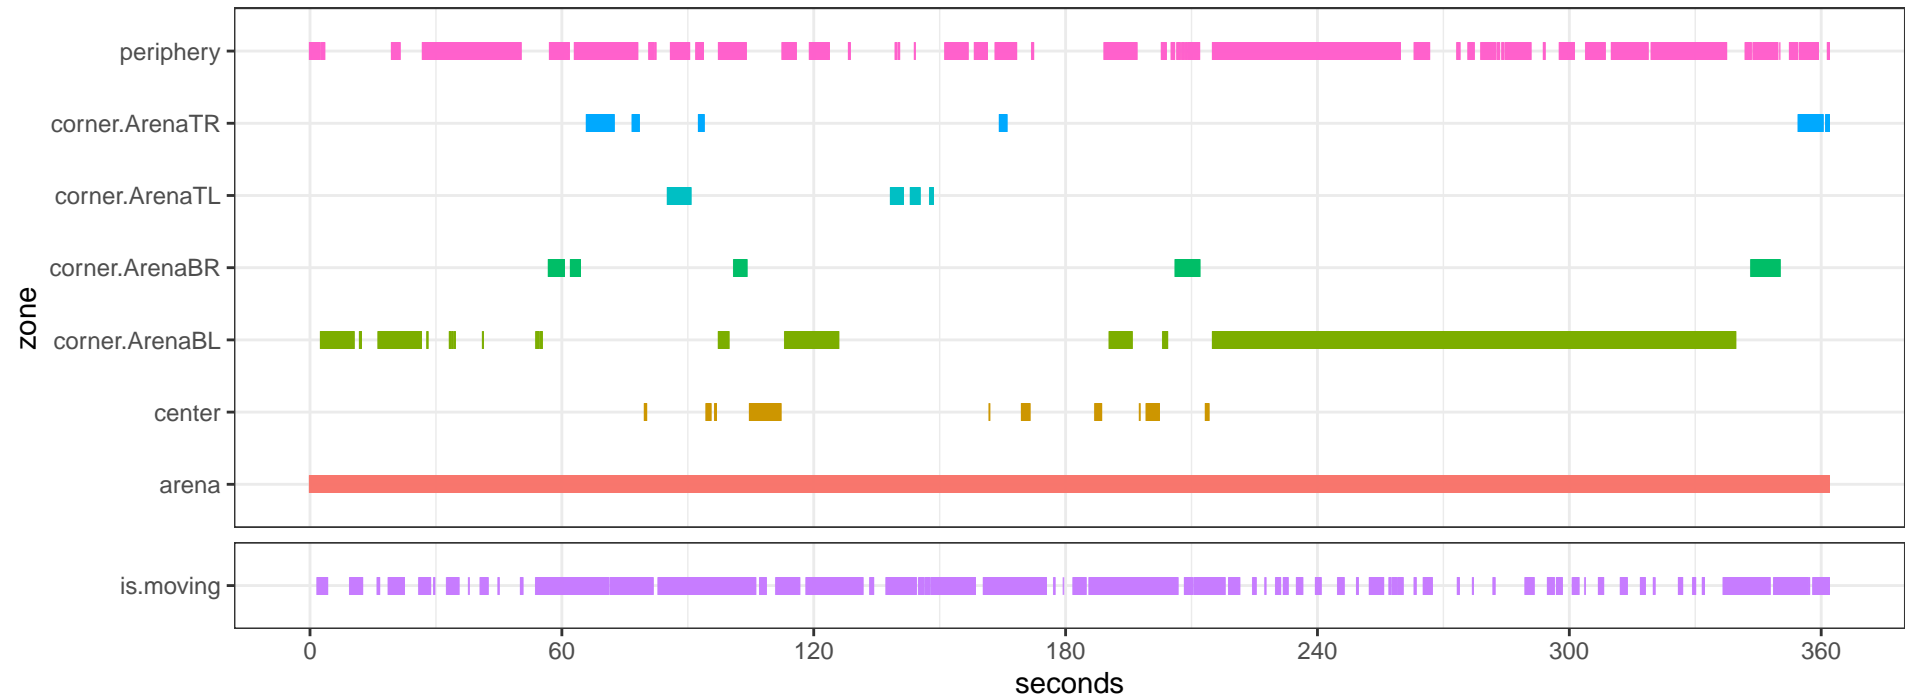

Maus\_35B-20\_LED1\_MAH00339DLC\_resnet50\_OpenFieldDec23shuffle1\_600000\_filtered.csv

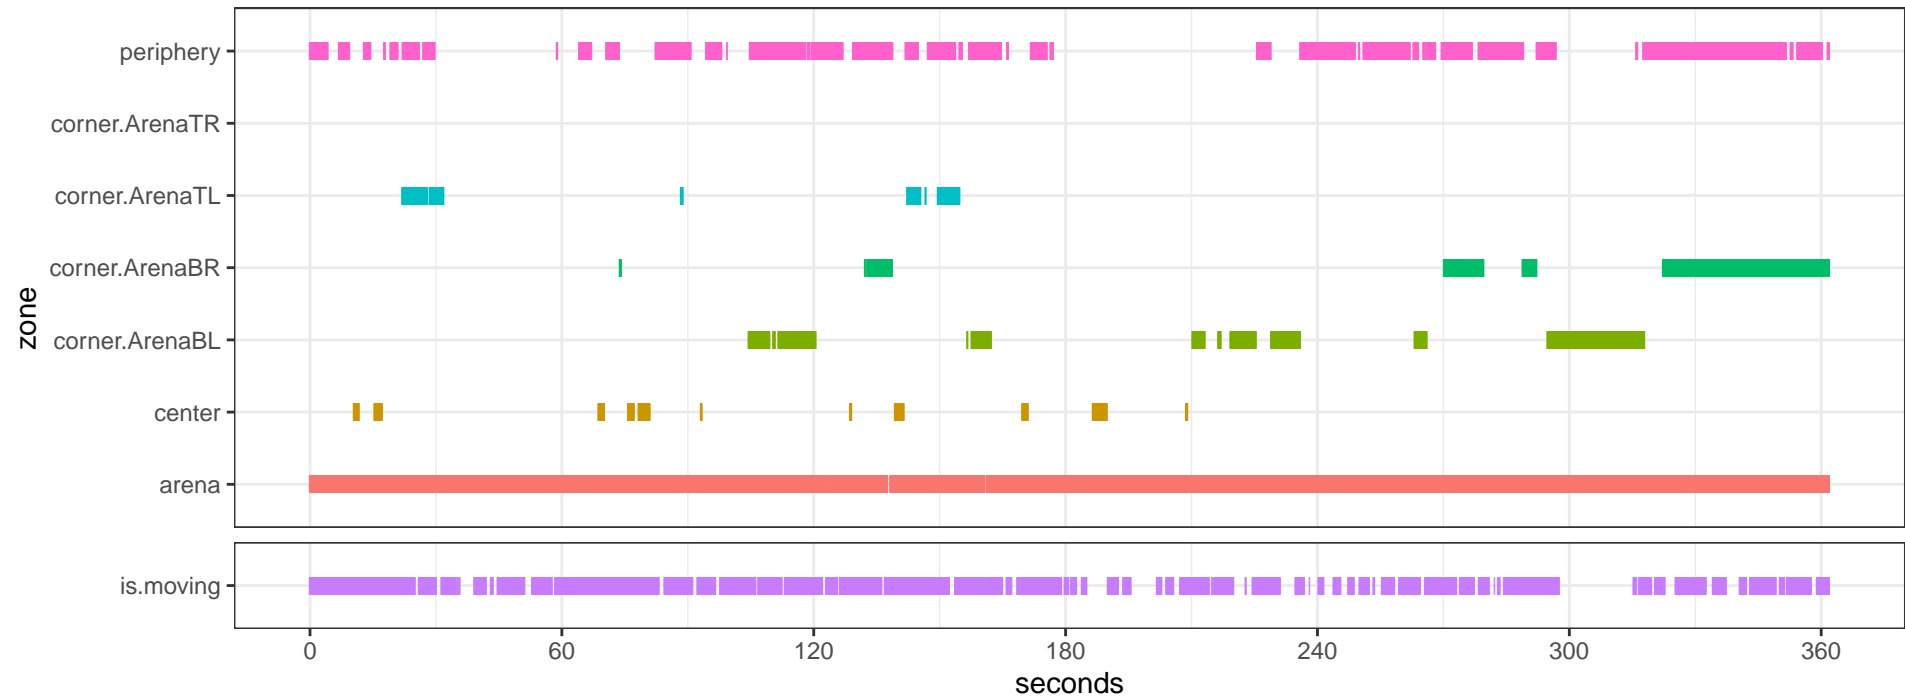

Maus\_35C-20\_LED1\_MAH00336DLC\_resnet50\_OpenFieldDec23shuffle1\_600000\_filtered.csv

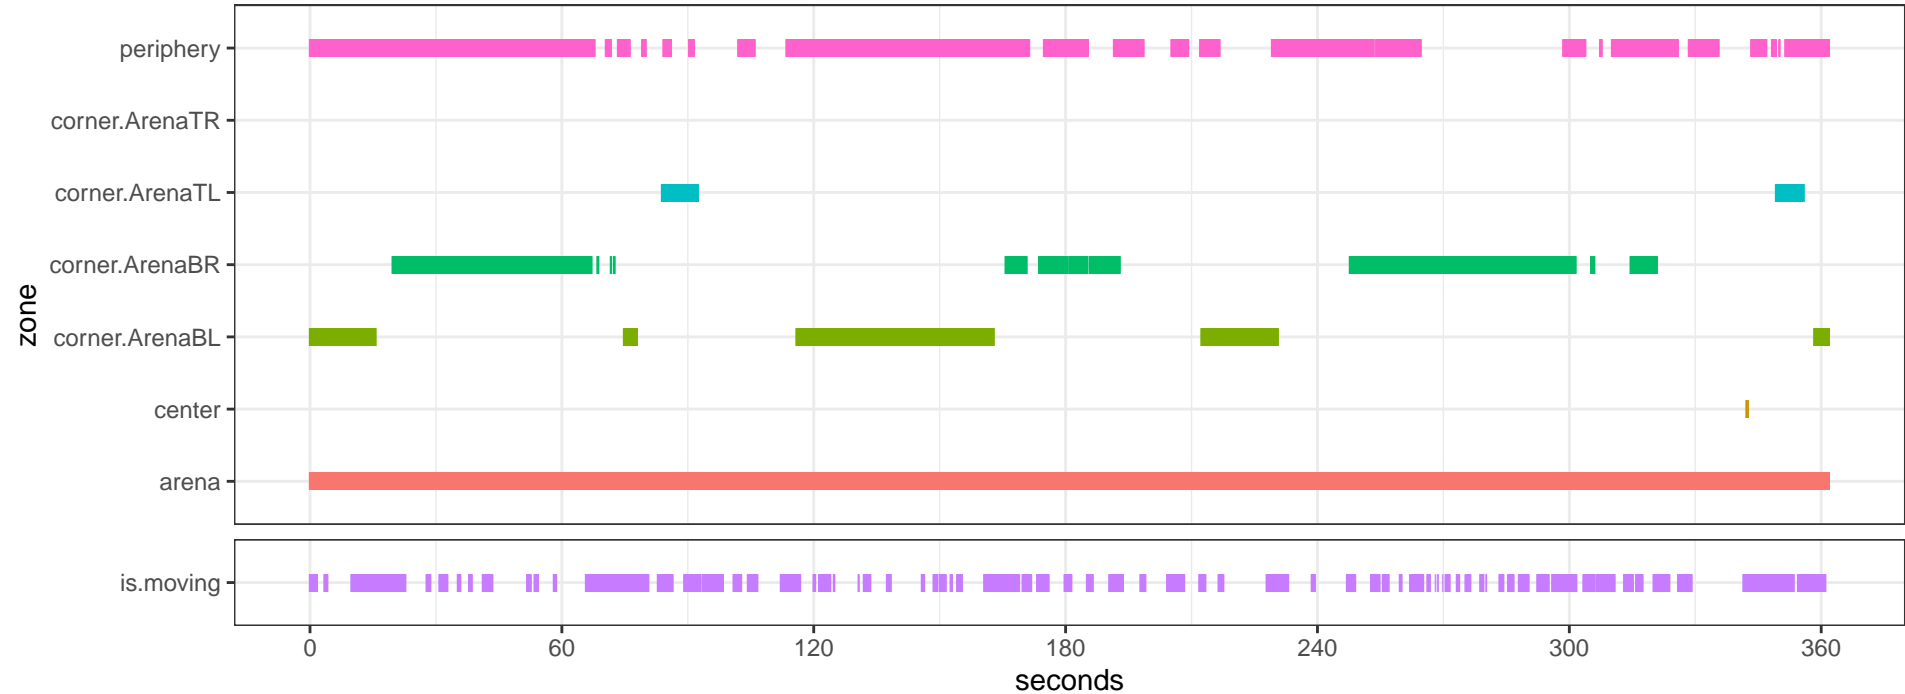

Maus\_35D-20\_LED1\_MAH00337DLC\_resnet50\_OpenFieldDec23shuffle1\_600000\_filtered.csv

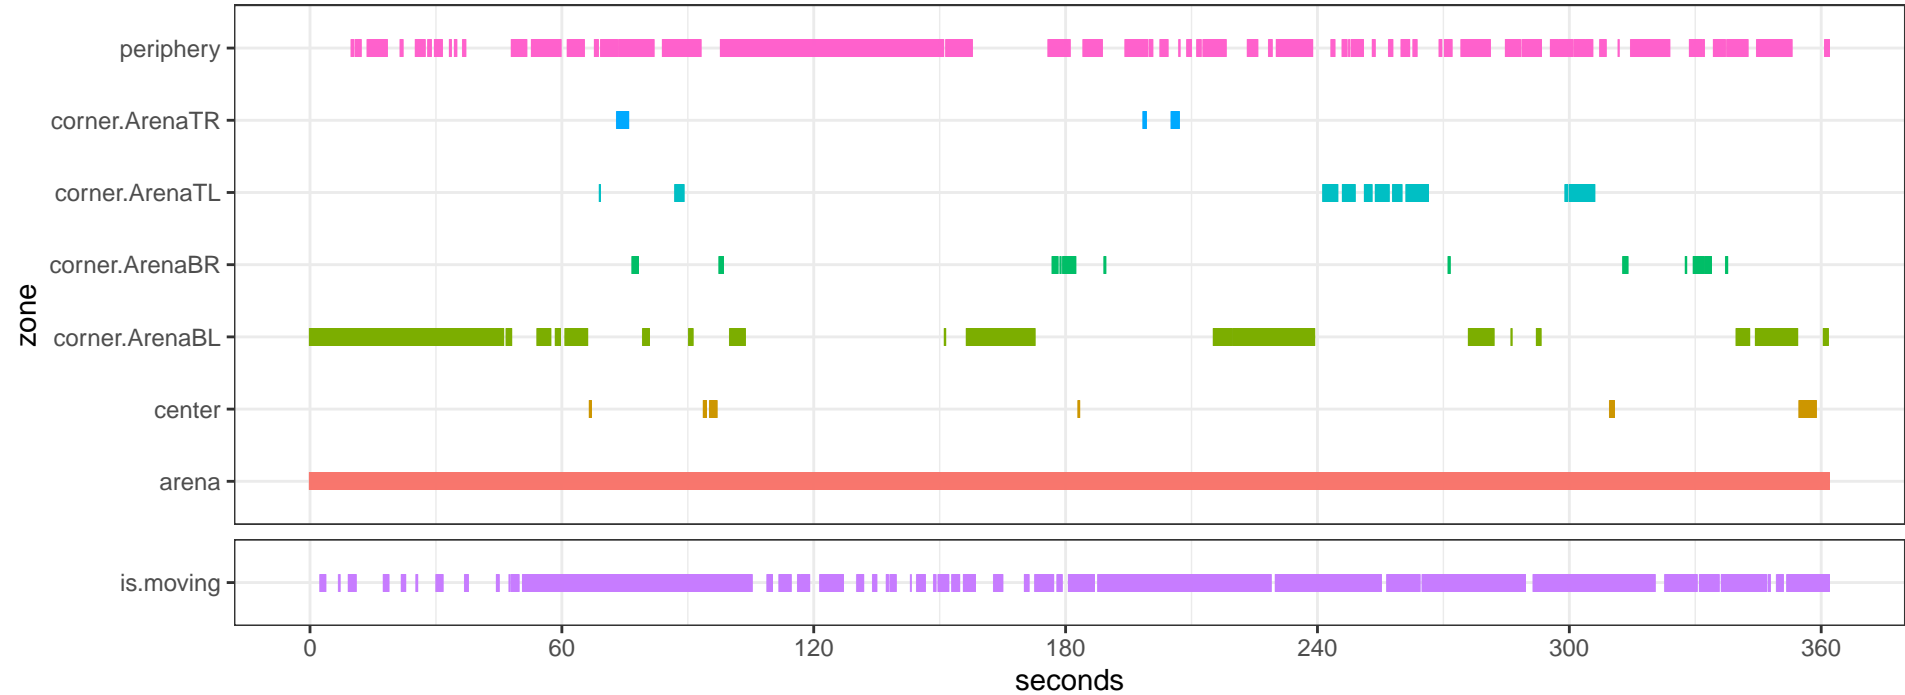

Maus\_35E-20\_LED1\_MAH00338DLC\_resnet50\_OpenFieldDec23shuffle1\_600000\_filtered.csv

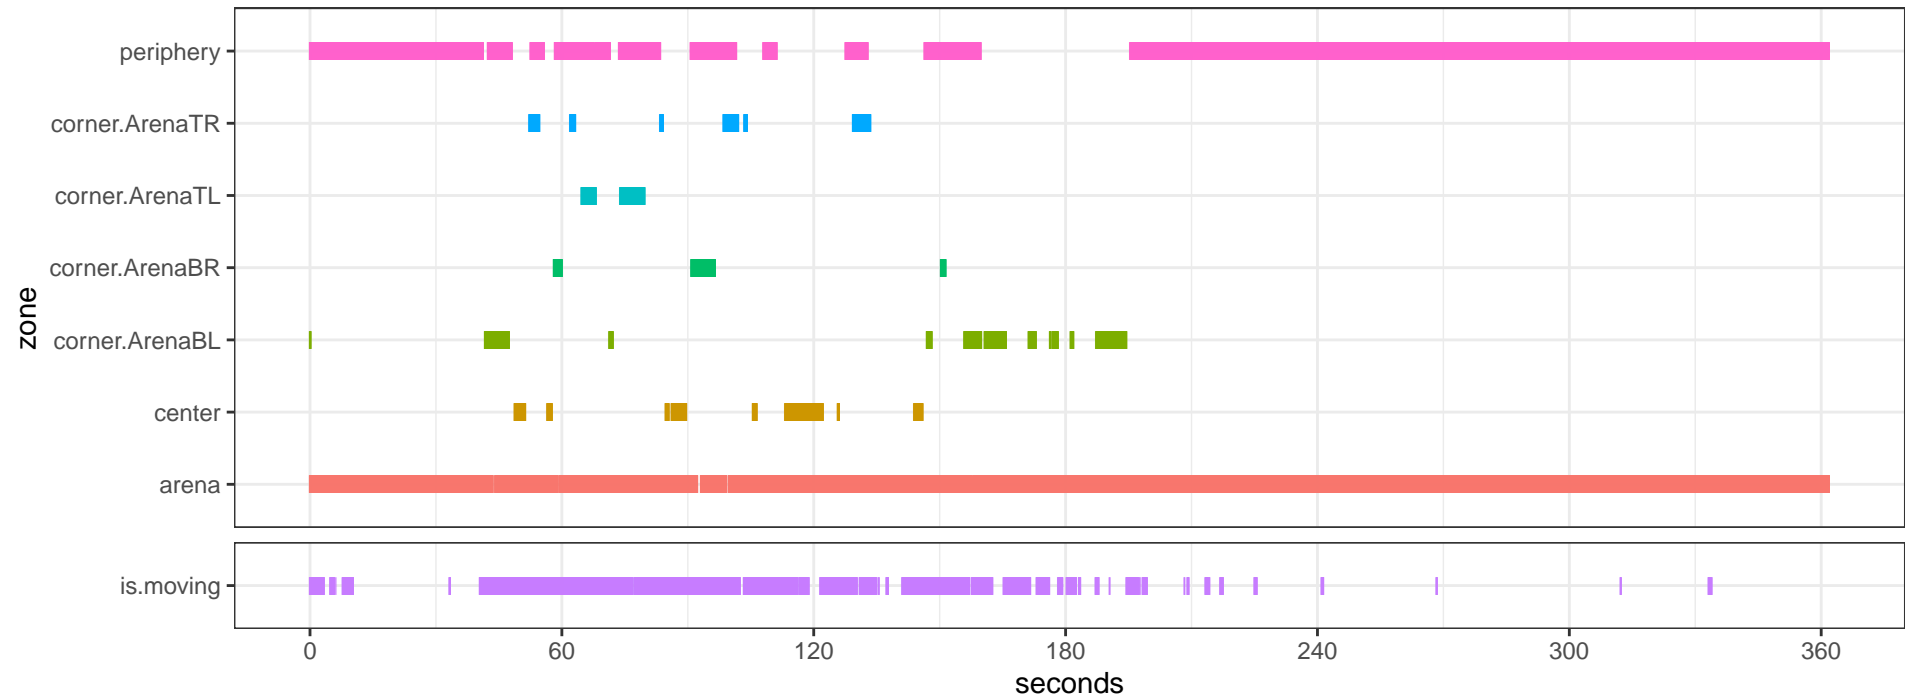

OF\_top\_Opto\_04-LED1DLC\_resnet50\_OpenFieldDec23shuffle1\_600000\_filtered.csv

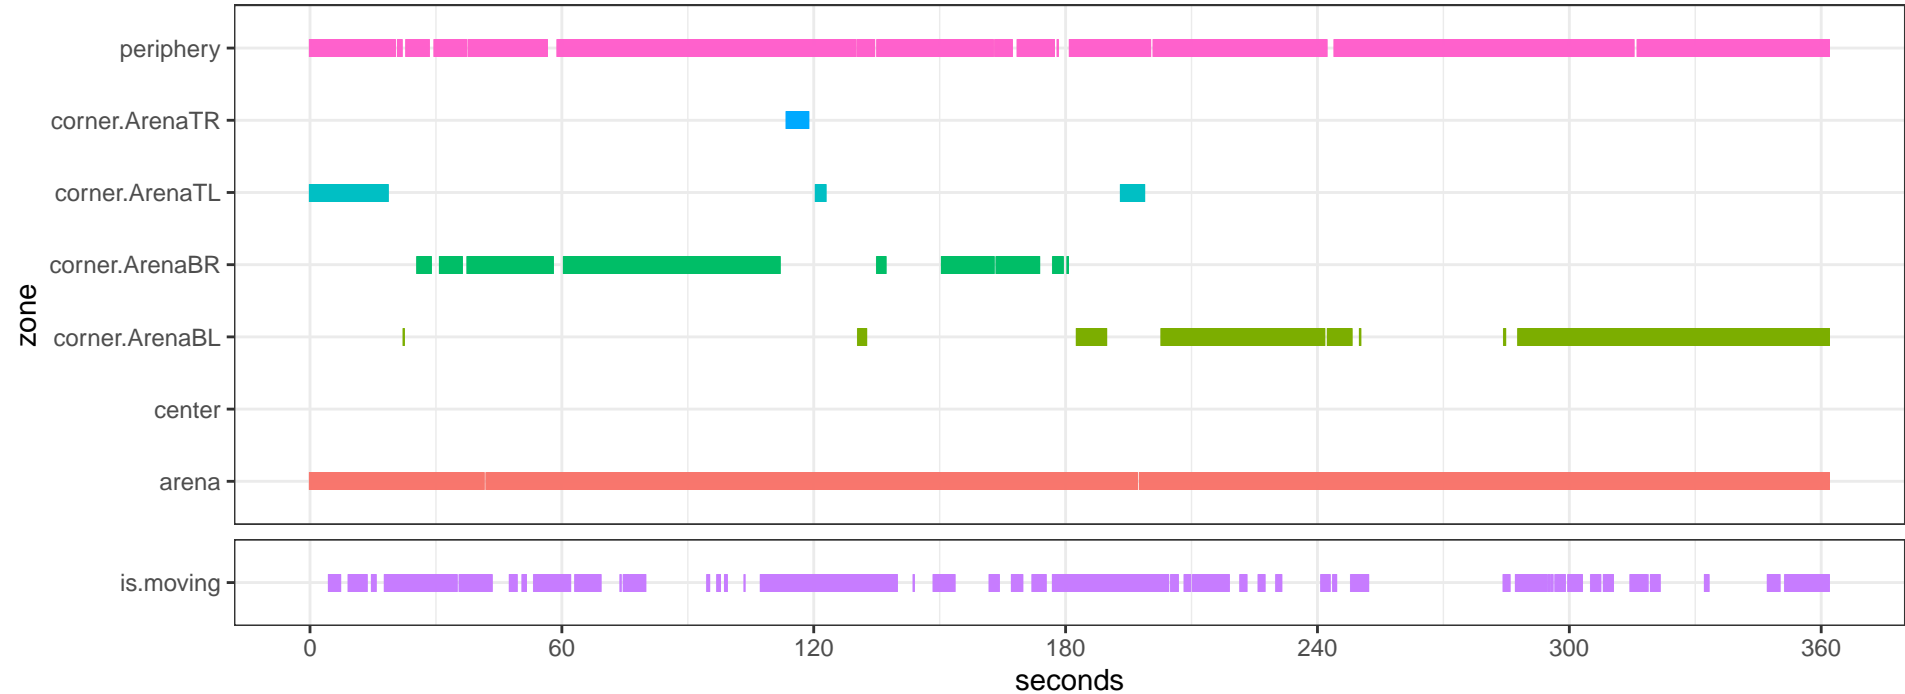

OF\_top\_Opto\_10-LED1DLC\_resnet50\_OpenFieldDec23shuffle1\_600000\_filtered.csv

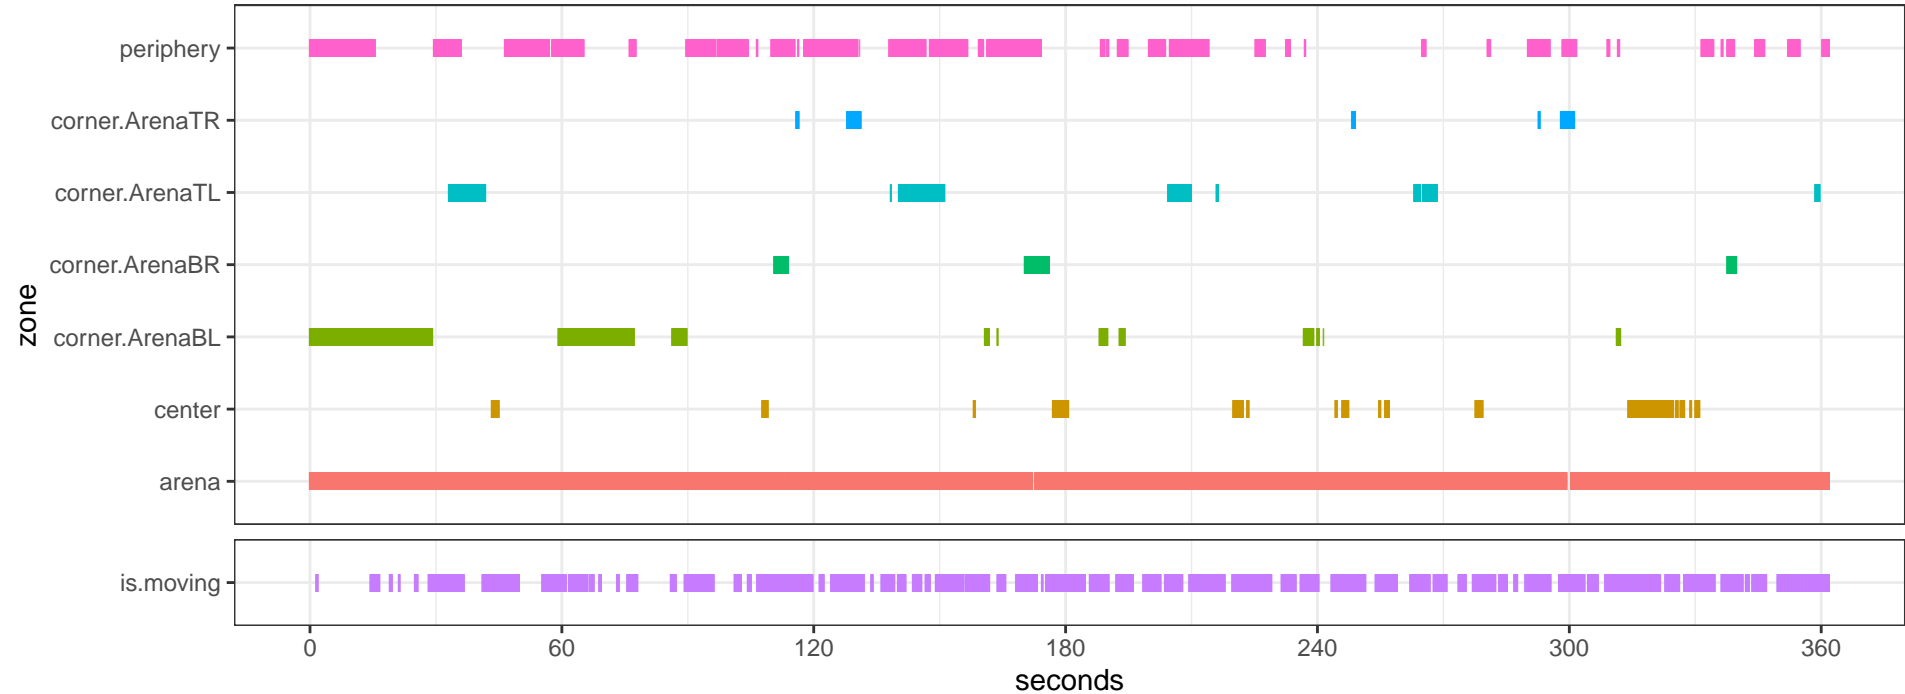

OF\_top\_Opto\_11-LED1DLC\_resnet50\_OpenFieldDec23shuffle1\_600000\_filtered.csv

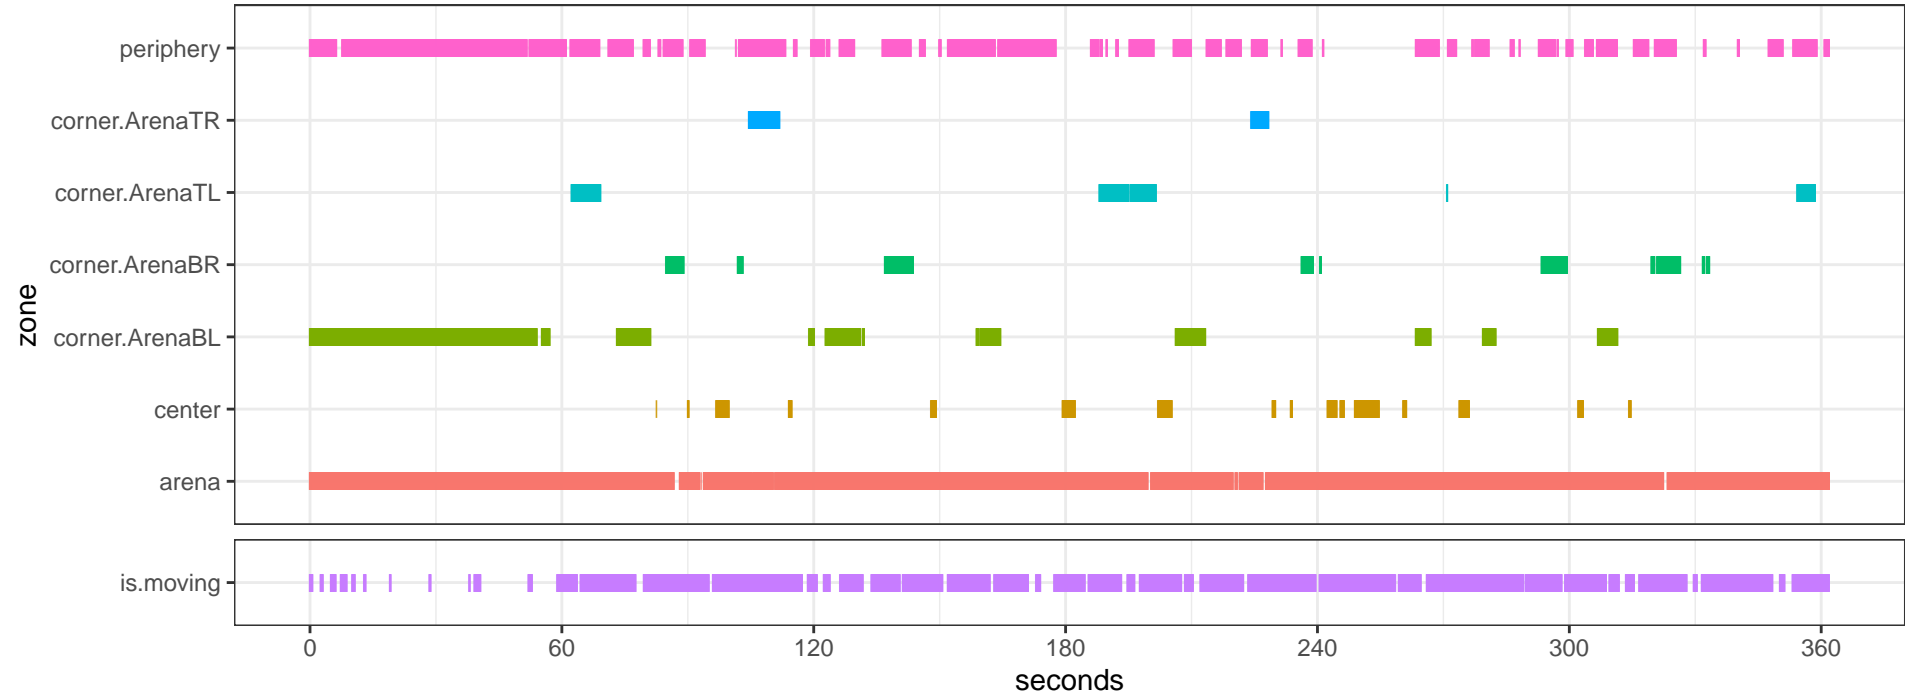



OF\_top\_Opto\_15-LED1DLC\_resnet50\_OpenFieldDec23shuffle1\_600000\_filtered.csv

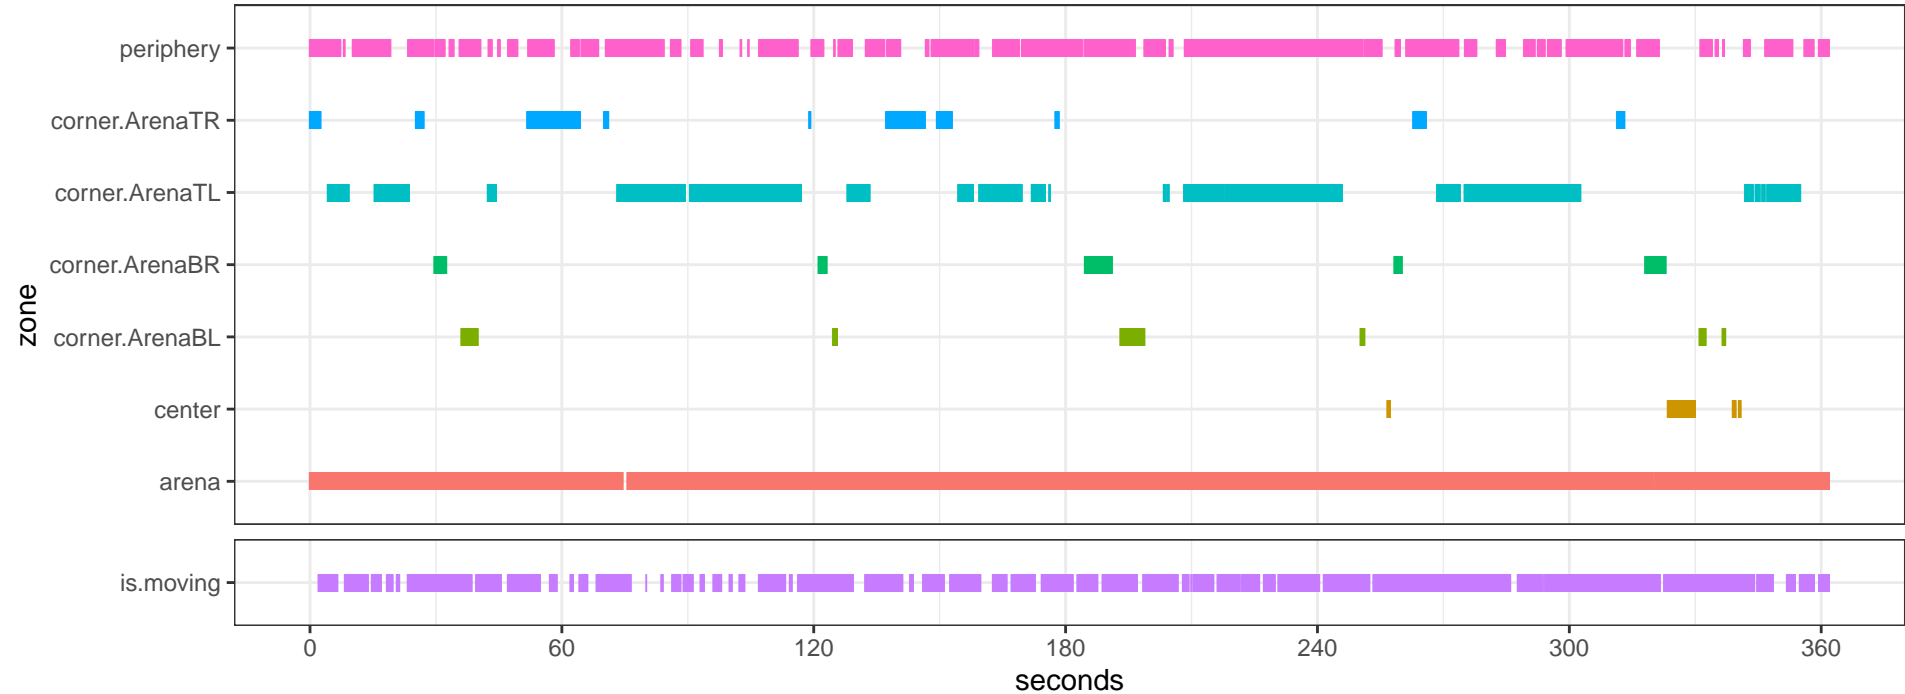

OF\_top\_Opto\_16-LED1DLC\_resnet50\_OpenFieldDec23shuffle1\_600000\_filtered.csv

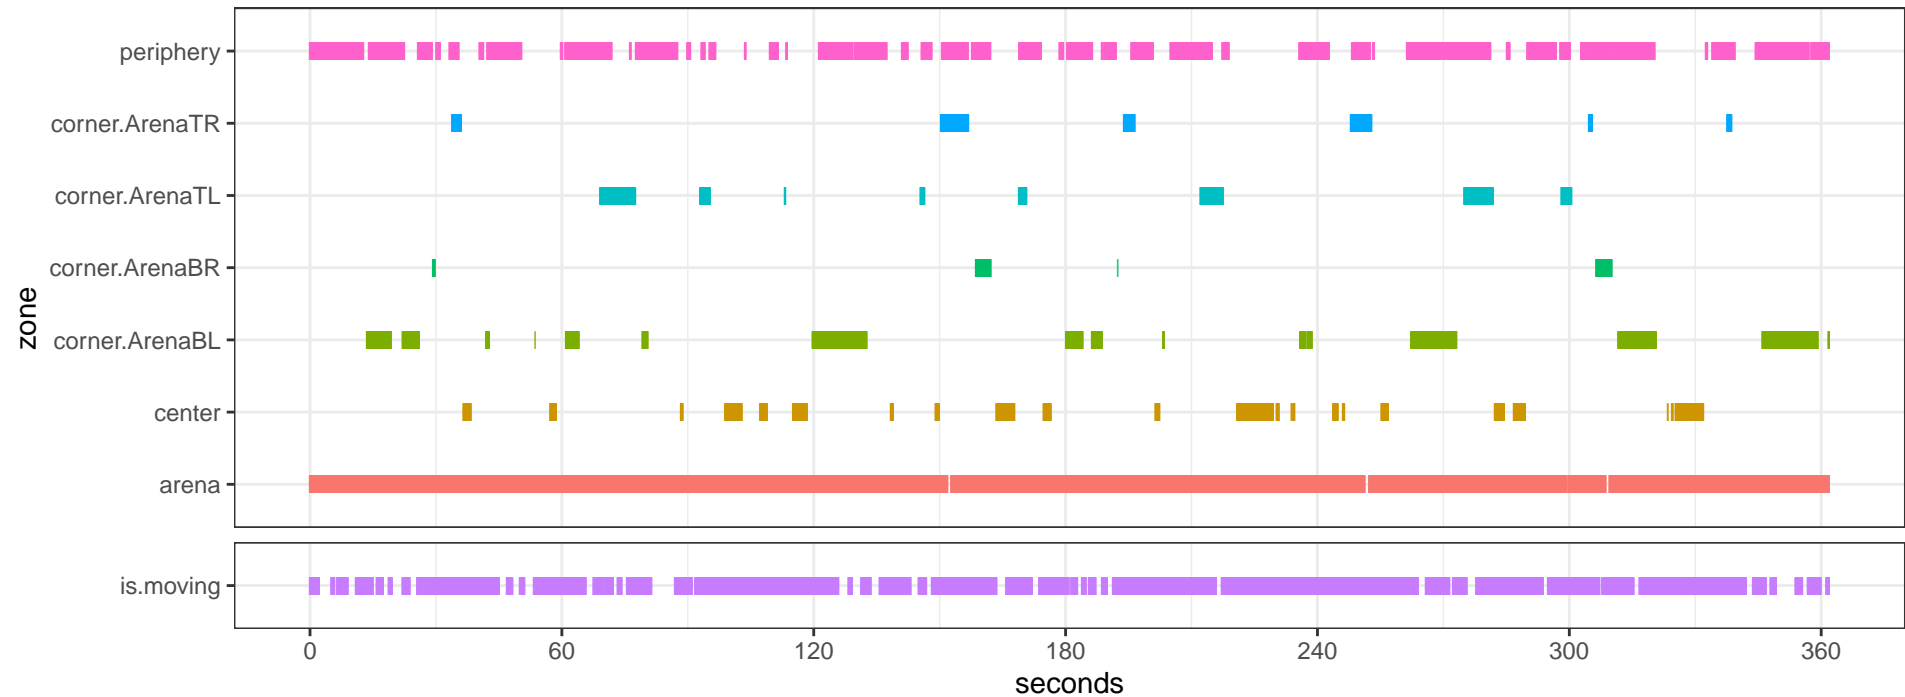

OF\_top\_Opto\_52-LED1DLC\_resnet50\_OpenFieldDec23shuffle1\_600000\_filtered.csv

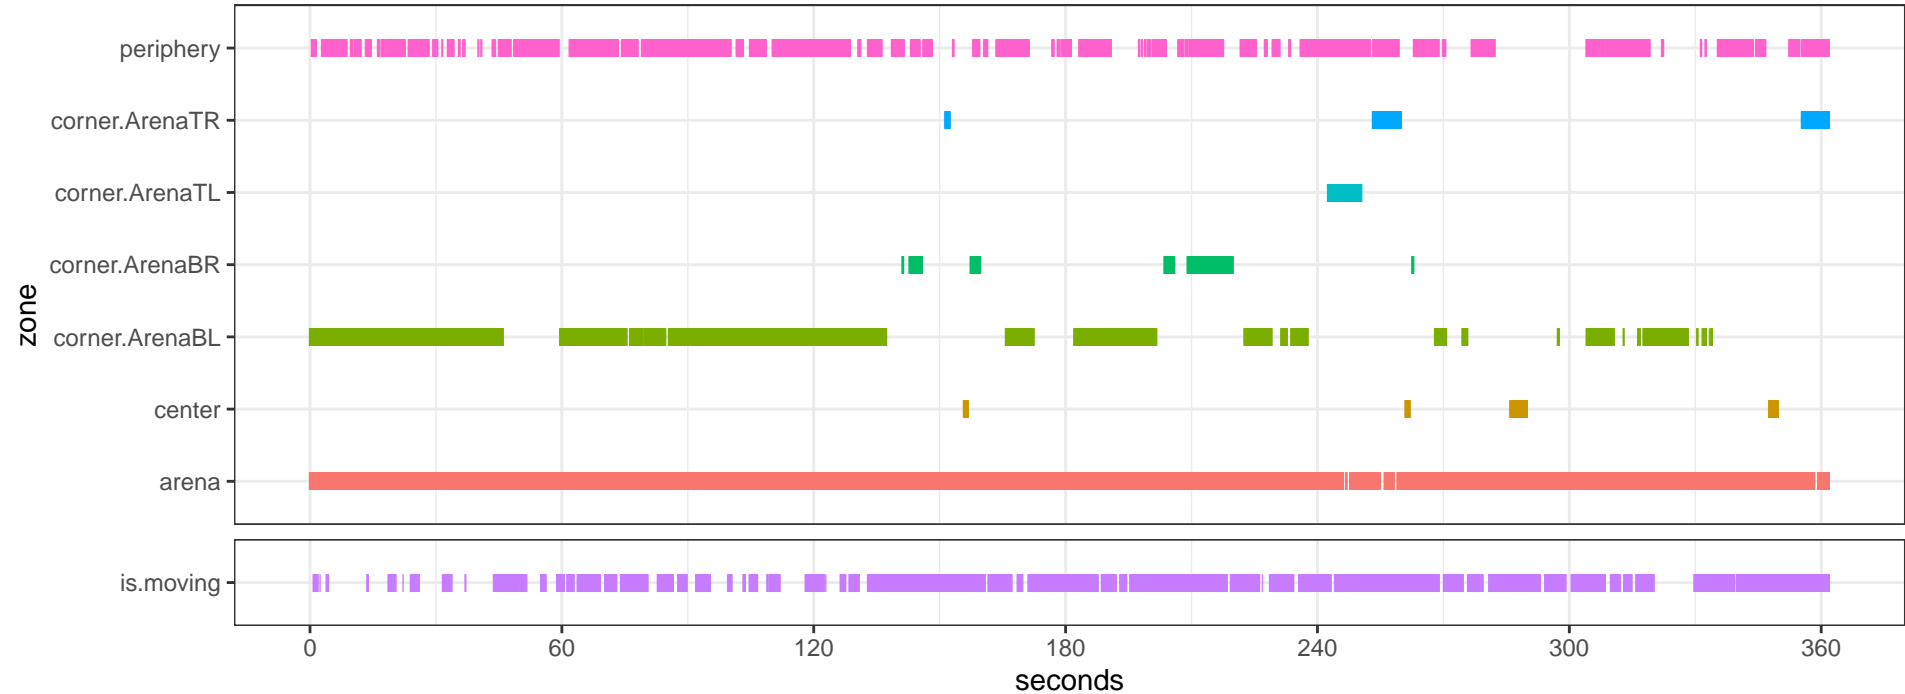

OF\_top\_Opto\_61-LED1DLC\_resnet50\_OpenFieldDec23shuffle1\_600000\_filtered.csv

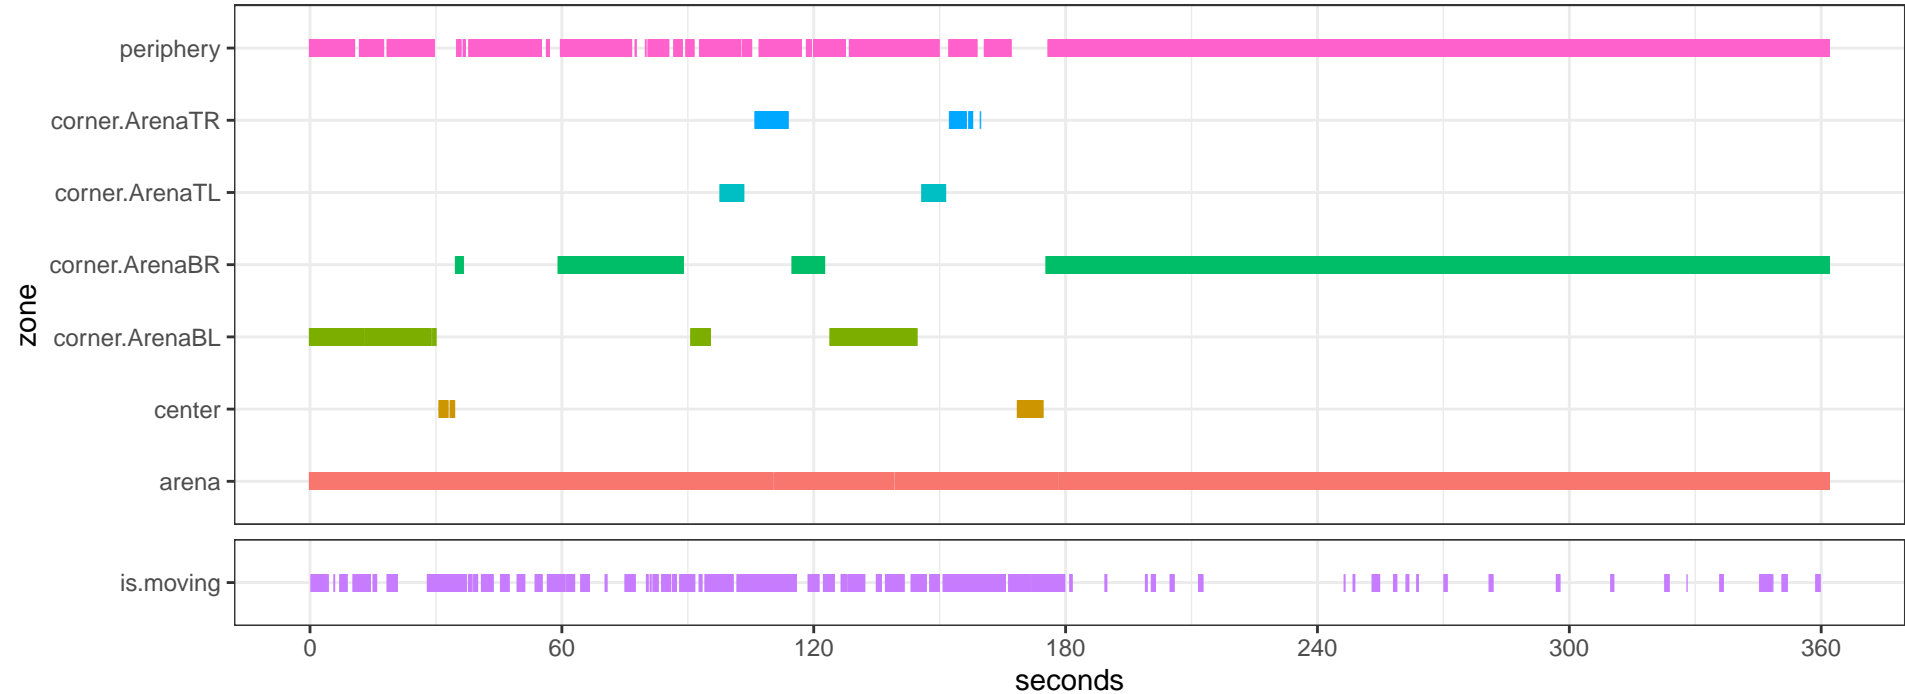

OF\_top\_Opto\_75-LED1DLC\_resnet50\_OpenFieldDec23shuffle1\_600000\_filtered.csv

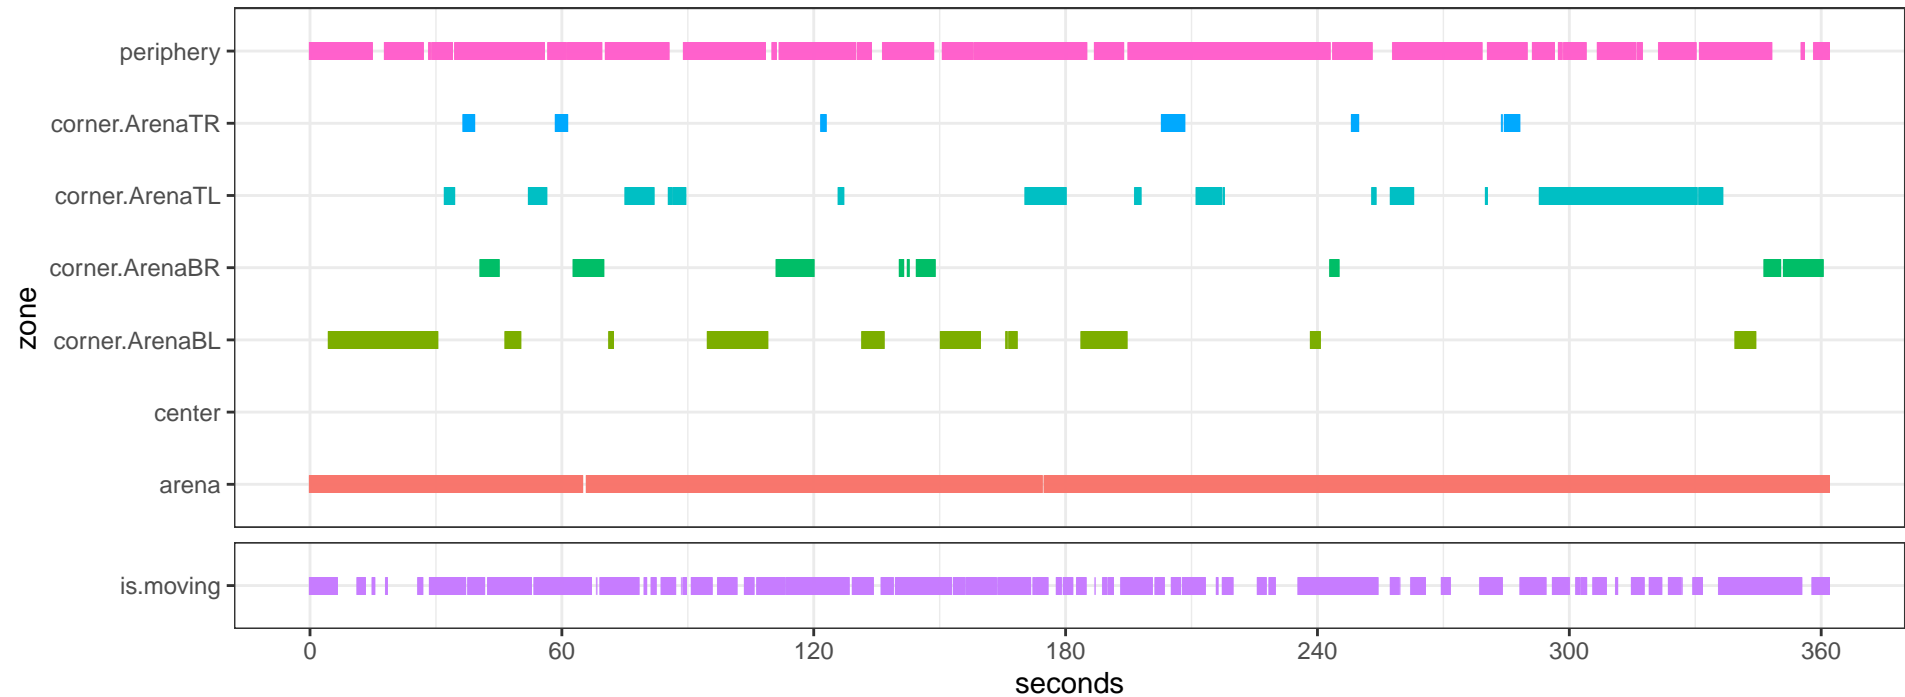

OF\_top\_Opto\_76-LED1DLC\_resnet50\_OpenFieldDec23shuffle1\_600000\_filtered.csv

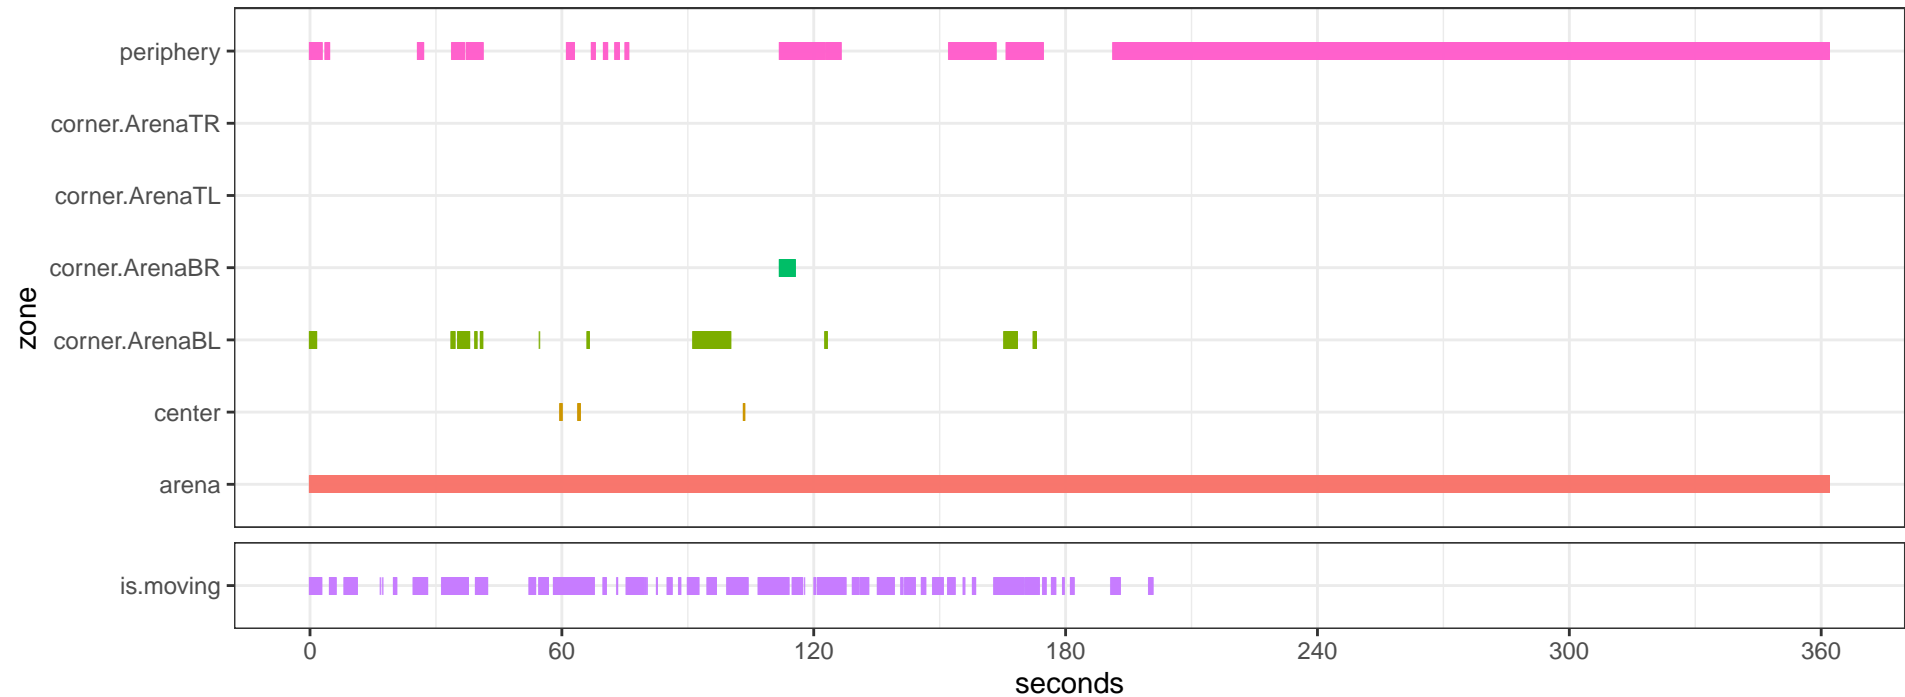

OF\_top\_Opto\_77-LED1DLC\_resnet50\_OpenFieldDec23shuffle1\_600000\_filtered.csv

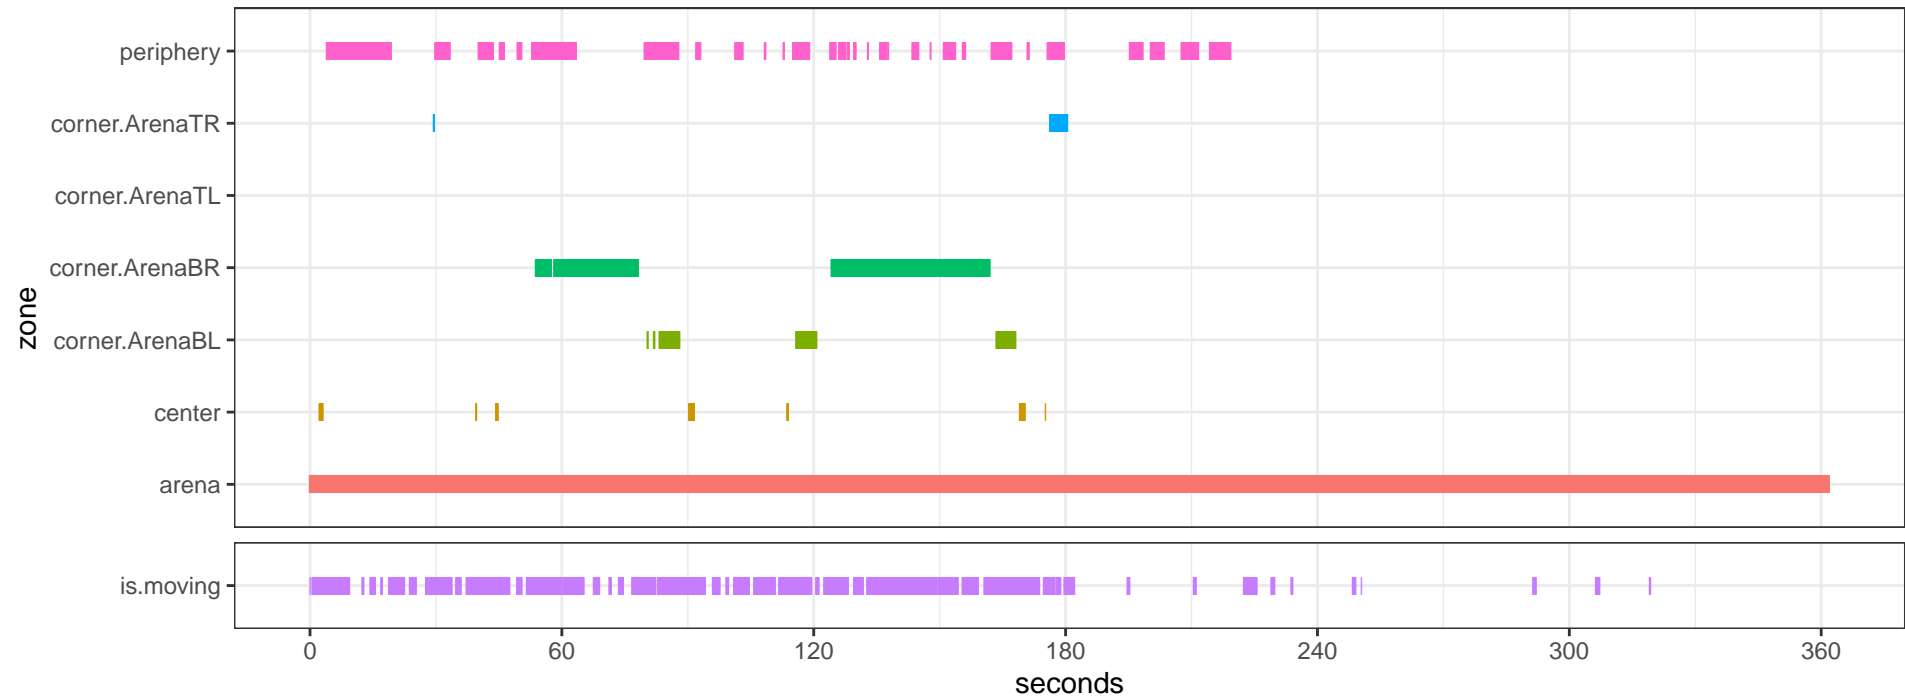

Supplement: supp4 [file elife-86737-supp4-v1.pdf]
