# Supplementary material for: Chemo- and optogenetic activation of hypothalamic Foxb1-expressing neurons and their terminal endings in the rostral-dorsolateral PAG leads to tachypnea, bradycardia, and immobility
Source: PubMed Central journal article supplement (PMC10945554; doi:10.7554/elife.86737), 2024-02-01

OF\_top\_DREADD\_21-BL1DLC\_resnet50\_OpenFieldDec23shuffle1\_600000\_filtered.csv

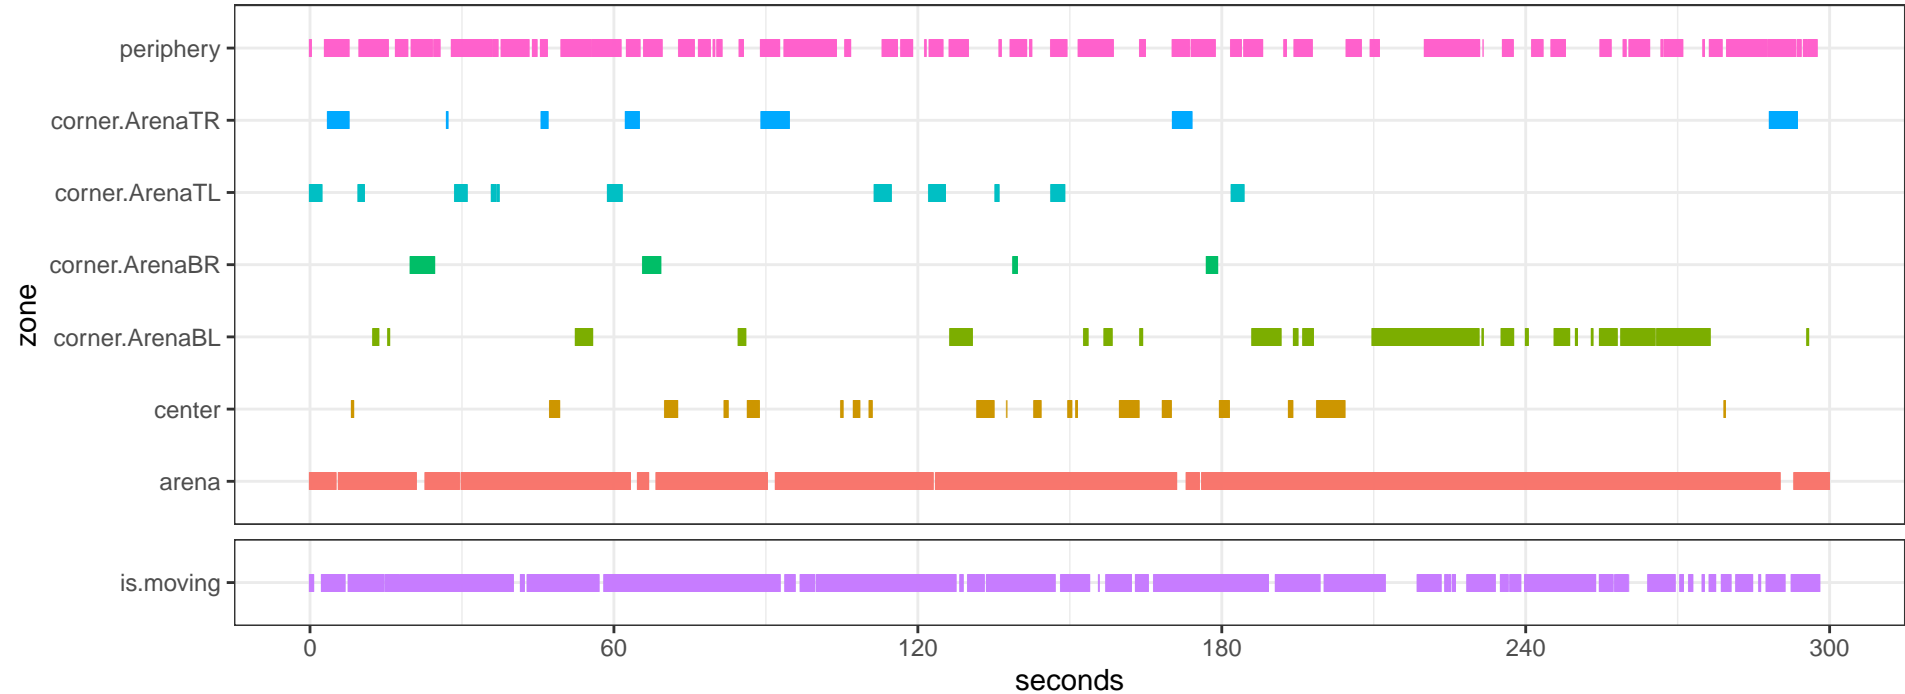

OF\_top\_DREADD\_21-BL2DLC\_resnet50\_OpenFieldDec23shuffle1\_600000\_filtered.csv

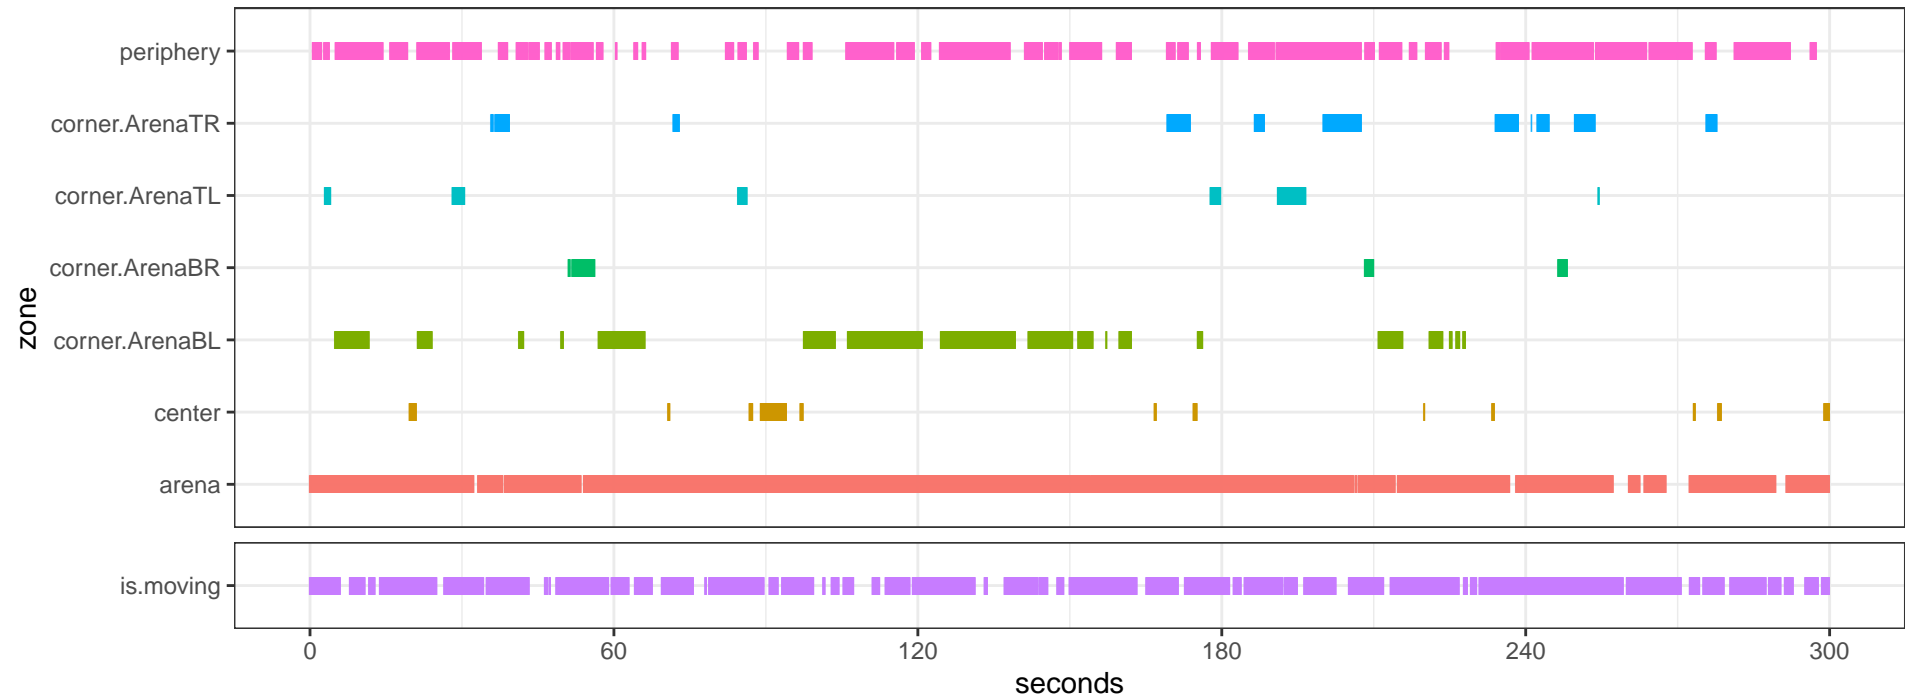

OF\_top\_DREADD\_21-Clo1DLC\_resnet50\_OpenFieldDec23shuffle1\_600000\_filtered.csv

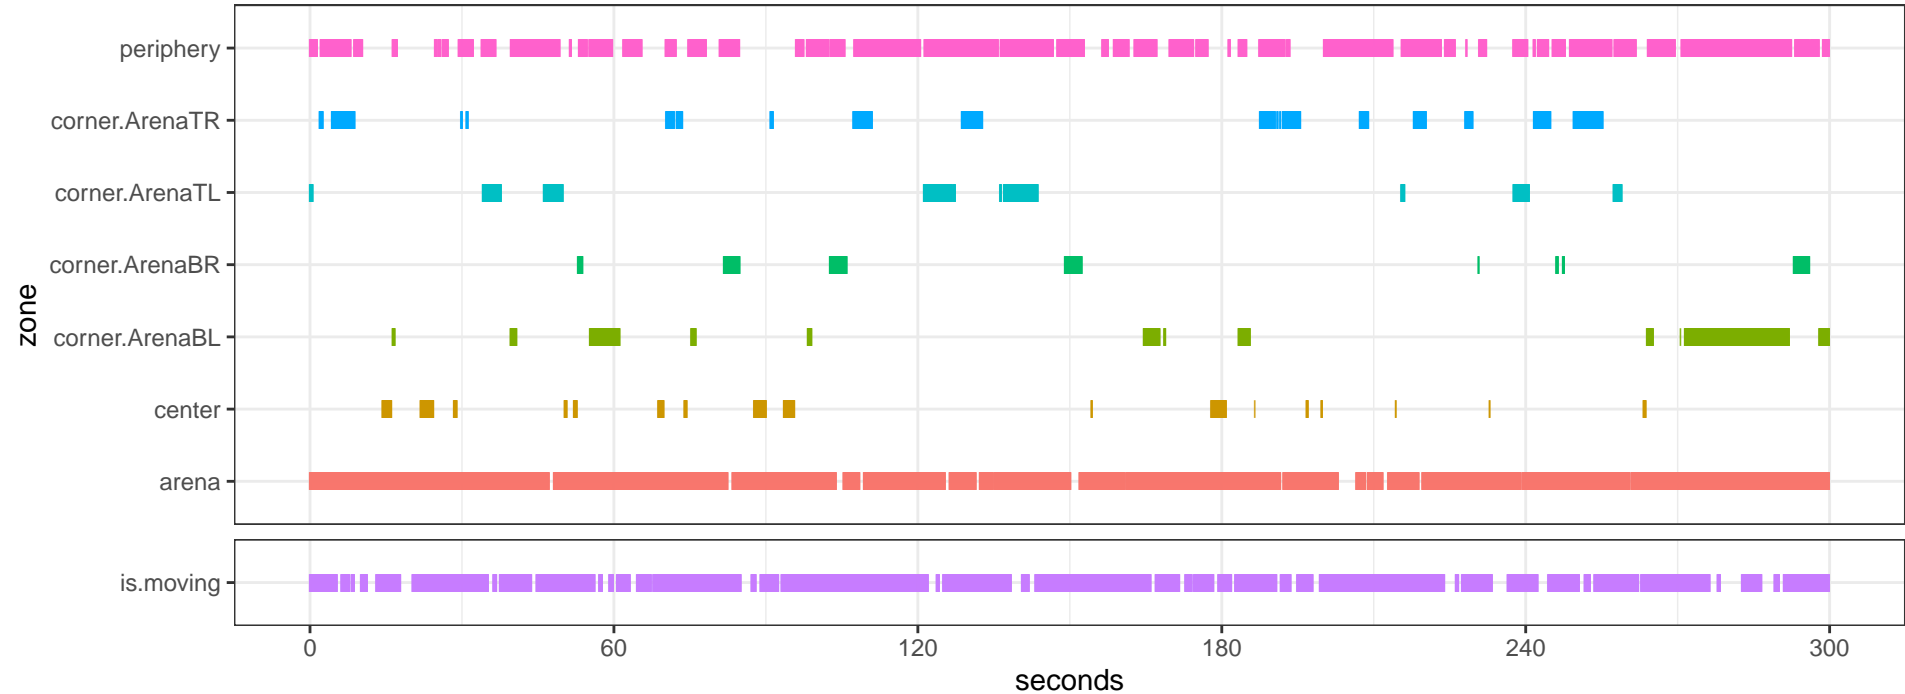

OF\_top\_DREADD\_21-Clo2DLC\_resnet50\_OpenFieldDec23shuffle1\_600000\_filtered.csv

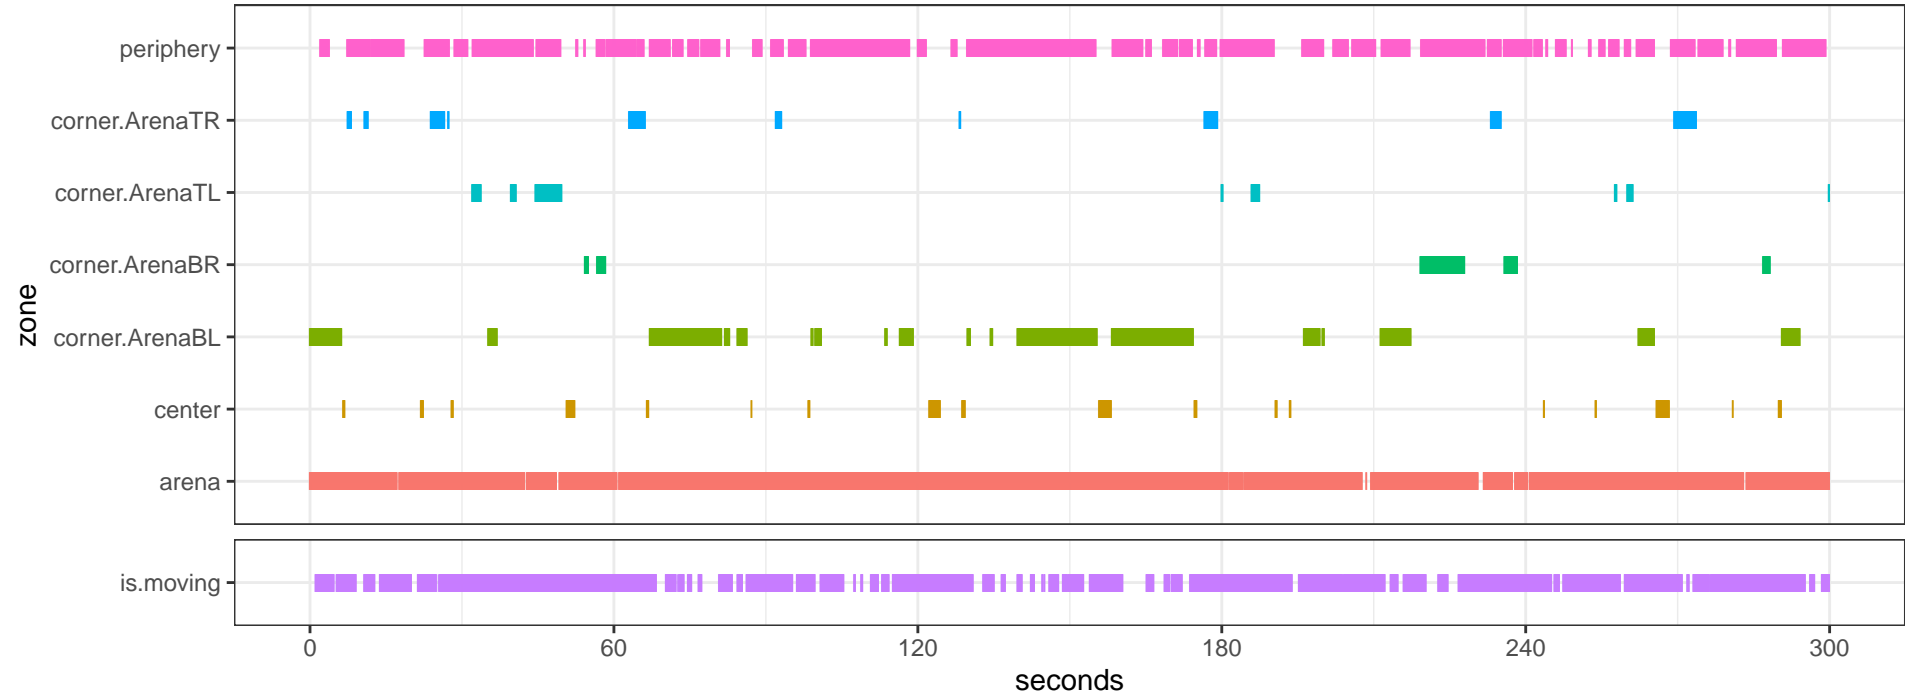

OF\_top\_DREADD\_22-BL1DLC\_resnet50\_OpenFieldDec23shuffle1\_600000\_filtered.csv

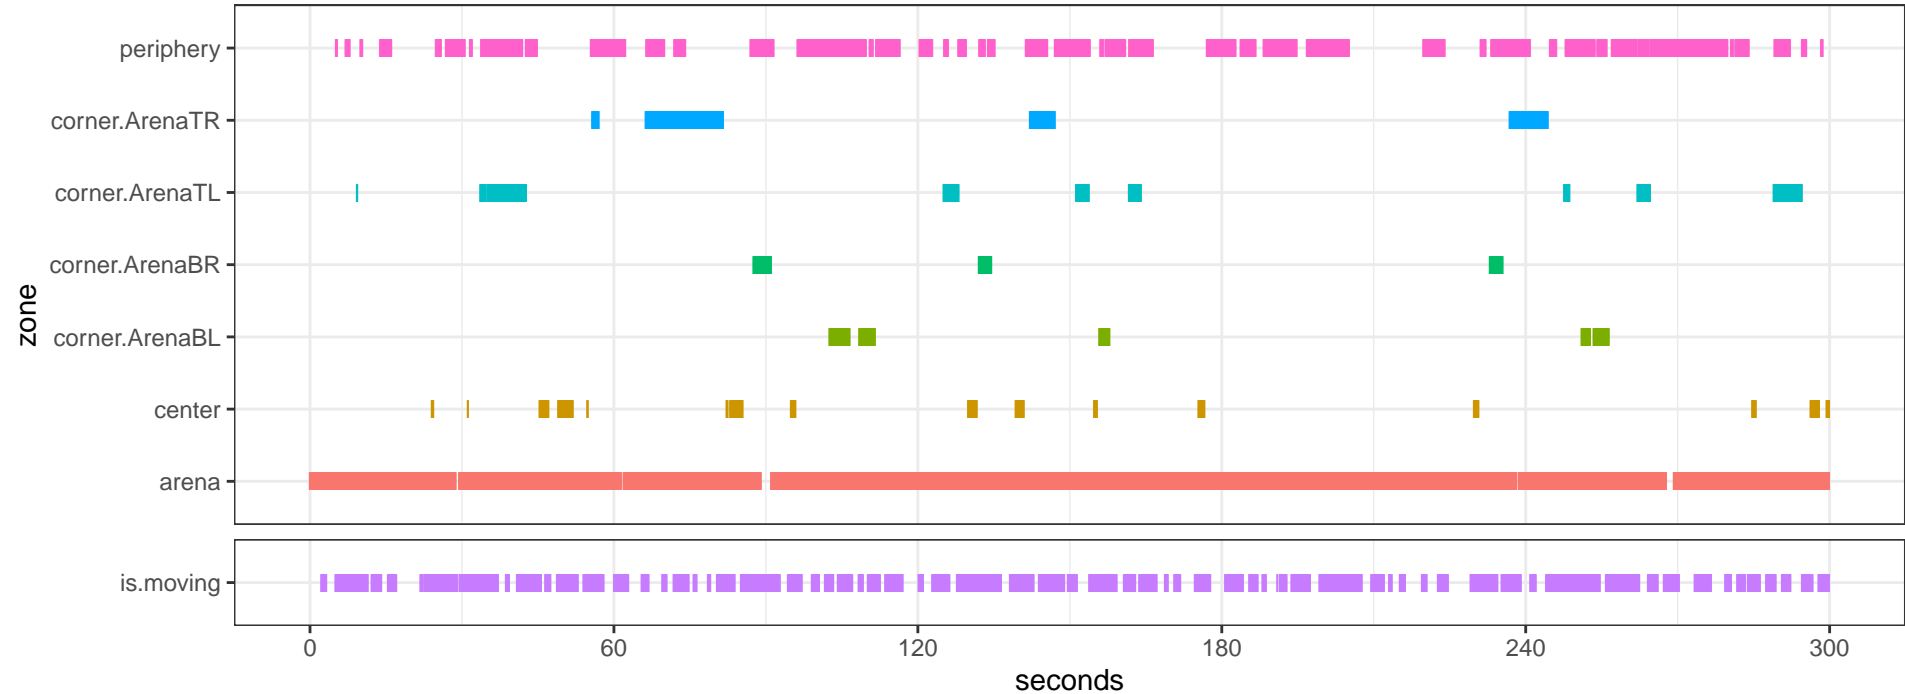

OF\_top\_DREADD\_22-BL2DLC\_resnet50\_OpenFieldDec23shuffle1\_600000\_filtered.csv

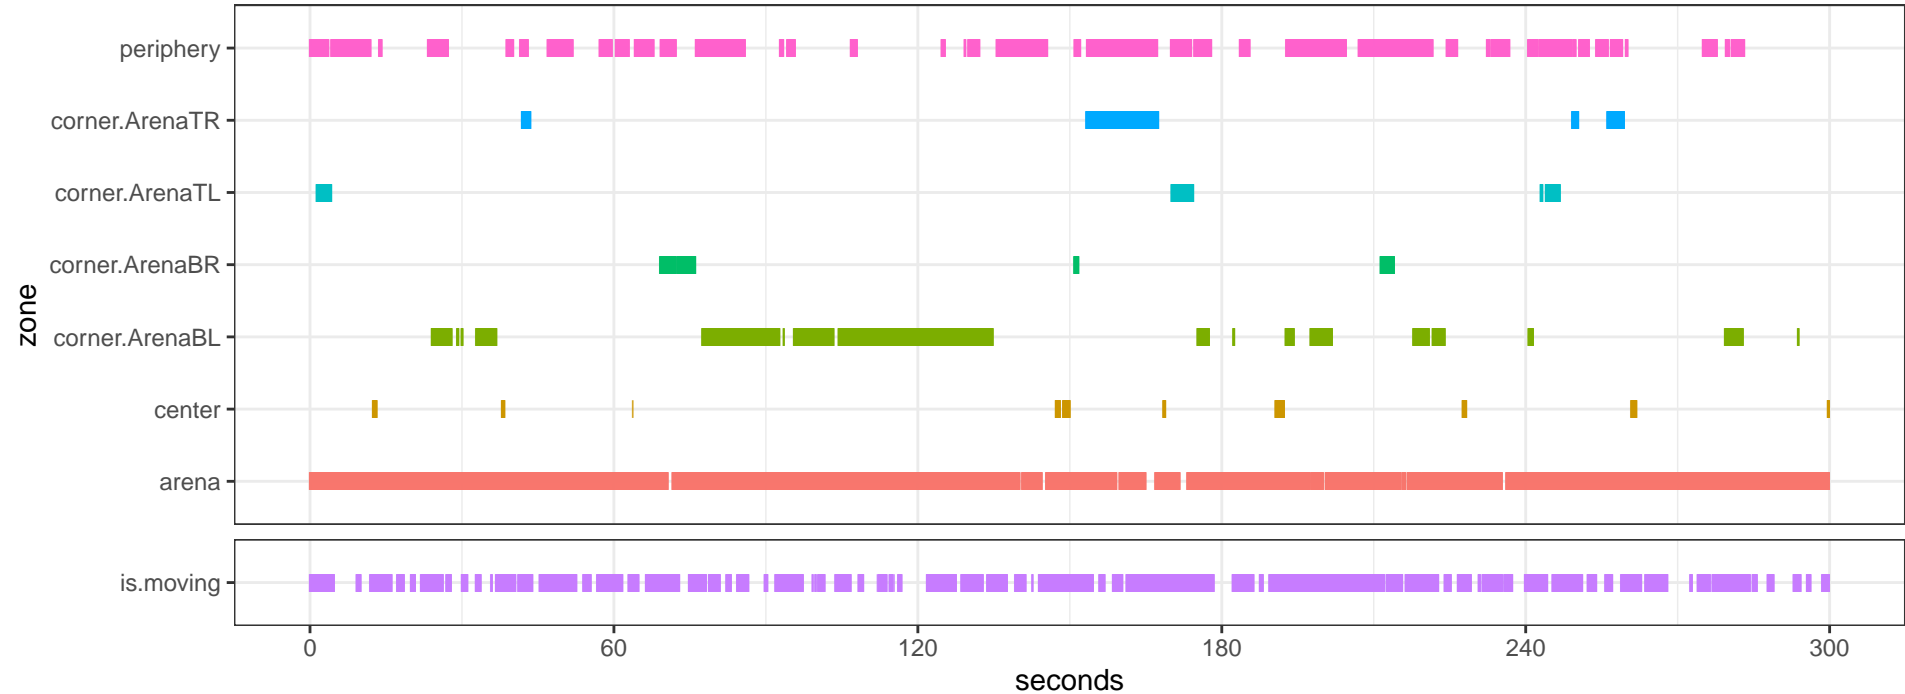

OF\_top\_DREADD\_22-Clo1DLC\_resnet50\_OpenFieldDec23shuffle1\_600000\_filtered.csv

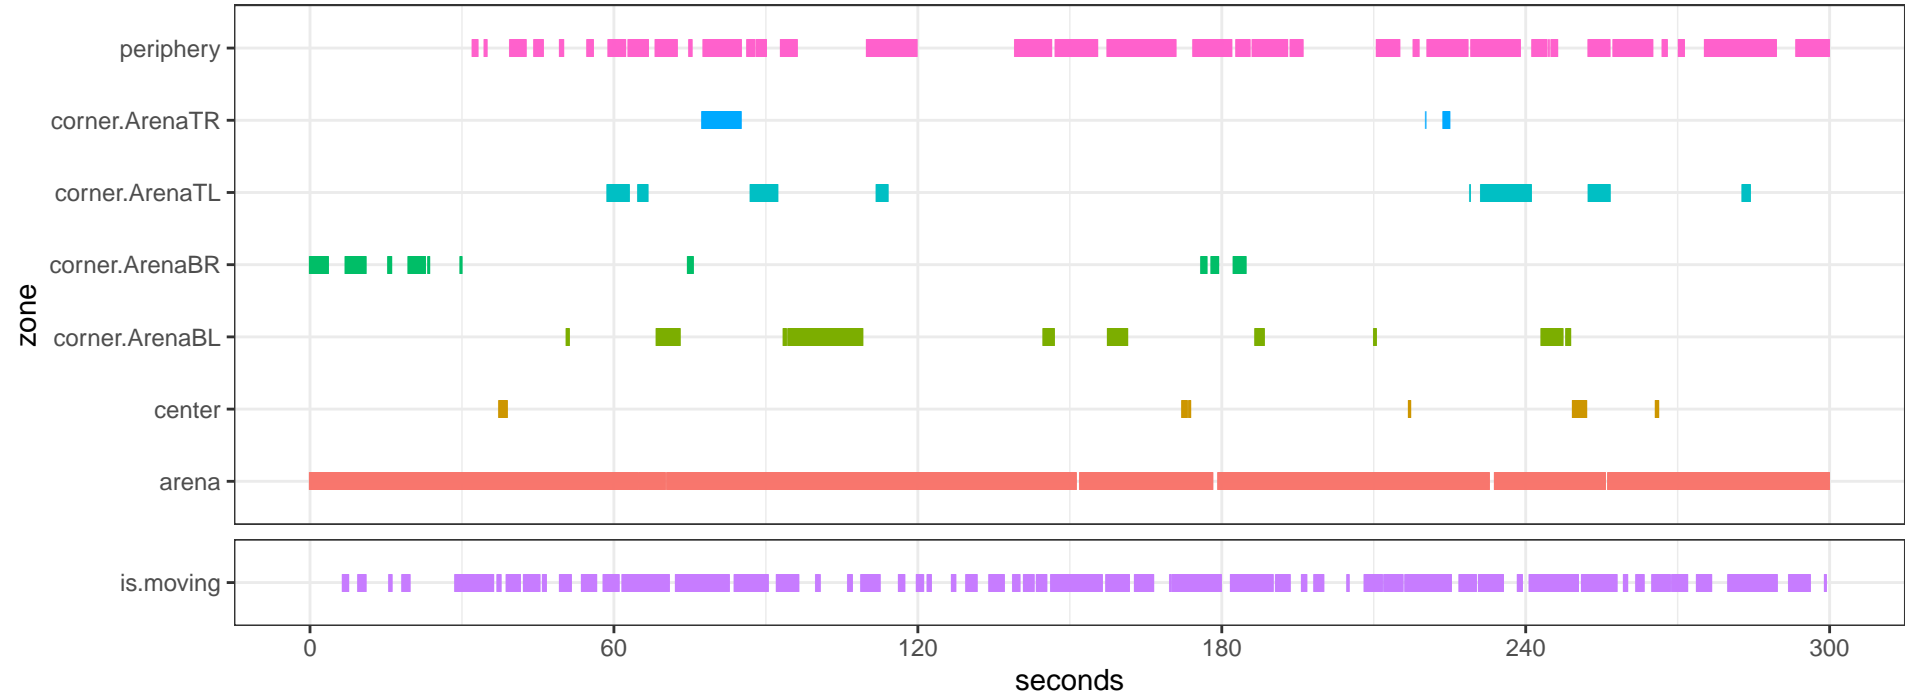

OF\_top\_DREADD\_22-Clo2DLC\_resnet50\_OpenFieldDec23shuffle1\_600000\_filtered.csv

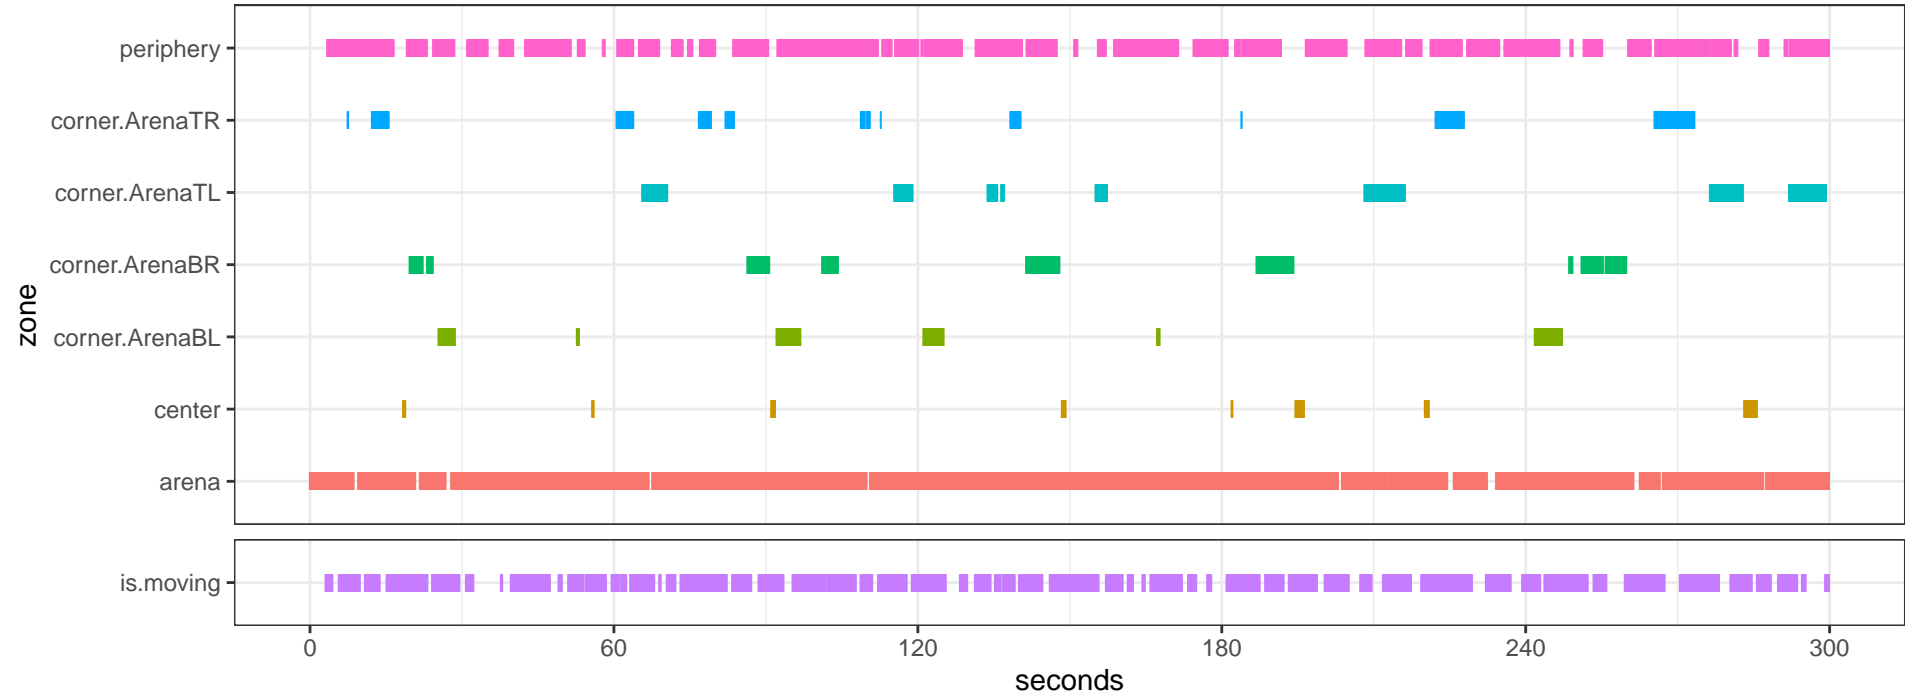



OF\_top\_DREADD\_25-BL1DLC\_resnet50\_OpenFieldDec23shuffle1\_600000\_filtered.csv

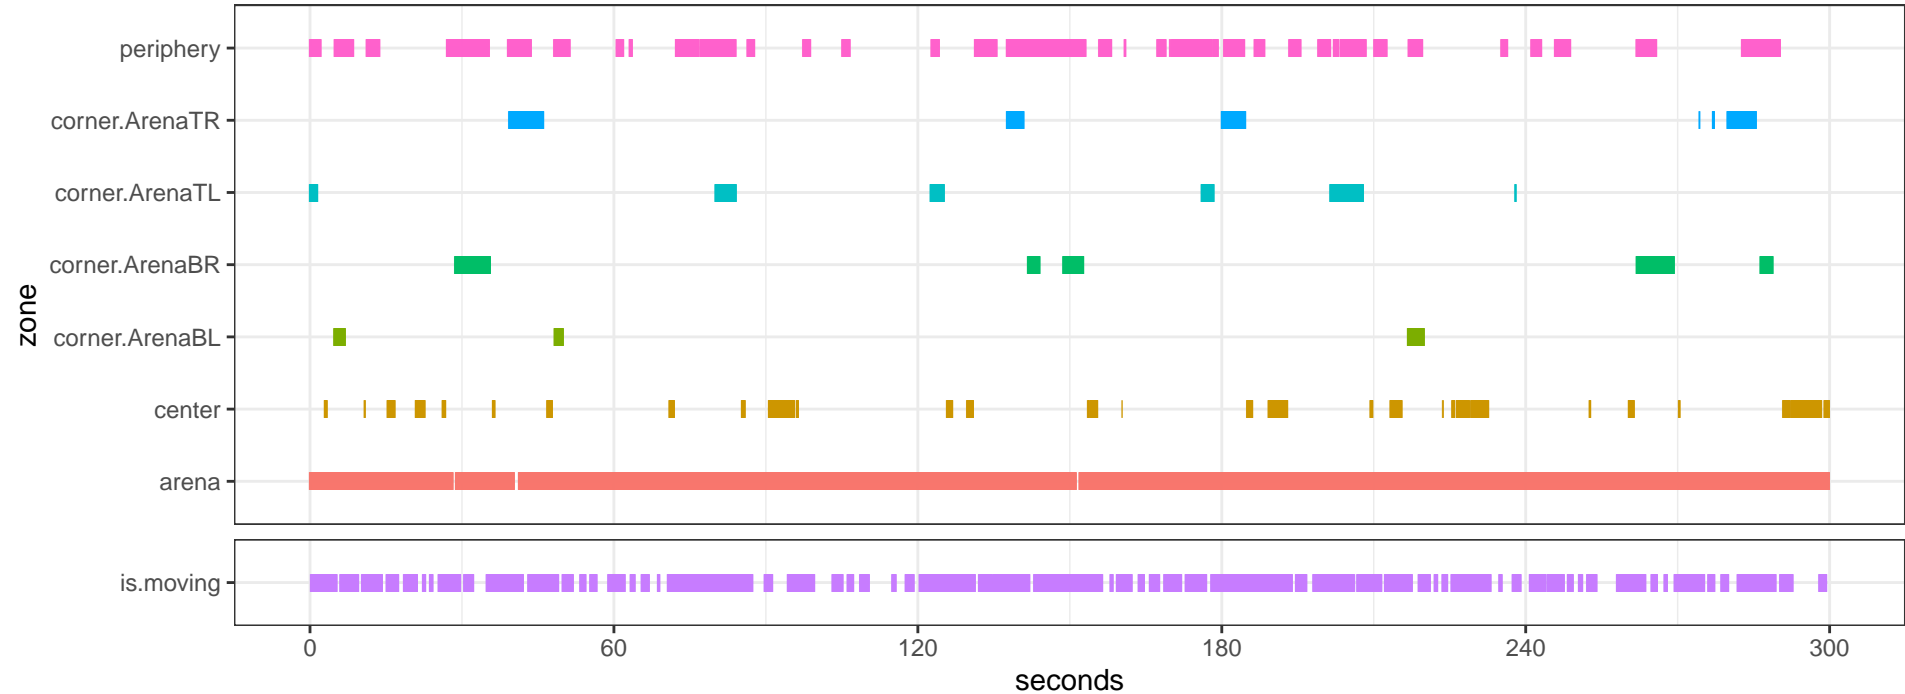

OF\_top\_DREADD\_25-BL2DLC\_resnet50\_OpenFieldDec23shuffle1\_600000\_filtered.csv

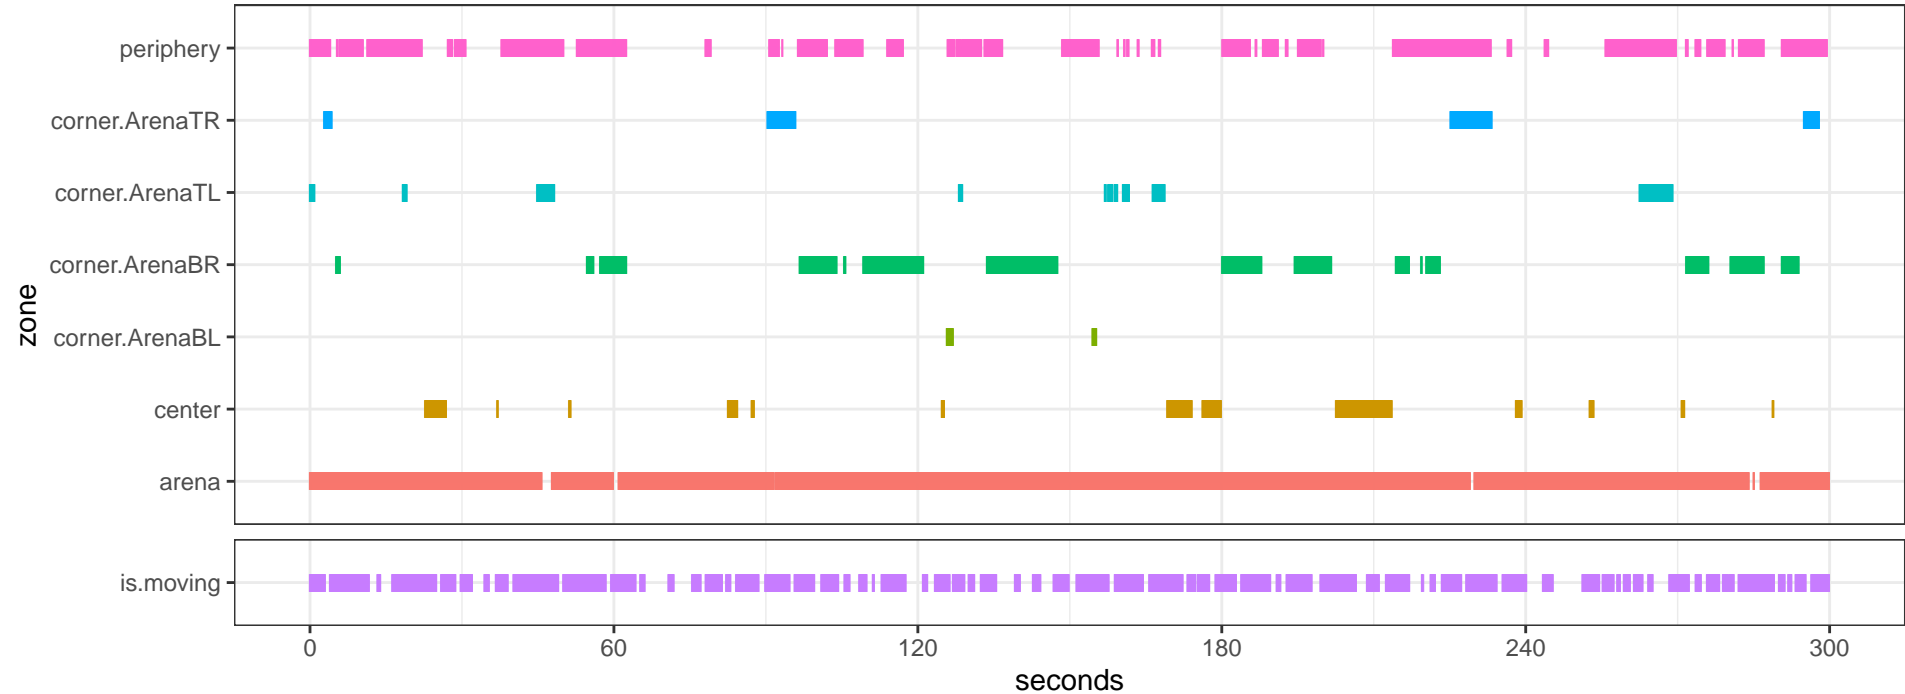

OF\_top\_DREADD\_25-Clo1DLC\_resnet50\_OpenFieldDec23shuffle1\_600000\_filtered.csv

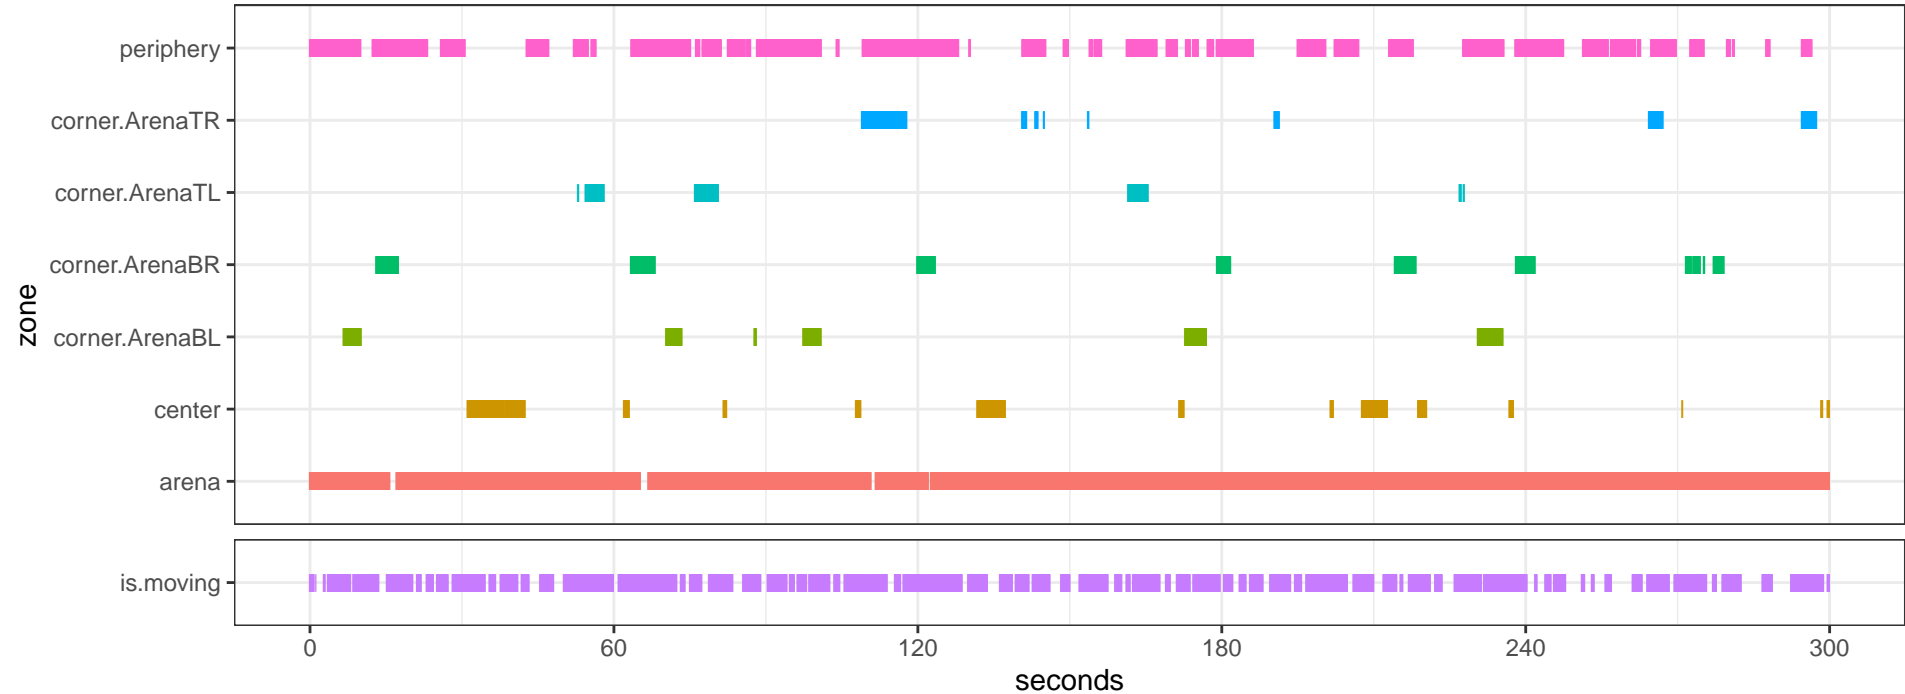

OF\_top\_DREADD\_25-Clo2DLC\_resnet50\_OpenFieldDec23shuffle1\_600000\_filtered.csv

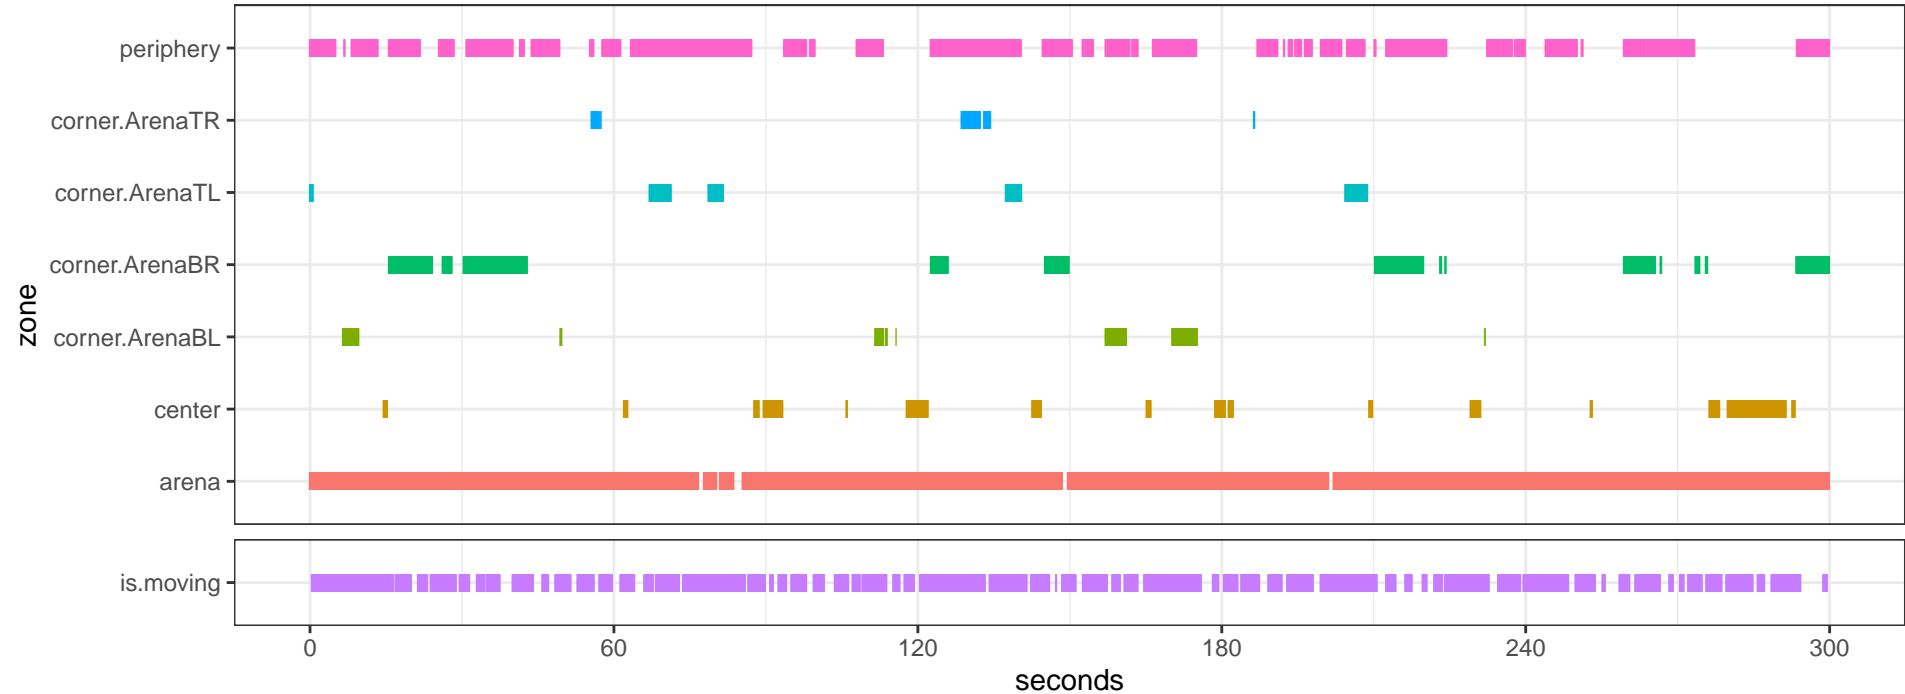

OF\_top\_DREADD\_29-BL1DLC\_resnet50\_OpenFieldDec23shuffle1\_600000\_filtered.csv

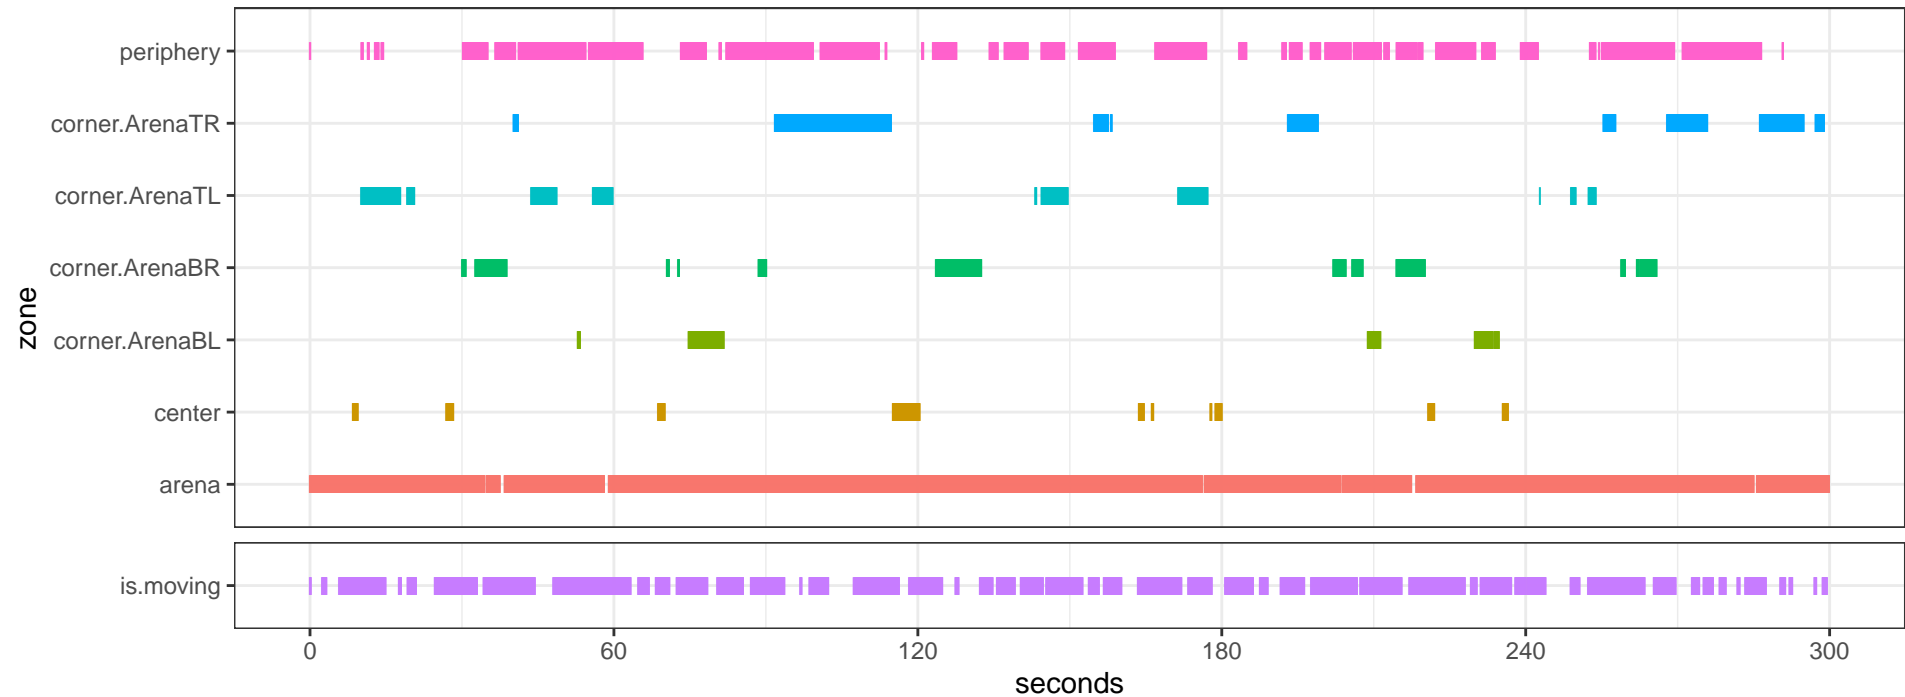

OF\_top\_DREADD\_29-BL2DLC\_resnet50\_OpenFieldDec23shuffle1\_600000\_filtered.csv

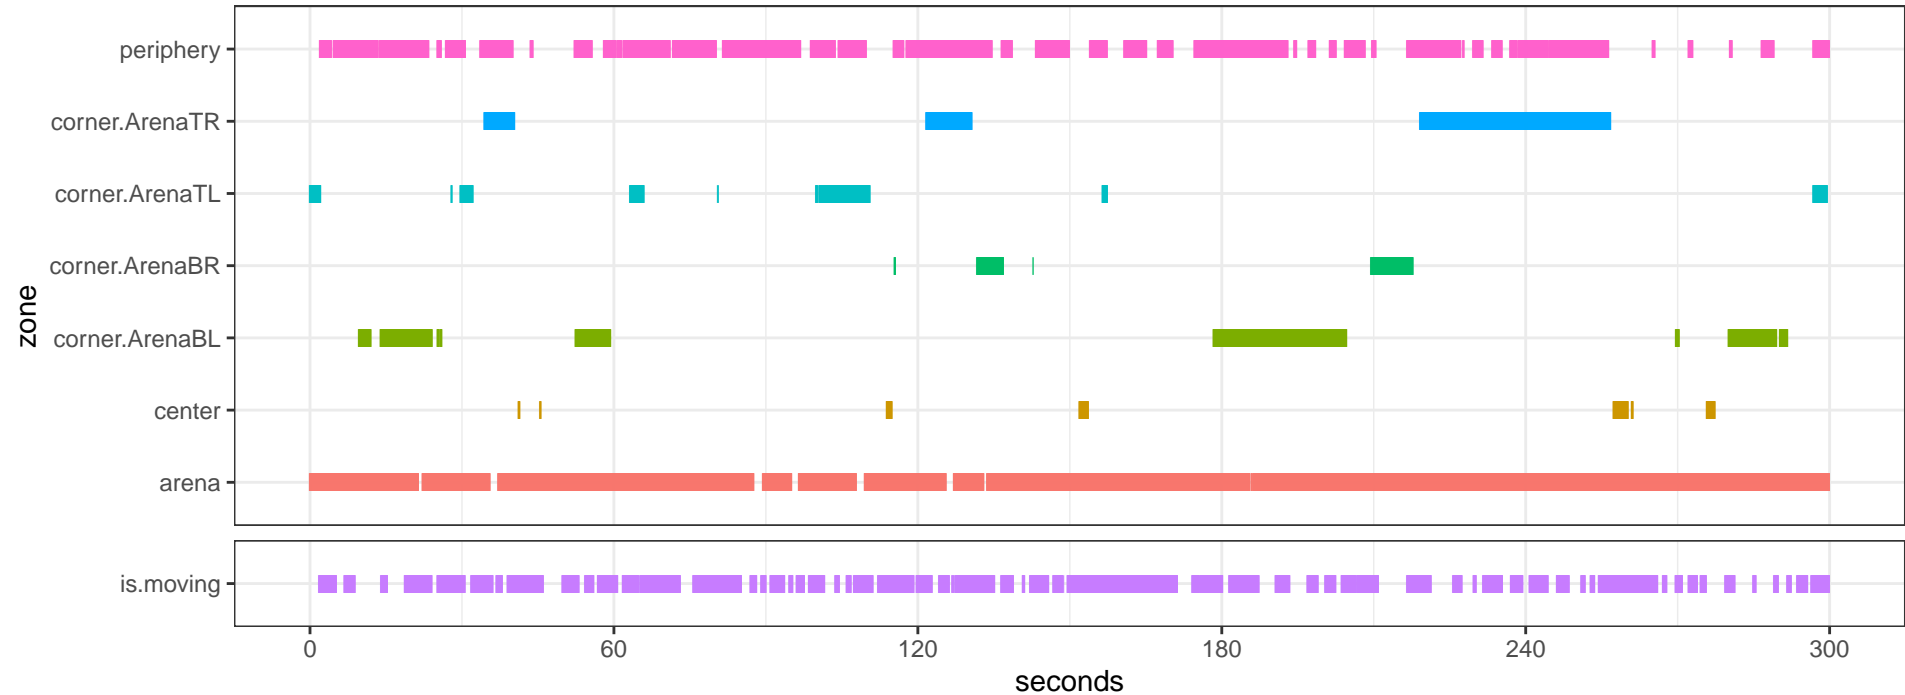

OF\_top\_DREADD\_29-Clo1DLC\_resnet50\_OpenFieldDec23shuffle1\_600000\_filtered.csv

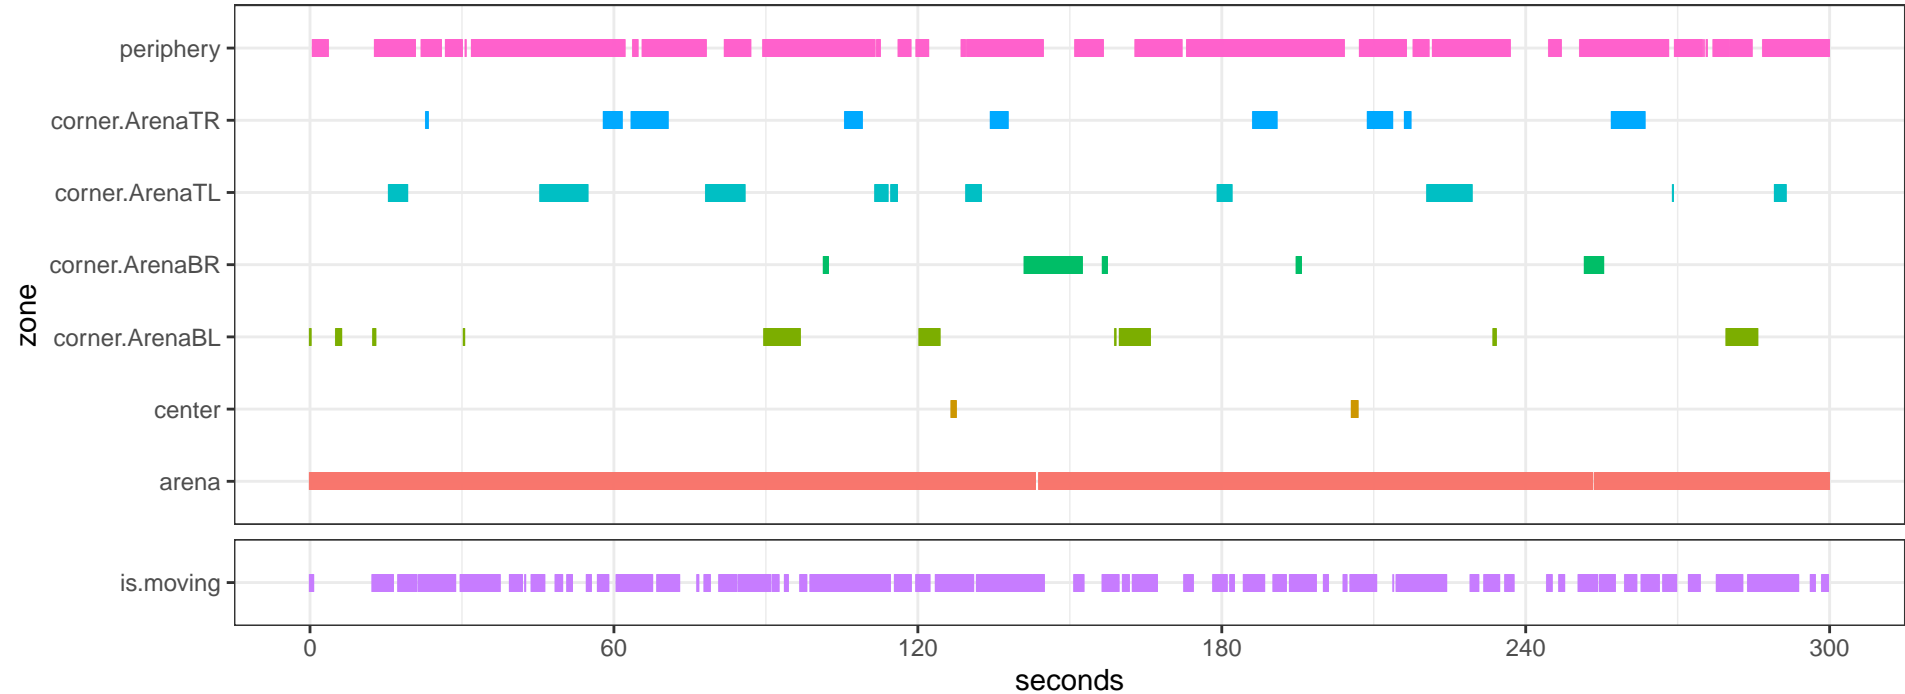

OF\_top\_DREADD\_29-Clo2DLC\_resnet50\_OpenFieldDec23shuffle1\_600000\_filtered.csv

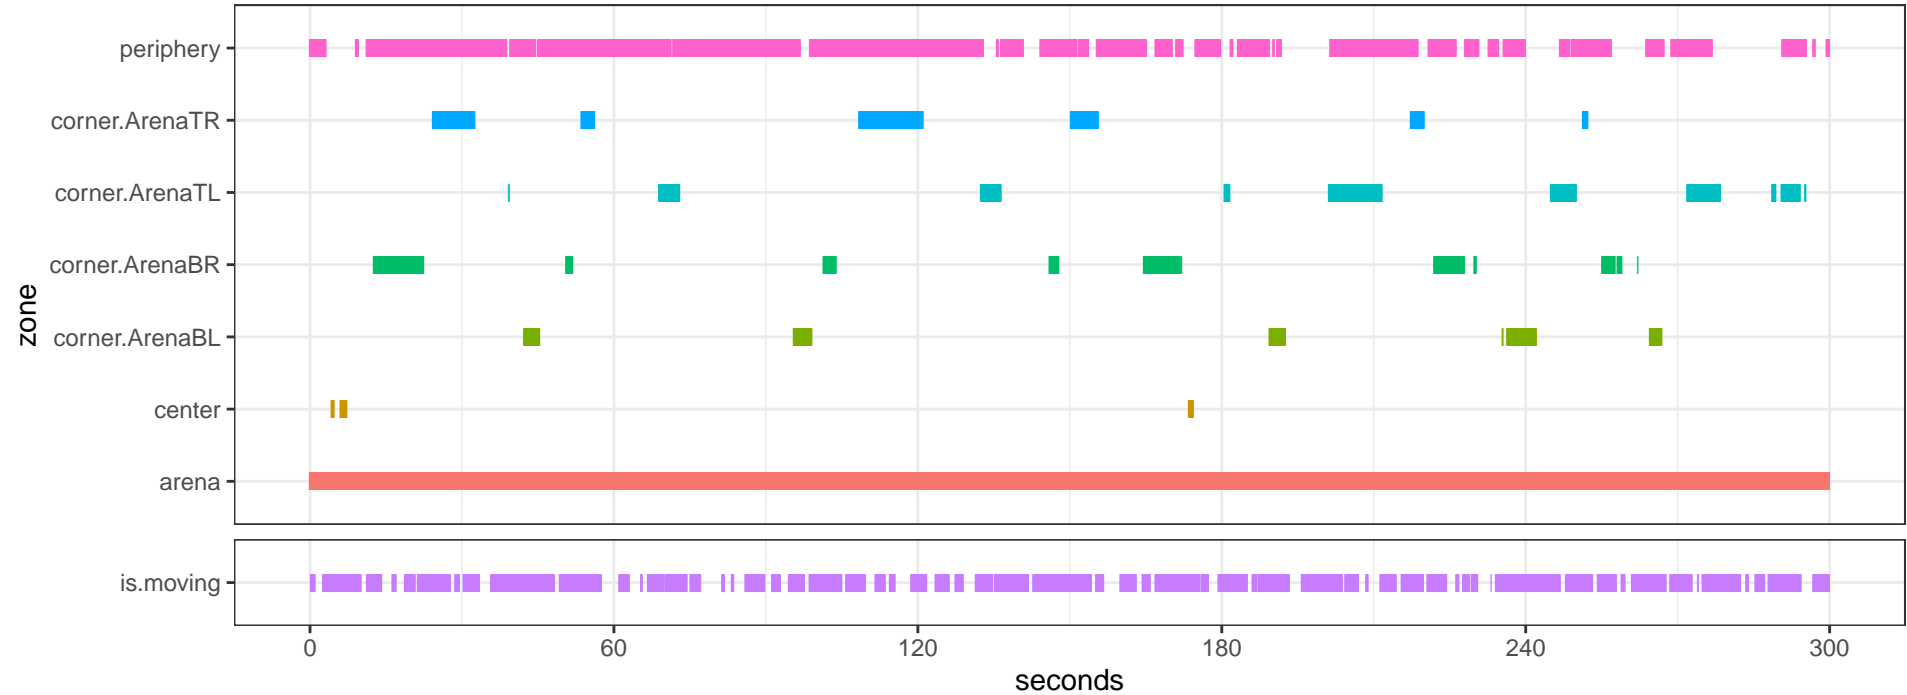



OF\_top\_DREADD\_31-BL1DLC\_resnet50\_OpenFieldDec23shuffle1\_600000\_filtered.csv

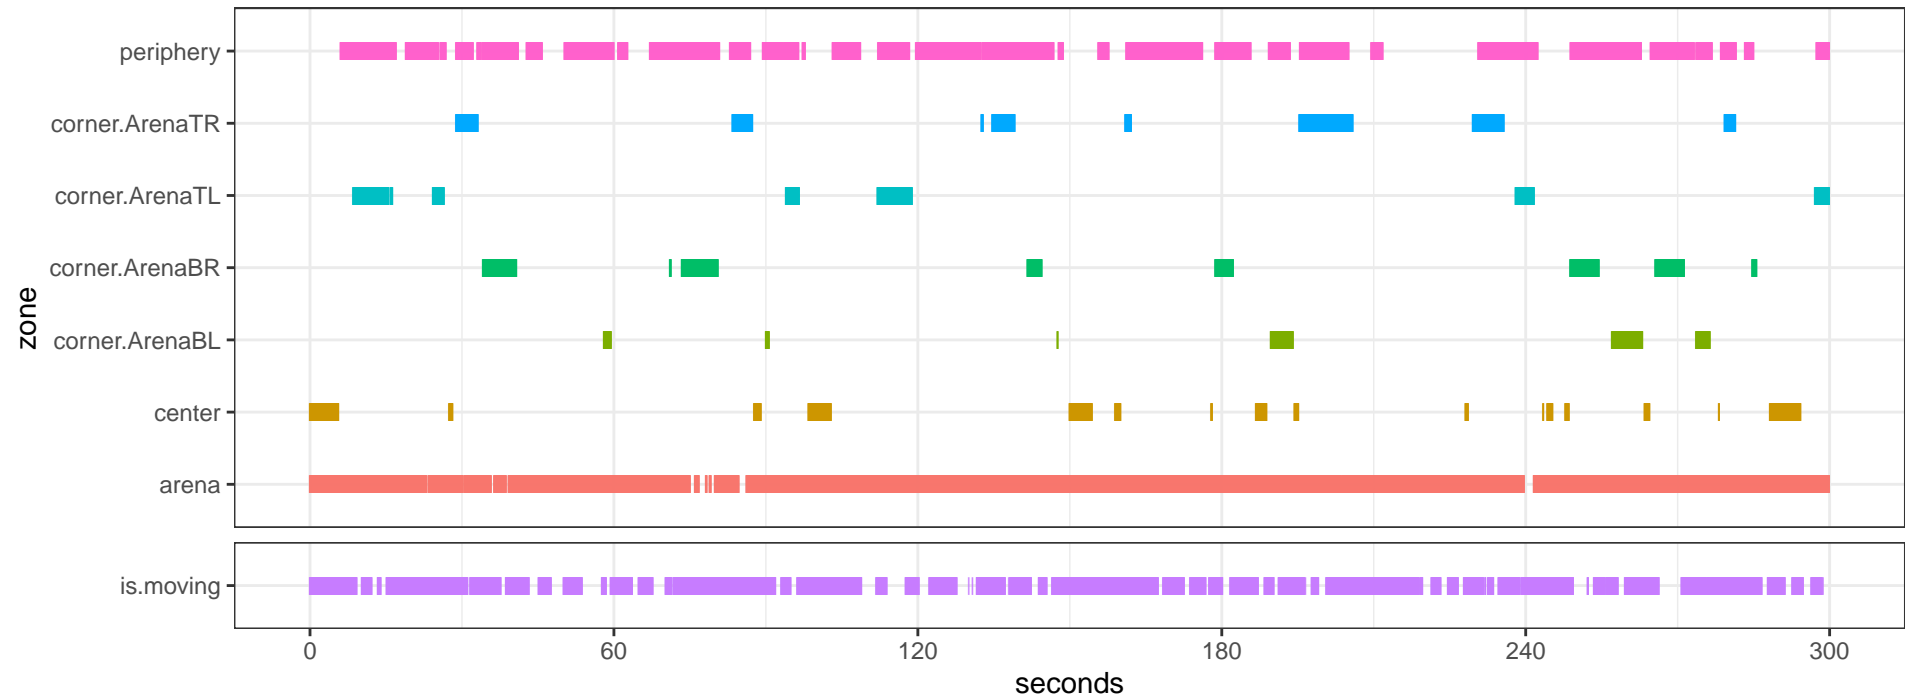

OF\_top\_DREADD\_31-BL2DLC\_resnet50\_OpenFieldDec23shuffle1\_600000\_filtered.csv

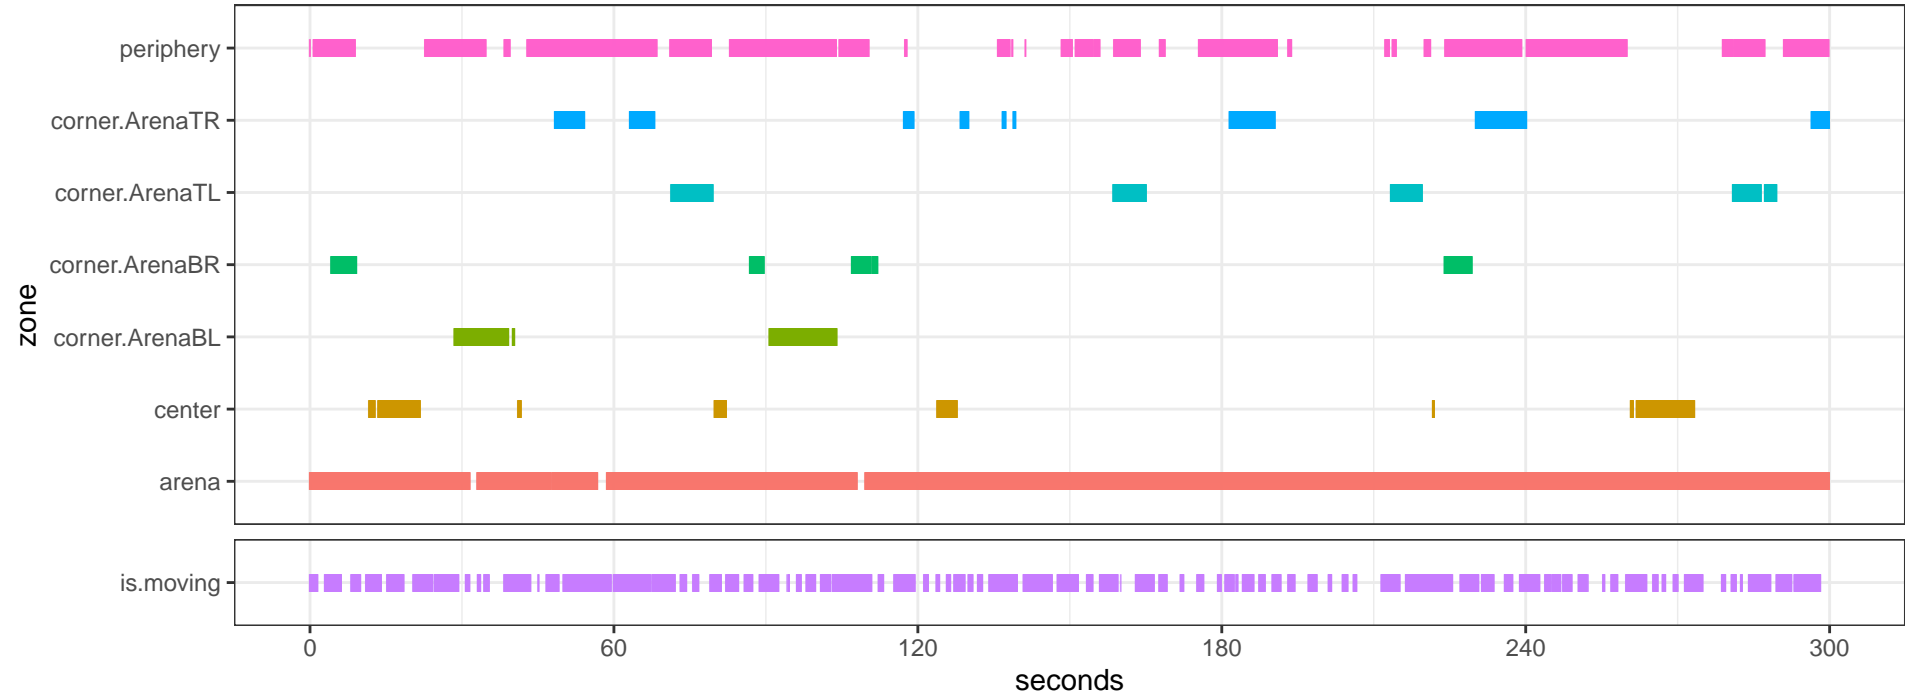

OF\_top\_DREADD\_31-Clo1DLC\_resnet50\_OpenFieldDec23shuffle1\_600000\_filtered.csv

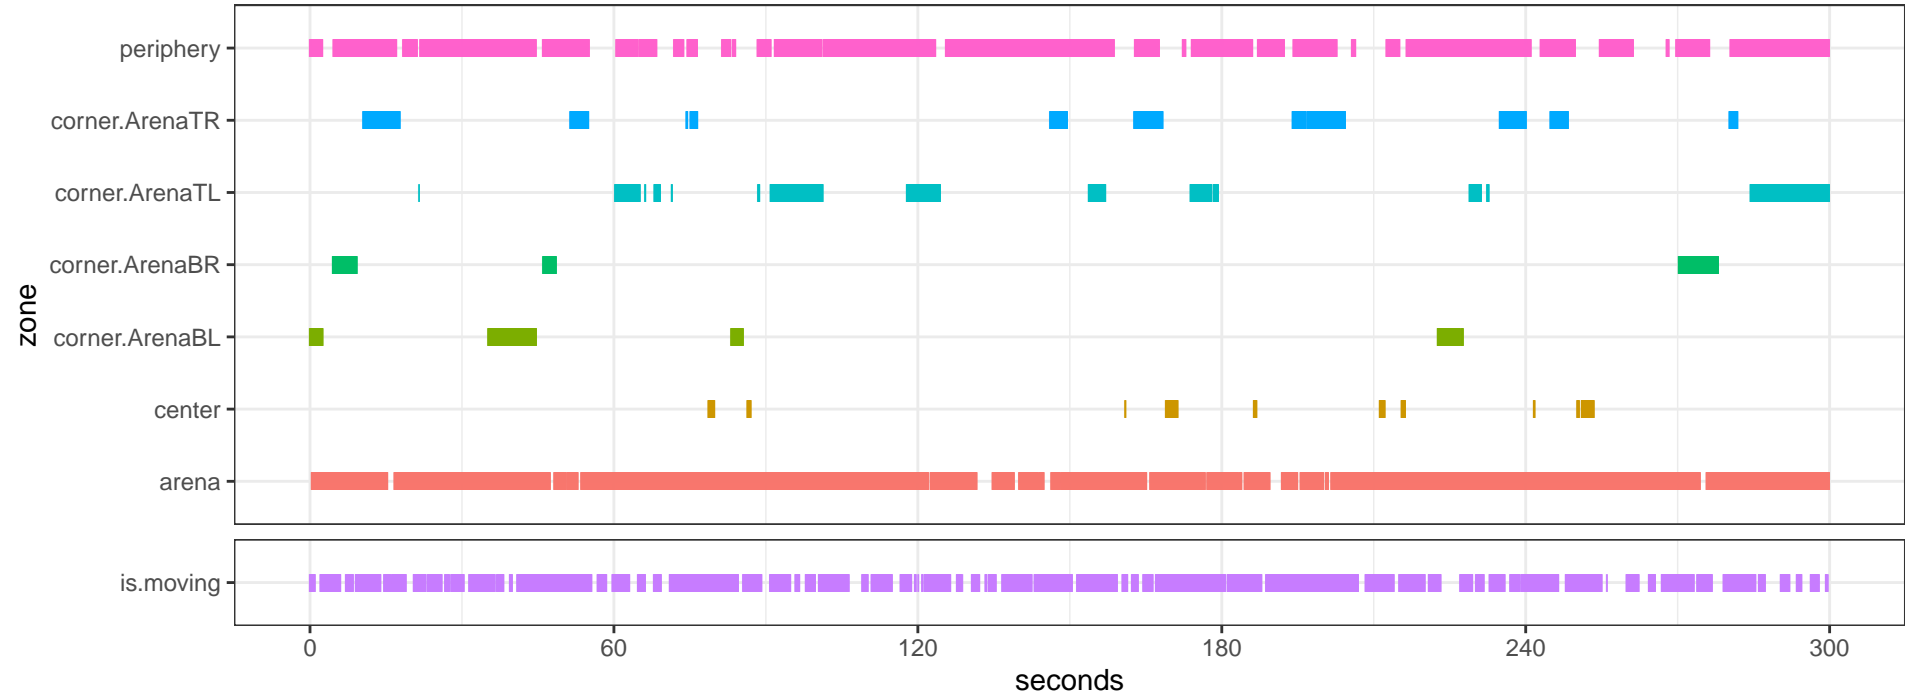

OF\_top\_DREADD\_31-Clo2DLC\_resnet50\_OpenFieldDec23shuffle1\_600000\_filtered.csv

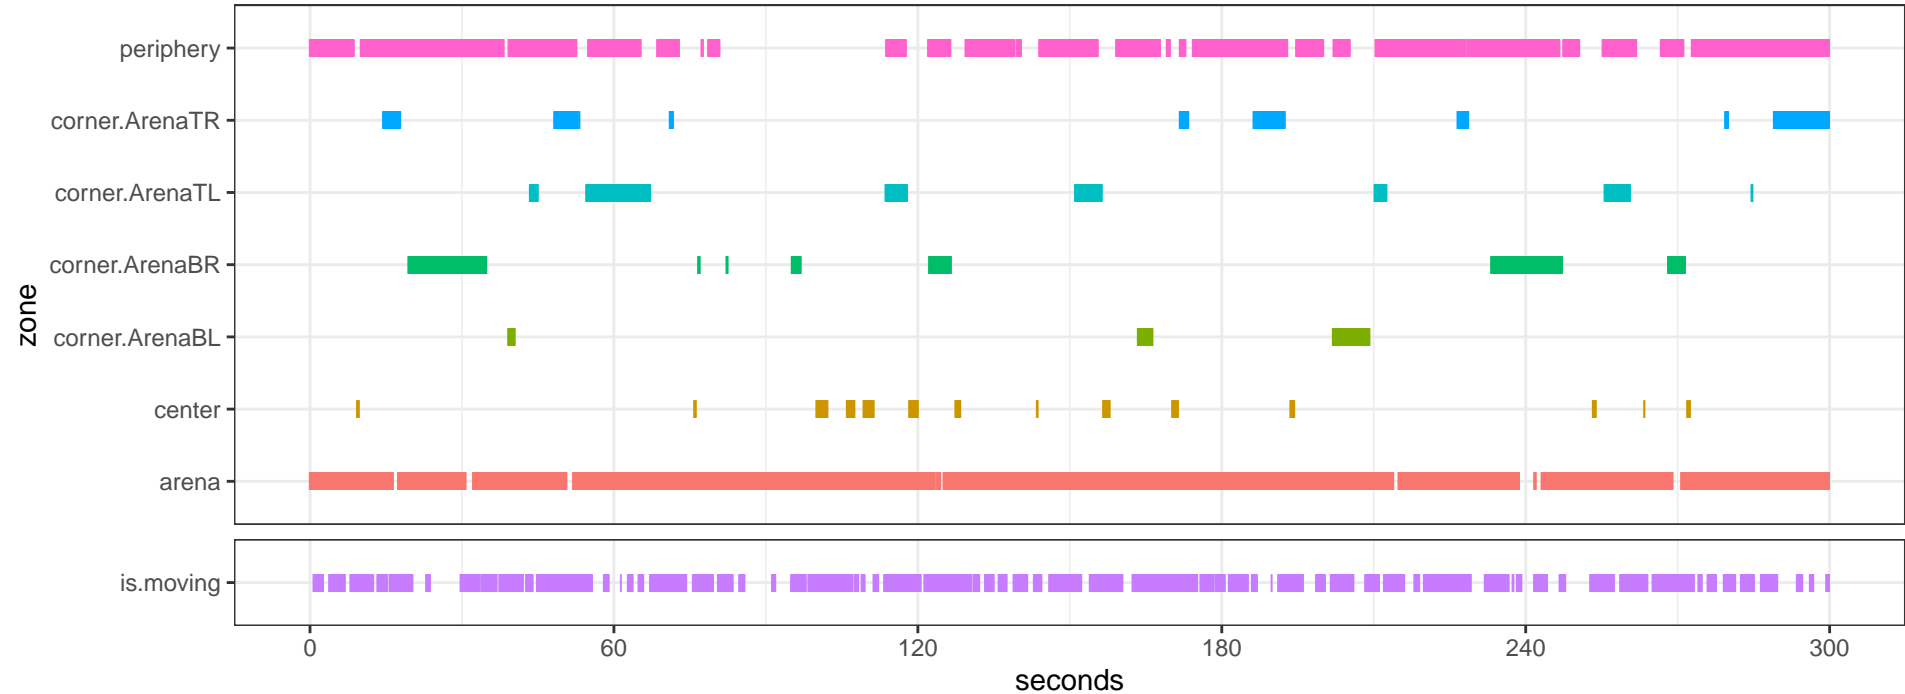

OF\_top\_DREADD\_35-BL1DLC\_resnet50\_OpenFieldDec23shuffle1\_600000\_filtered.csv

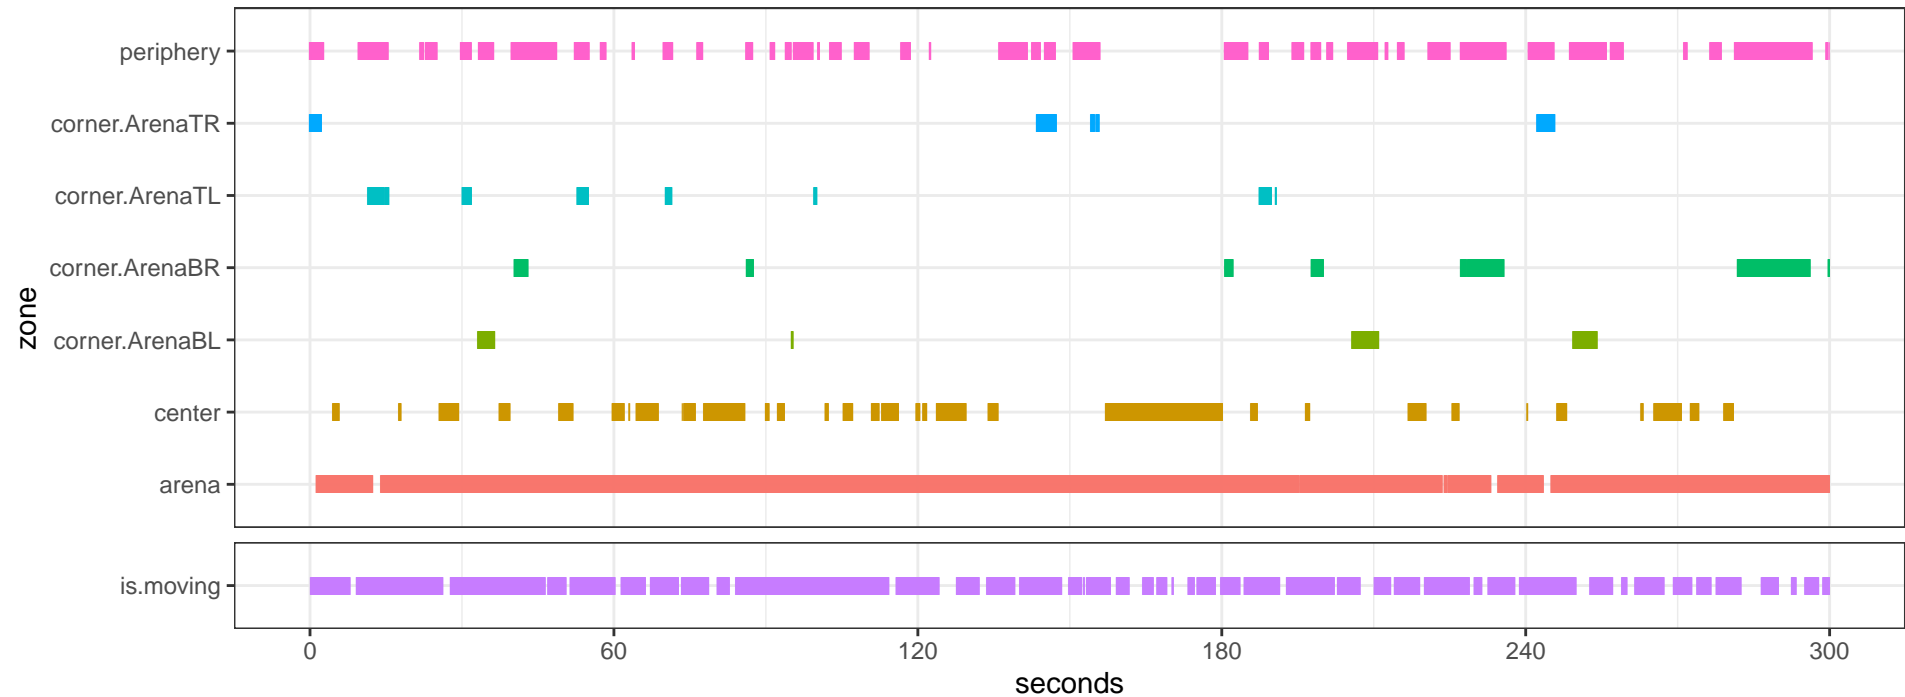

OF\_top\_DREADD\_35-BL2DLC\_resnet50\_OpenFieldDec23shuffle1\_600000\_filtered.csv

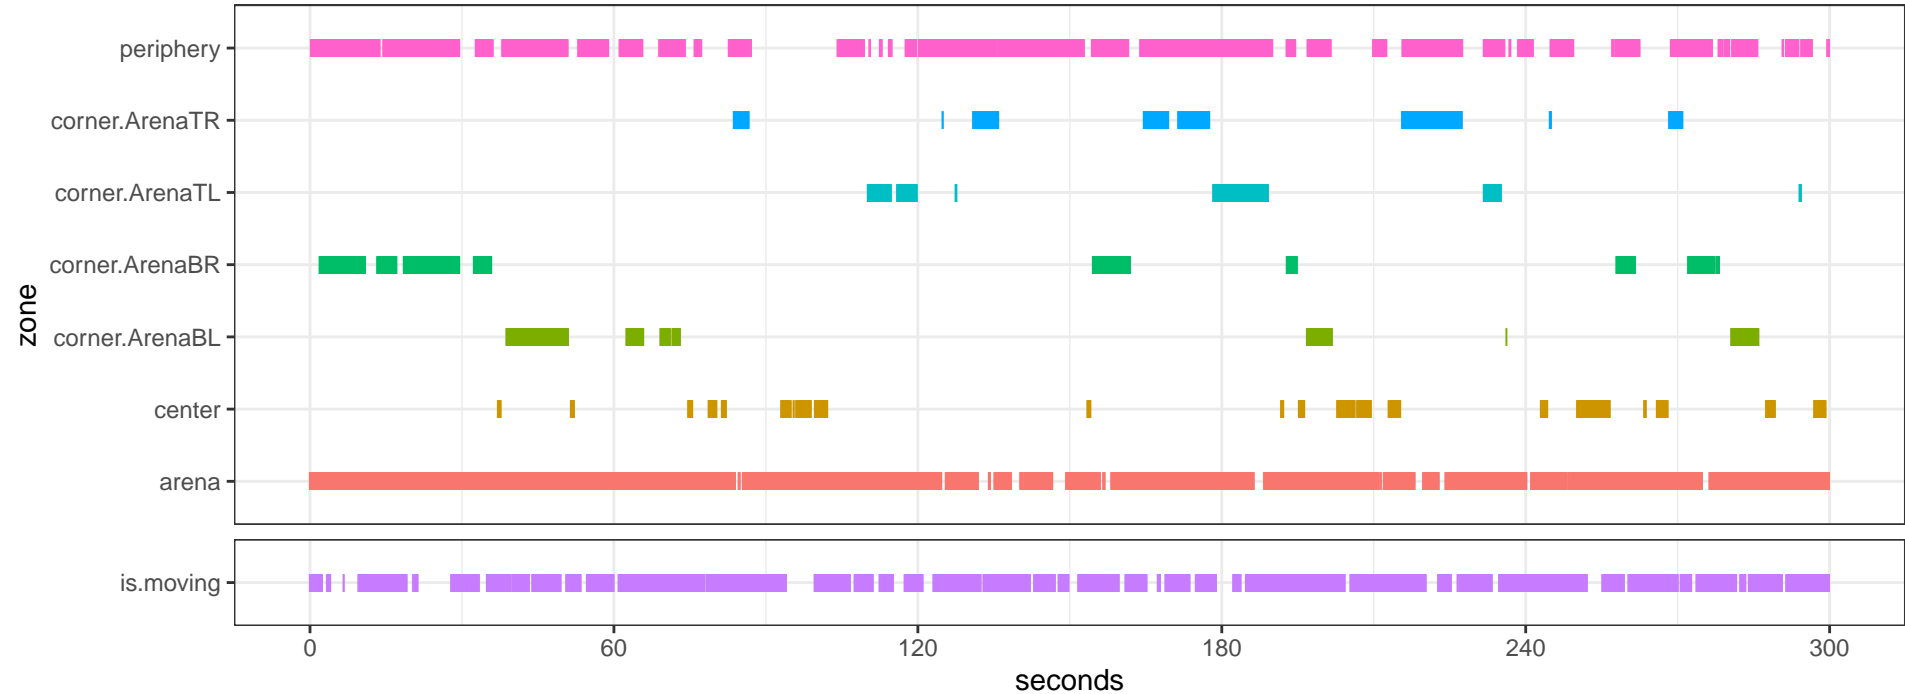

OF\_top\_DREADD\_35-Clo1DLC\_resnet50\_OpenFieldDec23shuffle1\_600000\_filtered.csv

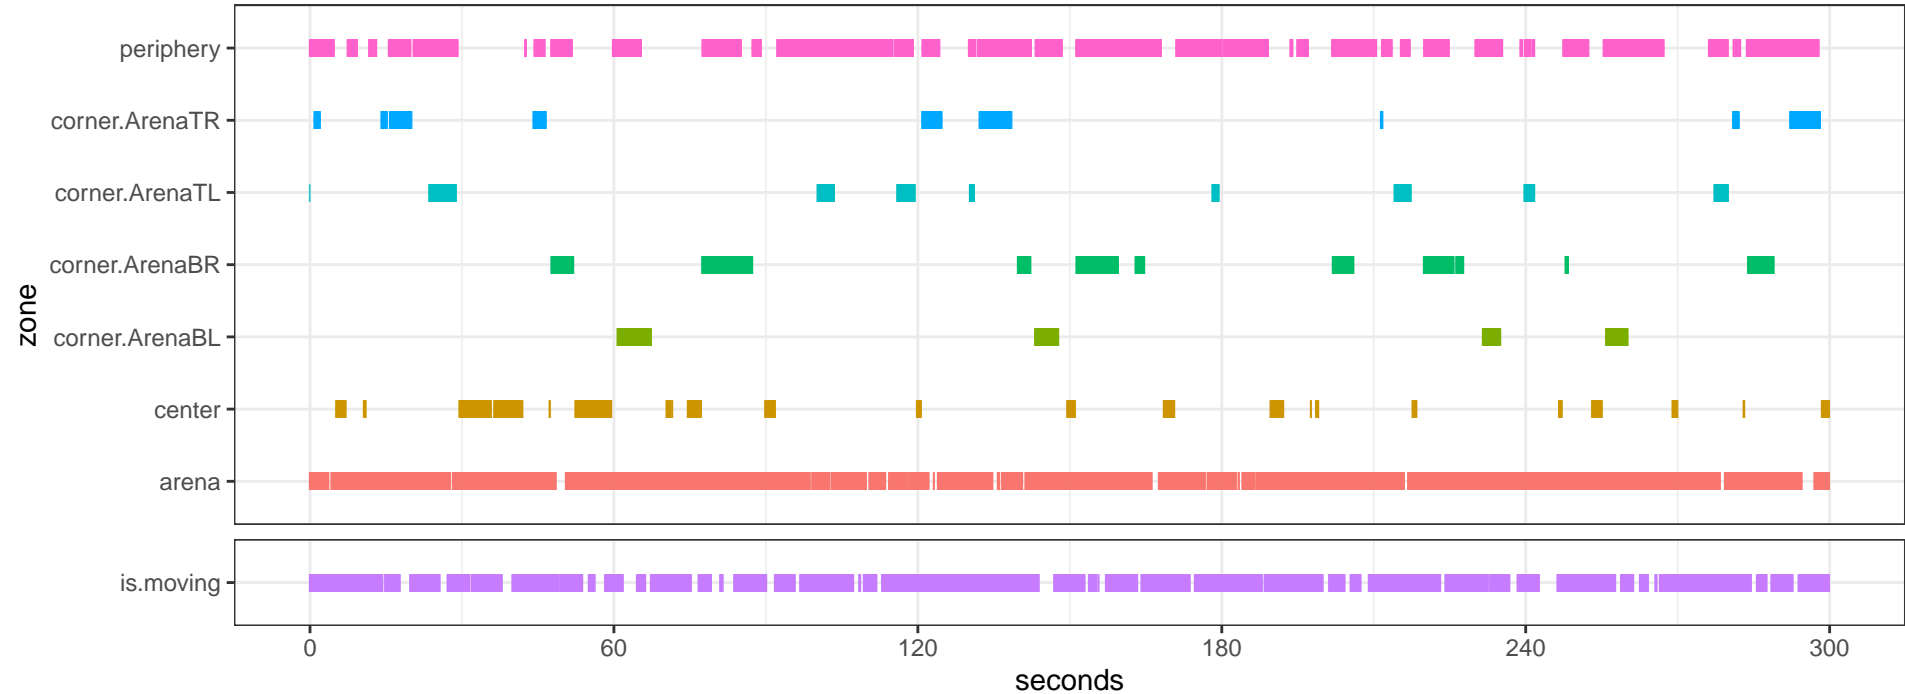

OF\_top\_DREADD\_35-Clo2DLC\_resnet50\_OpenFieldDec23shuffle1\_600000\_filtered.csv

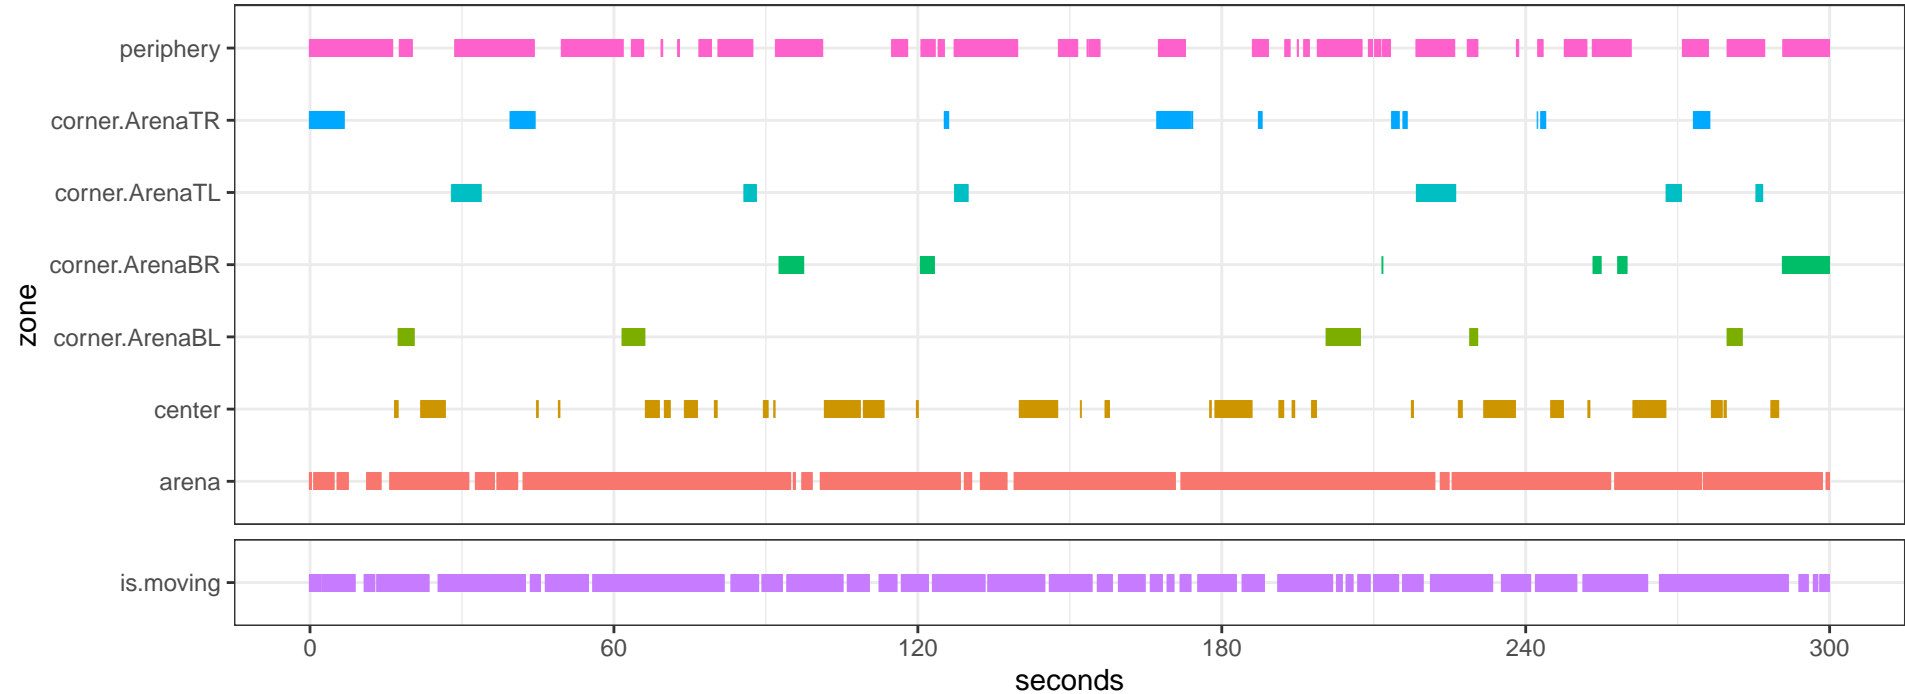



OF\_top\_DREADD\_36-BL1DLC\_resnet50\_OpenFieldDec23shuffle1\_600000\_filtered.csv

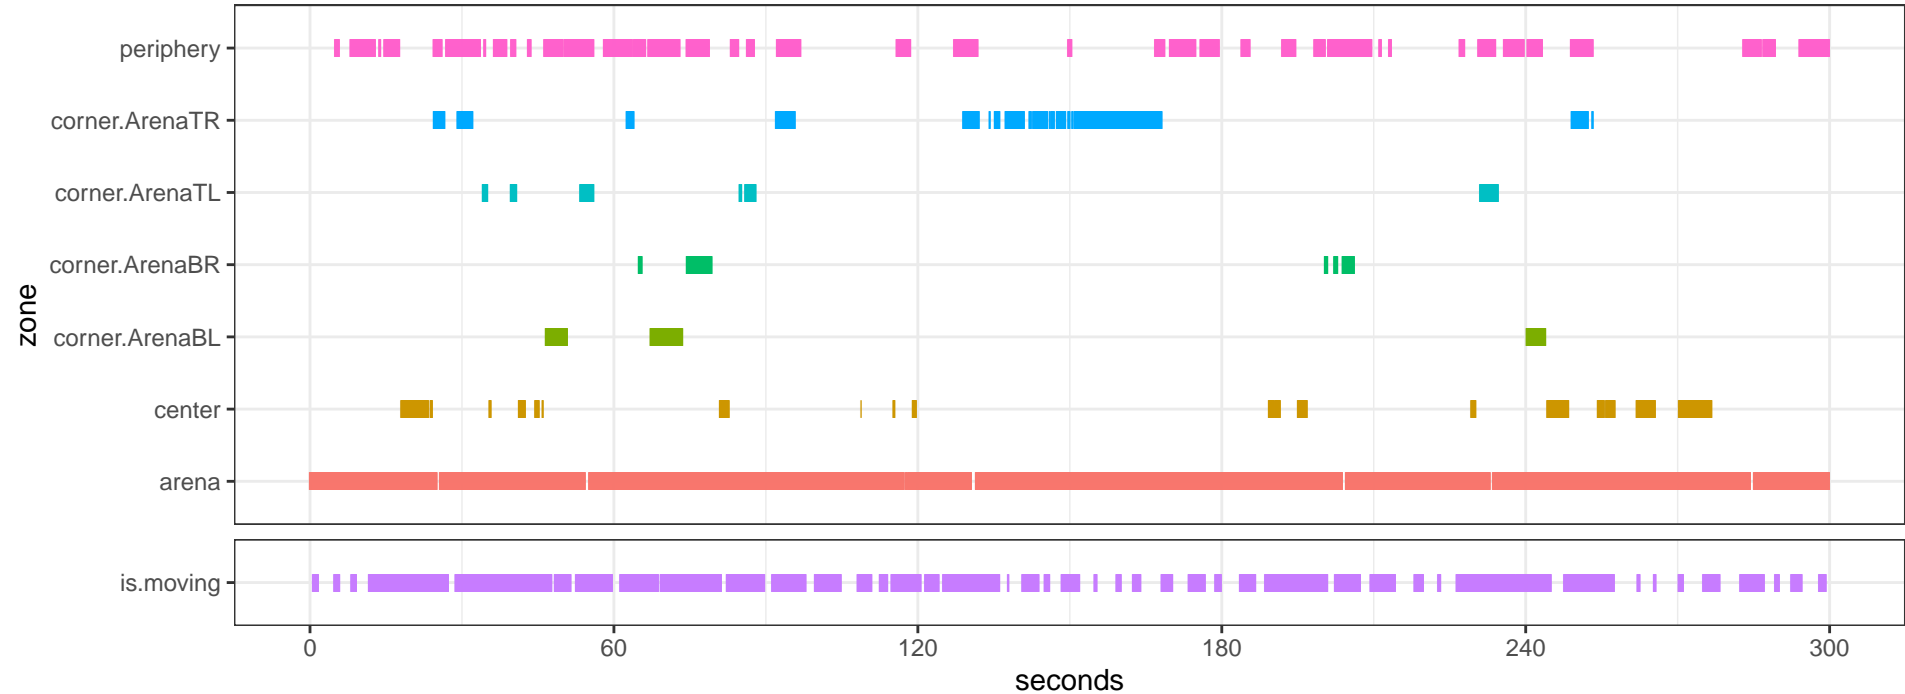

OF\_top\_DREADD\_36-BL2DLC\_resnet50\_OpenFieldDec23shuffle1\_600000\_filtered.csv

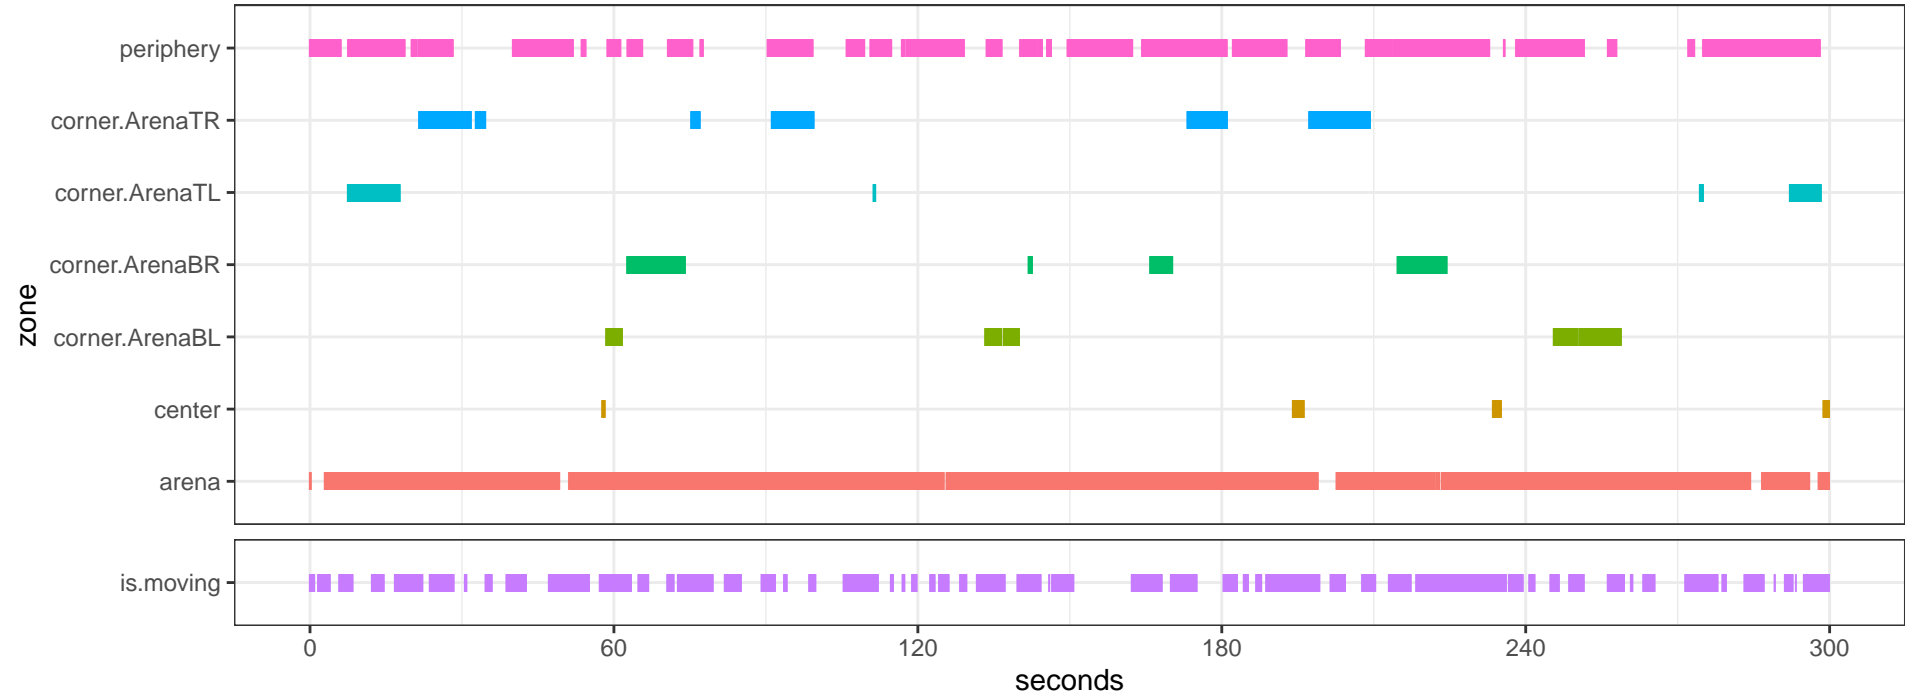

OF\_top\_DREADD\_36-Clo1DLC\_resnet50\_OpenFieldDec23shuffle1\_600000\_filtered.csv

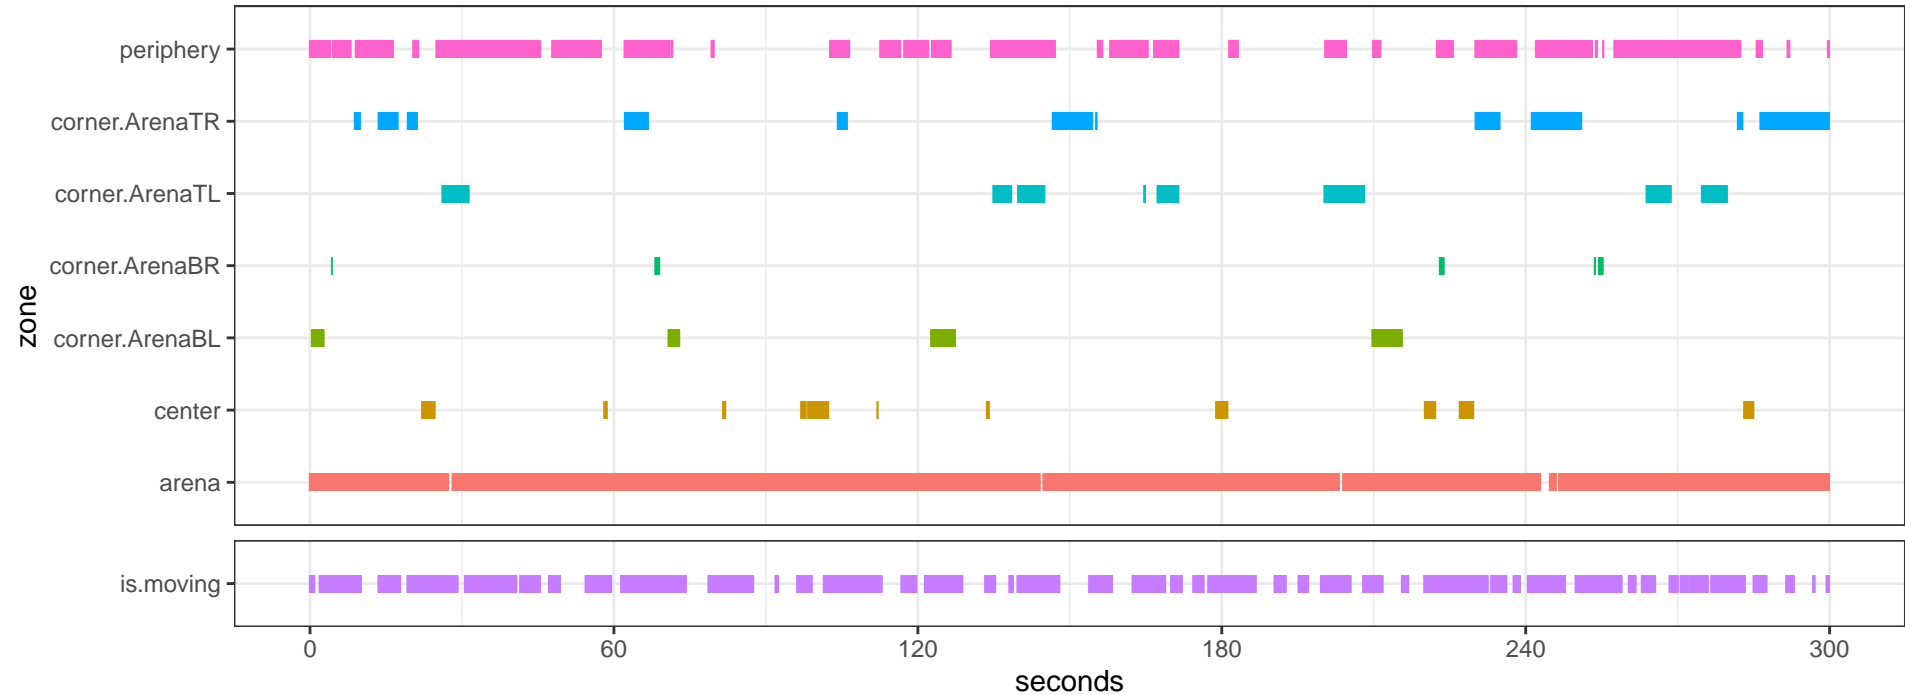

OF\_top\_DREADD\_36-Clo2DLC\_resnet50\_OpenFieldDec23shuffle1\_600000\_filtered.csv

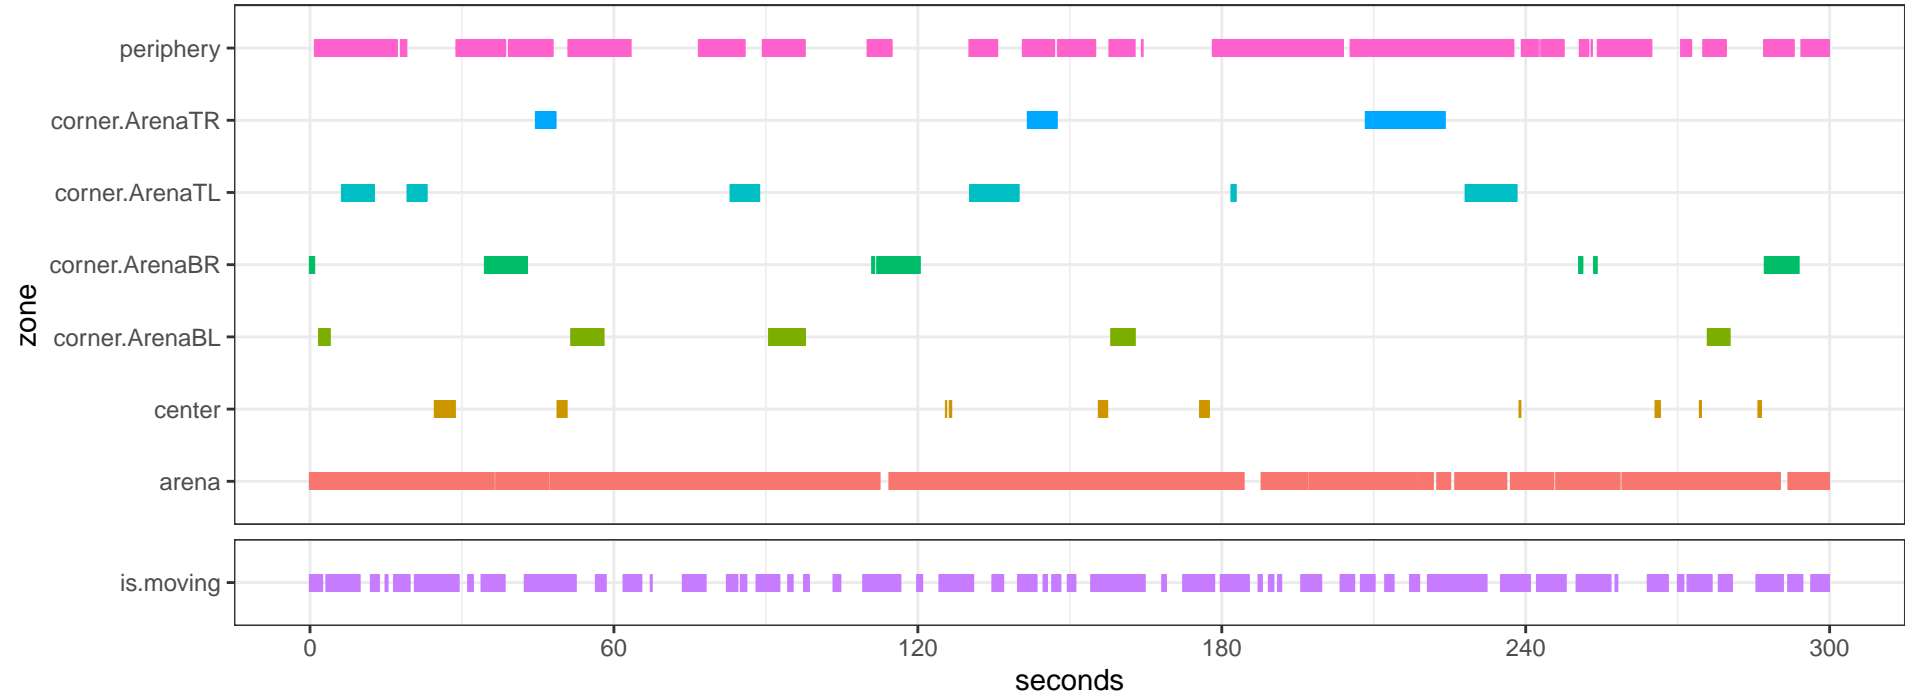

OF\_top\_DREADD\_40-BL1DLC\_resnet50\_OpenFieldDec23shuffle1\_600000\_filtered.csv

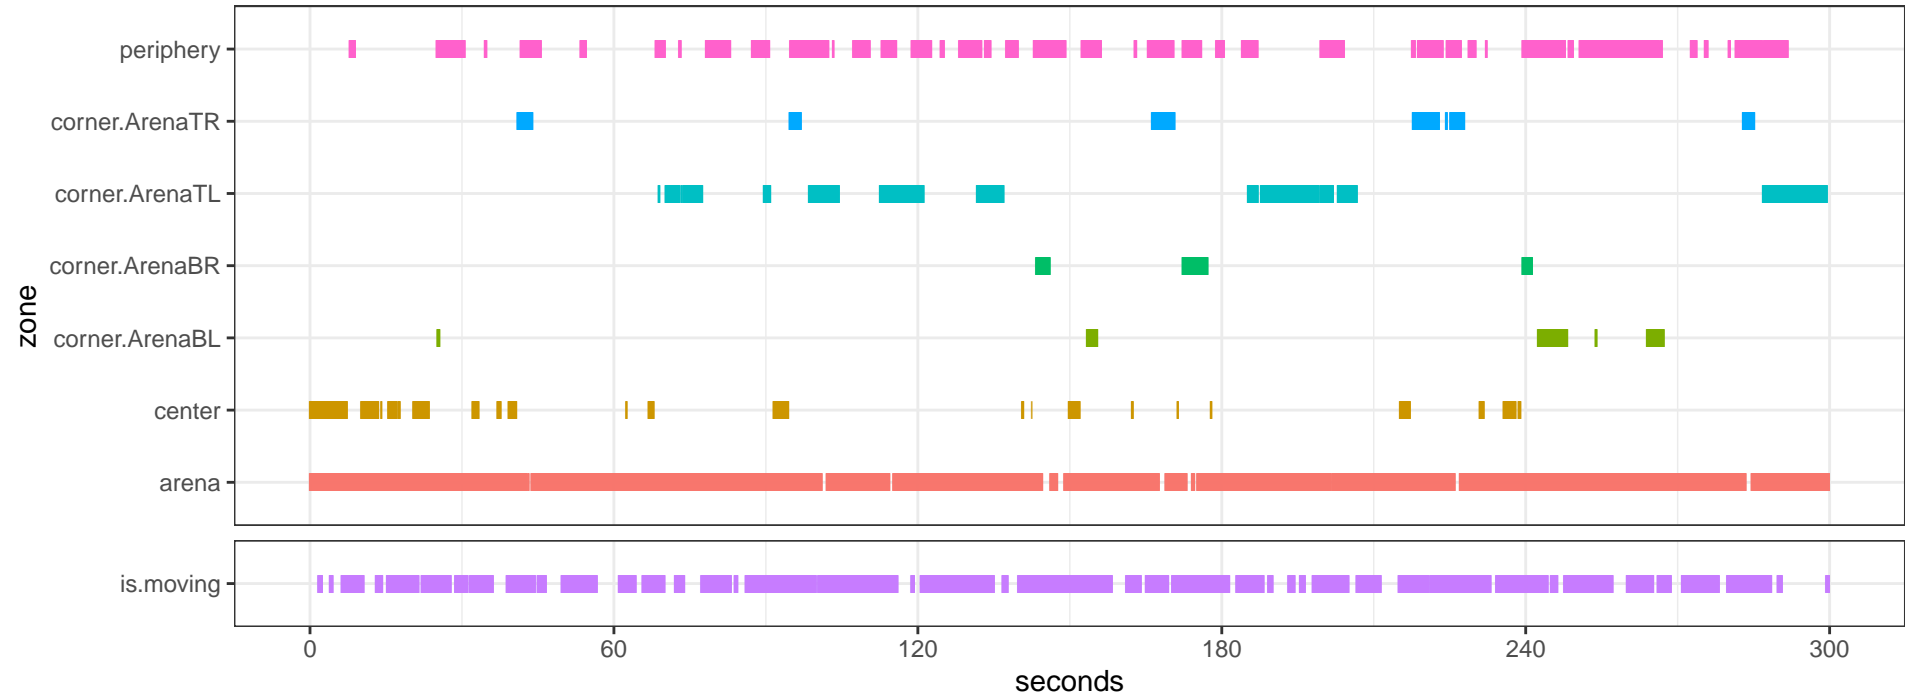

OF\_top\_DREADD\_40-BL2DLC\_resnet50\_OpenFieldDec23shuffle1\_600000\_filtered.csv

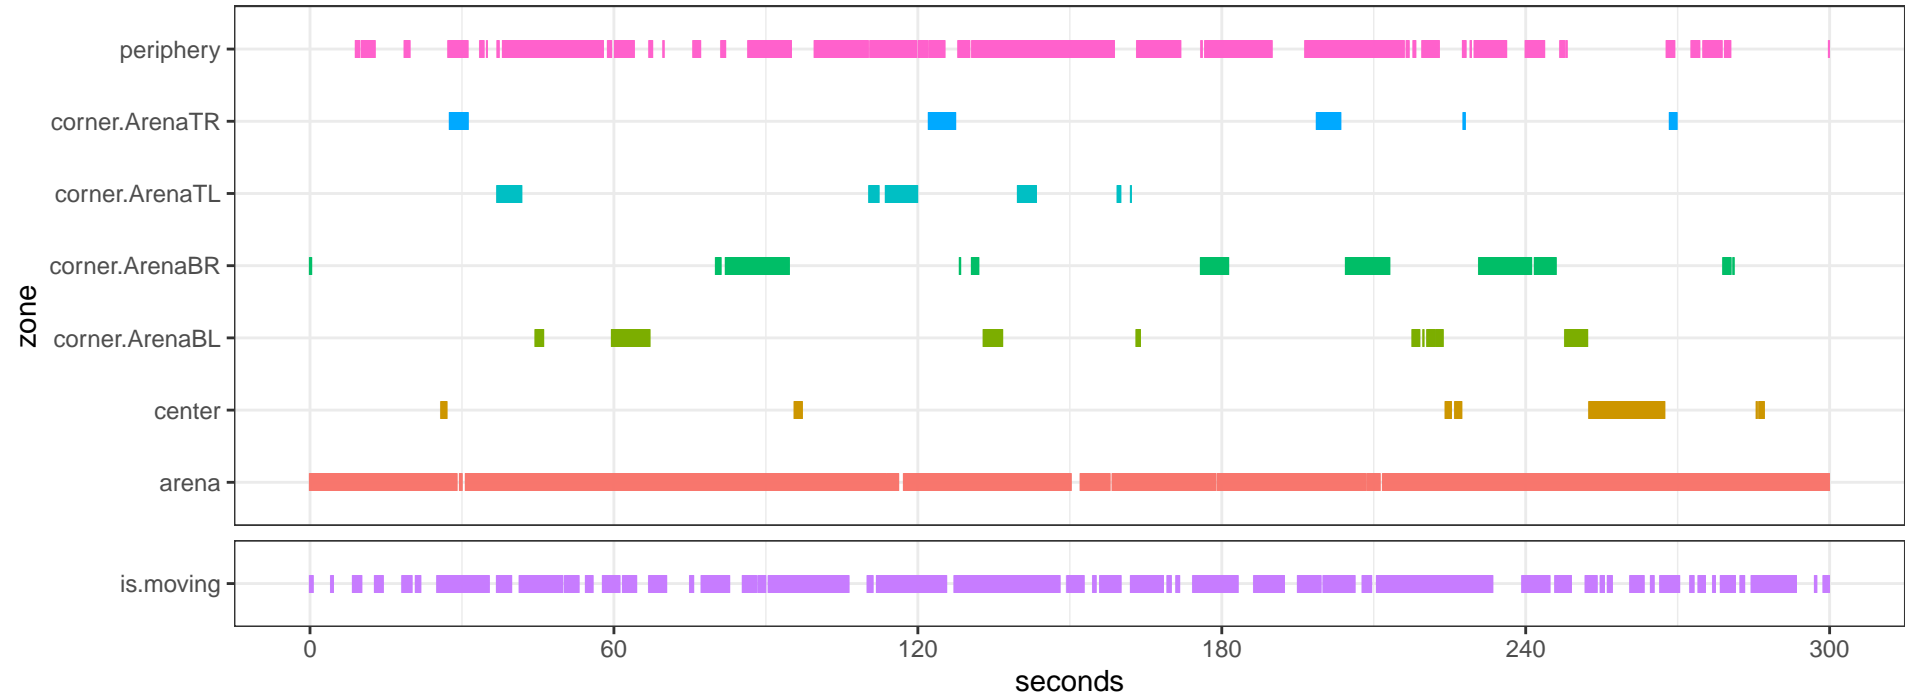

OF\_top\_DREADD\_40-Clo1DLC\_resnet50\_OpenFieldDec23shuffle1\_600000\_filtered.csv

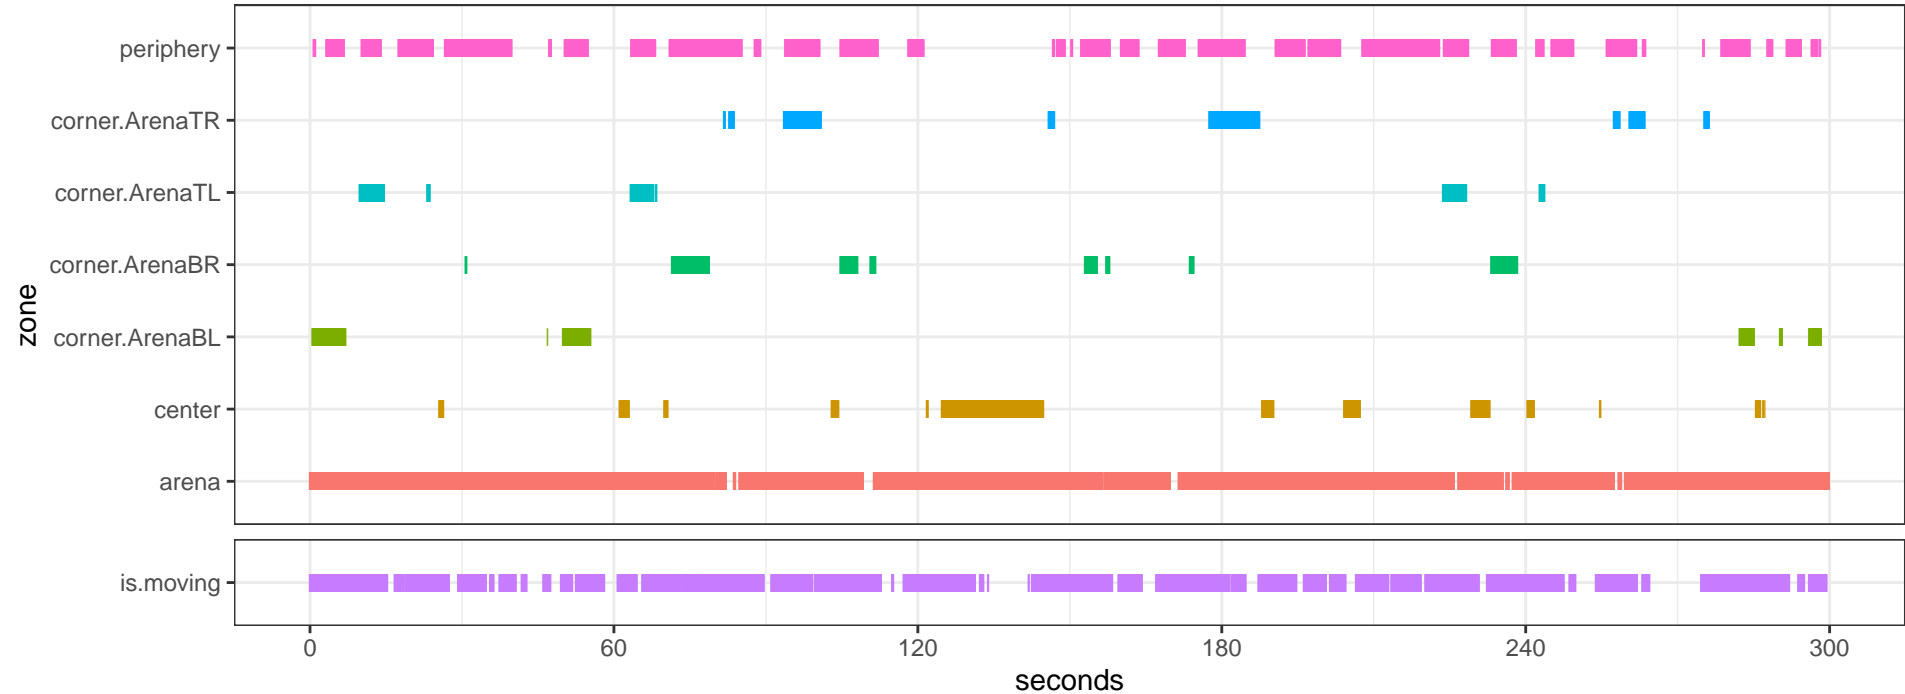

OF\_top\_DREADD\_40-Clo2DLC\_resnet50\_OpenFieldDec23shuffle1\_600000\_filtered.csv

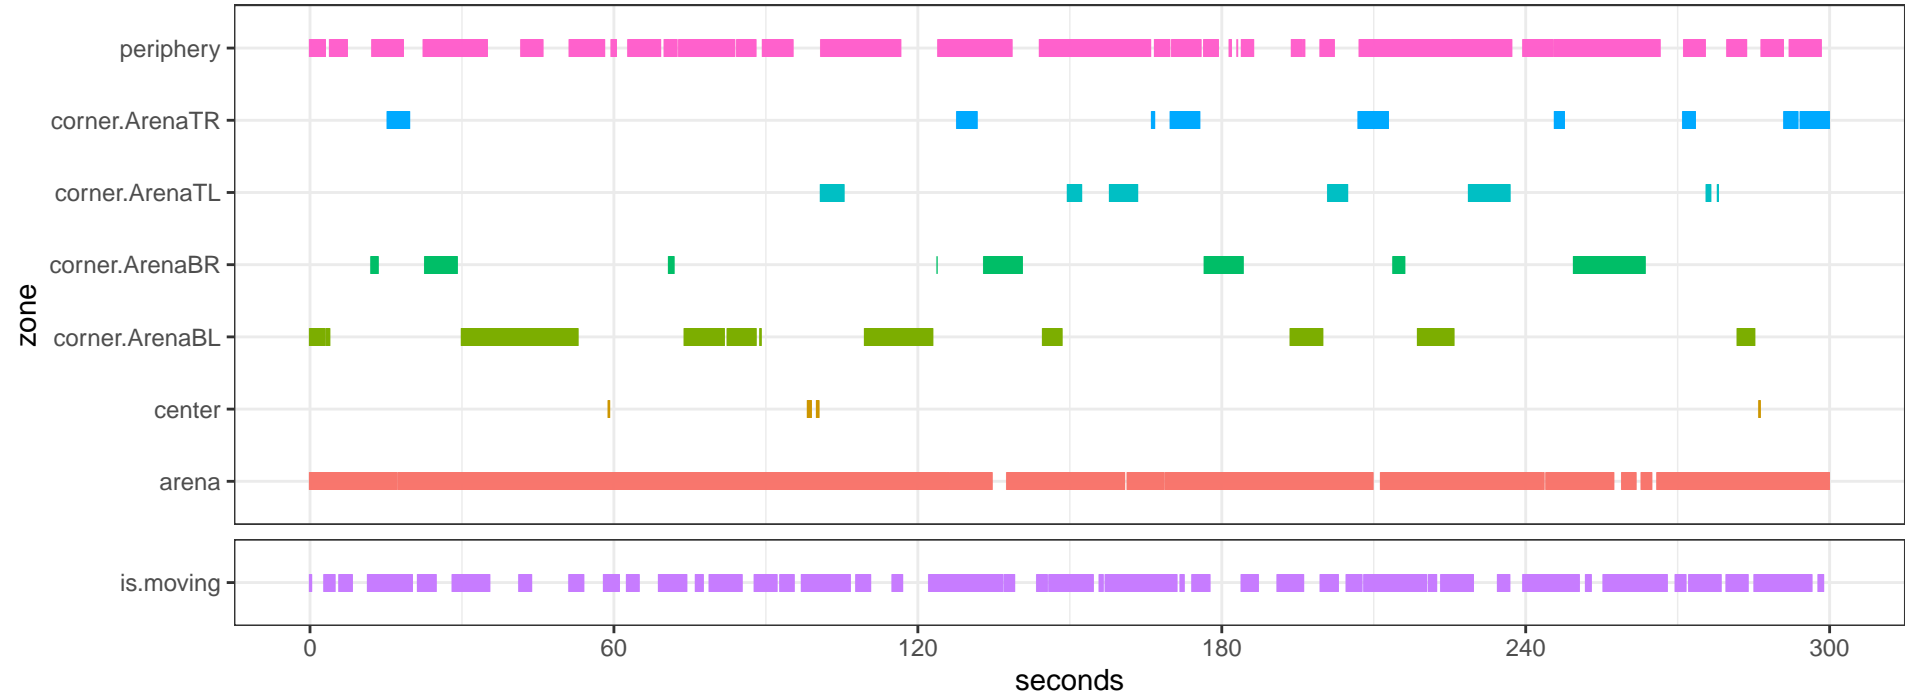



OF\_top\_DREADD\_41-BL1DLC\_resnet50\_OpenFieldDec23shuffle1\_600000\_filtered.csv

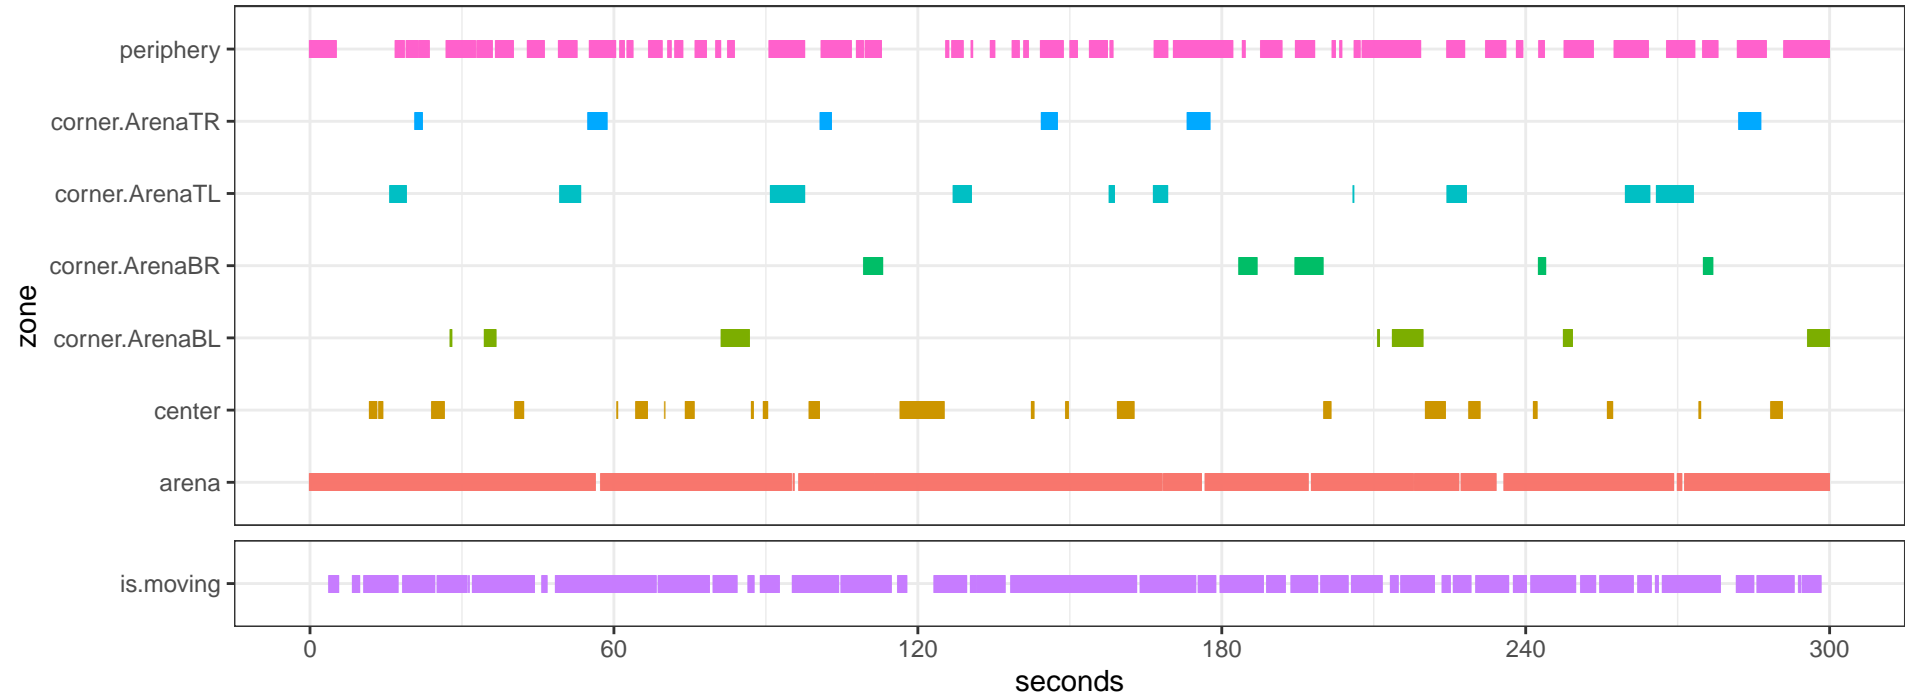

OF\_top\_DREADD\_41-BL2DLC\_resnet50\_OpenFieldDec23shuffle1\_600000\_filtered.csv

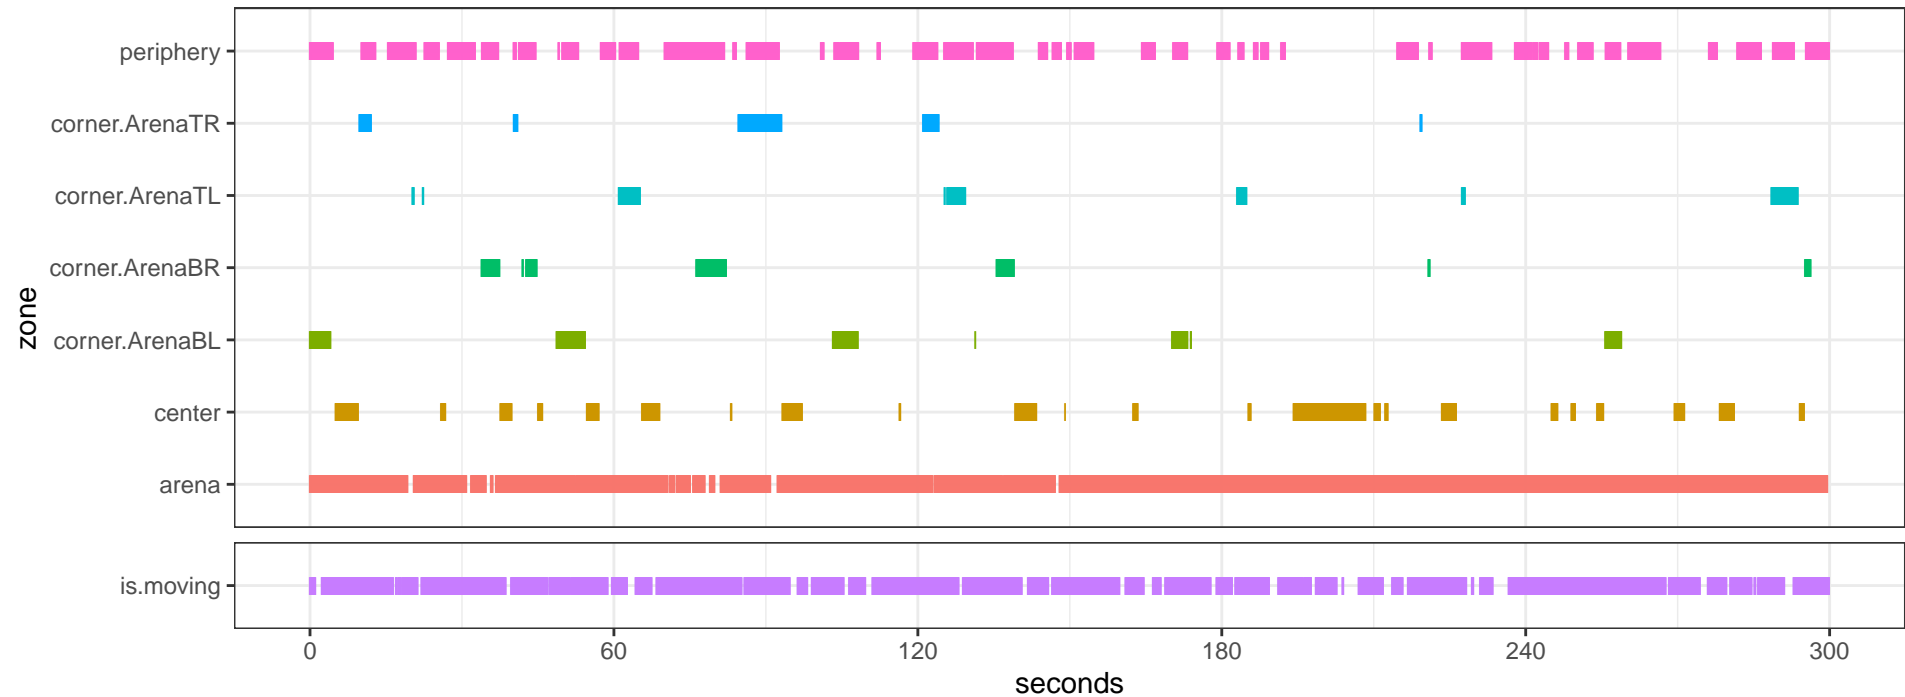

OF\_top\_DREADD\_41-Clo1DLC\_resnet50\_OpenFieldDec23shuffle1\_600000\_filtered.csv

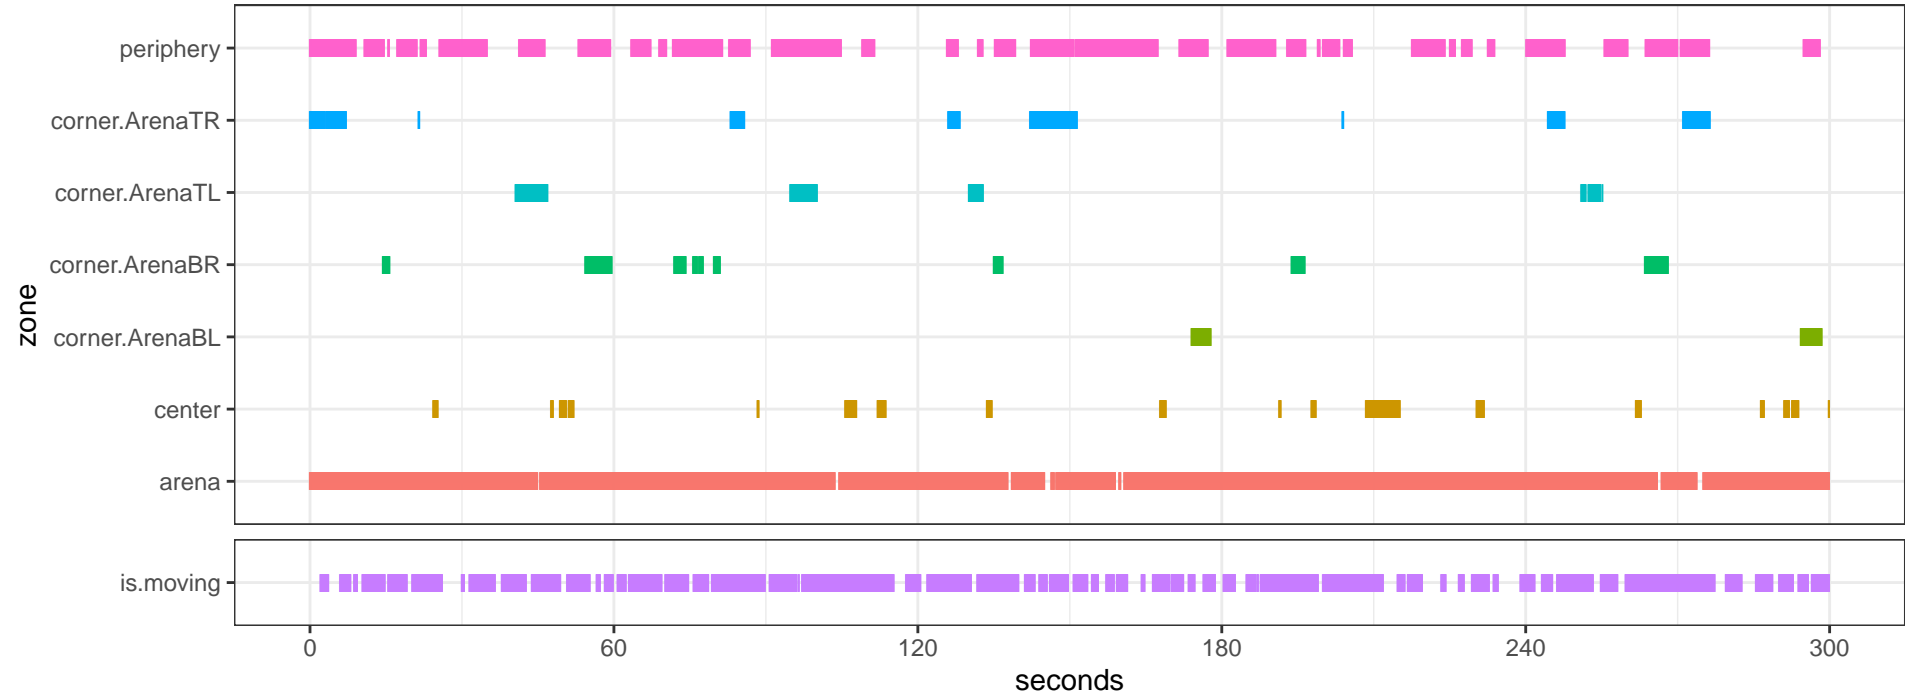

OF\_top\_DREADD\_41-Clo2DLC\_resnet50\_OpenFieldDec23shuffle1\_600000\_filtered.csv

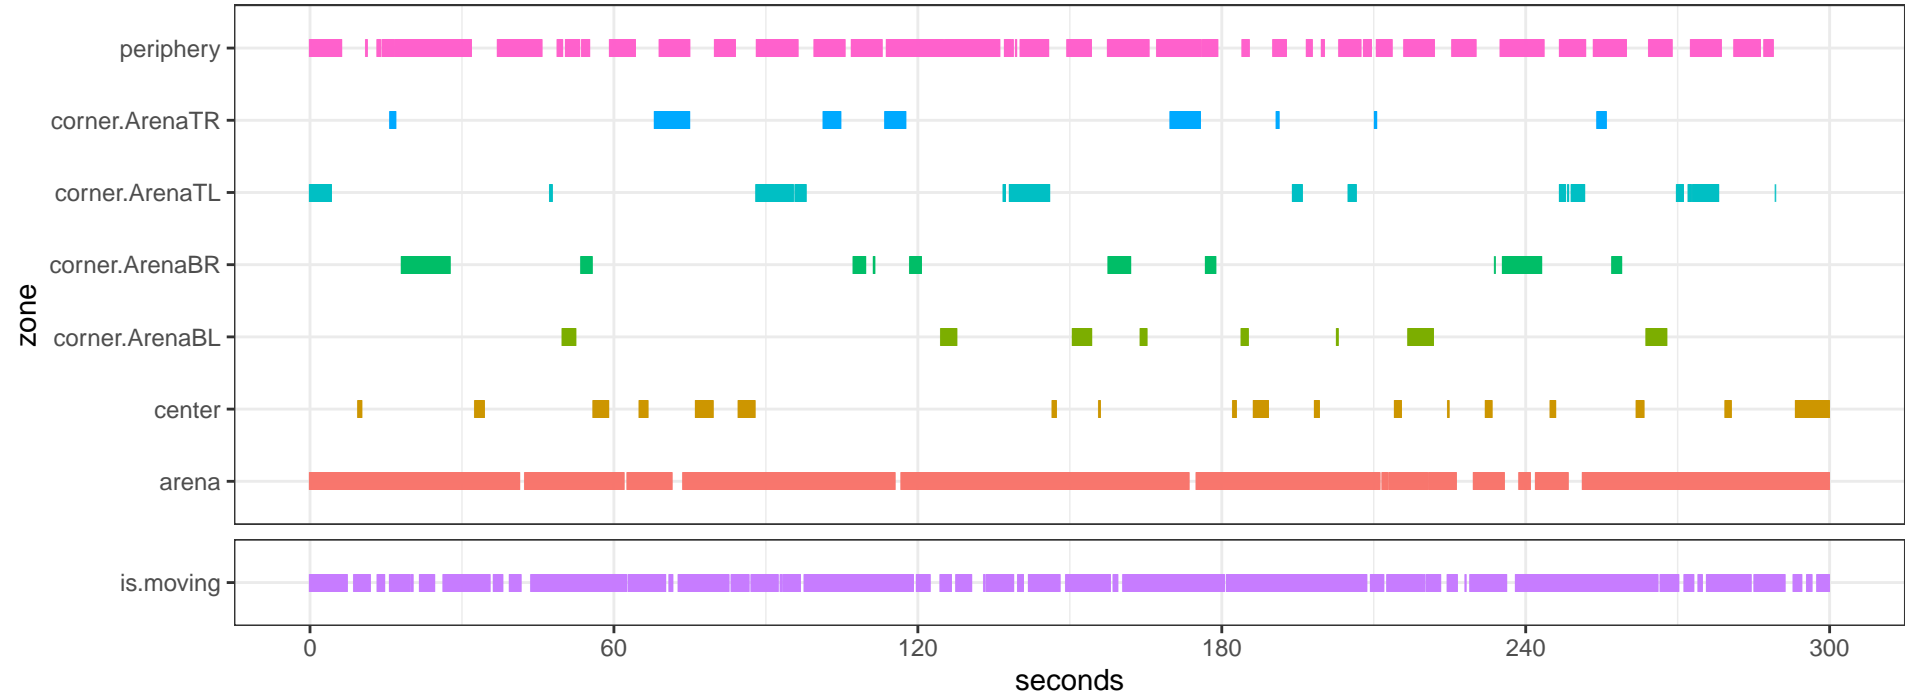

OF\_top\_DREADD\_82-BL1DLC\_resnet50\_OpenFieldDec23shuffle1\_600000\_filtered.csv

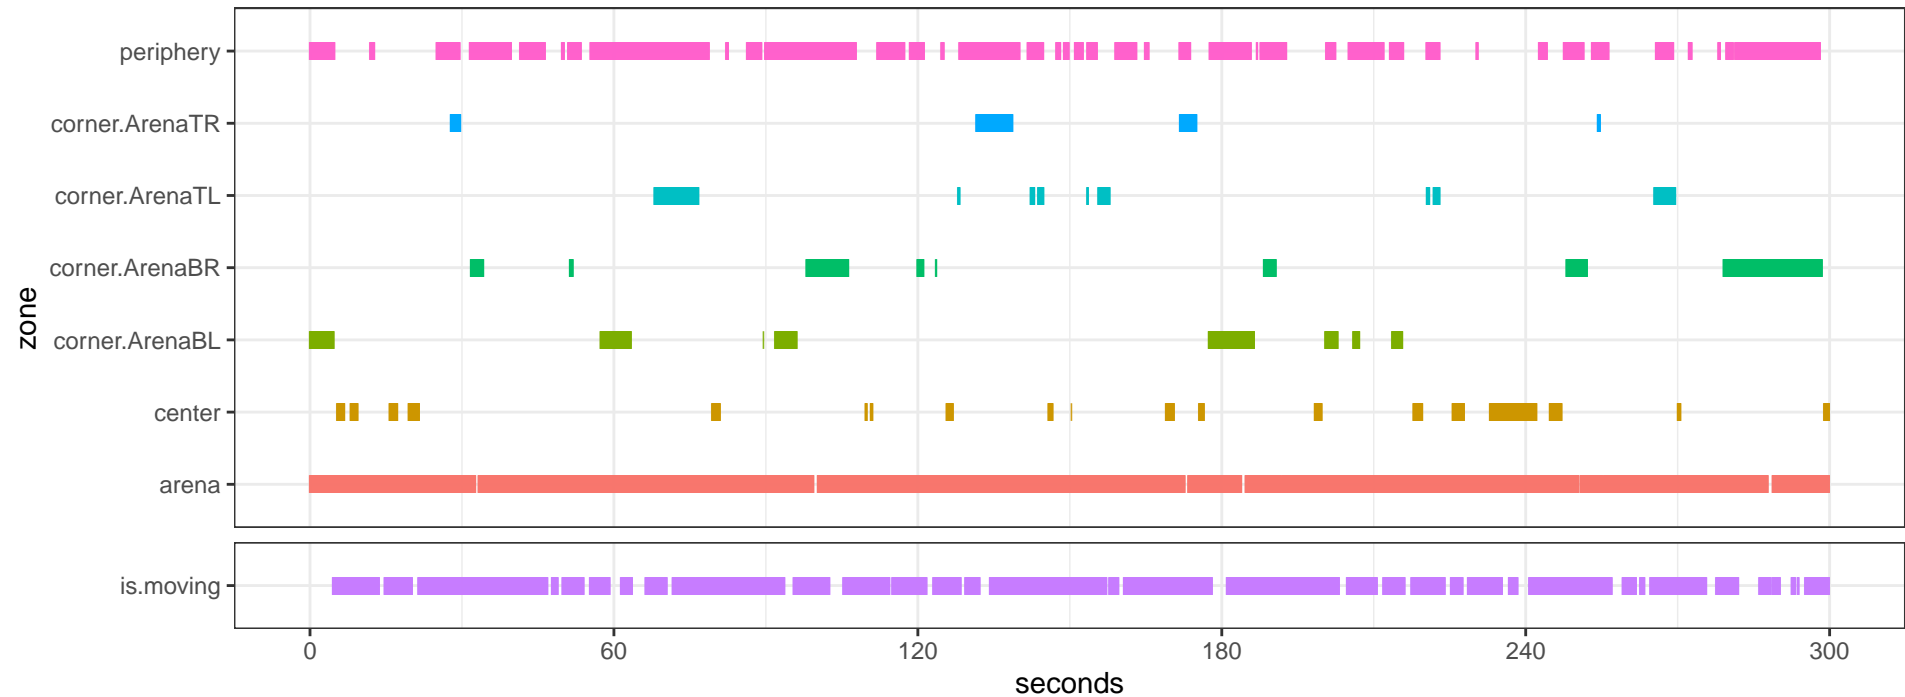

OF\_top\_DREADD\_82-BL2DLC\_resnet50\_OpenFieldDec23shuffle1\_600000\_filtered.csv

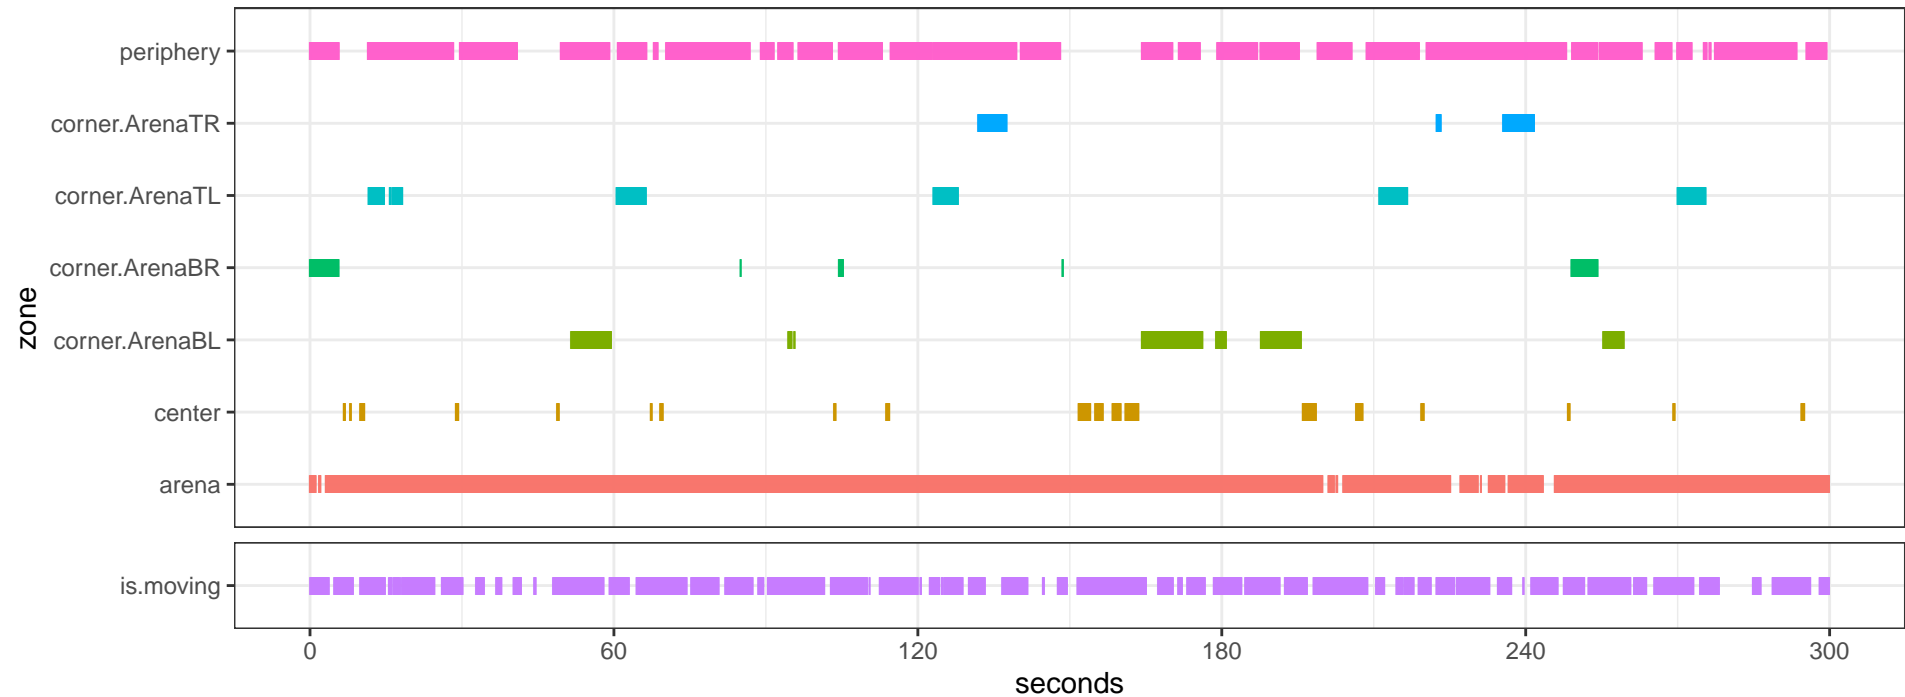

OF\_top\_DREADD\_82-Clo1DLC\_resnet50\_OpenFieldDec23shuffle1\_600000\_filtered.csv

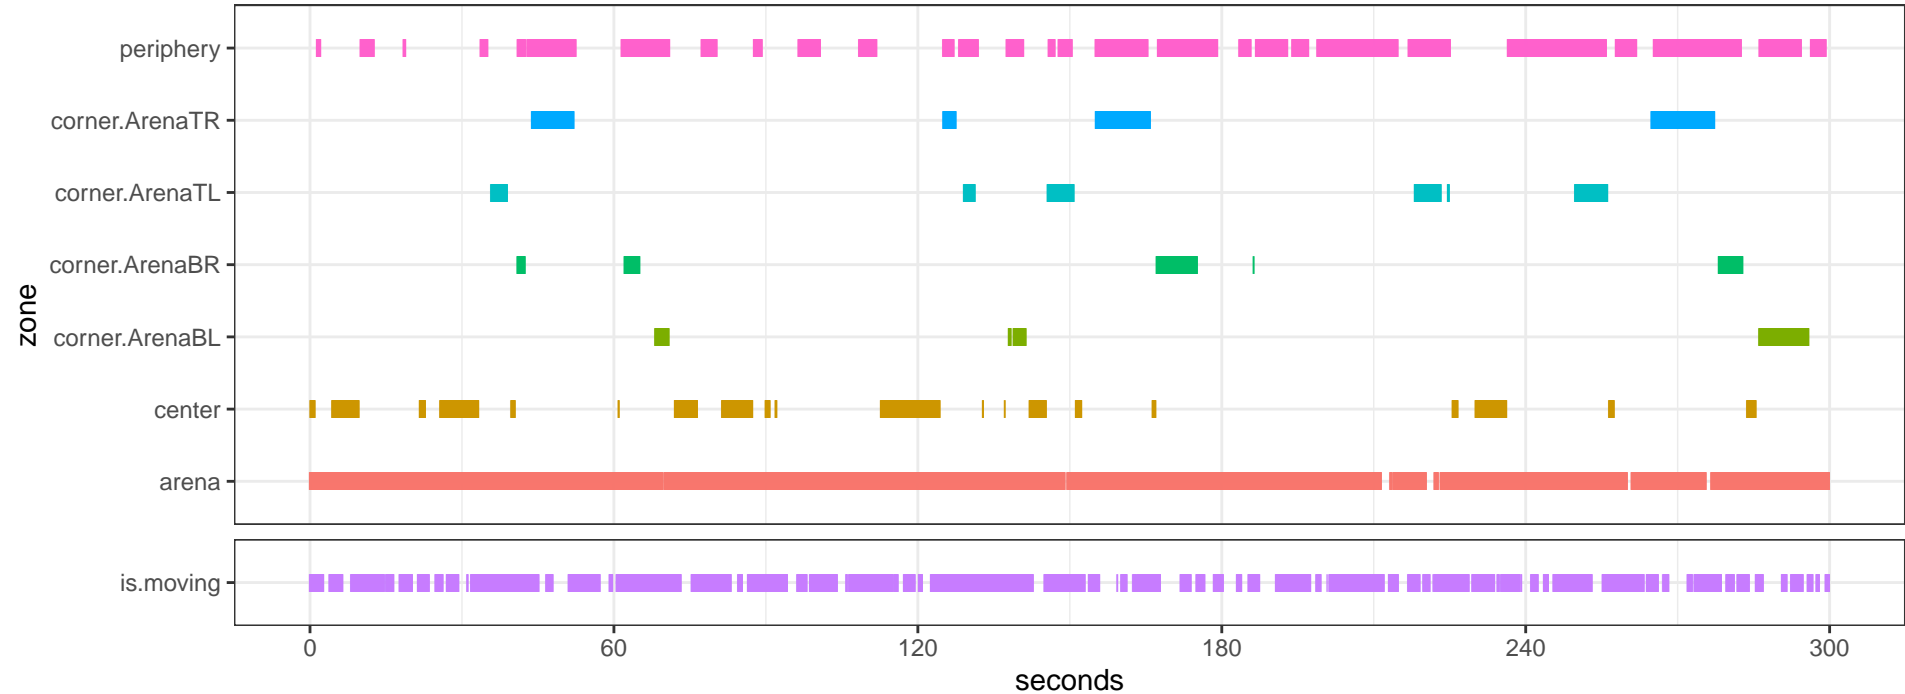

OF\_top\_DREADD\_82-Clo2DLC\_resnet50\_OpenFieldDec23shuffle1\_600000\_filtered.csv

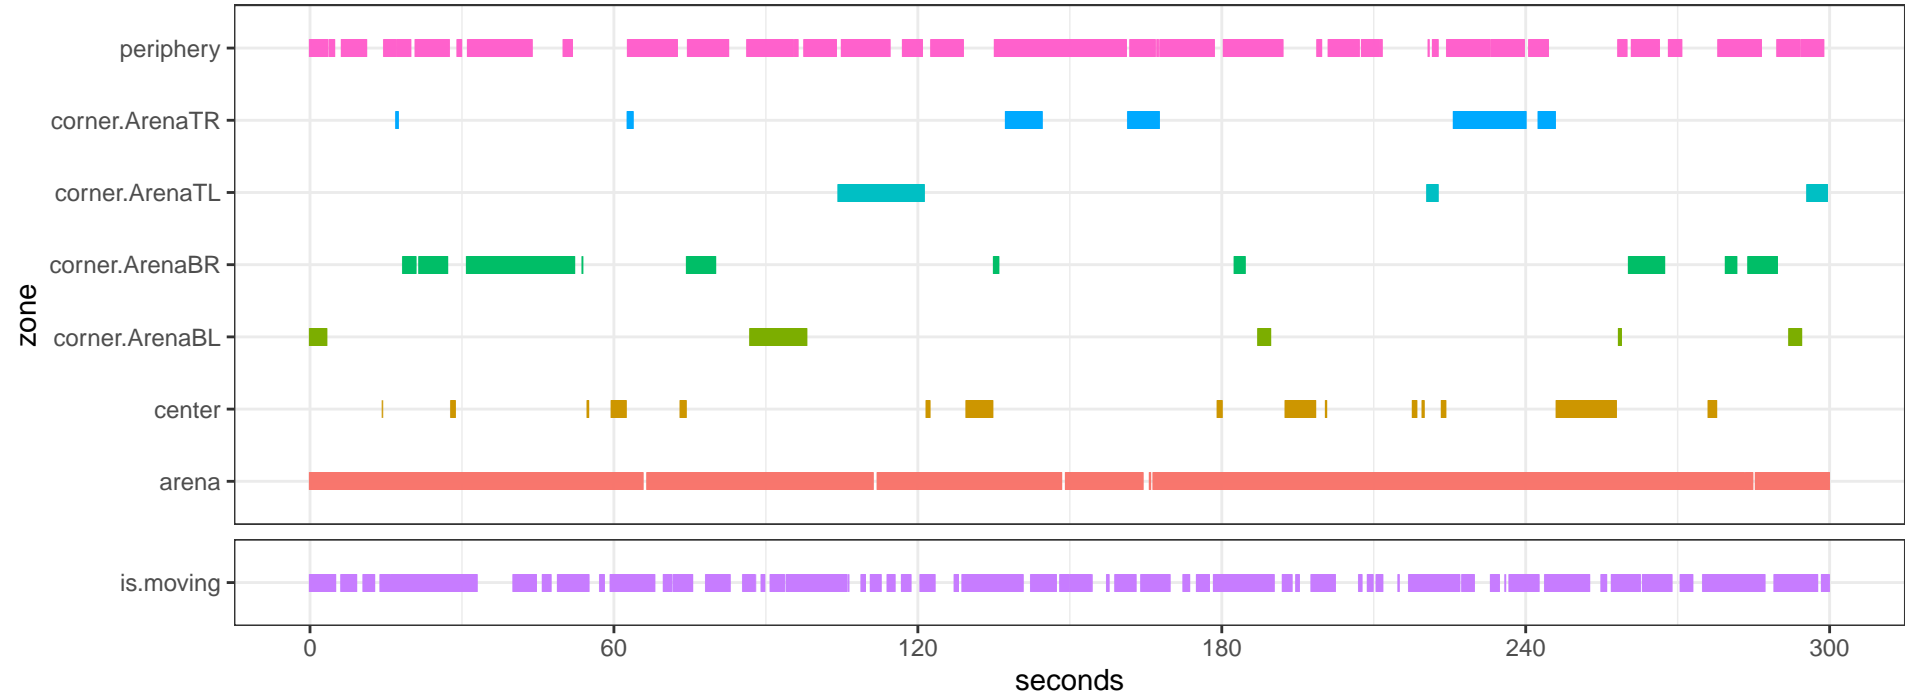



OF\_top\_DREADD\_83-BL1DLC\_resnet50\_OpenFieldDec23shuffle1\_600000\_filtered.csv

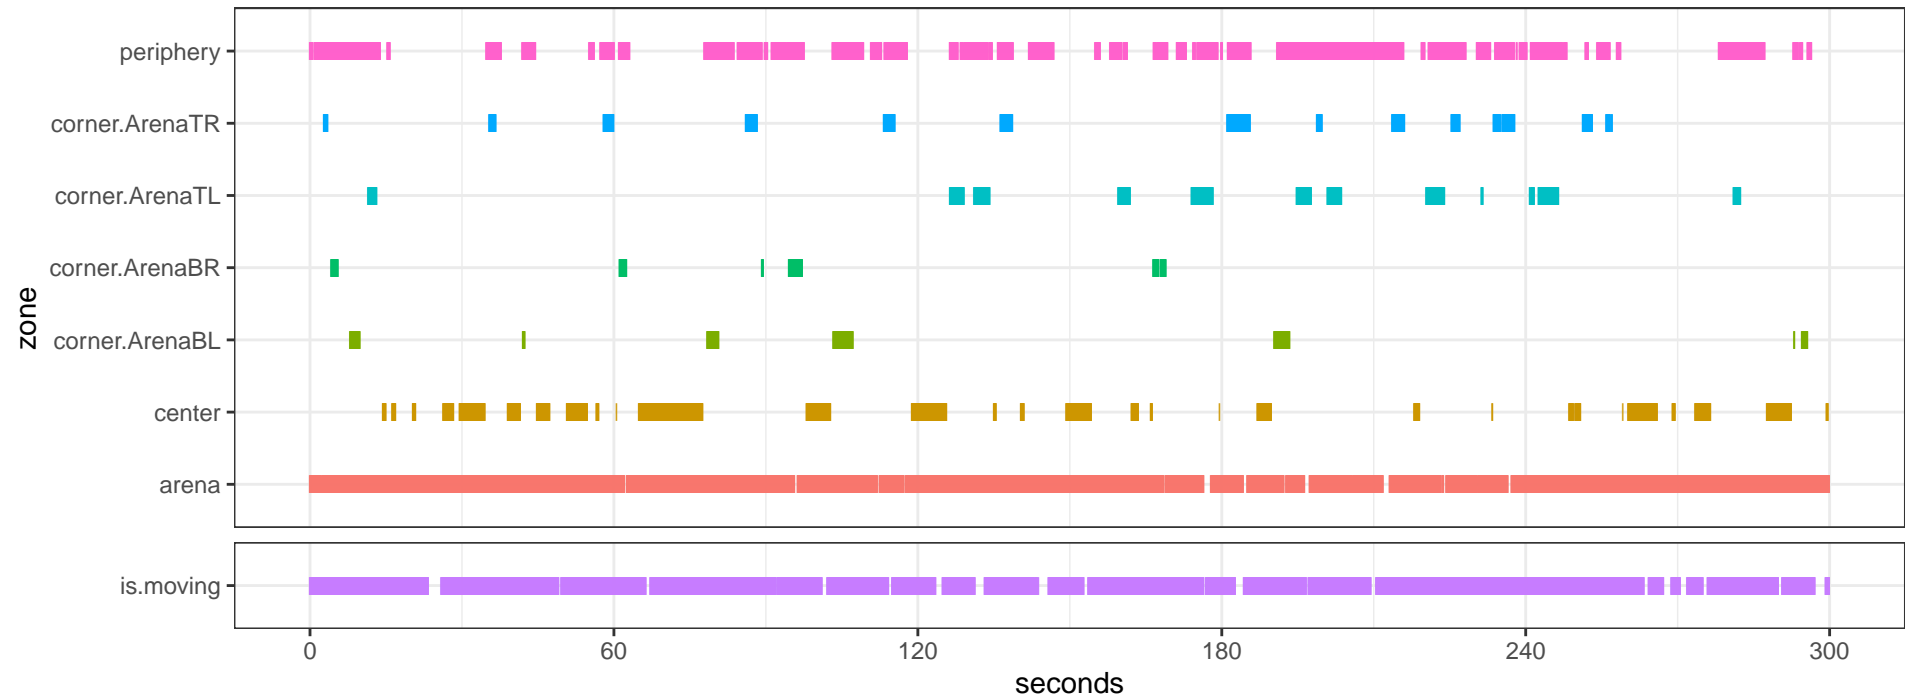

OF\_top\_DREADD\_83-BL2DLC\_resnet50\_OpenFieldDec23shuffle1\_600000\_filtered.csv

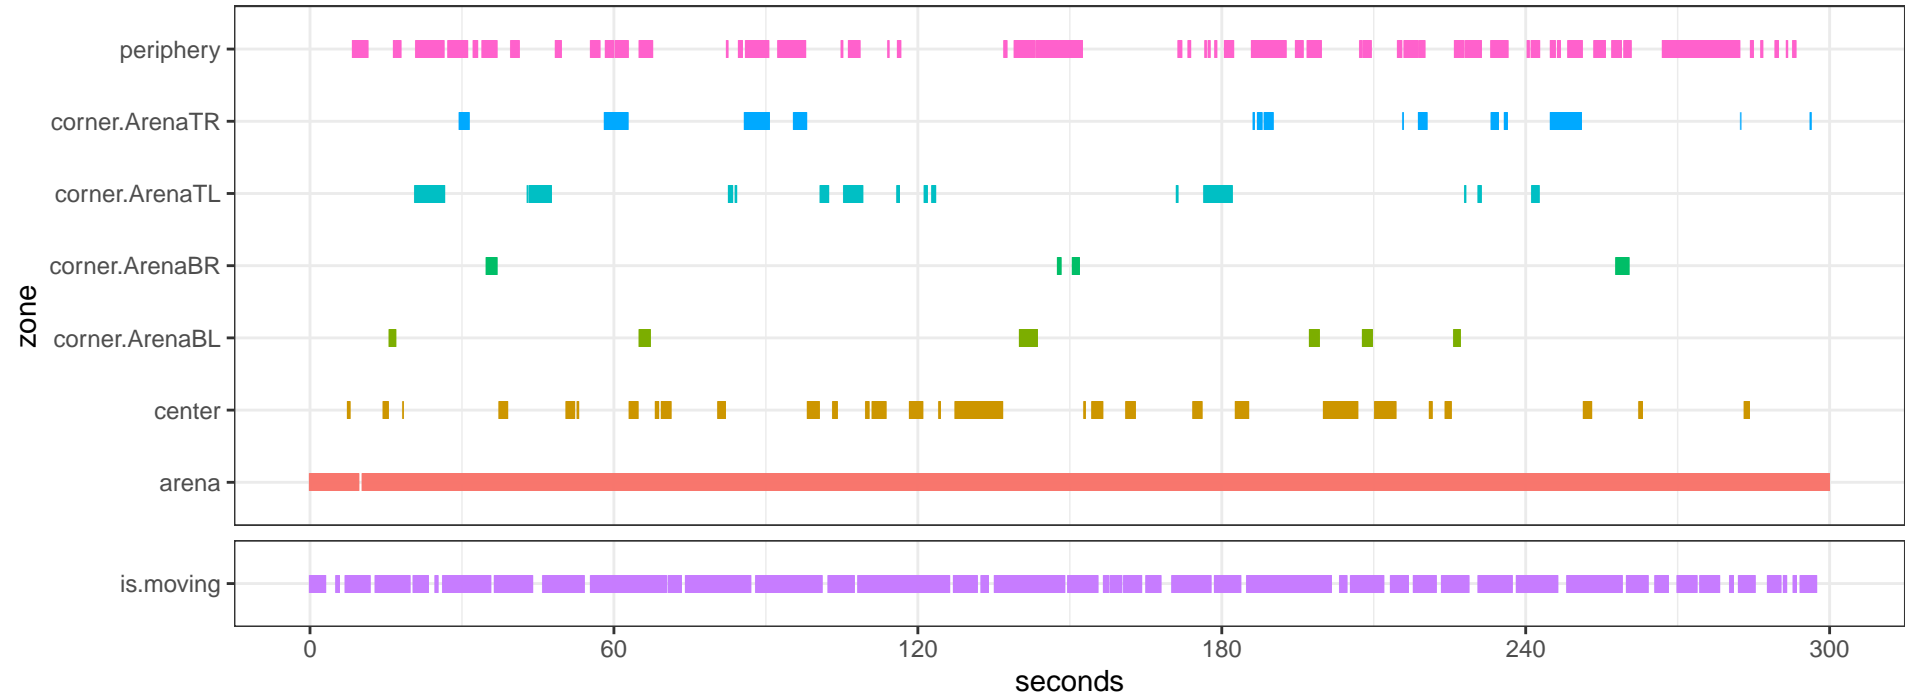

OF\_top\_DREADD\_83-Clo1DLC\_resnet50\_OpenFieldDec23shuffle1\_600000\_filtered.csv

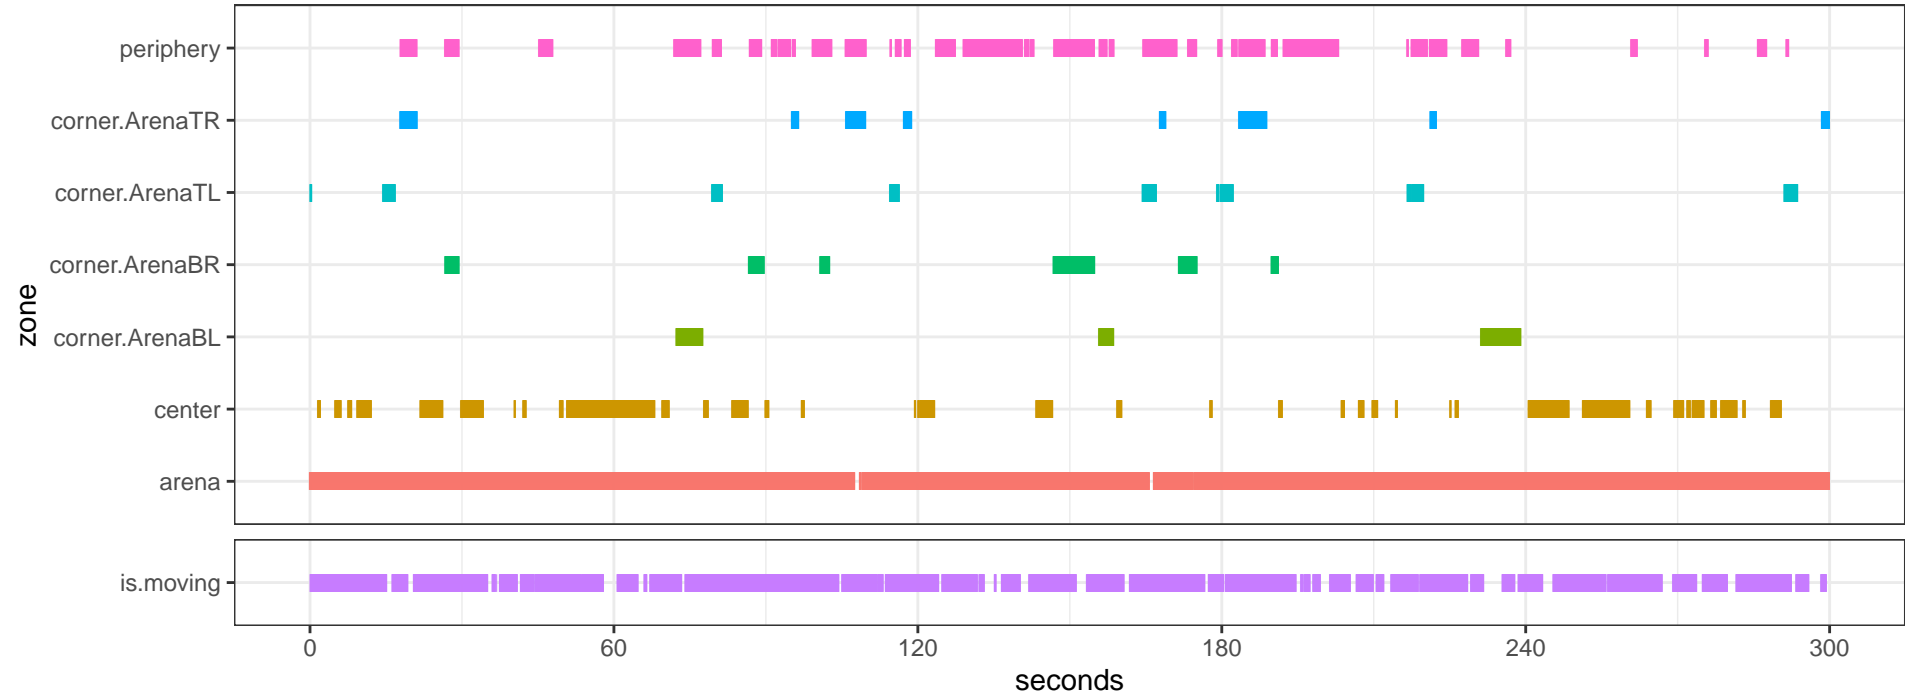

OF\_top\_DREADD\_83-Clo2DLC\_resnet50\_OpenFieldDec23shuffle1\_600000\_filtered.csv

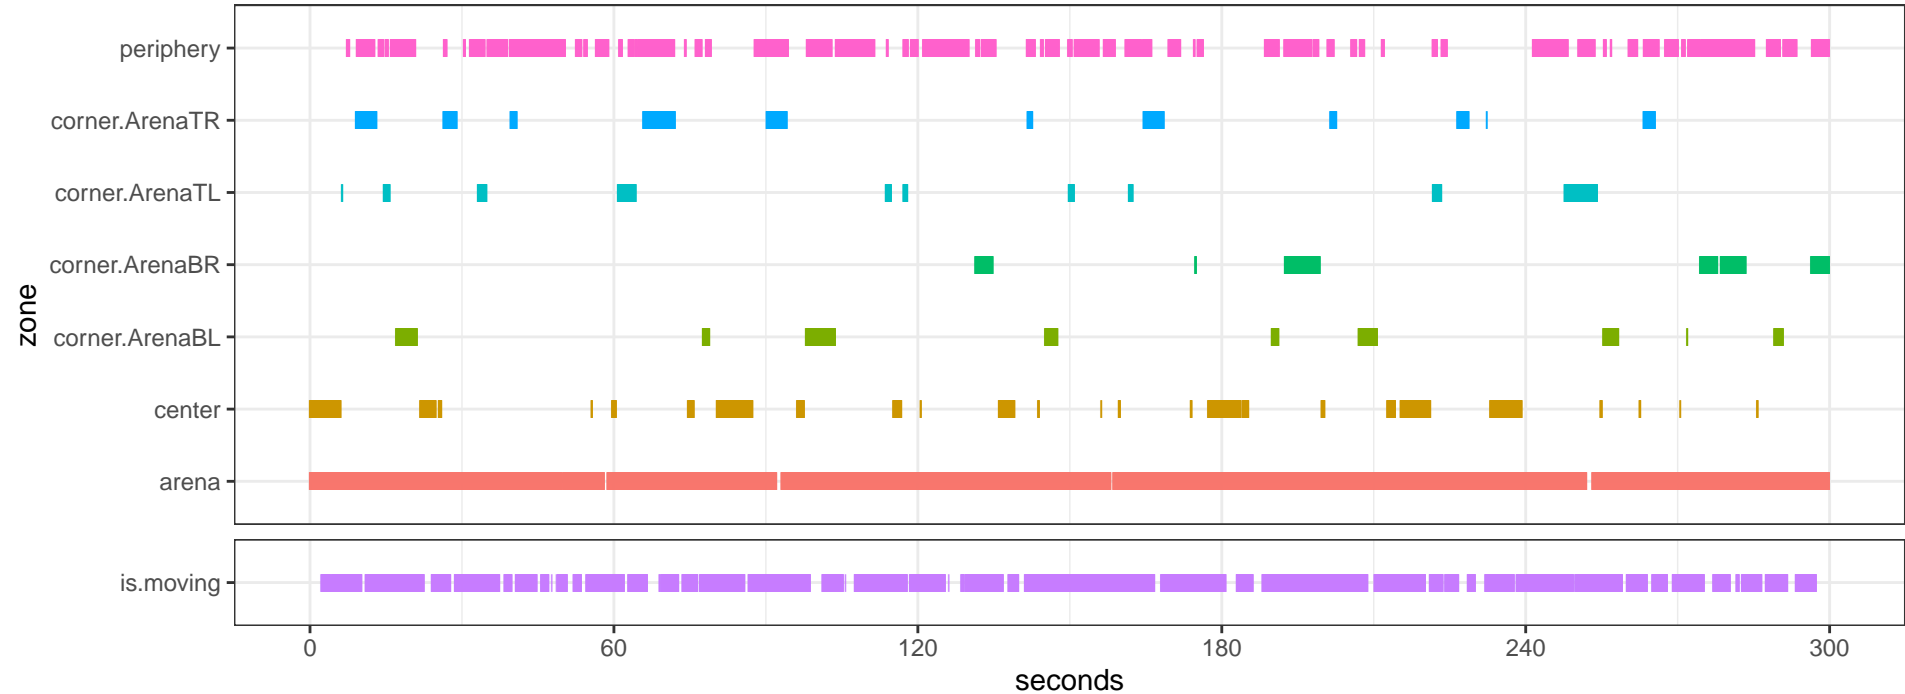

OF\_top\_DREADD\_91-BL1DLC\_resnet50\_OpenFieldDec23shuffle1\_600000\_filtered.csv

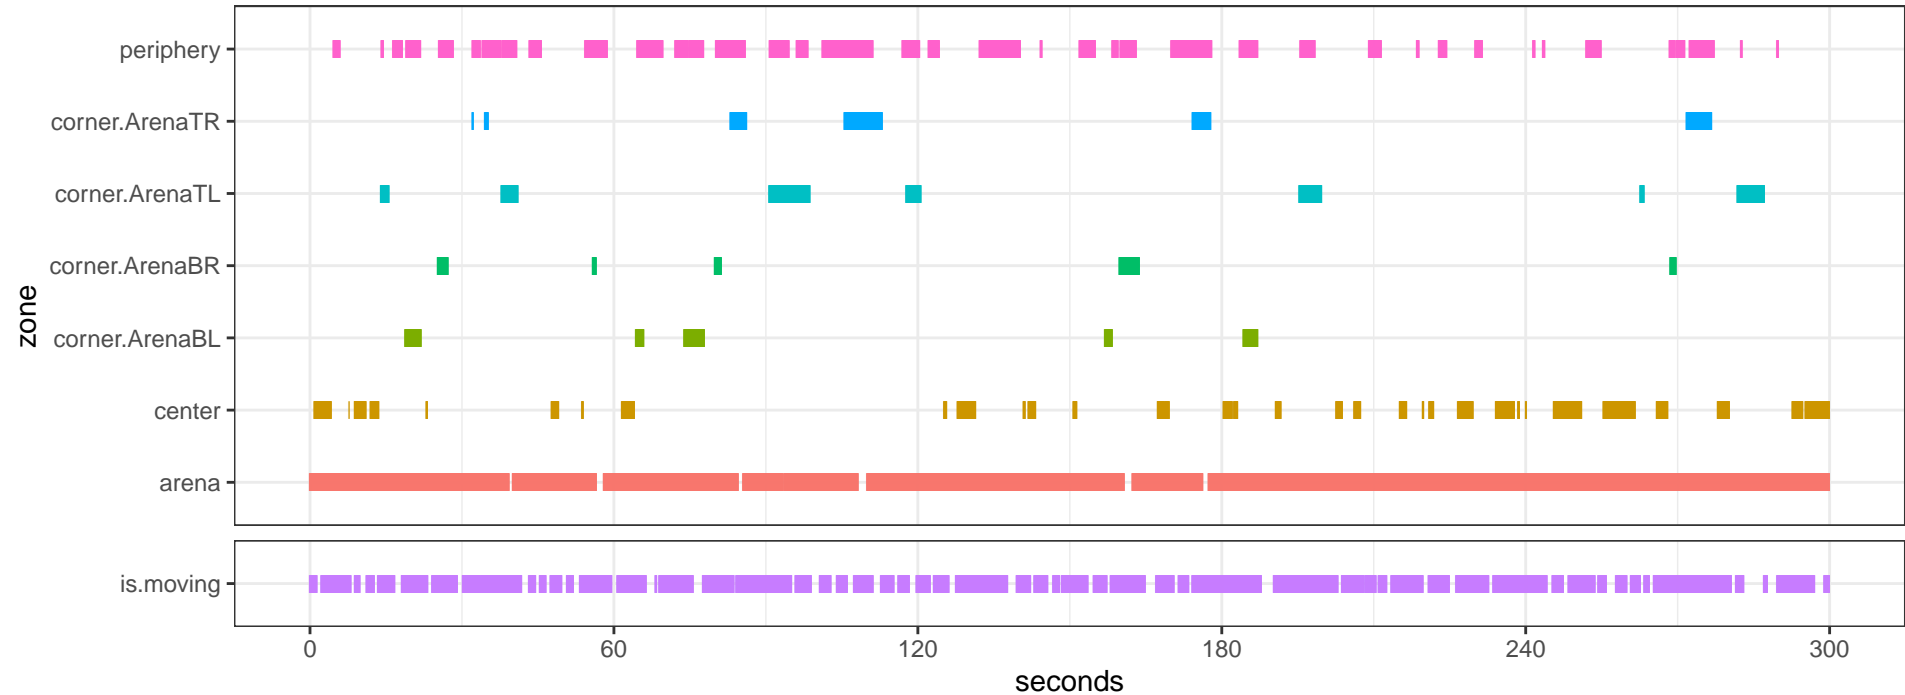

OF\_top\_DREADD\_91-BL2DLC\_resnet50\_OpenFieldDec23shuffle1\_600000\_filtered.csv

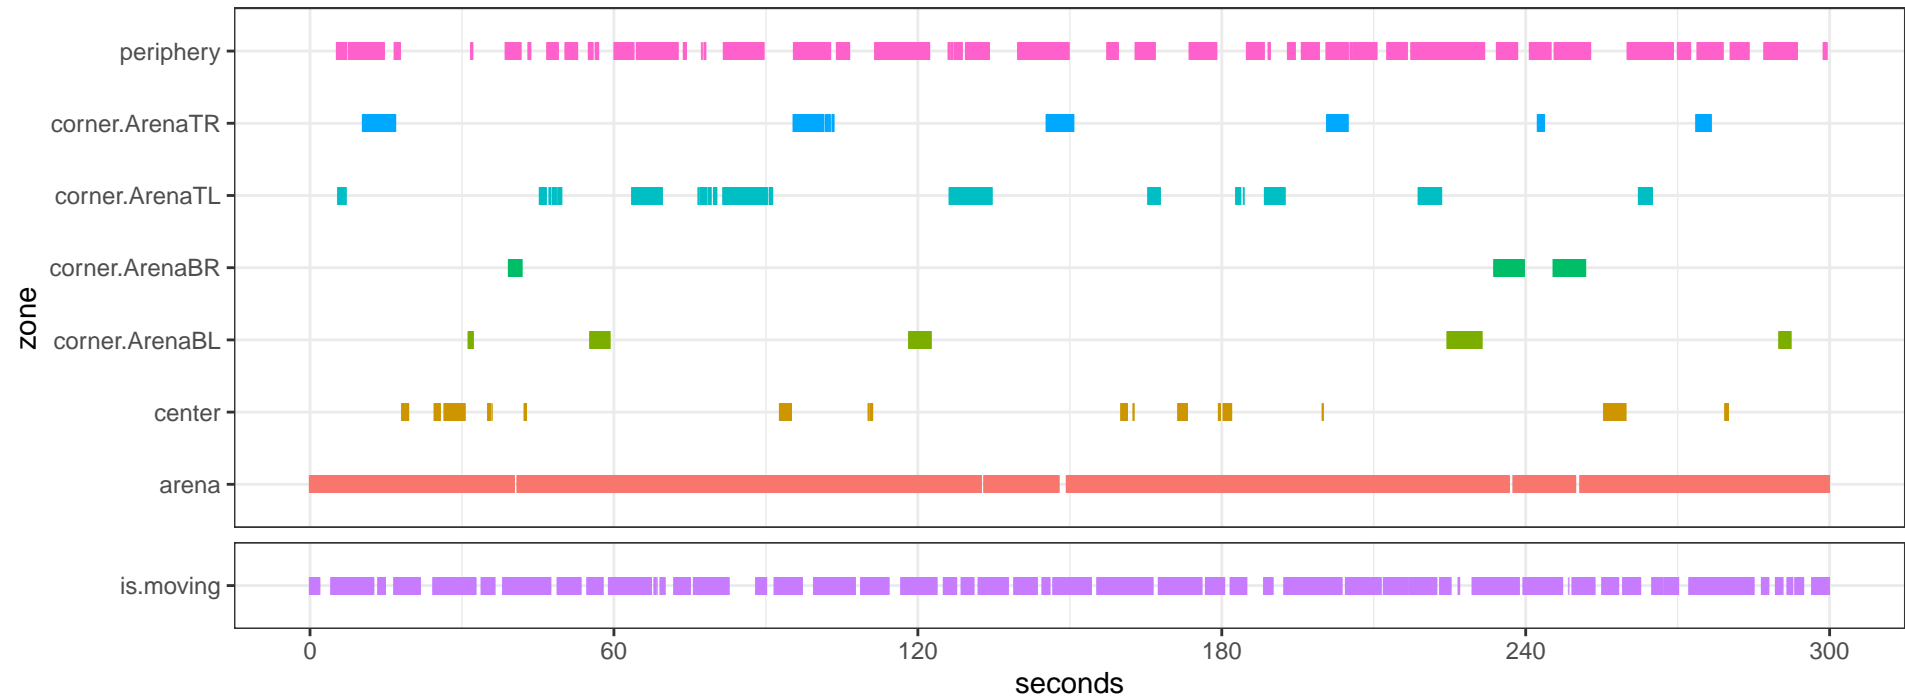

OF\_top\_DREADD\_91-Clo1DLC\_resnet50\_OpenFieldDec23shuffle1\_600000\_filtered.csv

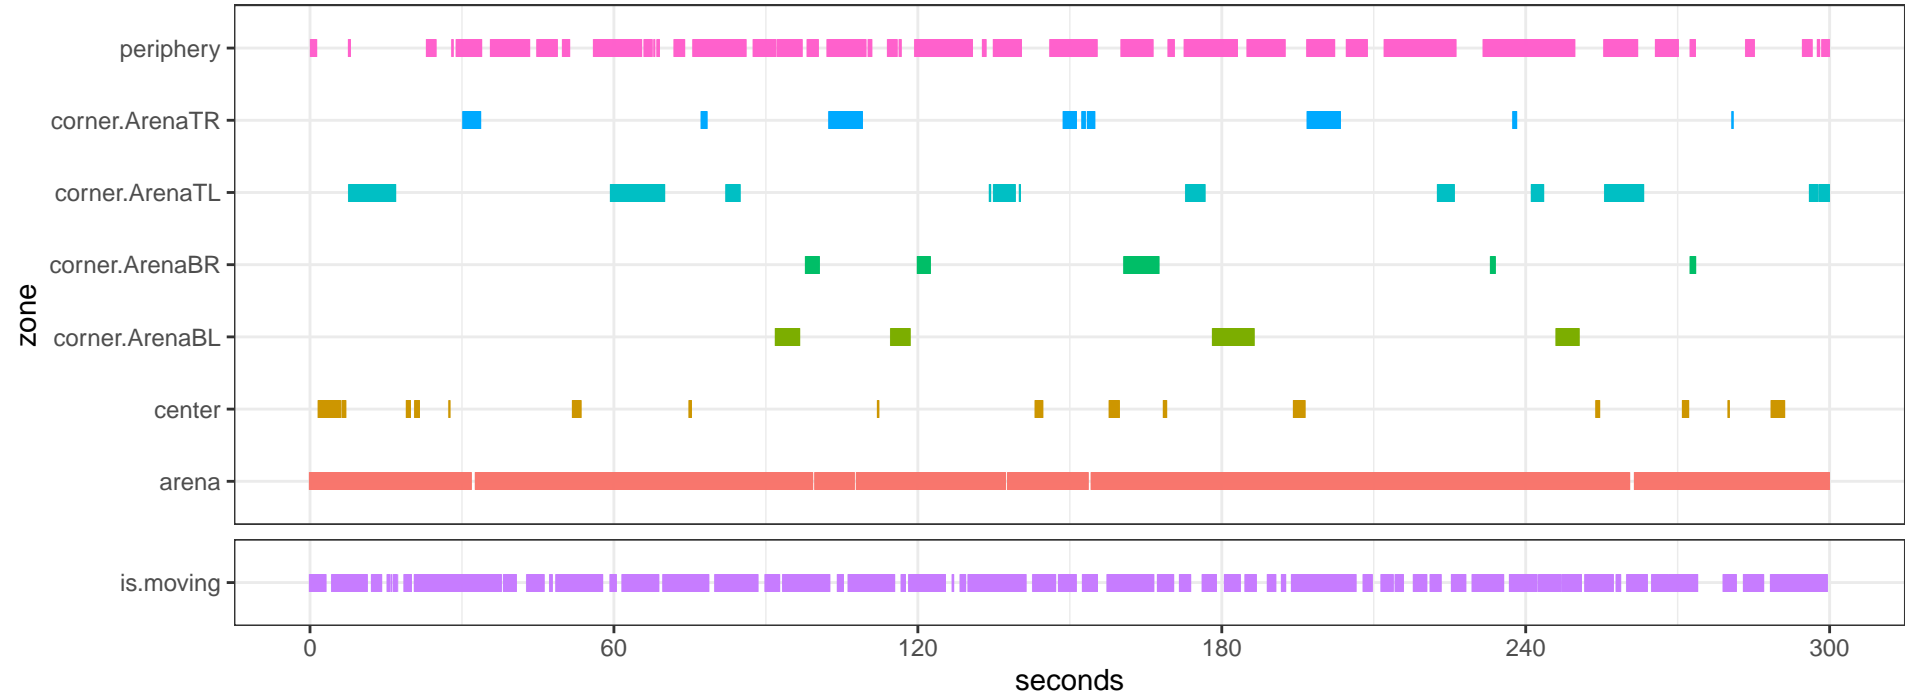

OF\_top\_DREADD\_91-Clo2DLC\_resnet50\_OpenFieldDec23shuffle1\_600000\_filtered.csv

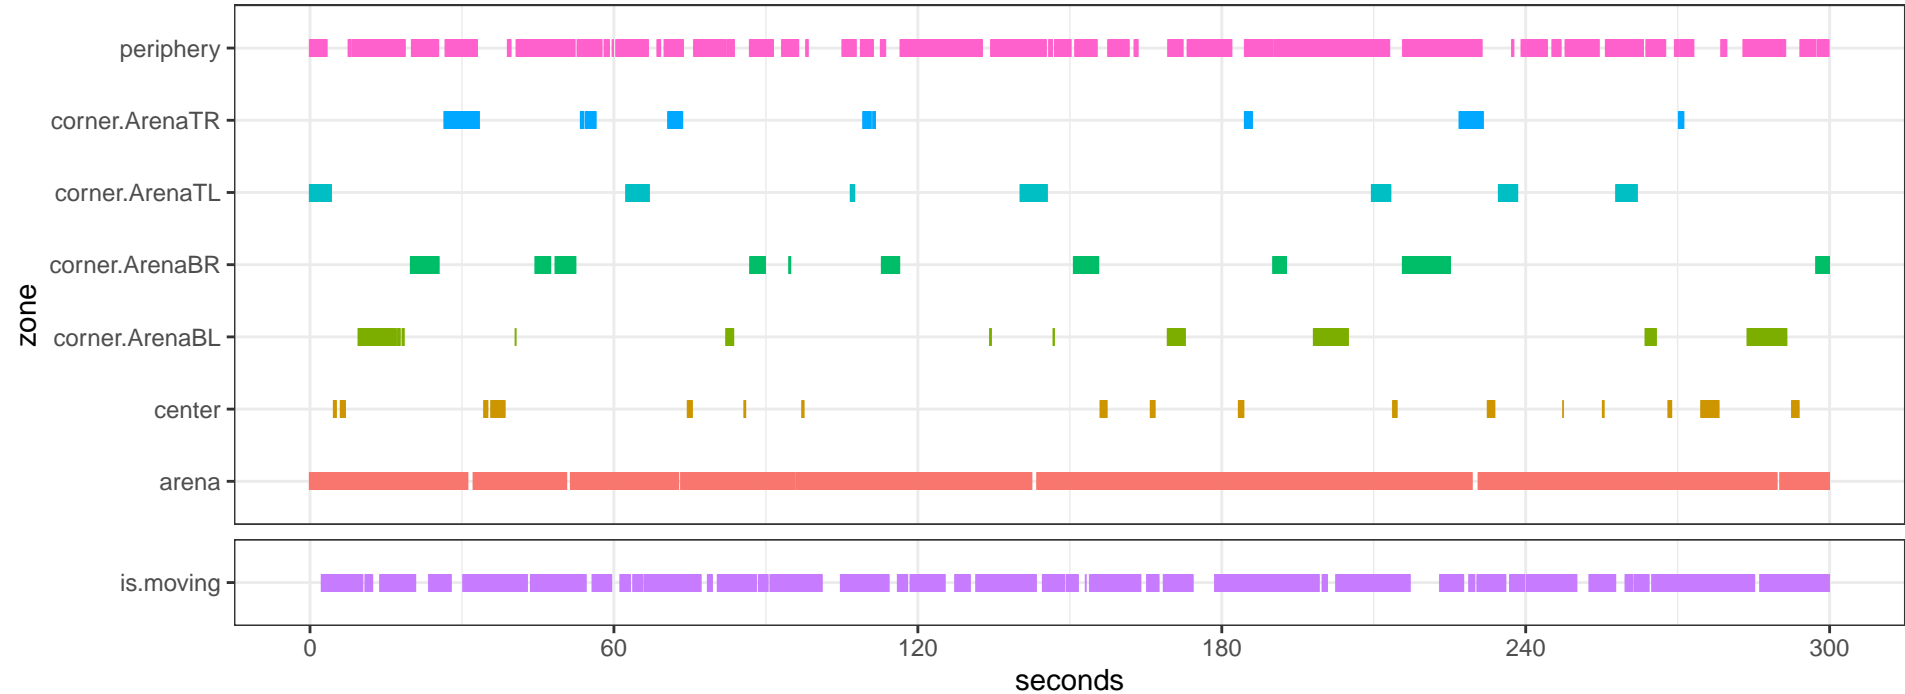



OF\_top\_DREADD\_92-BL2DLC\_resnet50\_OpenFieldDec23shuffle1\_600000\_filtered.csv

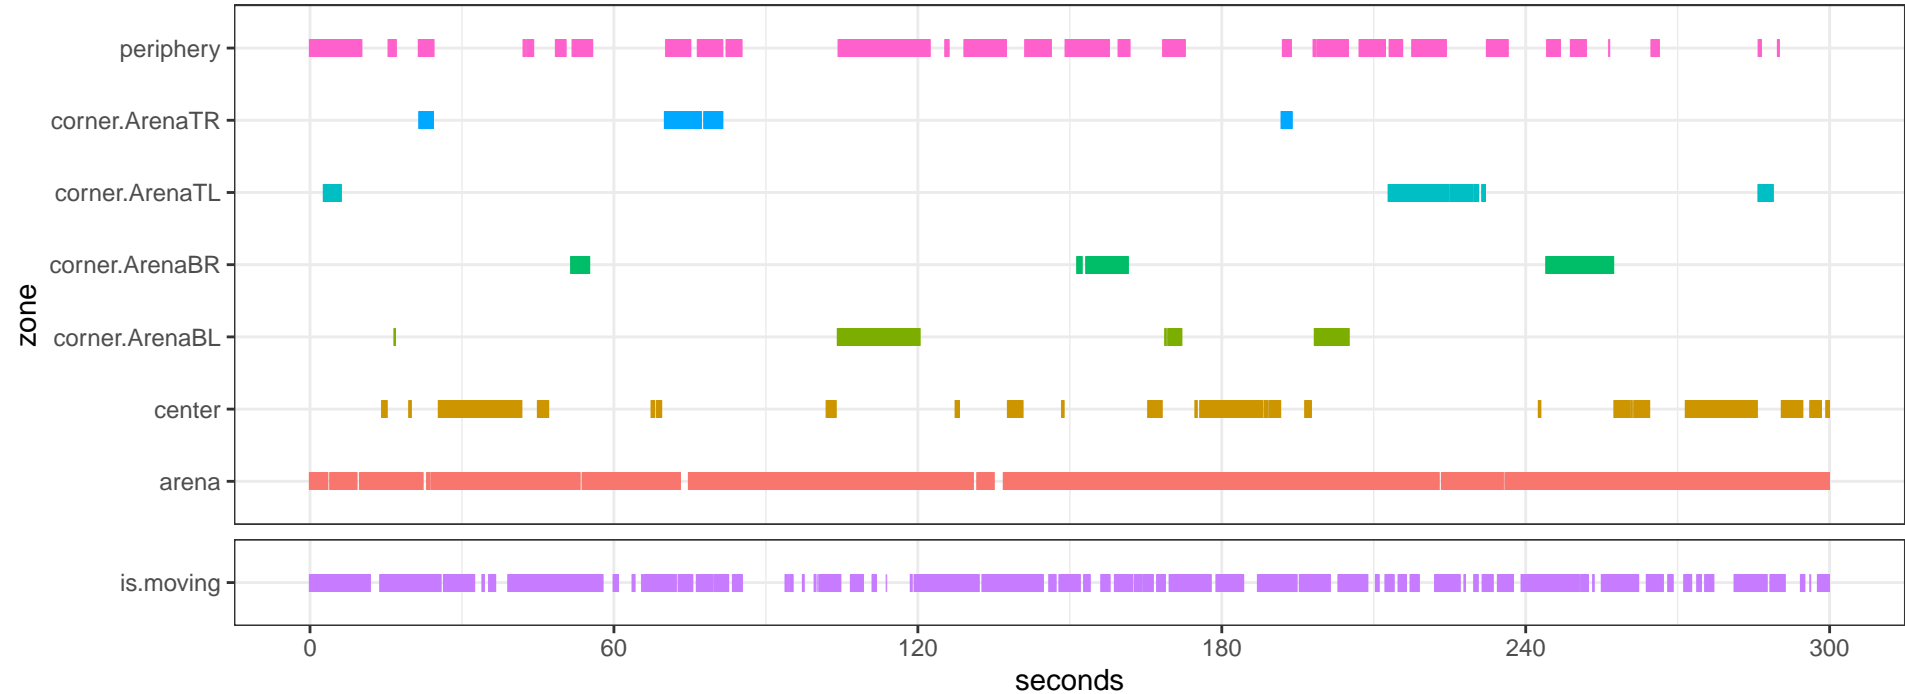

OF\_top\_DREADD\_92-Clo1DLC\_resnet50\_OpenFieldDec23shuffle1\_600000\_filtered.csv

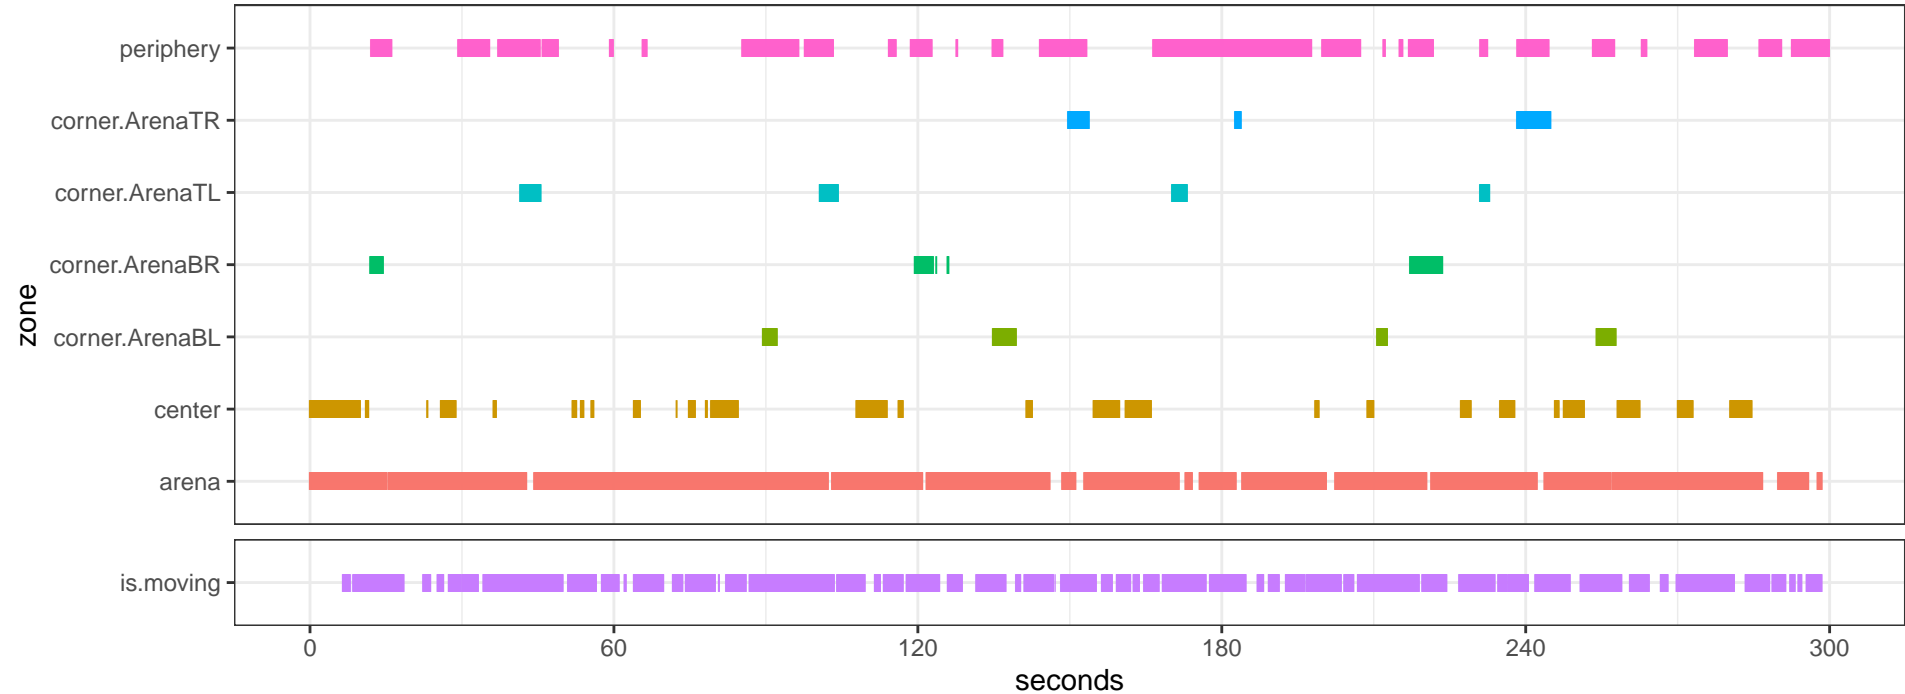

OF\_top\_DREADD\_92-Clo2DLC\_resnet50\_OpenFieldDec23shuffle1\_600000\_filtered.csv

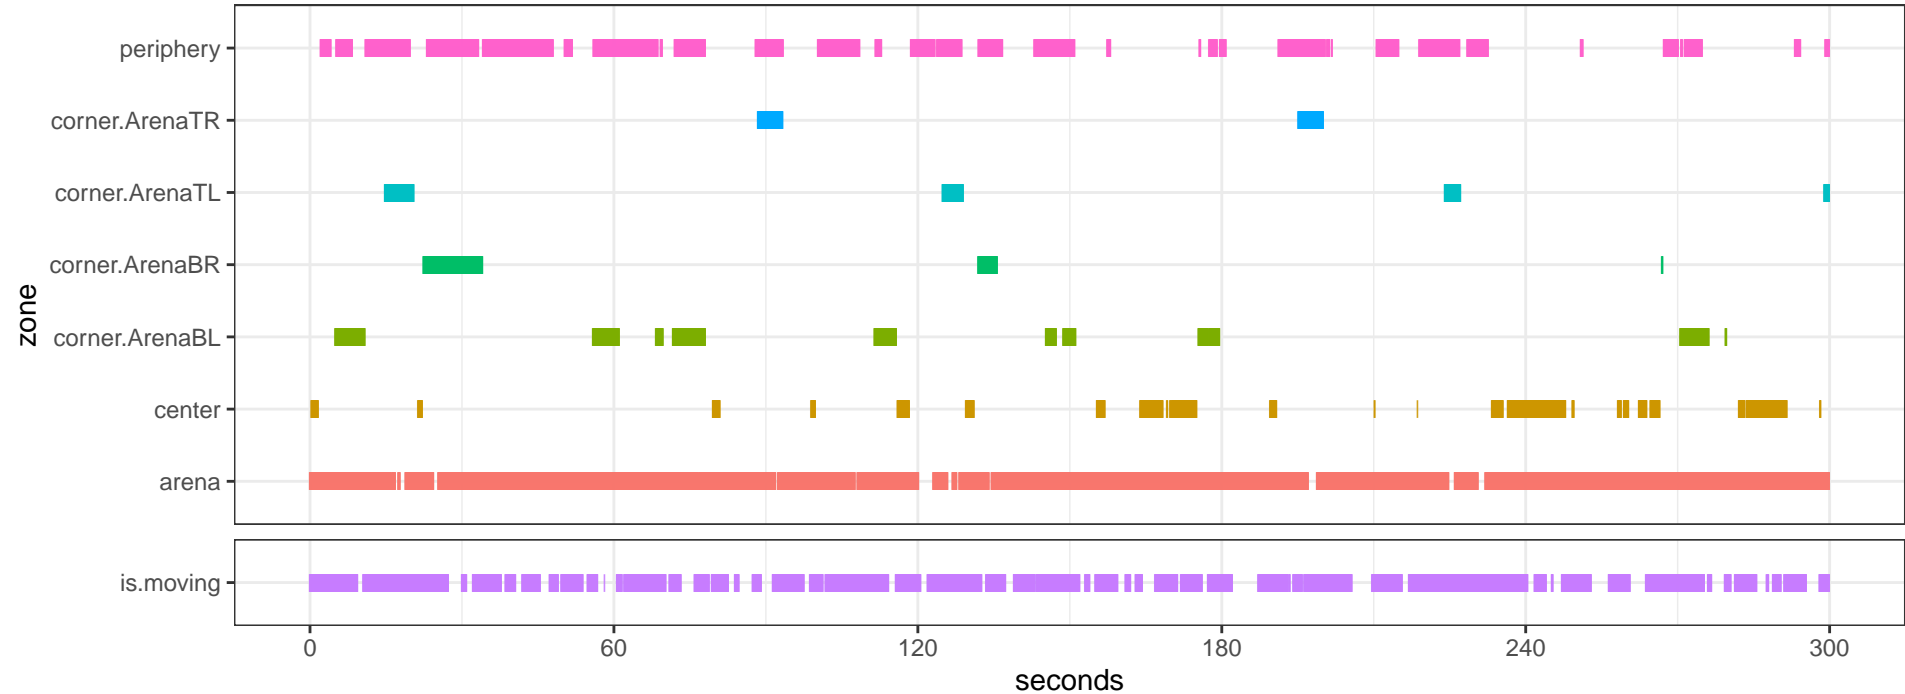

OF\_top\_DREADD\_94-BL1DLC\_resnet50\_OpenFieldDec23shuffle1\_600000\_filtered.csv

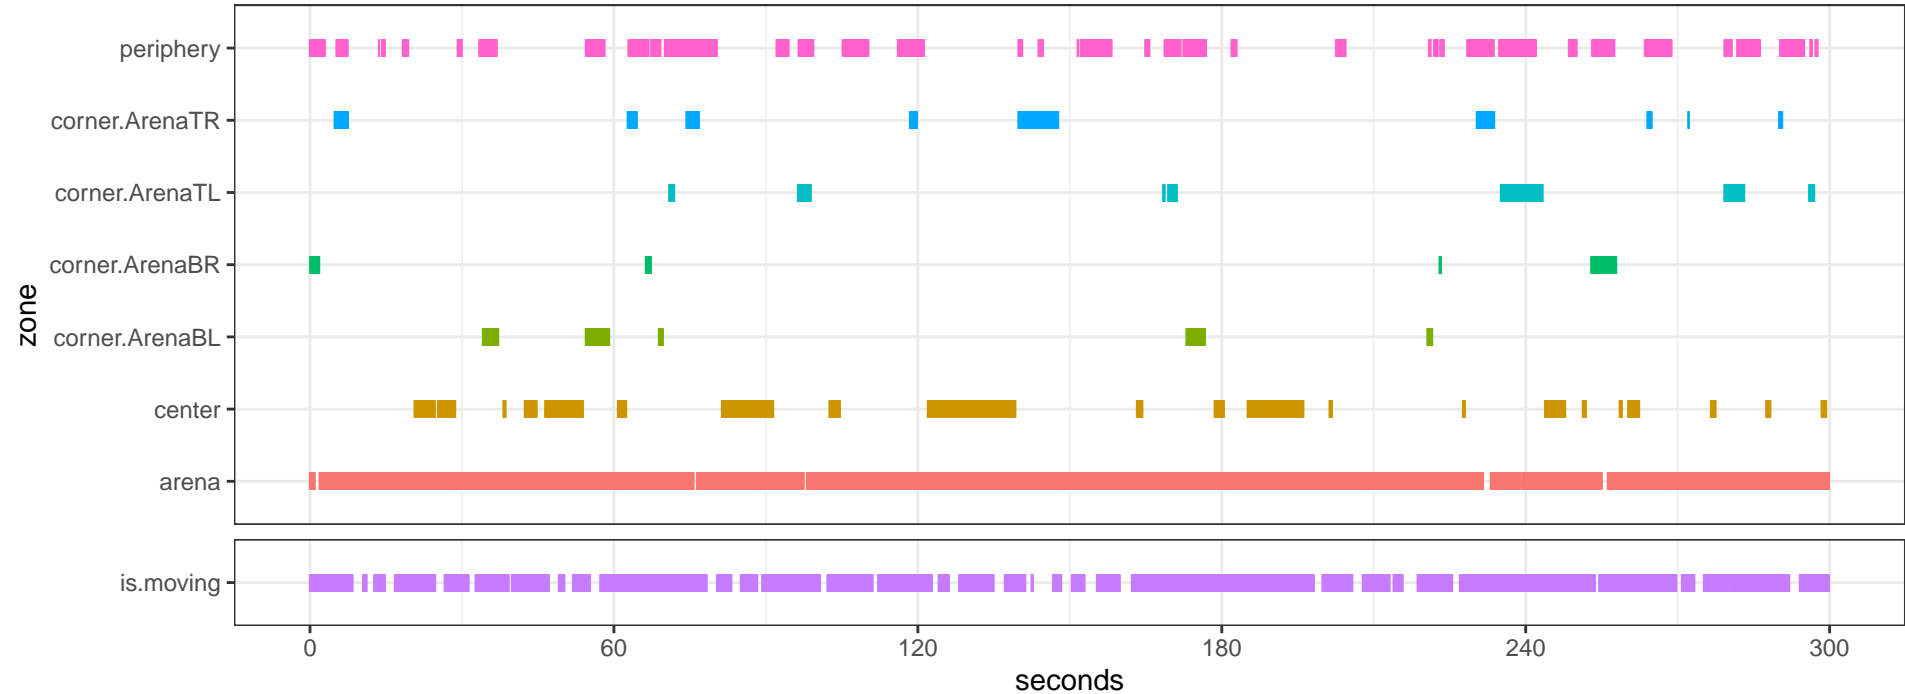

OF\_top\_DREADD\_94-BL2DLC\_resnet50\_OpenFieldDec23shuffle1\_600000\_filtered.csv

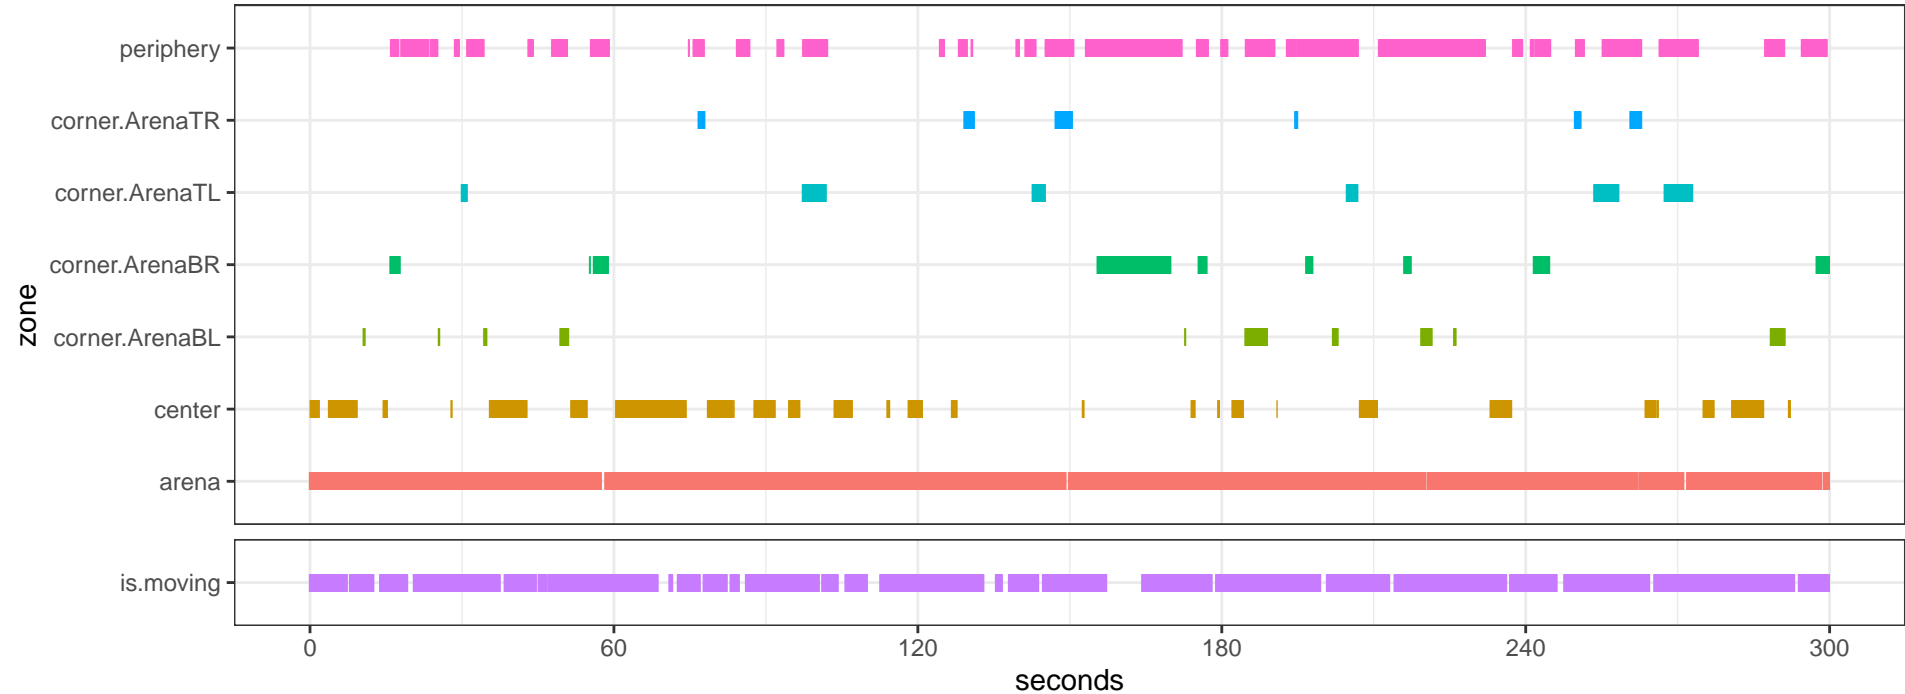

OF\_top\_DREADD\_94-Clo1DLC\_resnet50\_OpenFieldDec23shuffle1\_600000\_filtered.csv

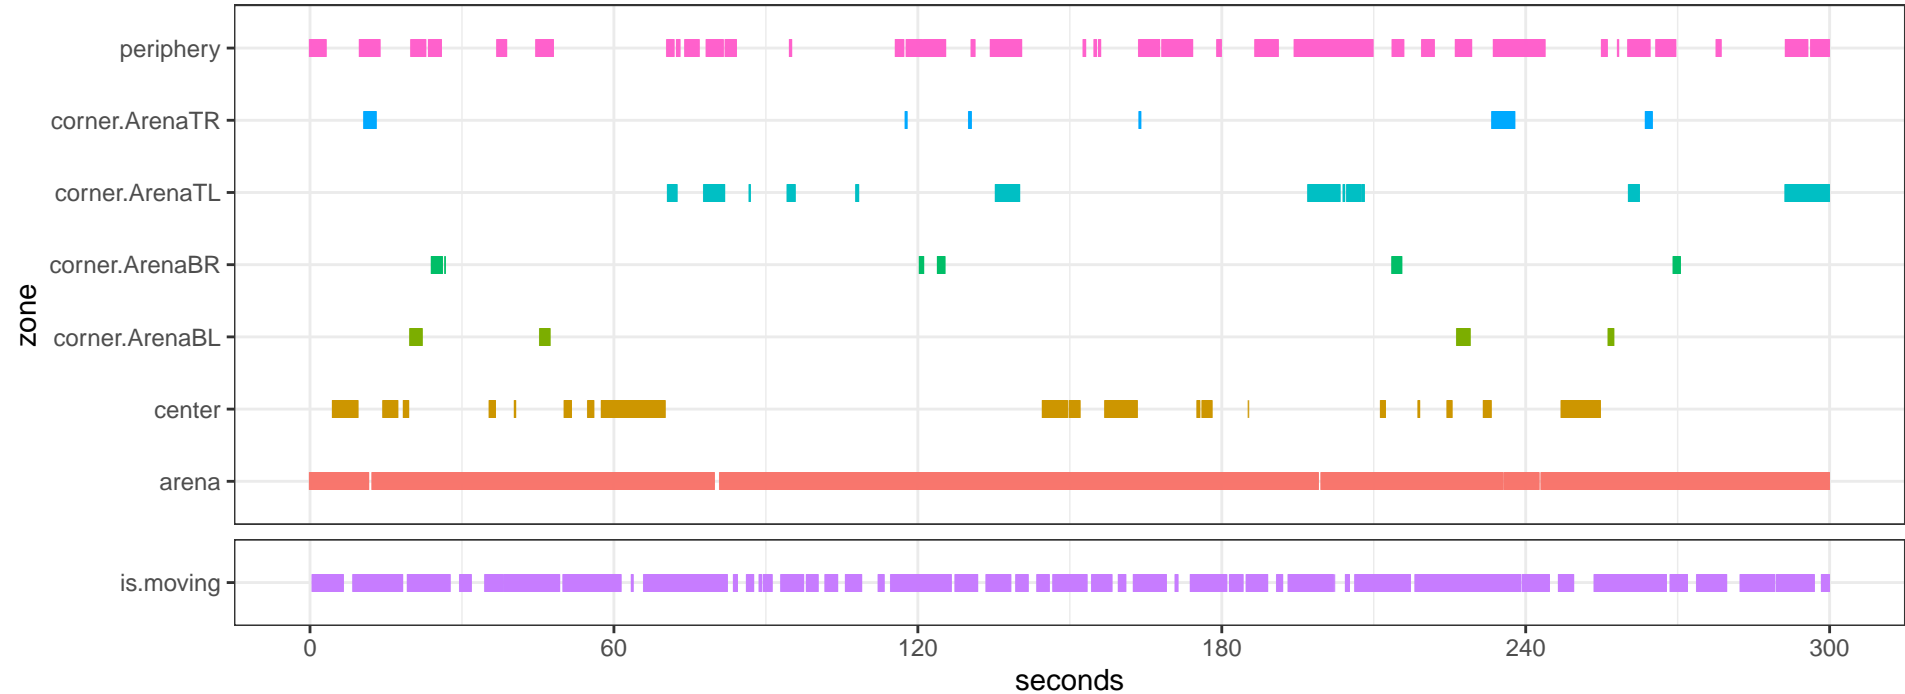

OF\_top\_DREADD\_94-Clo2DLC\_resnet50\_OpenFieldDec23shuffle1\_600000\_filtered.csv

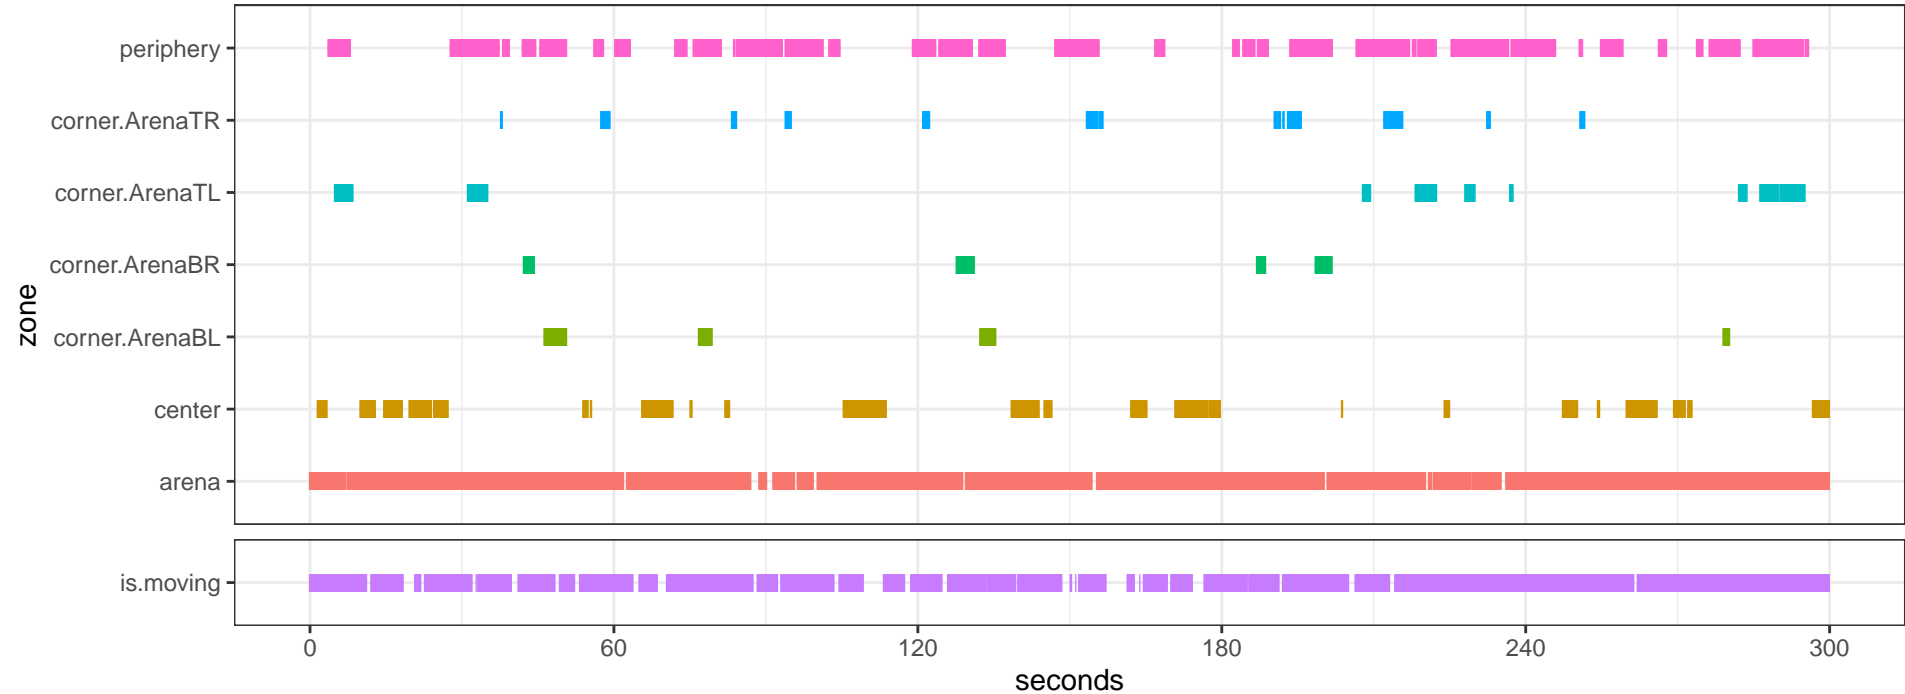

Supplement: elife-86737-supp2.pdf [file elife-86737-supp2.pdf]
