# Supplementary material for: Chemo- and optogenetic activation of hypothalamic Foxb1-expressing neurons and their terminal endings in the rostral-dorsolateral PAG leads to tachypnea, bradycardia, and immobility
Source: PubMed Central journal article supplement (PMC10945554; doi:10.7554/elife.86737), 2024-02-01

Occiput Maus\_106-21\_10\_MAH01020DLC\_resnet50\_OpenFieldDec23shuffle1\_600000\_filtered.csv

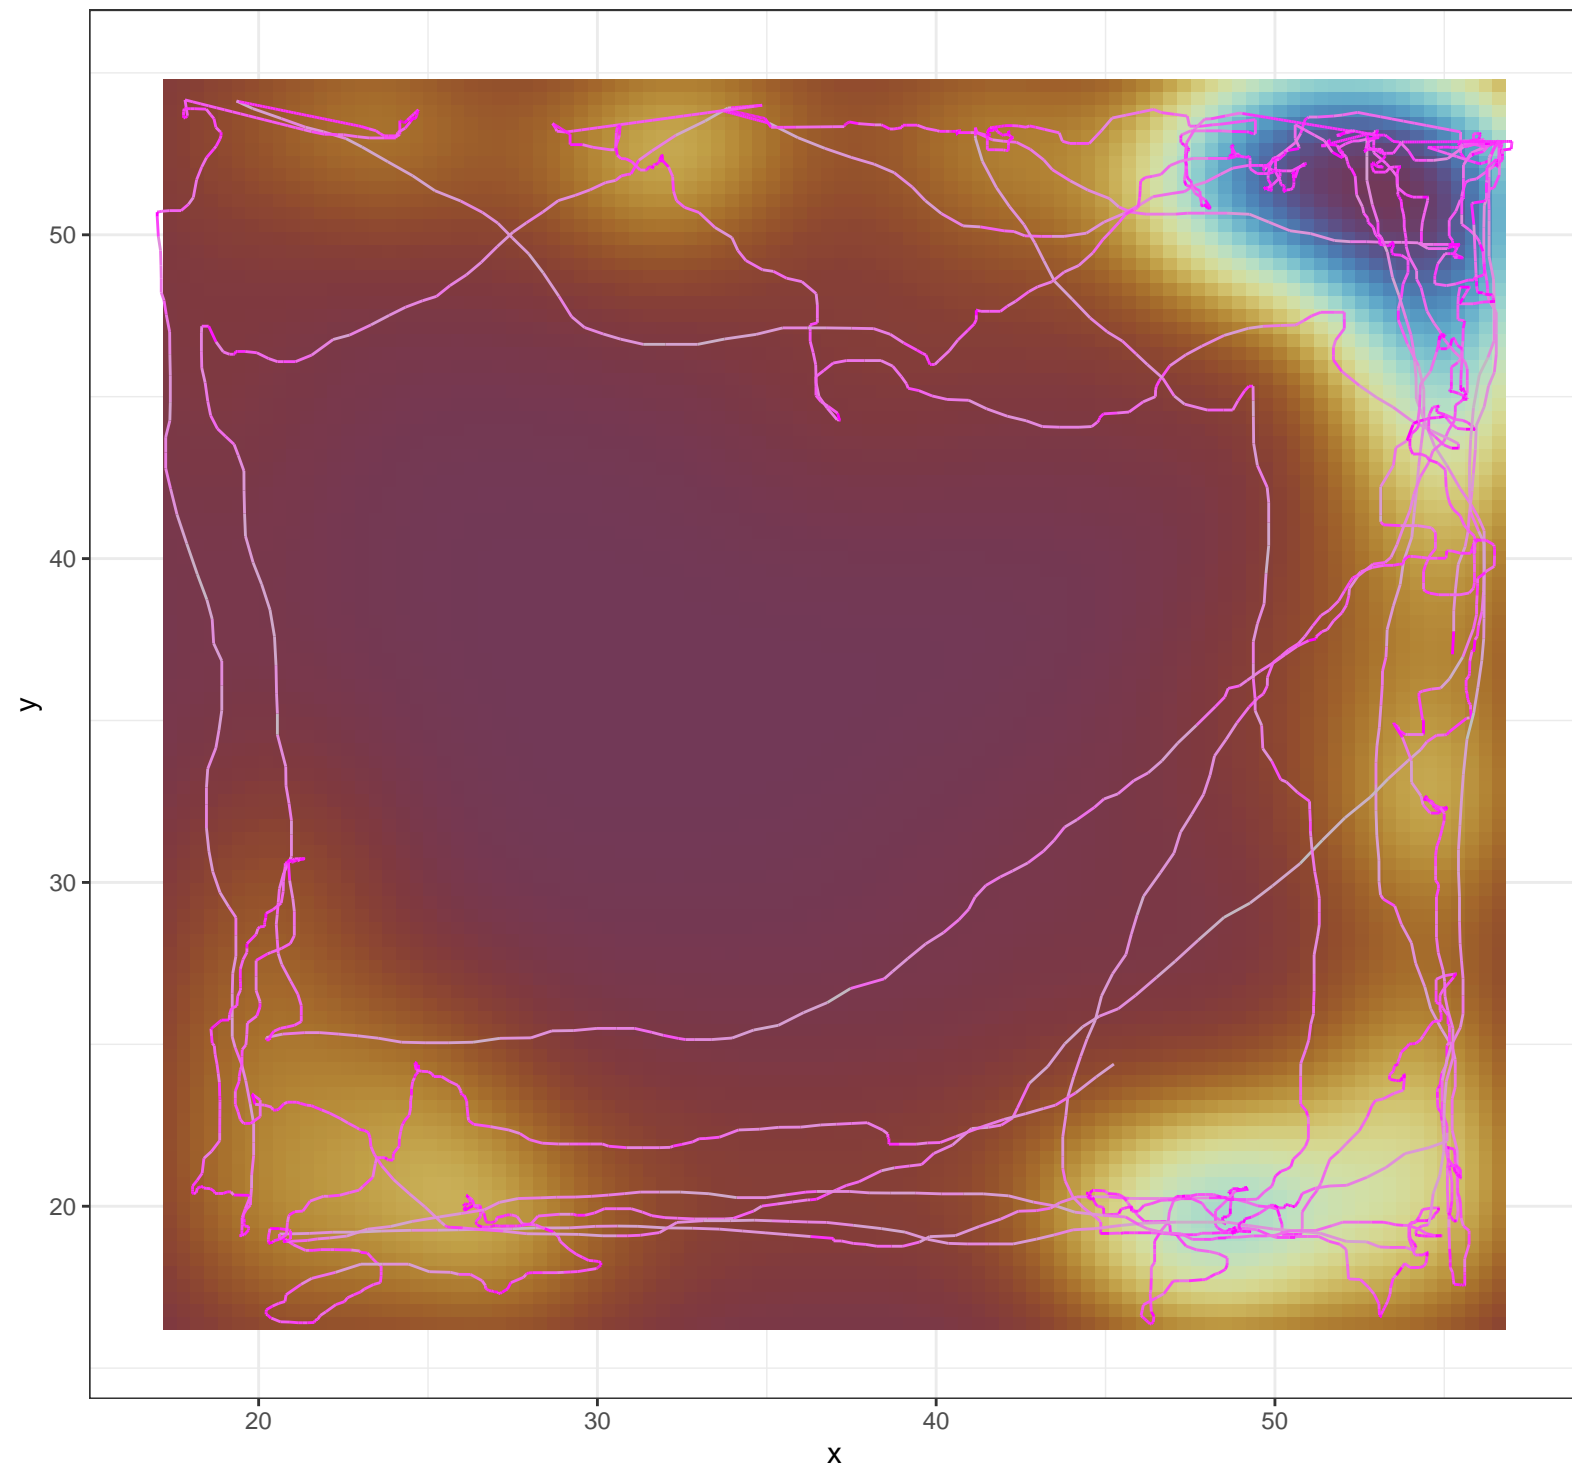

Occiput Maus\_106-21\_10\_MAH01020DLC\_resnet50\_OpenFieldDec23shuffle1\_600000\_filtered.csv

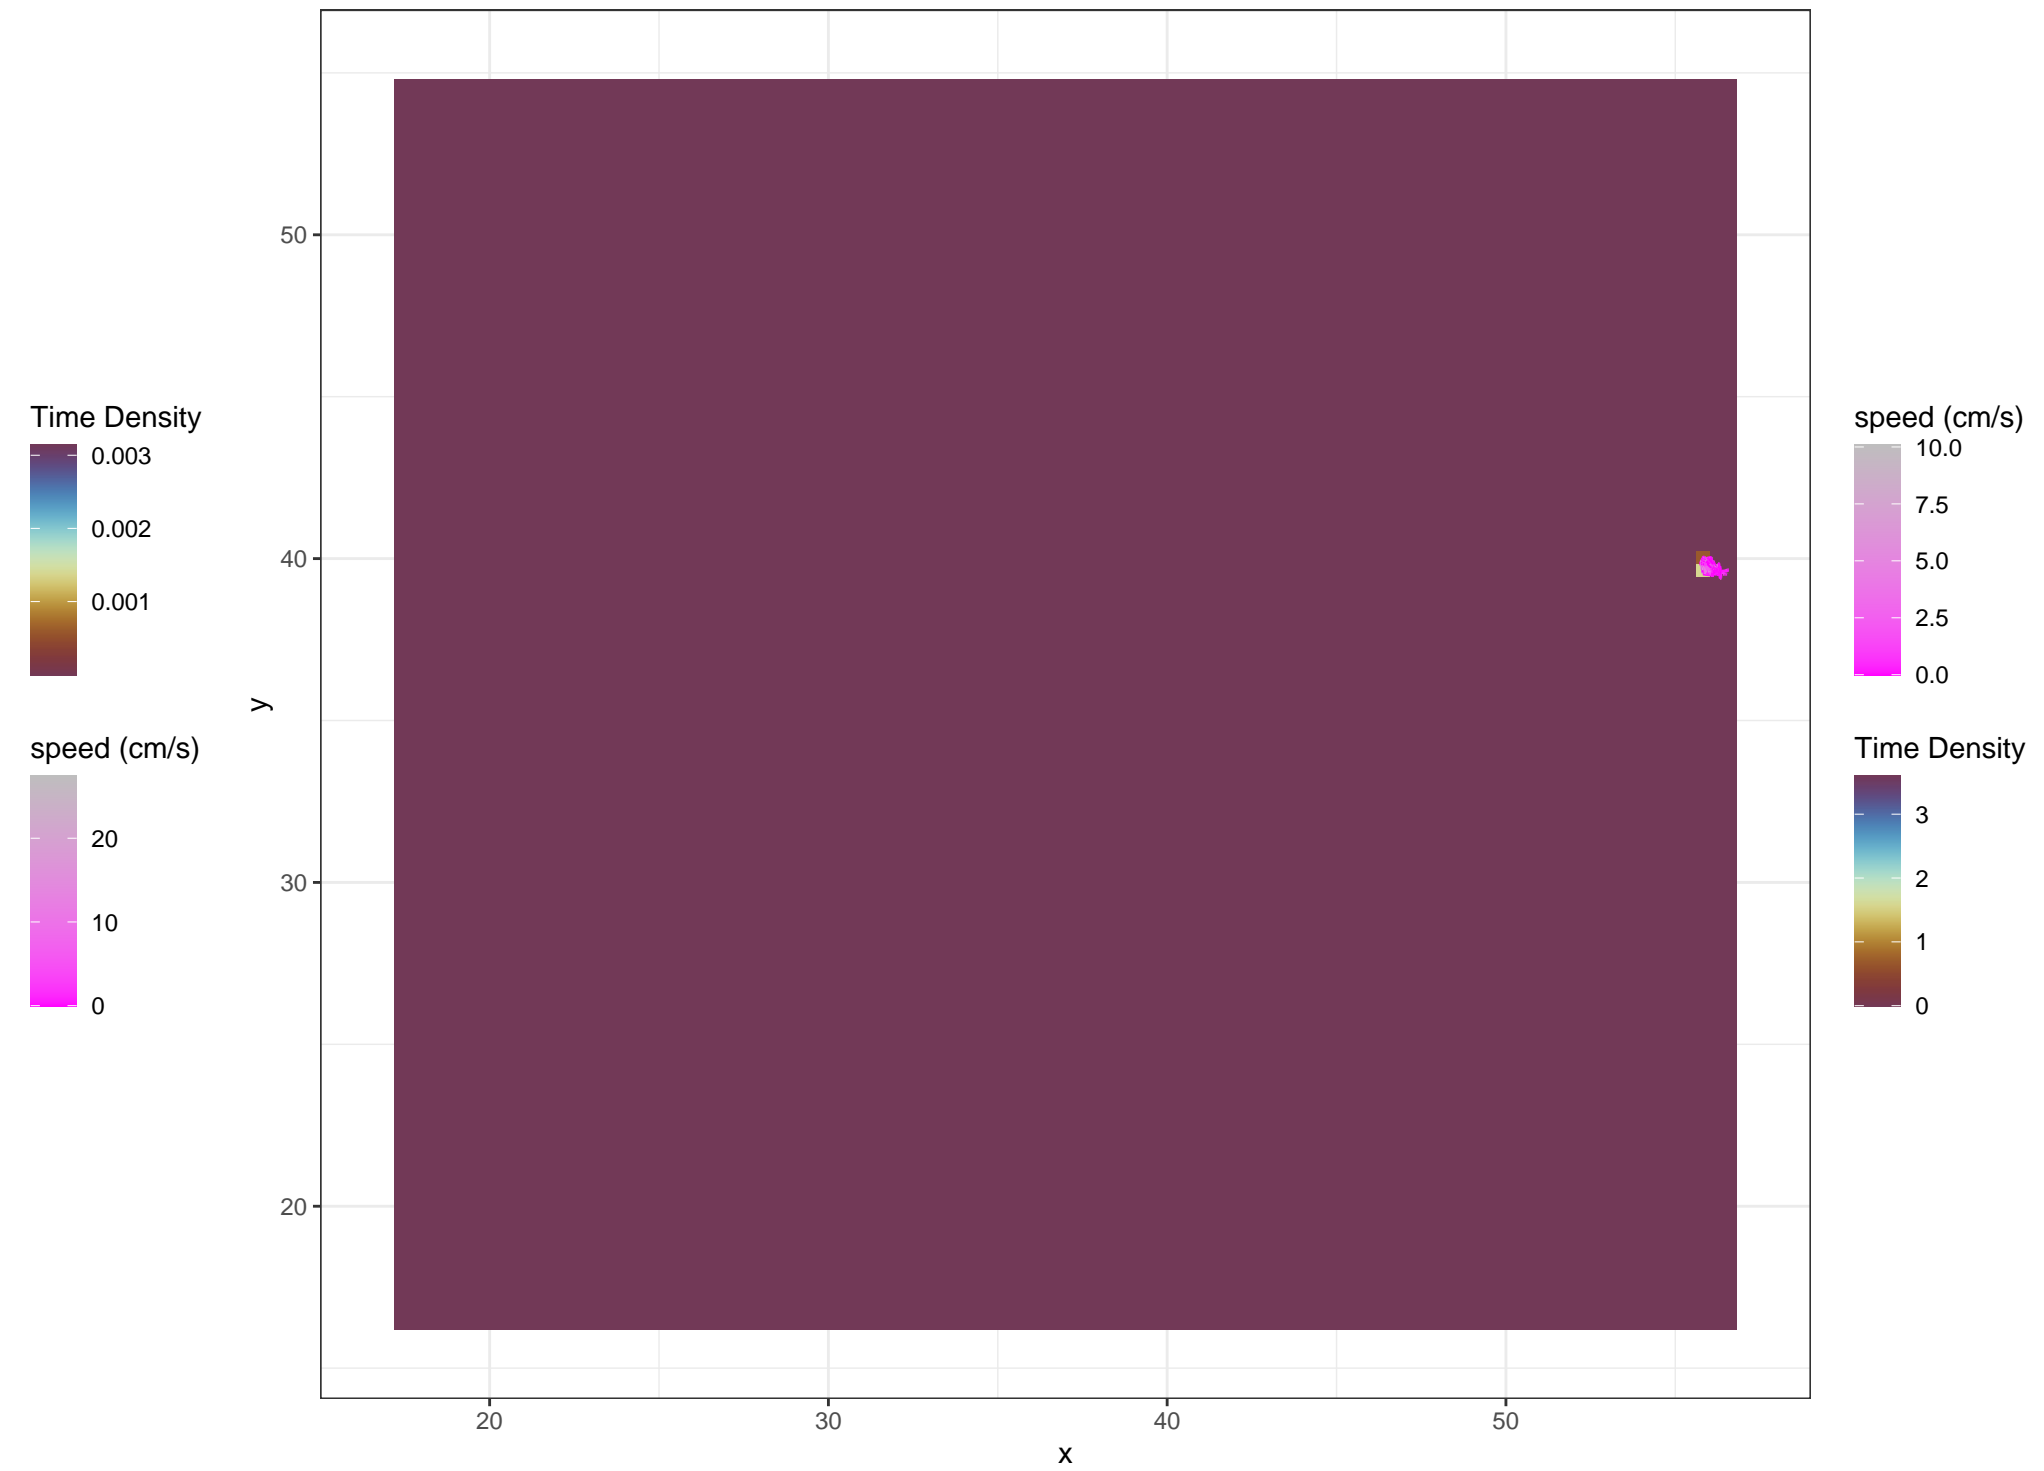

Occiput Maus\_106-21\_A\_MAH01016DLC\_resnet50\_OpenFieldDec23shuffle1\_600000\_filtered.csv

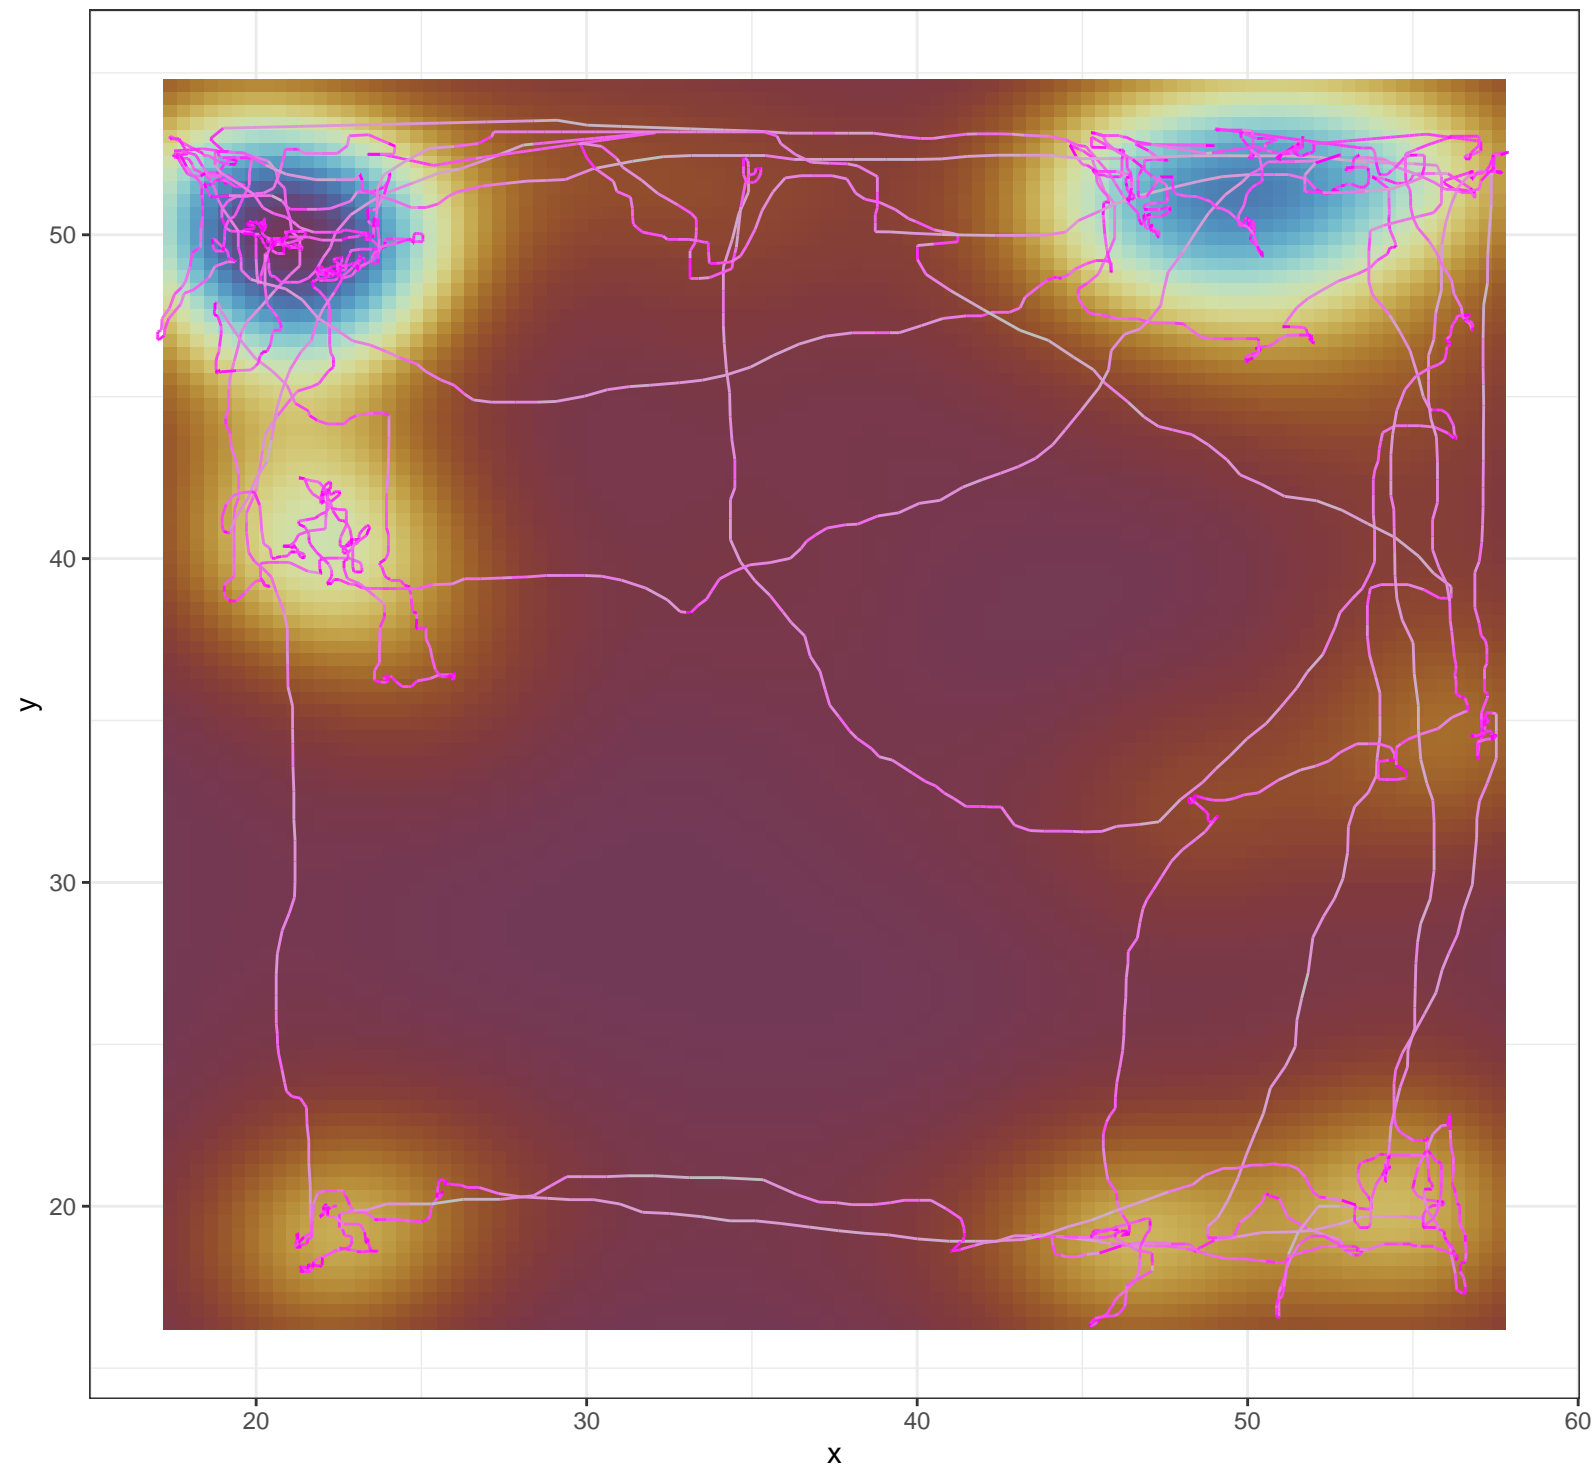

Occiput Maus\_106-21\_A\_MAH01016DLC\_resnet50\_OpenFieldDec23shuffle1\_600000\_filtered.csv

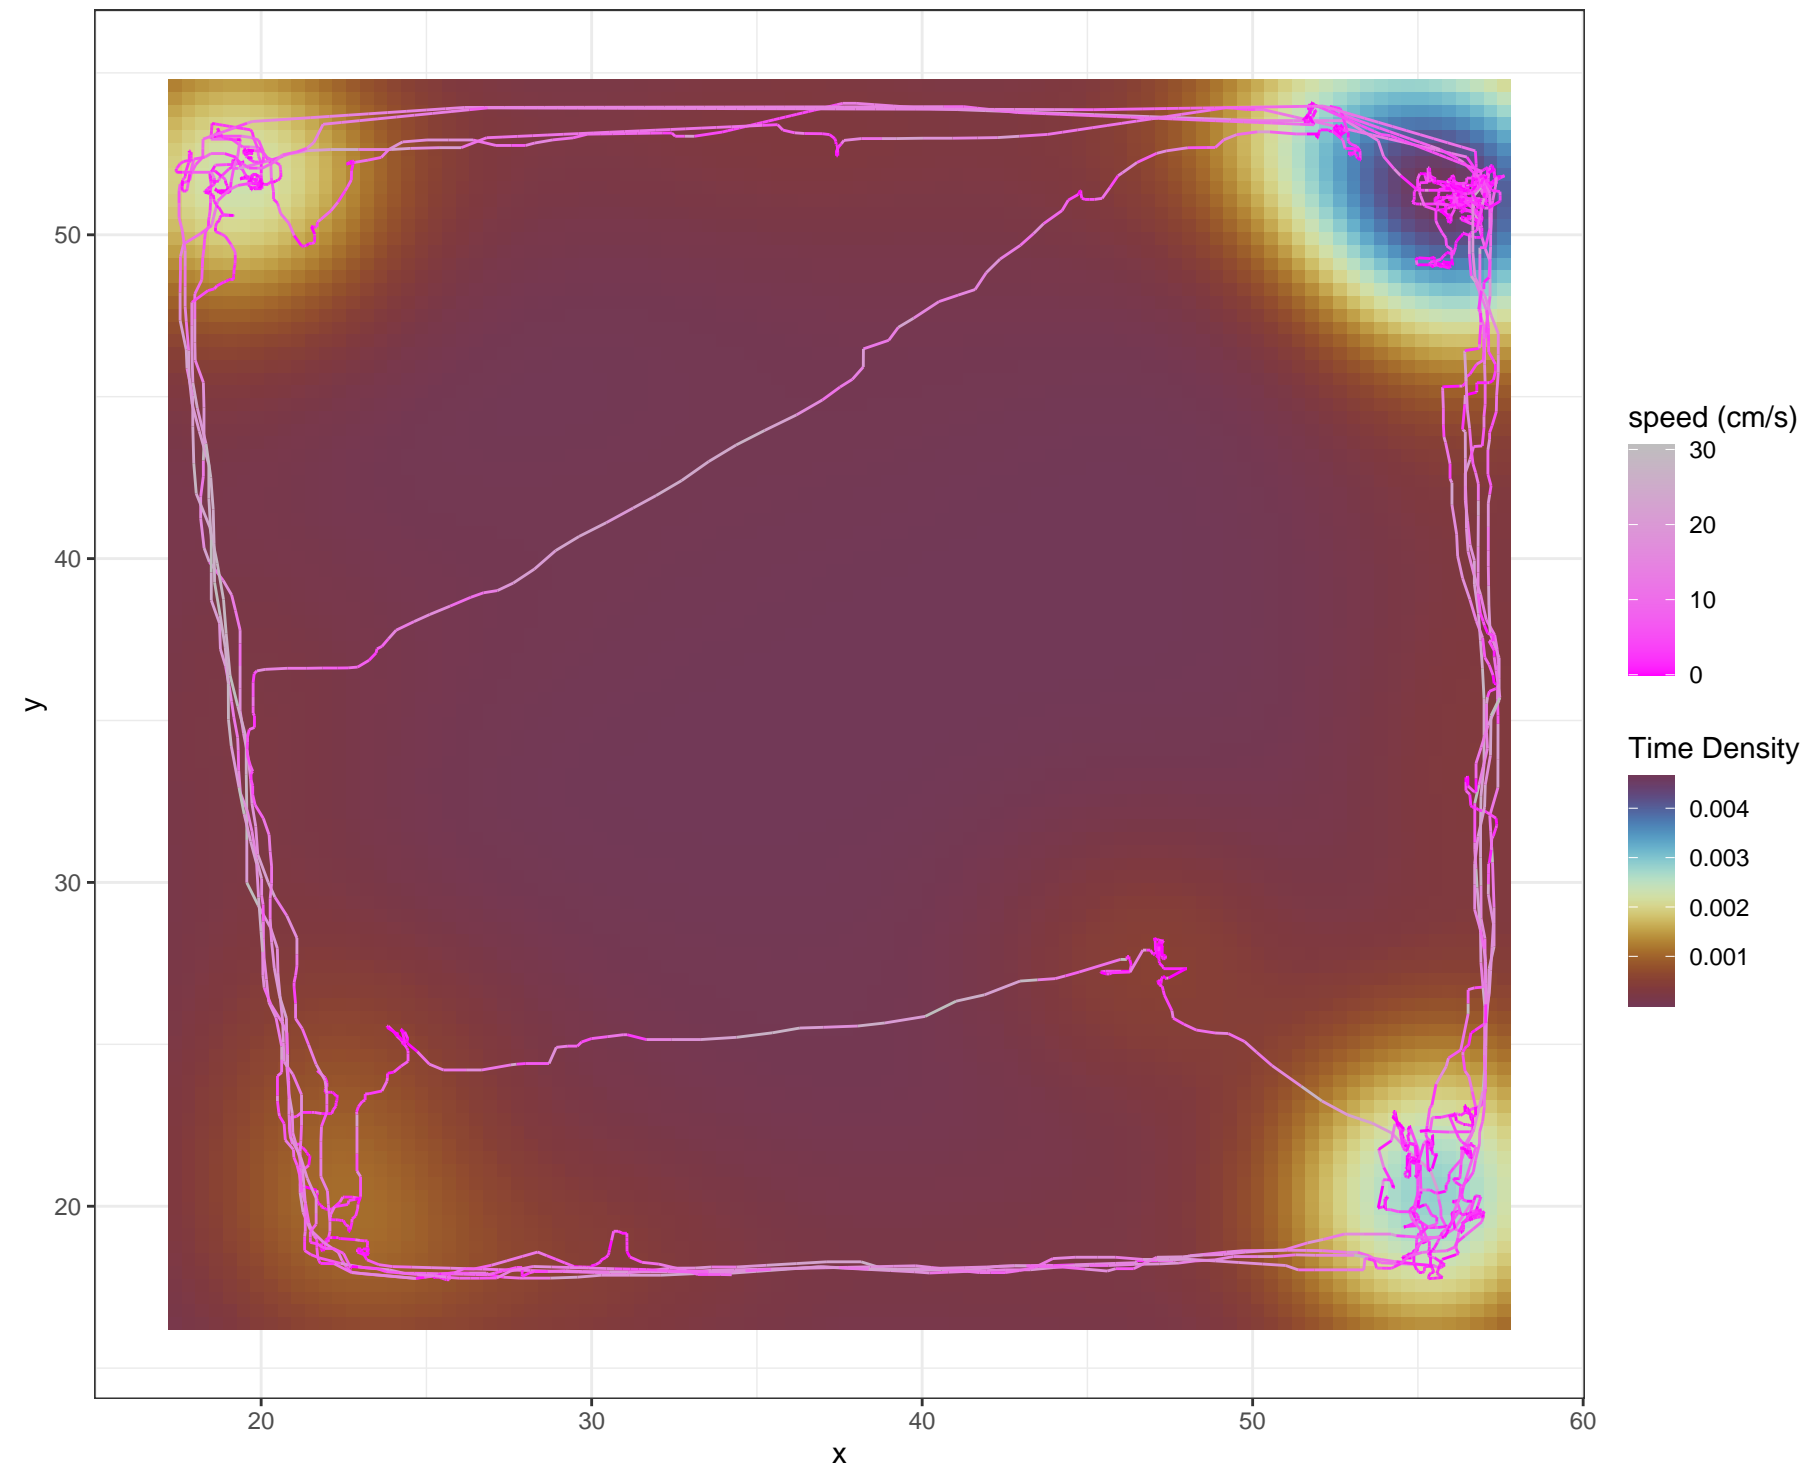

Occiput Maus\_106-21\_B\_MAH01017DLC\_resnet50\_OpenFieldDec23shuffle1\_600000\_filtered.csv

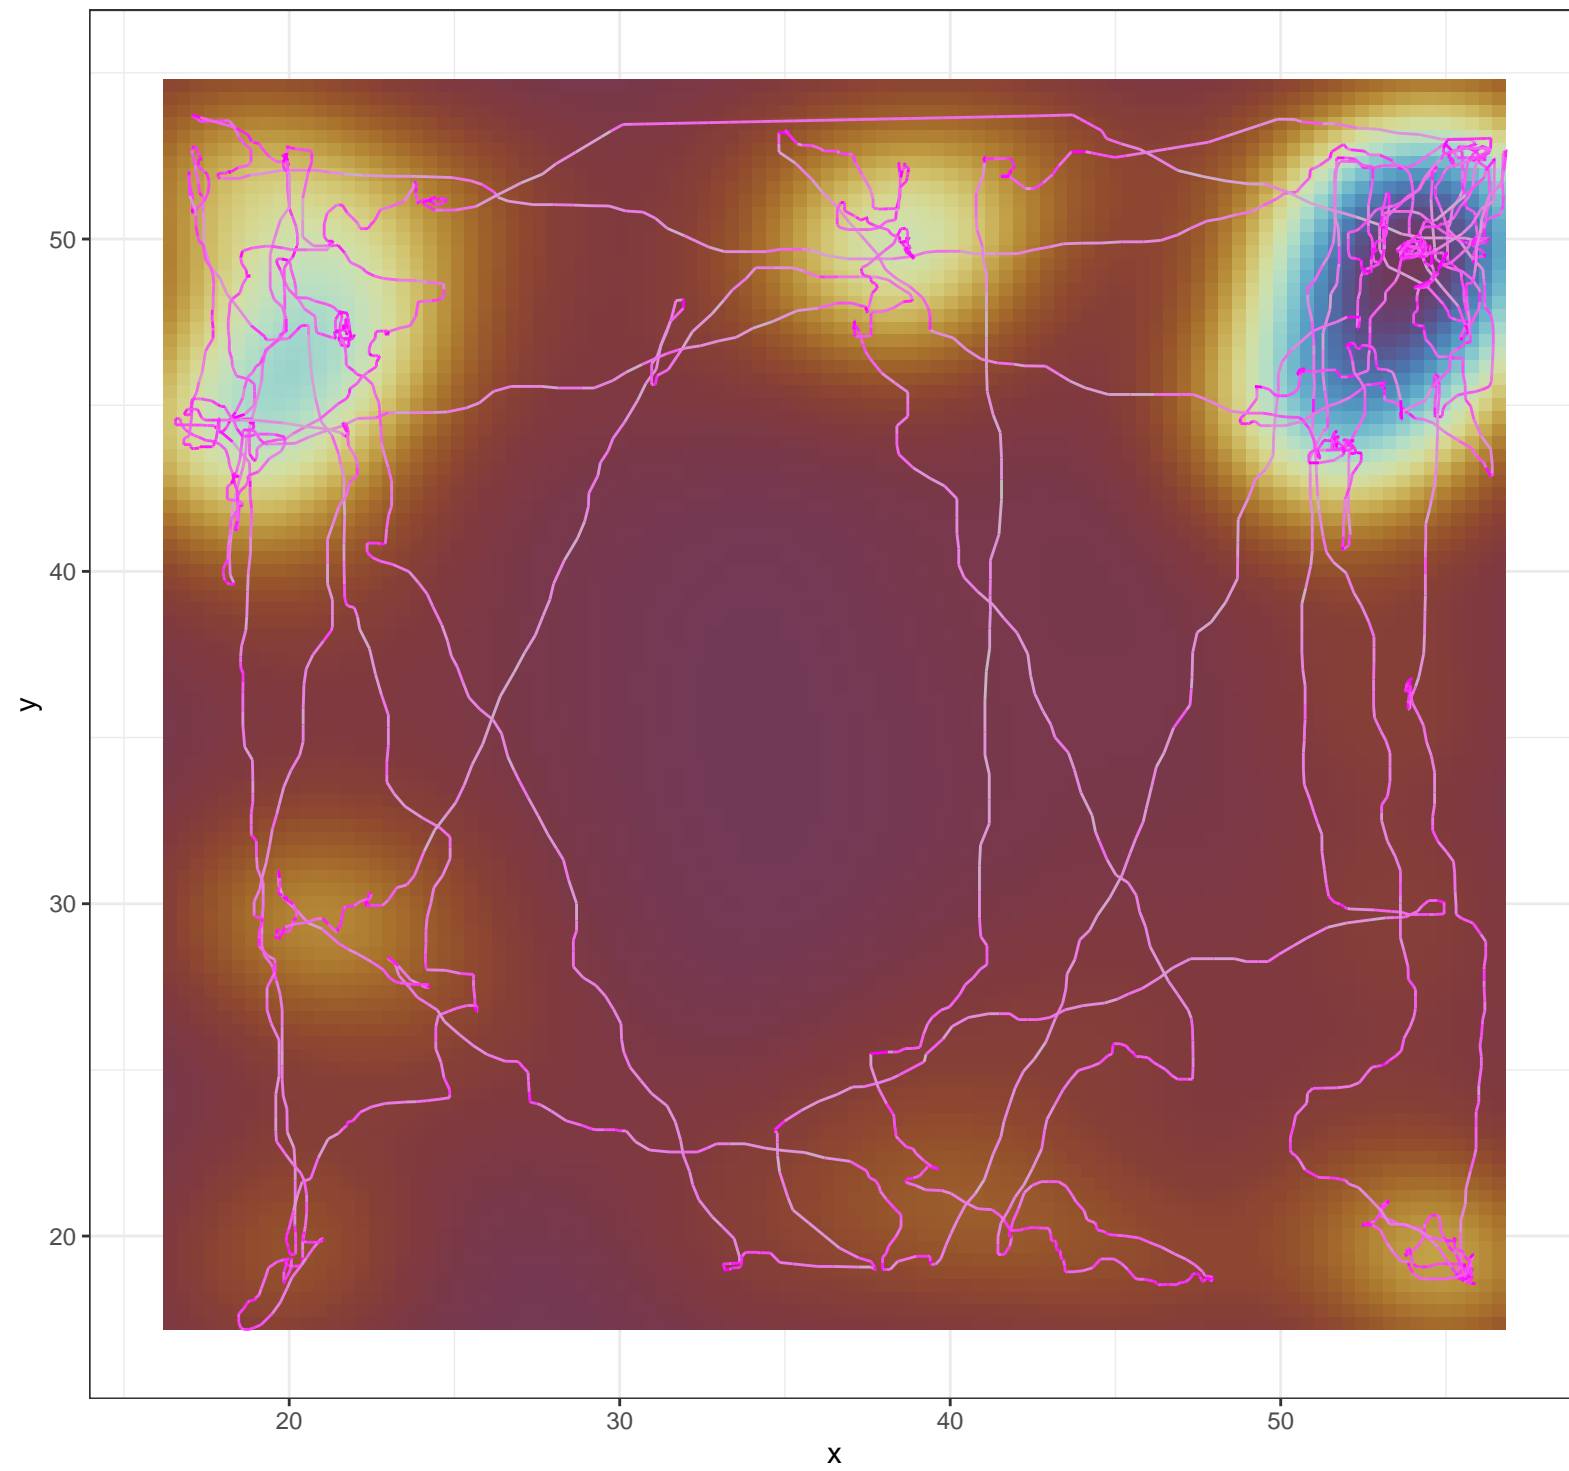

Occiput Maus\_106-21\_B\_MAH01017DLC\_resnet50\_OpenFieldDec23shuffle1\_600000\_filtered.csv

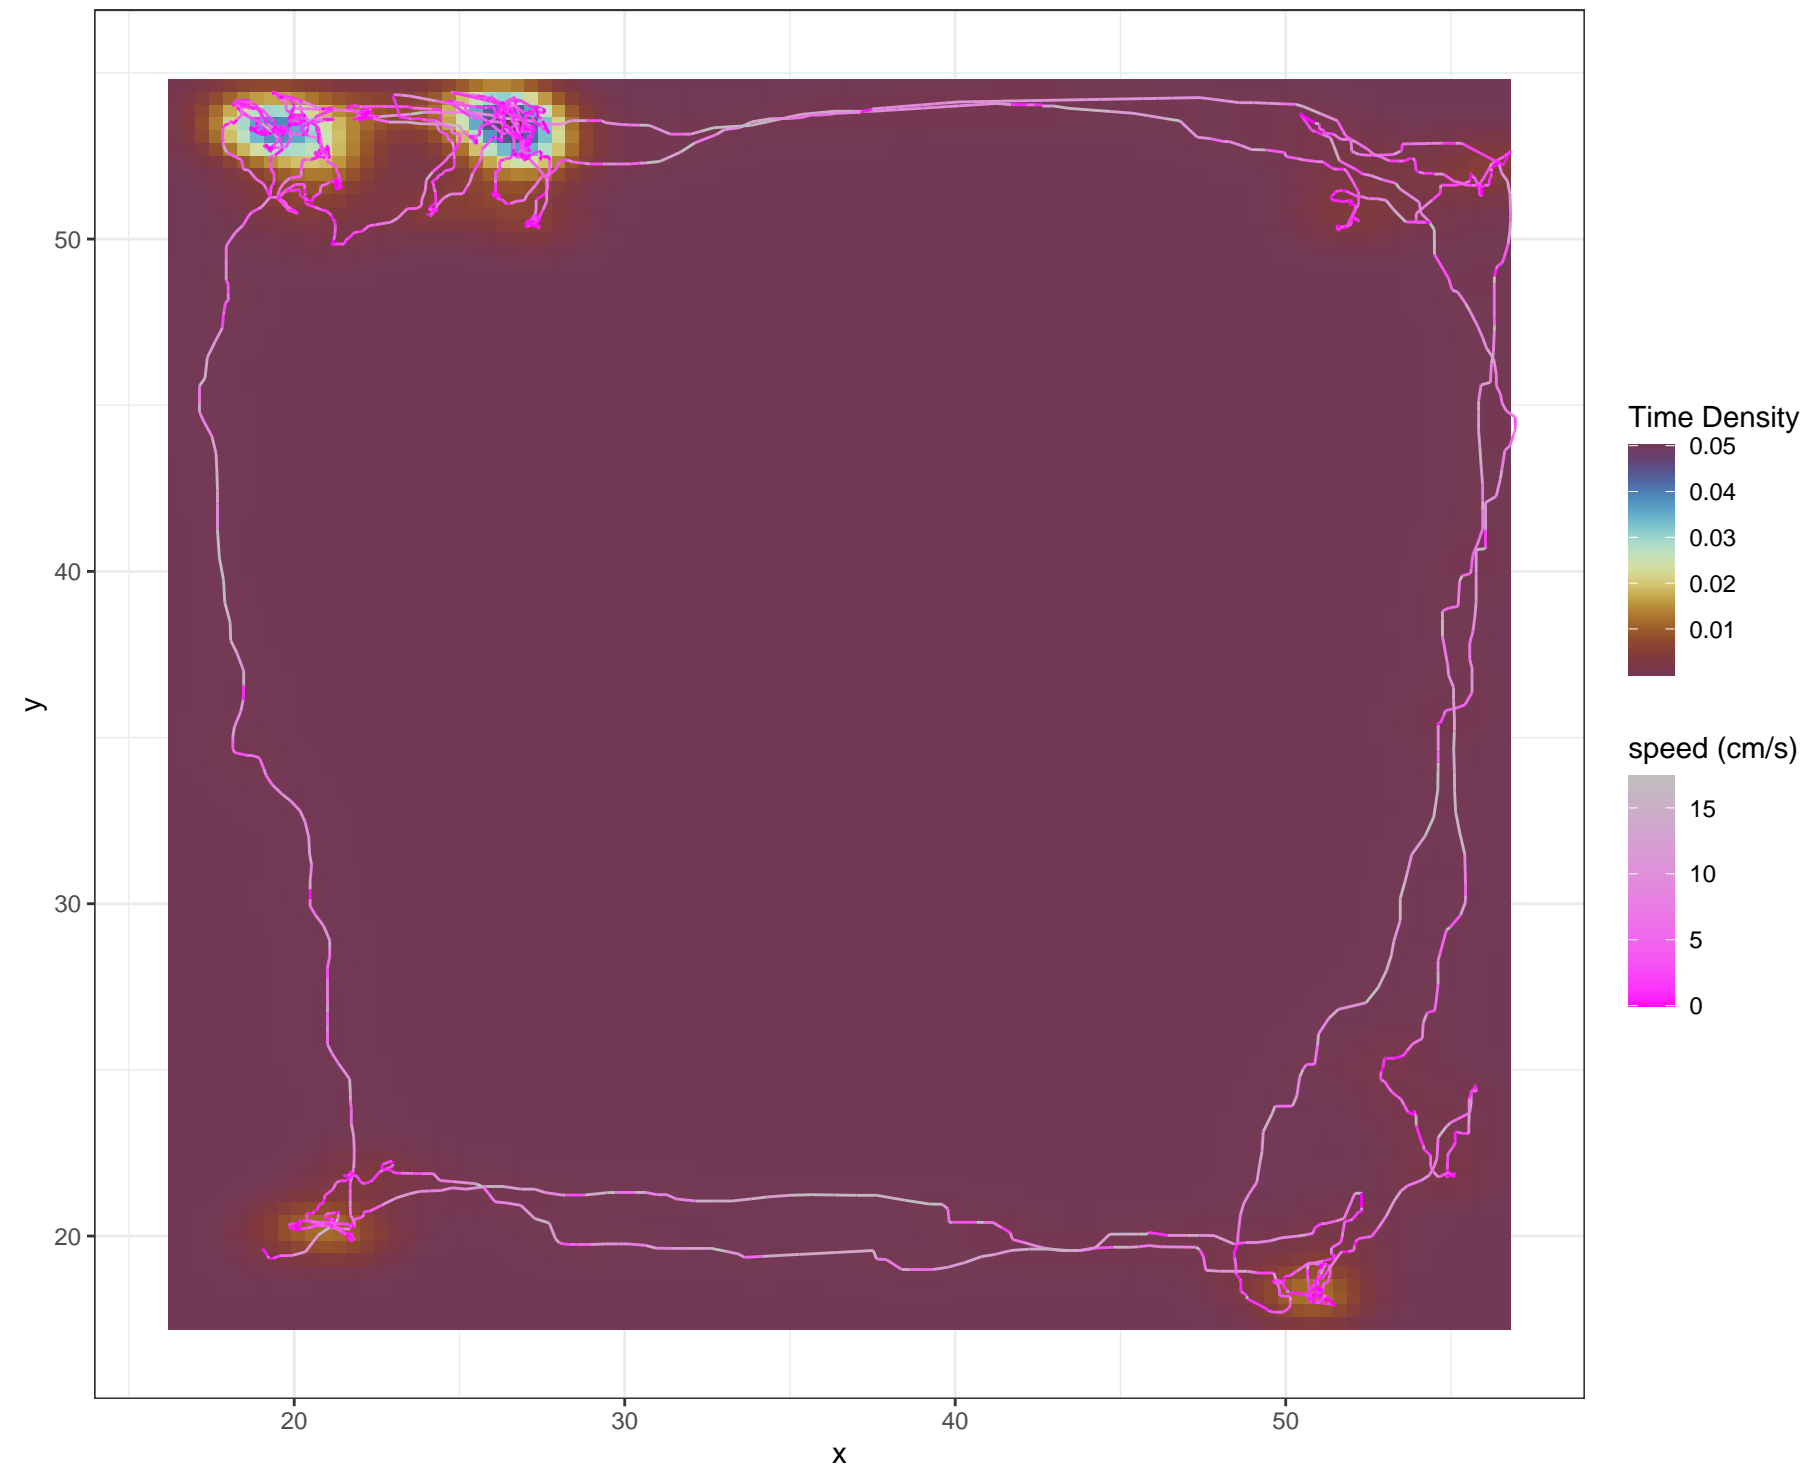

Occiput Maus\_106-21\_C\_MAH01018DLC\_resnet50\_OpenFieldDec23shuffle1\_600000\_filtered.csv

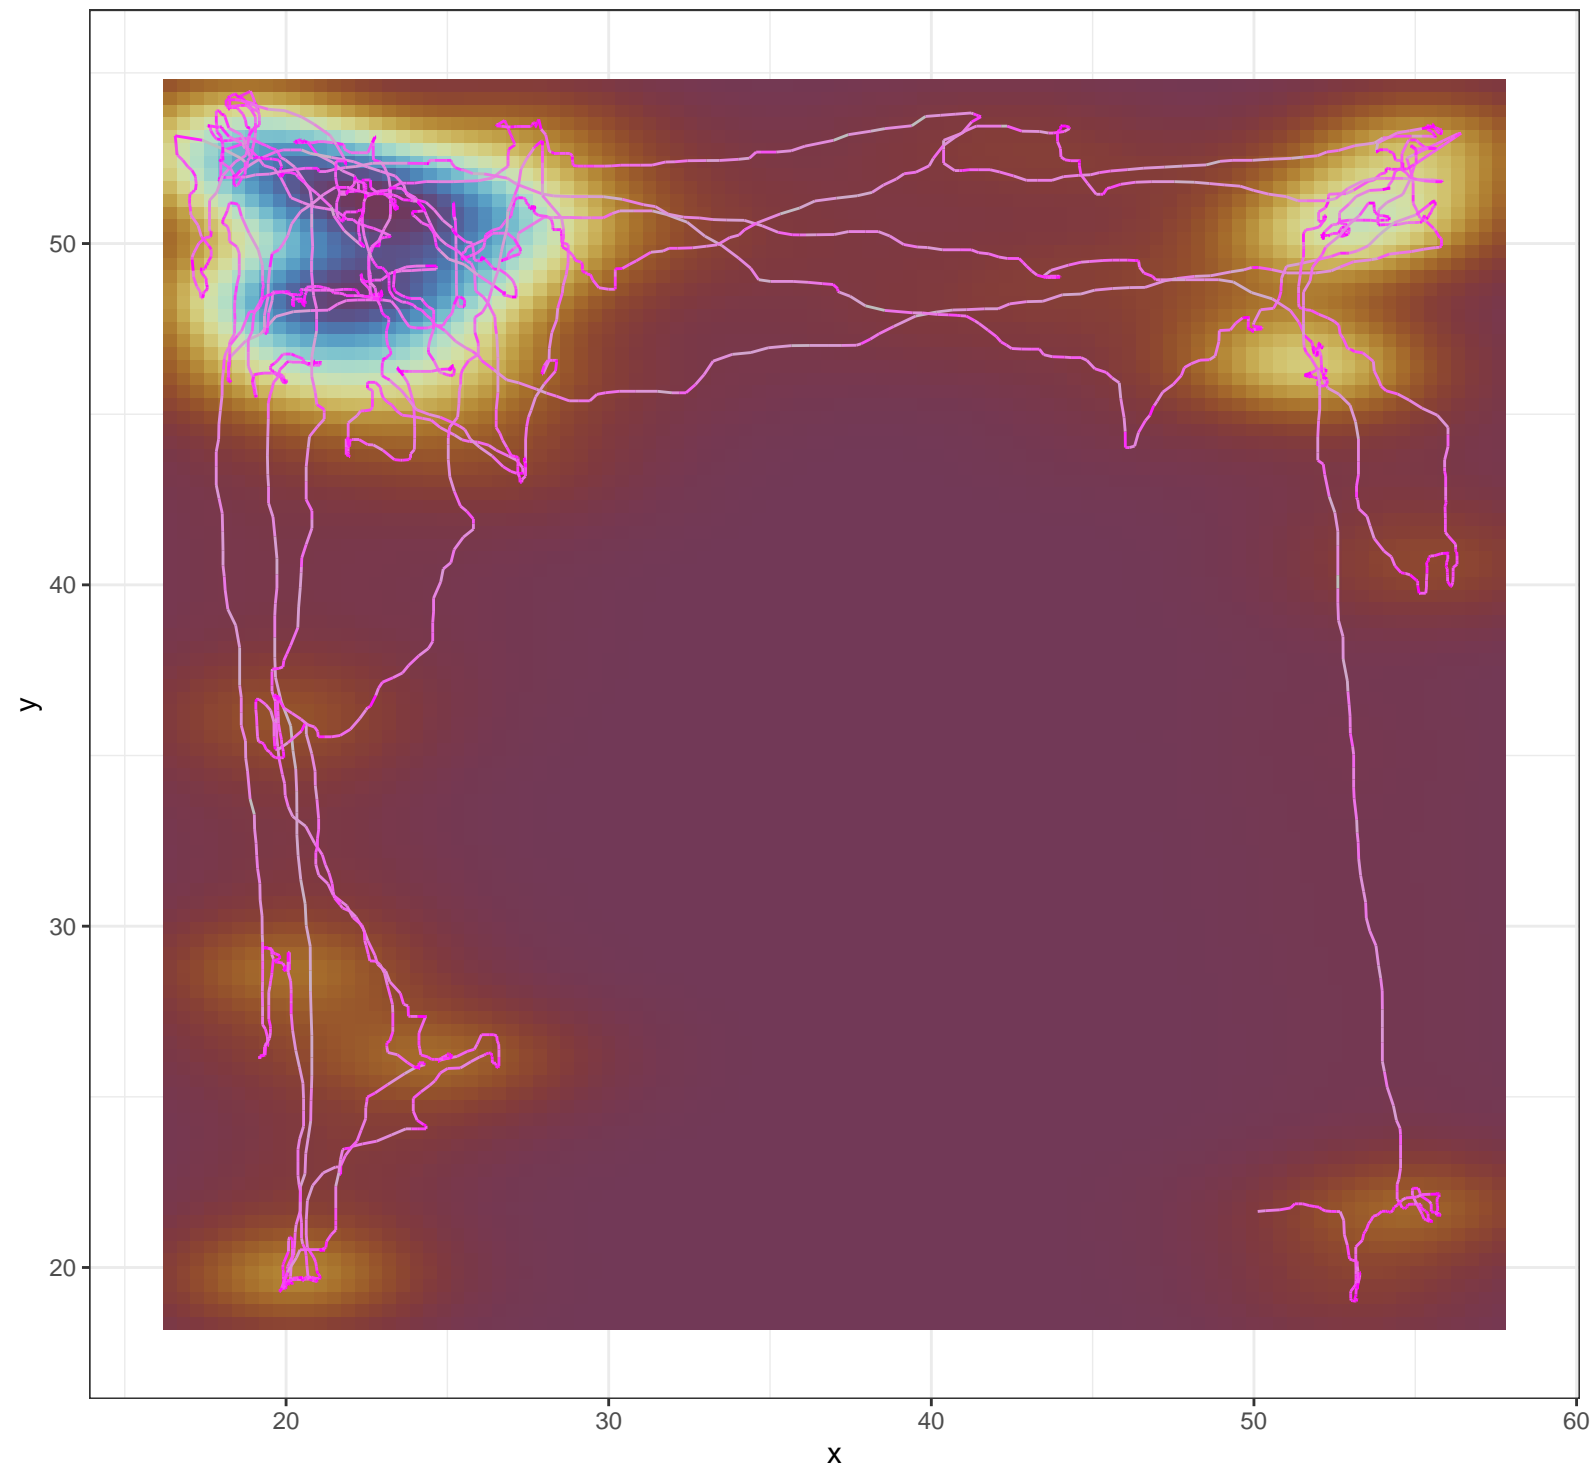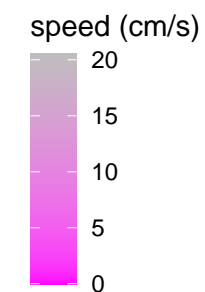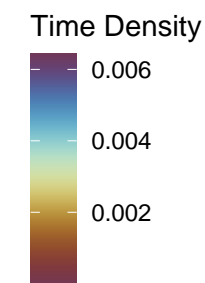

Occiput Maus\_106-21\_C\_MAH01018DLC\_resnet50\_OpenFieldDec23shuffle1\_600000\_filtered.csv

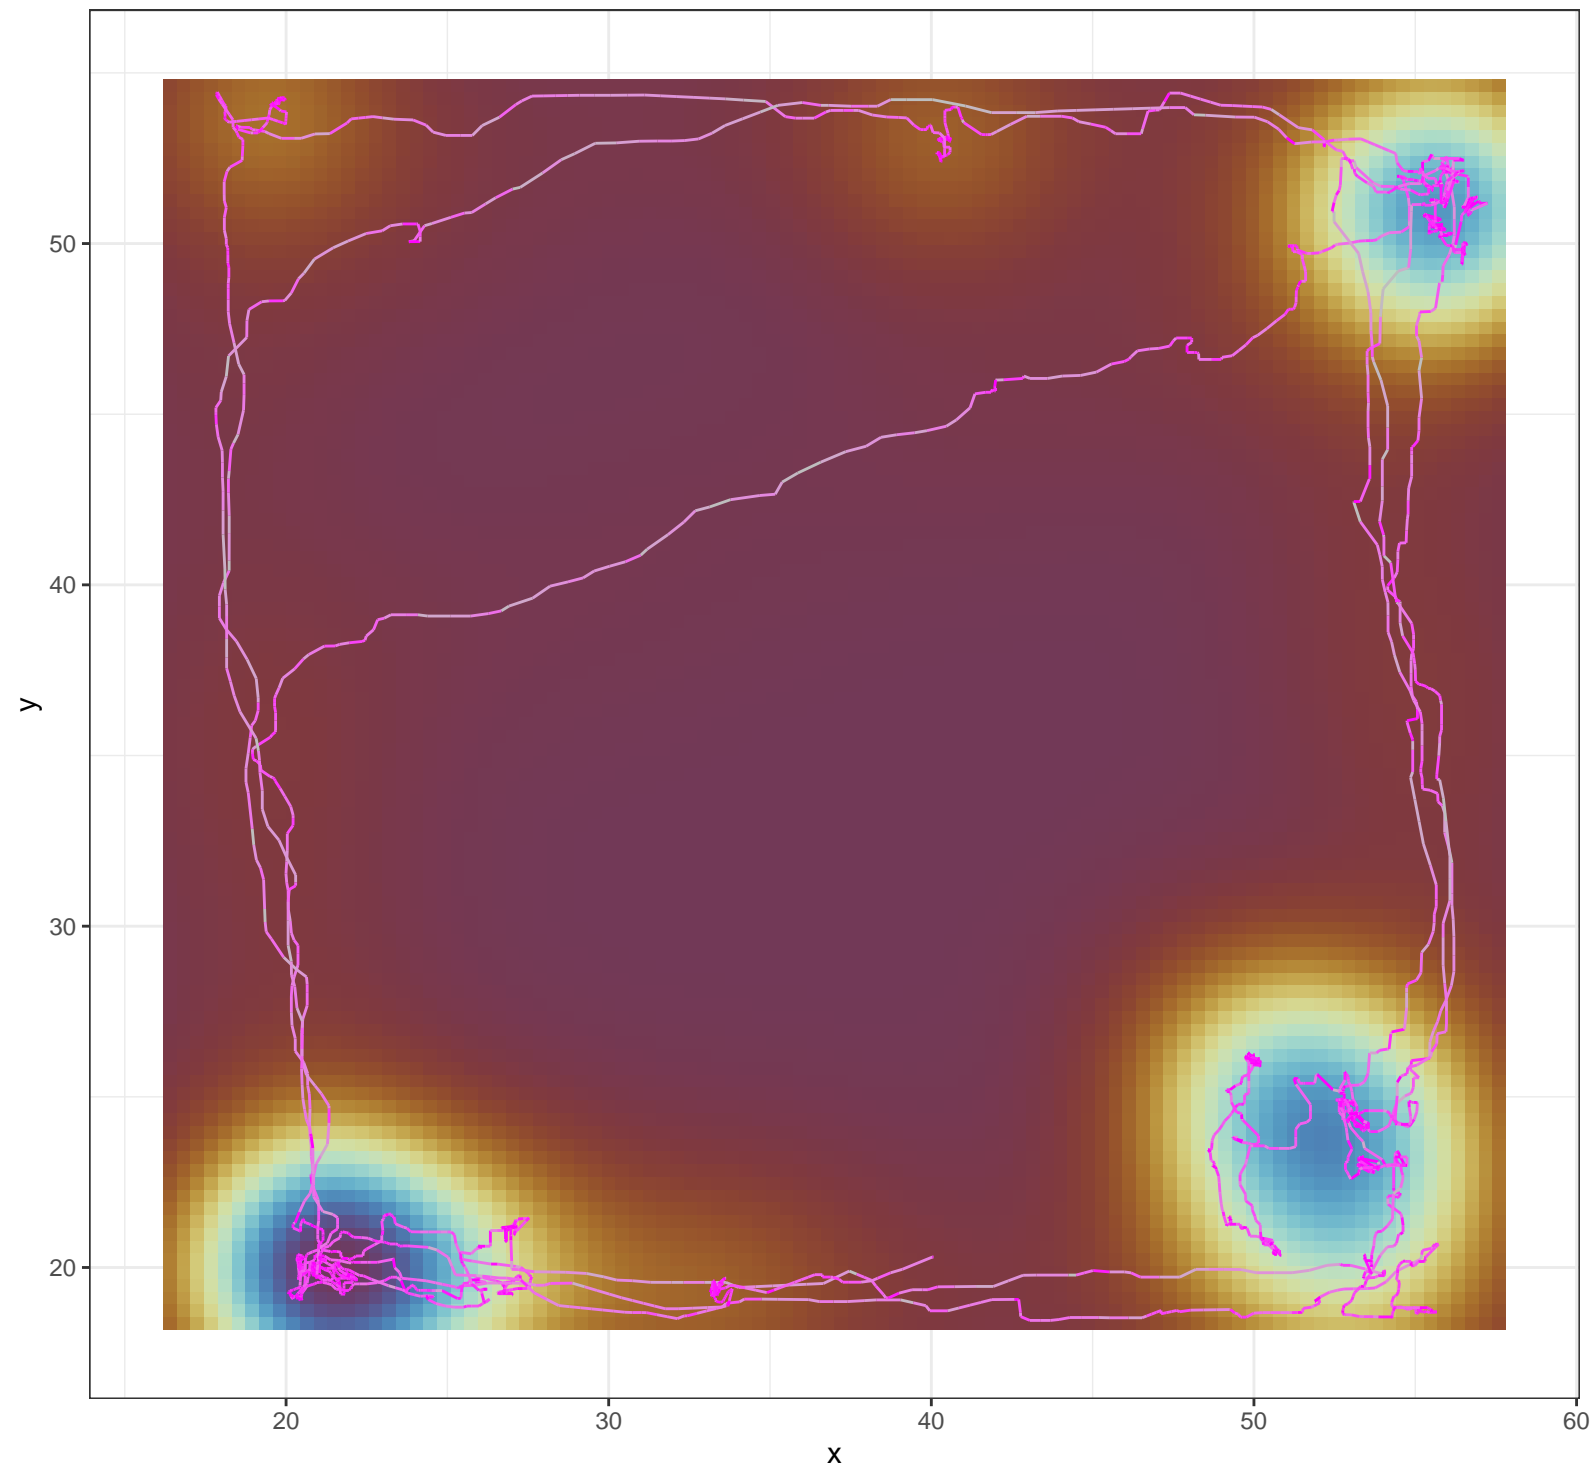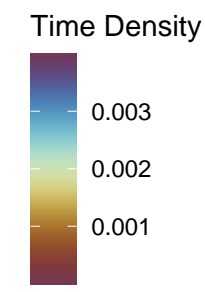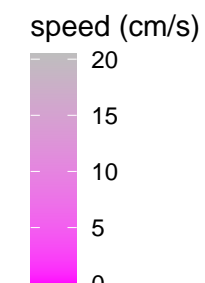

Occiput Maus\_106-21\_D\_MAH01019DLC\_resnet50\_OpenFieldDec23shuffle1\_600000\_filtered.csv

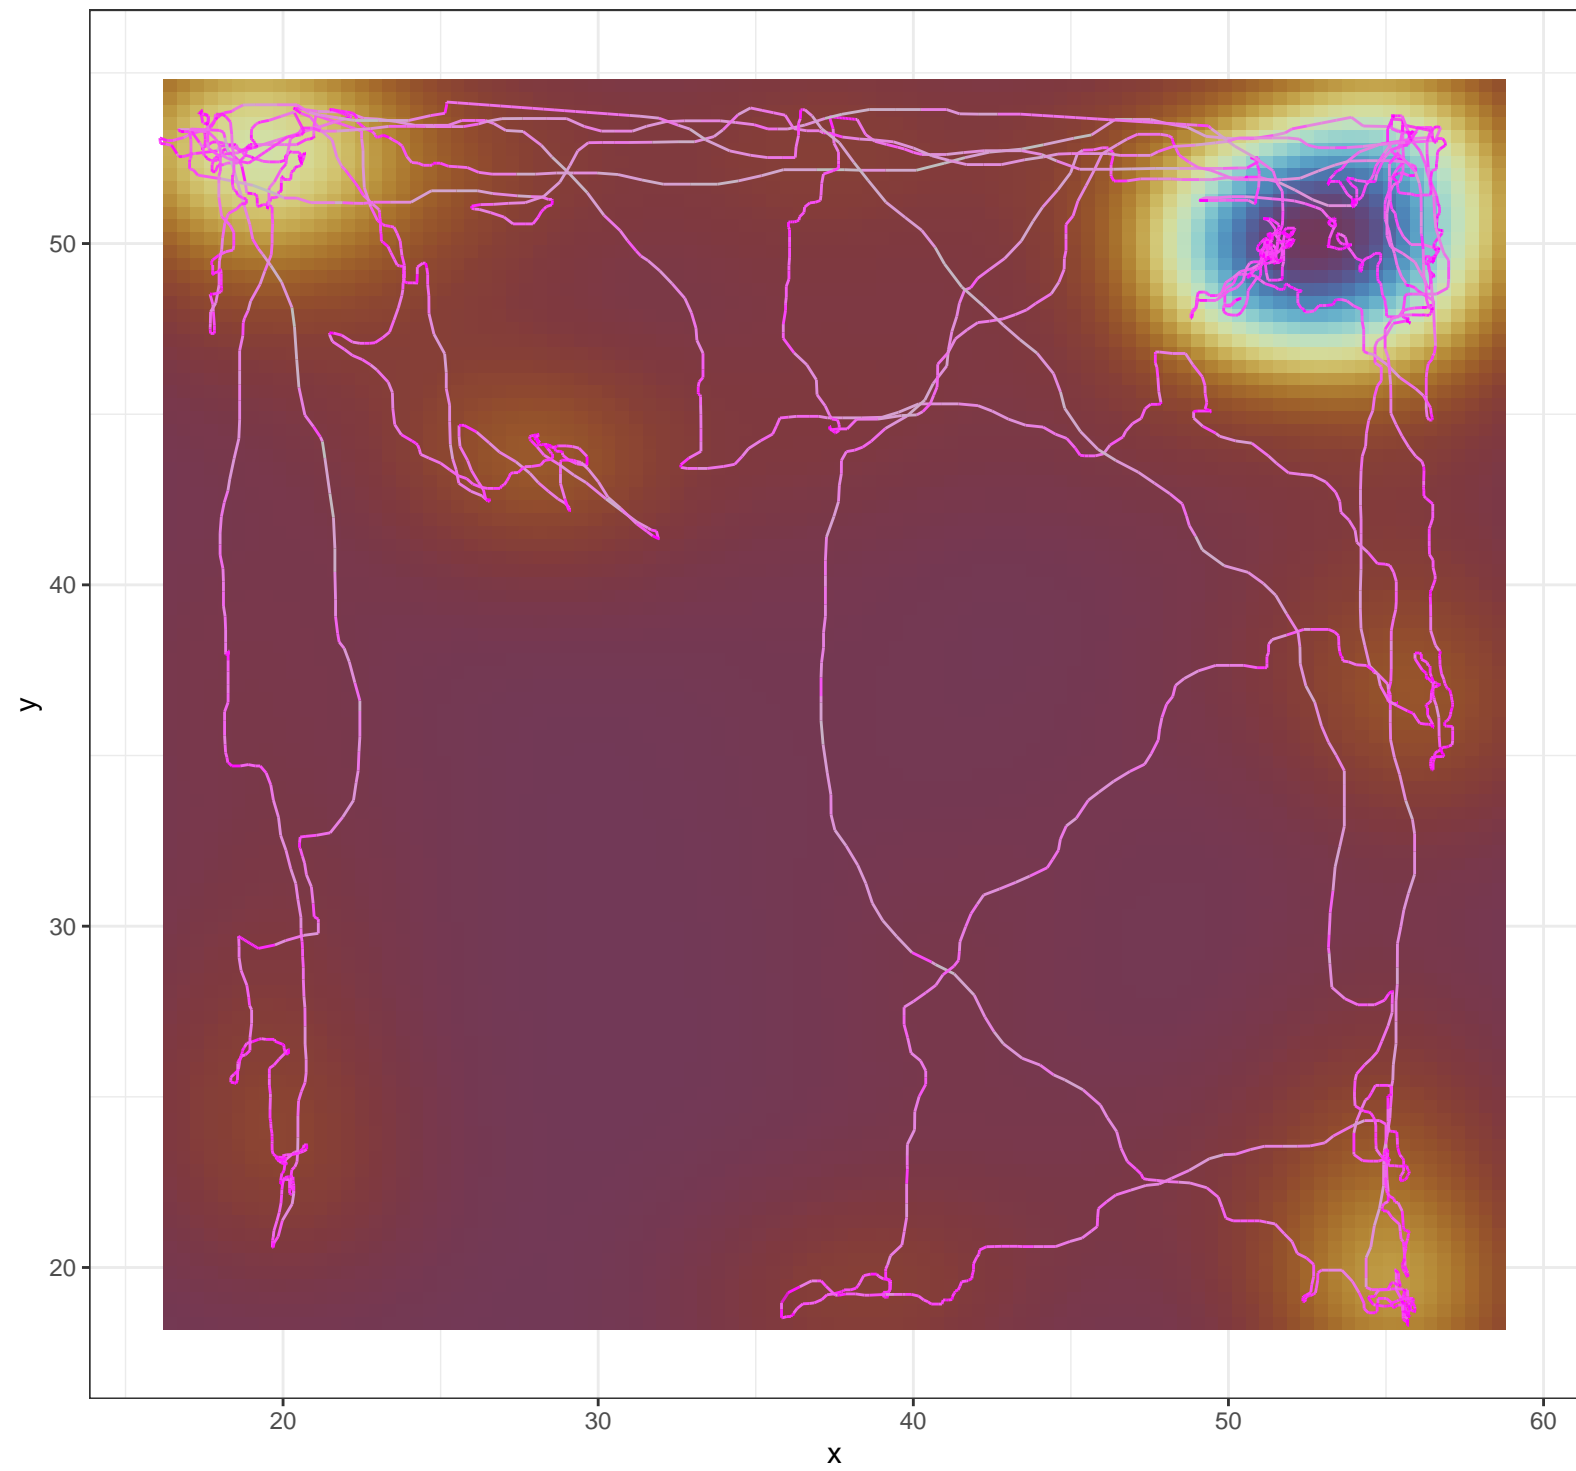

Occiput Maus\_106-21\_D\_MAH01019DLC\_resnet50\_OpenFieldDec23shuffle1\_600000\_filtered.csv

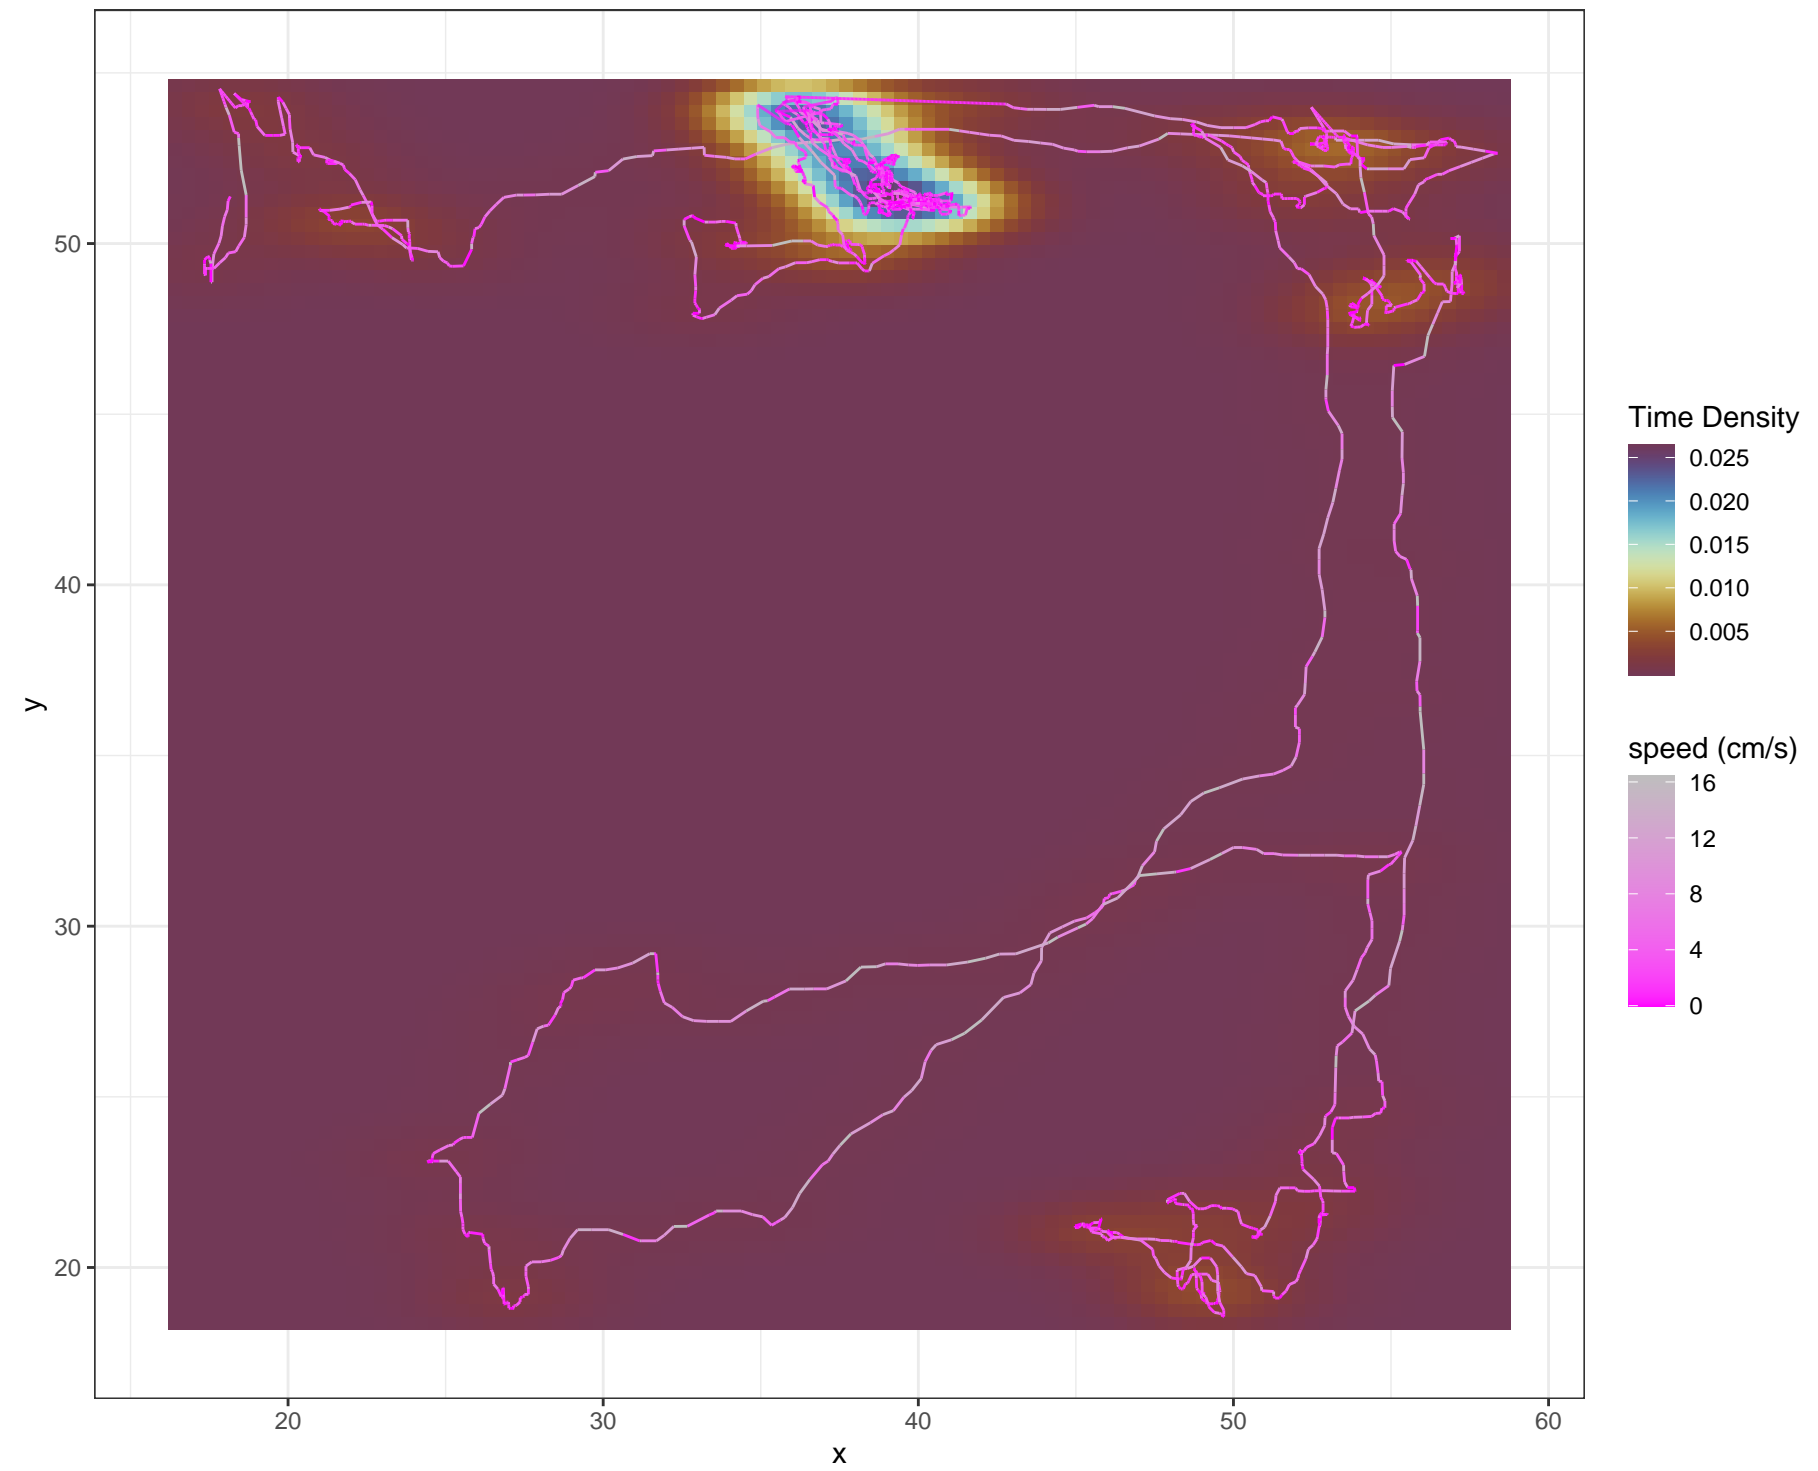

Occiput Maus\_34-21\_10\_MAH00866DLC\_resnet50\_OpenFieldDec23shuffle1\_600000\_filtered.csv

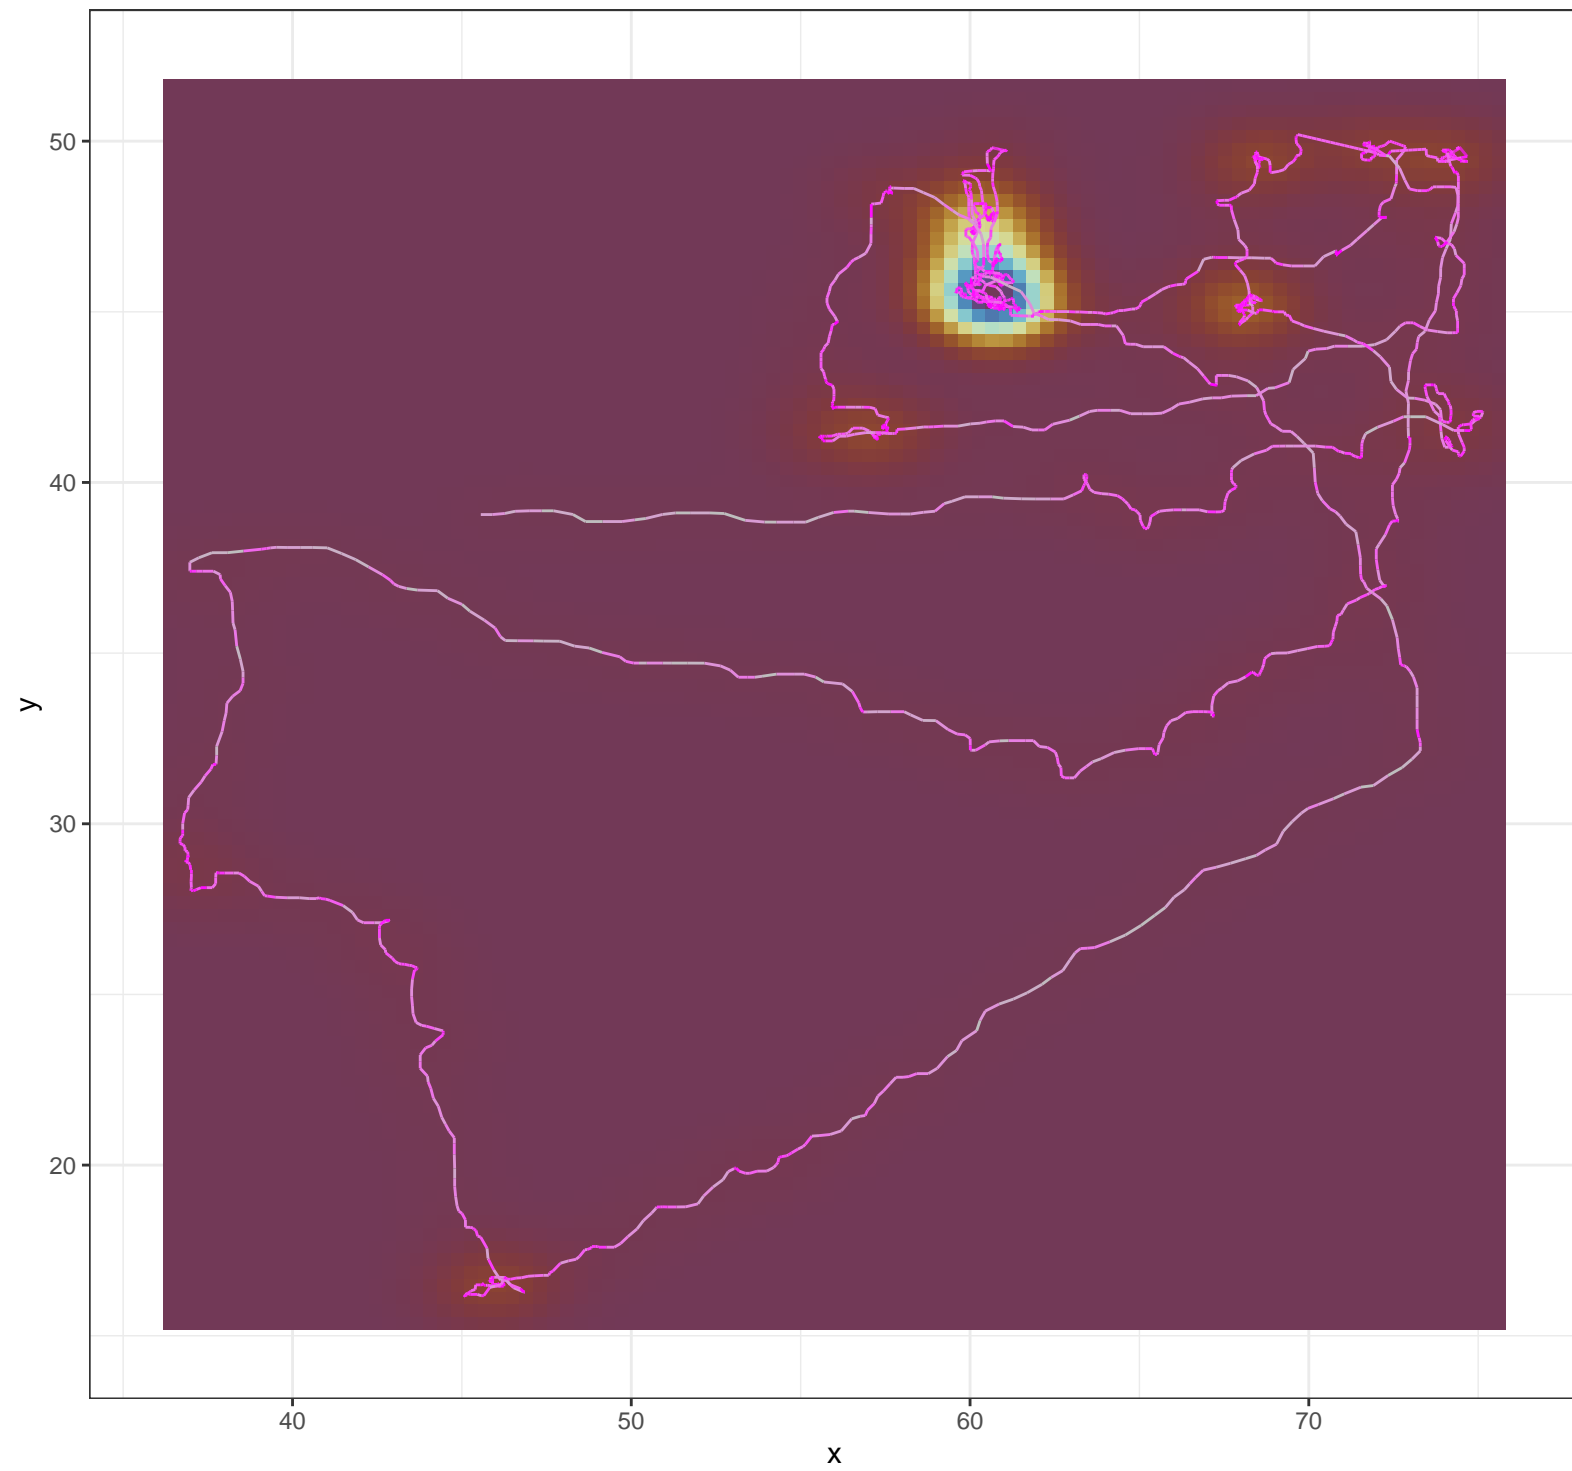

Occiput Maus\_34-21\_10\_MAH00866DLC\_resnet50\_OpenFieldDec23shuffle1\_600000\_filtered.csv

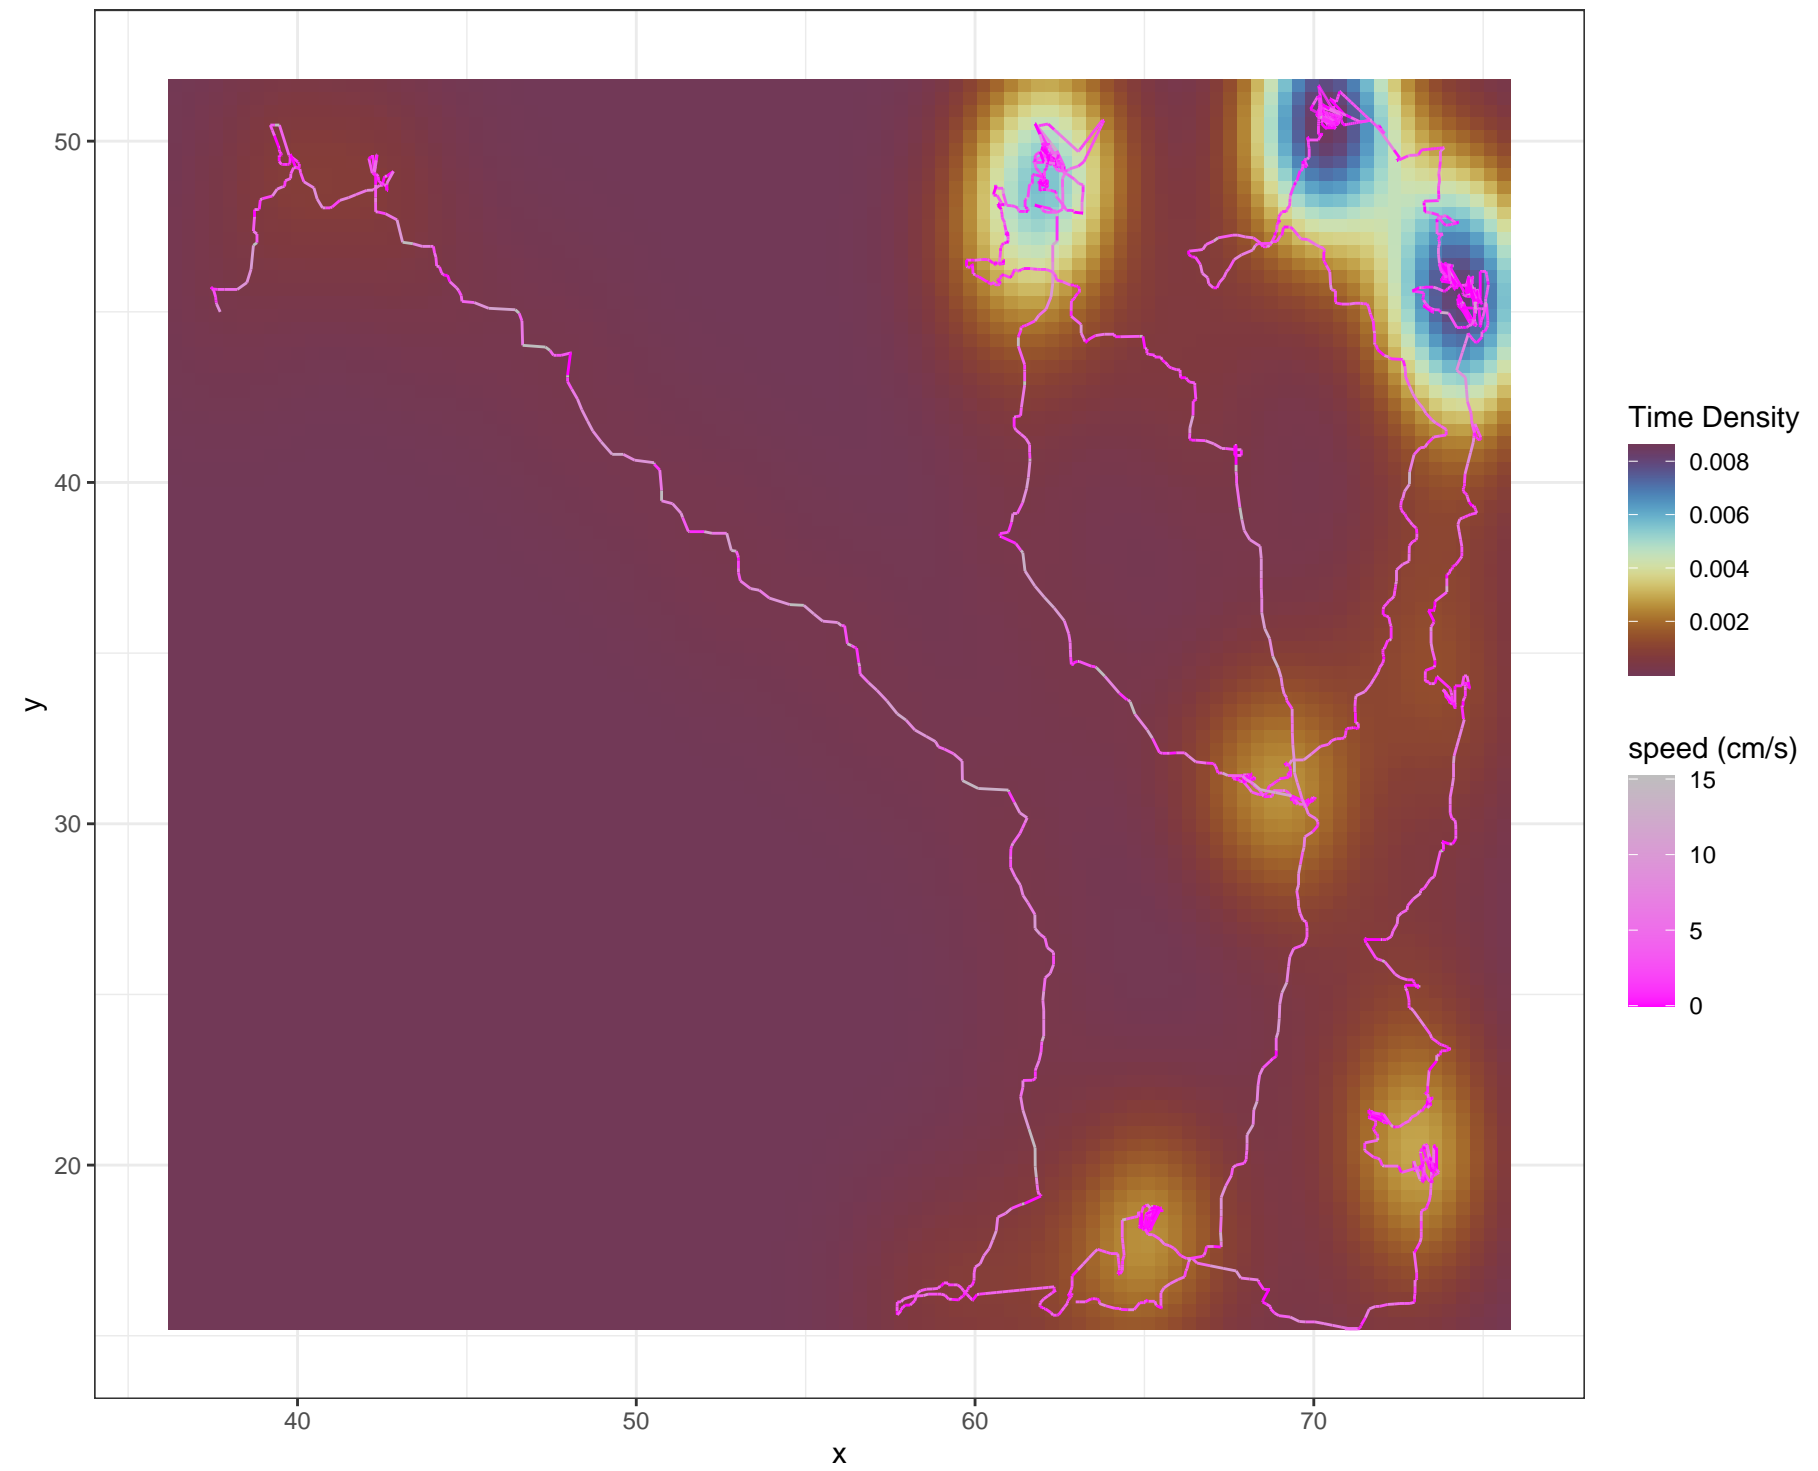

Occiput Maus\_34-21\_11\_MAH00863DLC\_resnet50\_OpenFieldDec23shuffle1\_600000\_filtered.csv

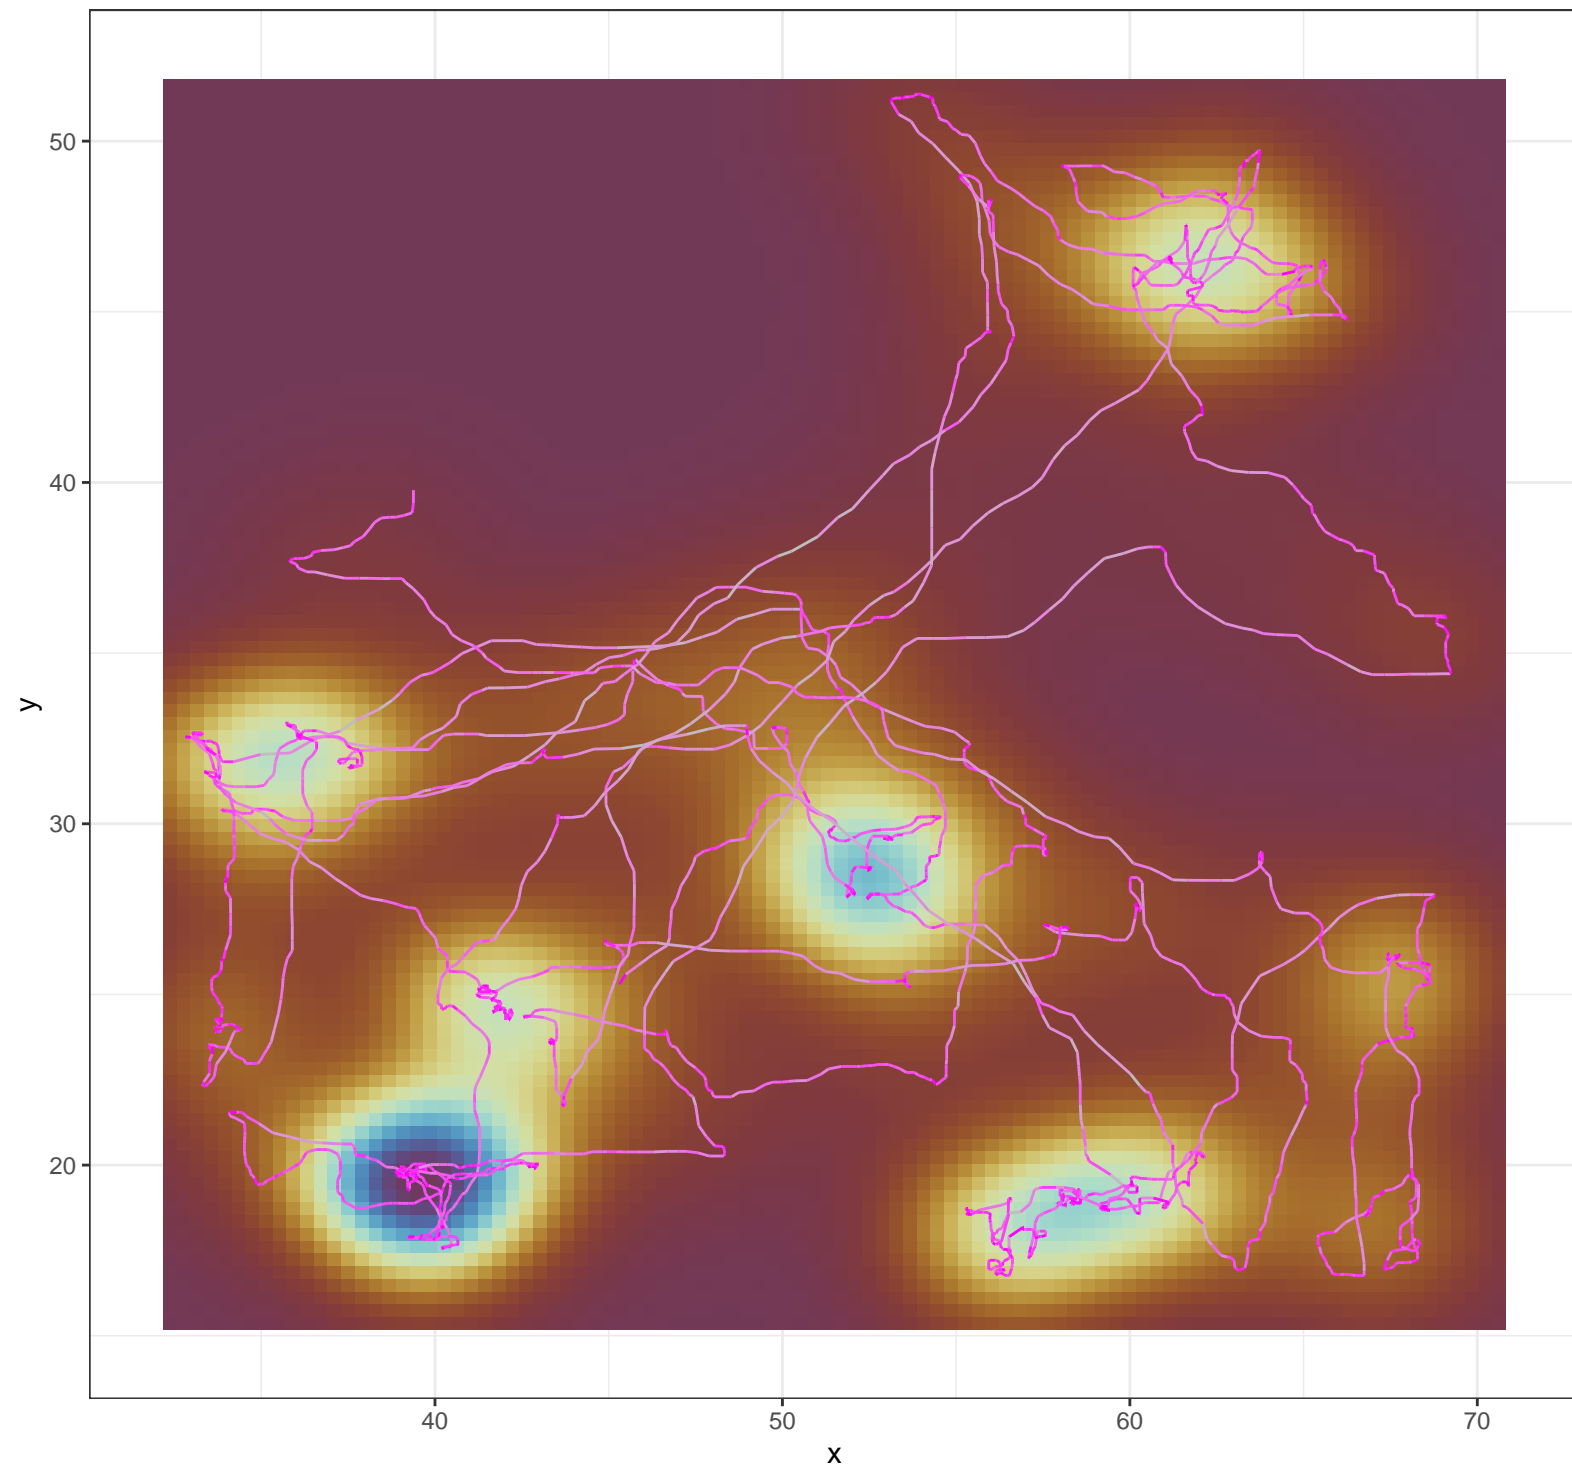

Occiput Maus\_34-21\_11\_MAH00863DLC\_resnet50\_OpenFieldDec23shuffle1\_600000\_filtered.csv

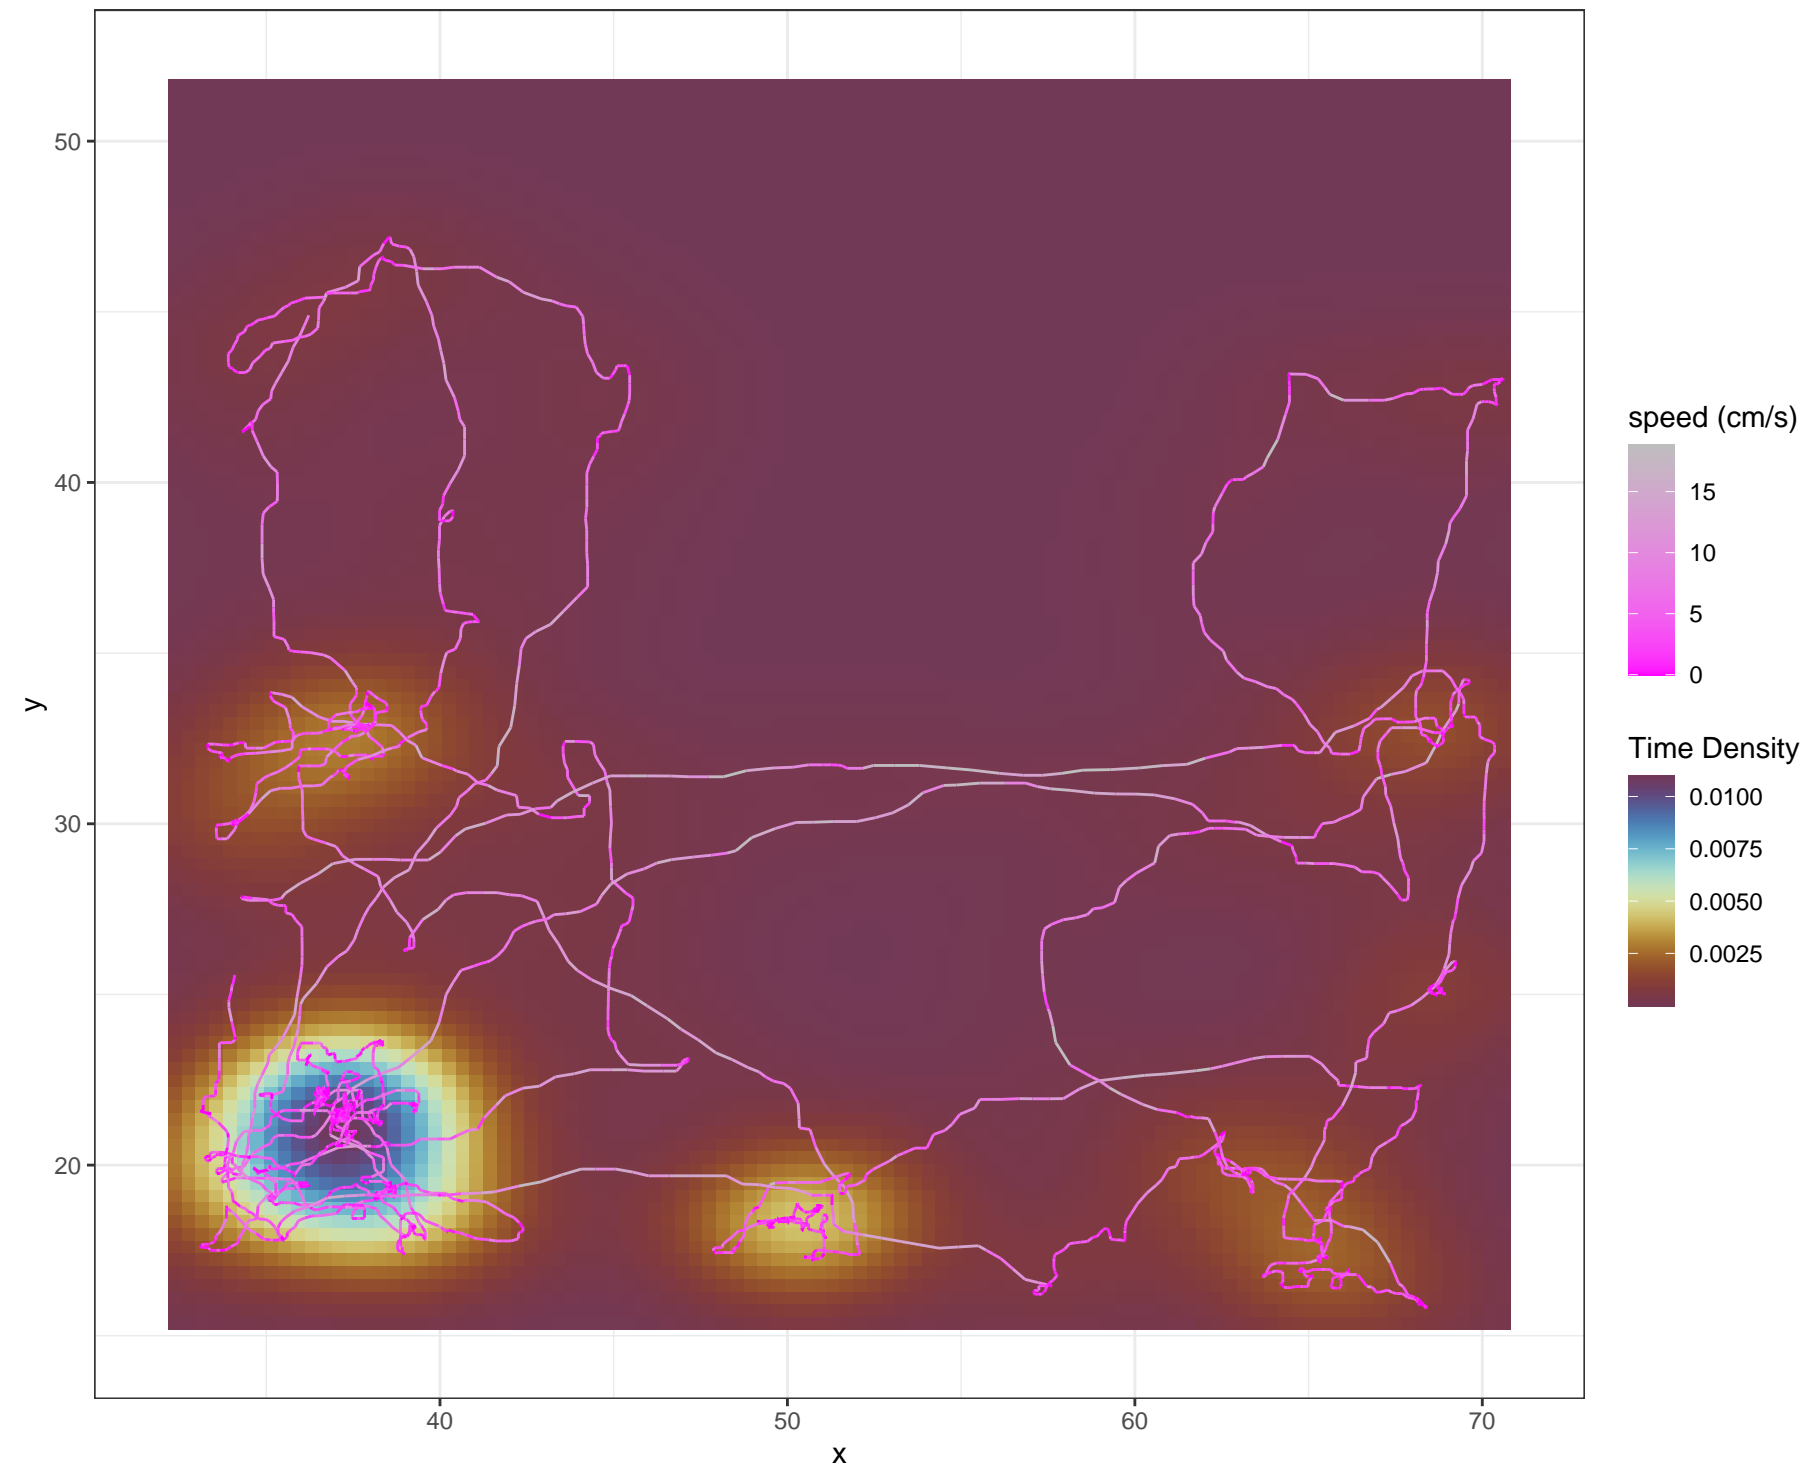



Occiput Maus\_34-21\_7\_MAH00859DLC\_resnet50\_OpenFieldDec23shuffle1\_600000\_filtered.csv

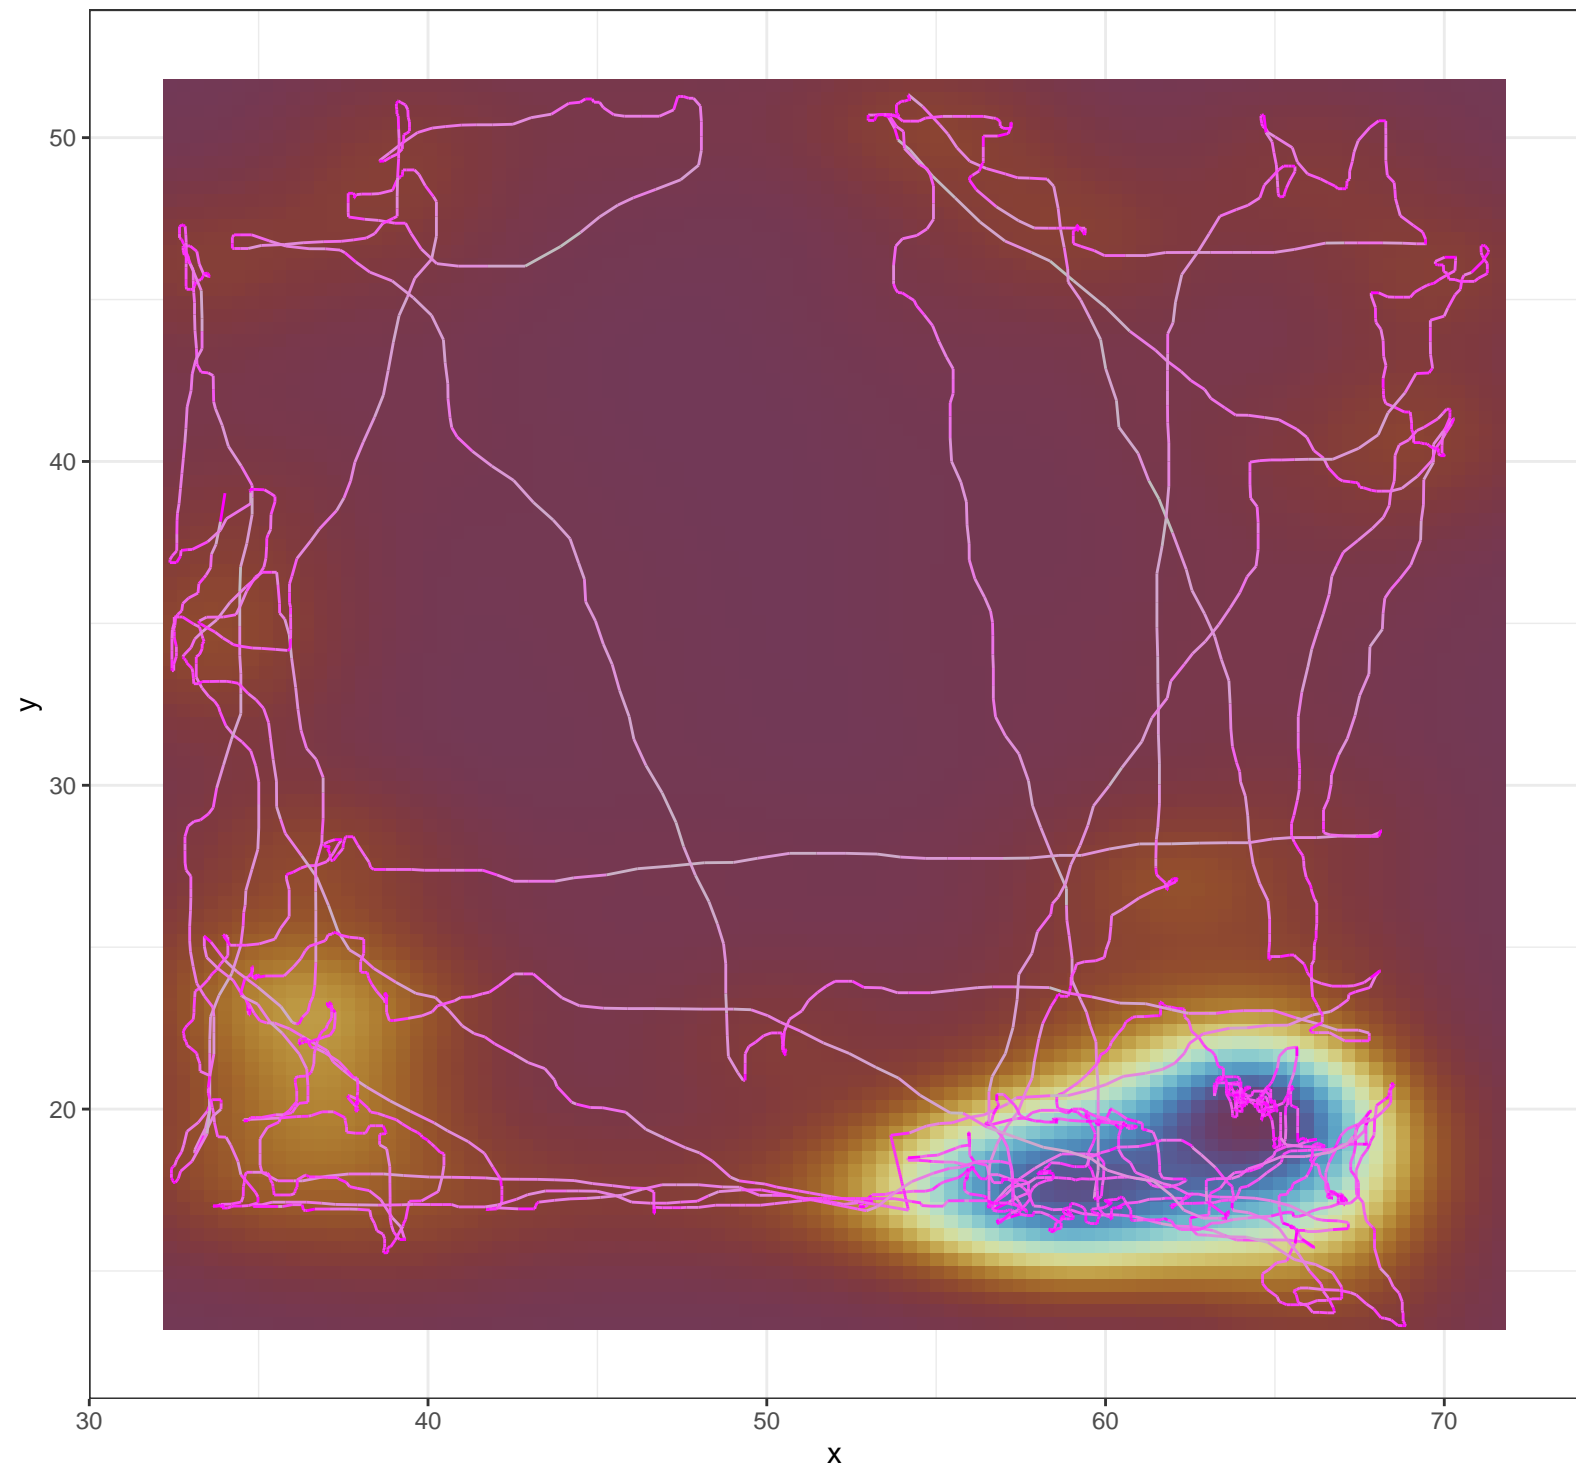

Occiput Maus\_34-21\_7\_MAH00859DLC\_resnet50\_OpenFieldDec23shuffle1\_600000\_filtered.csv

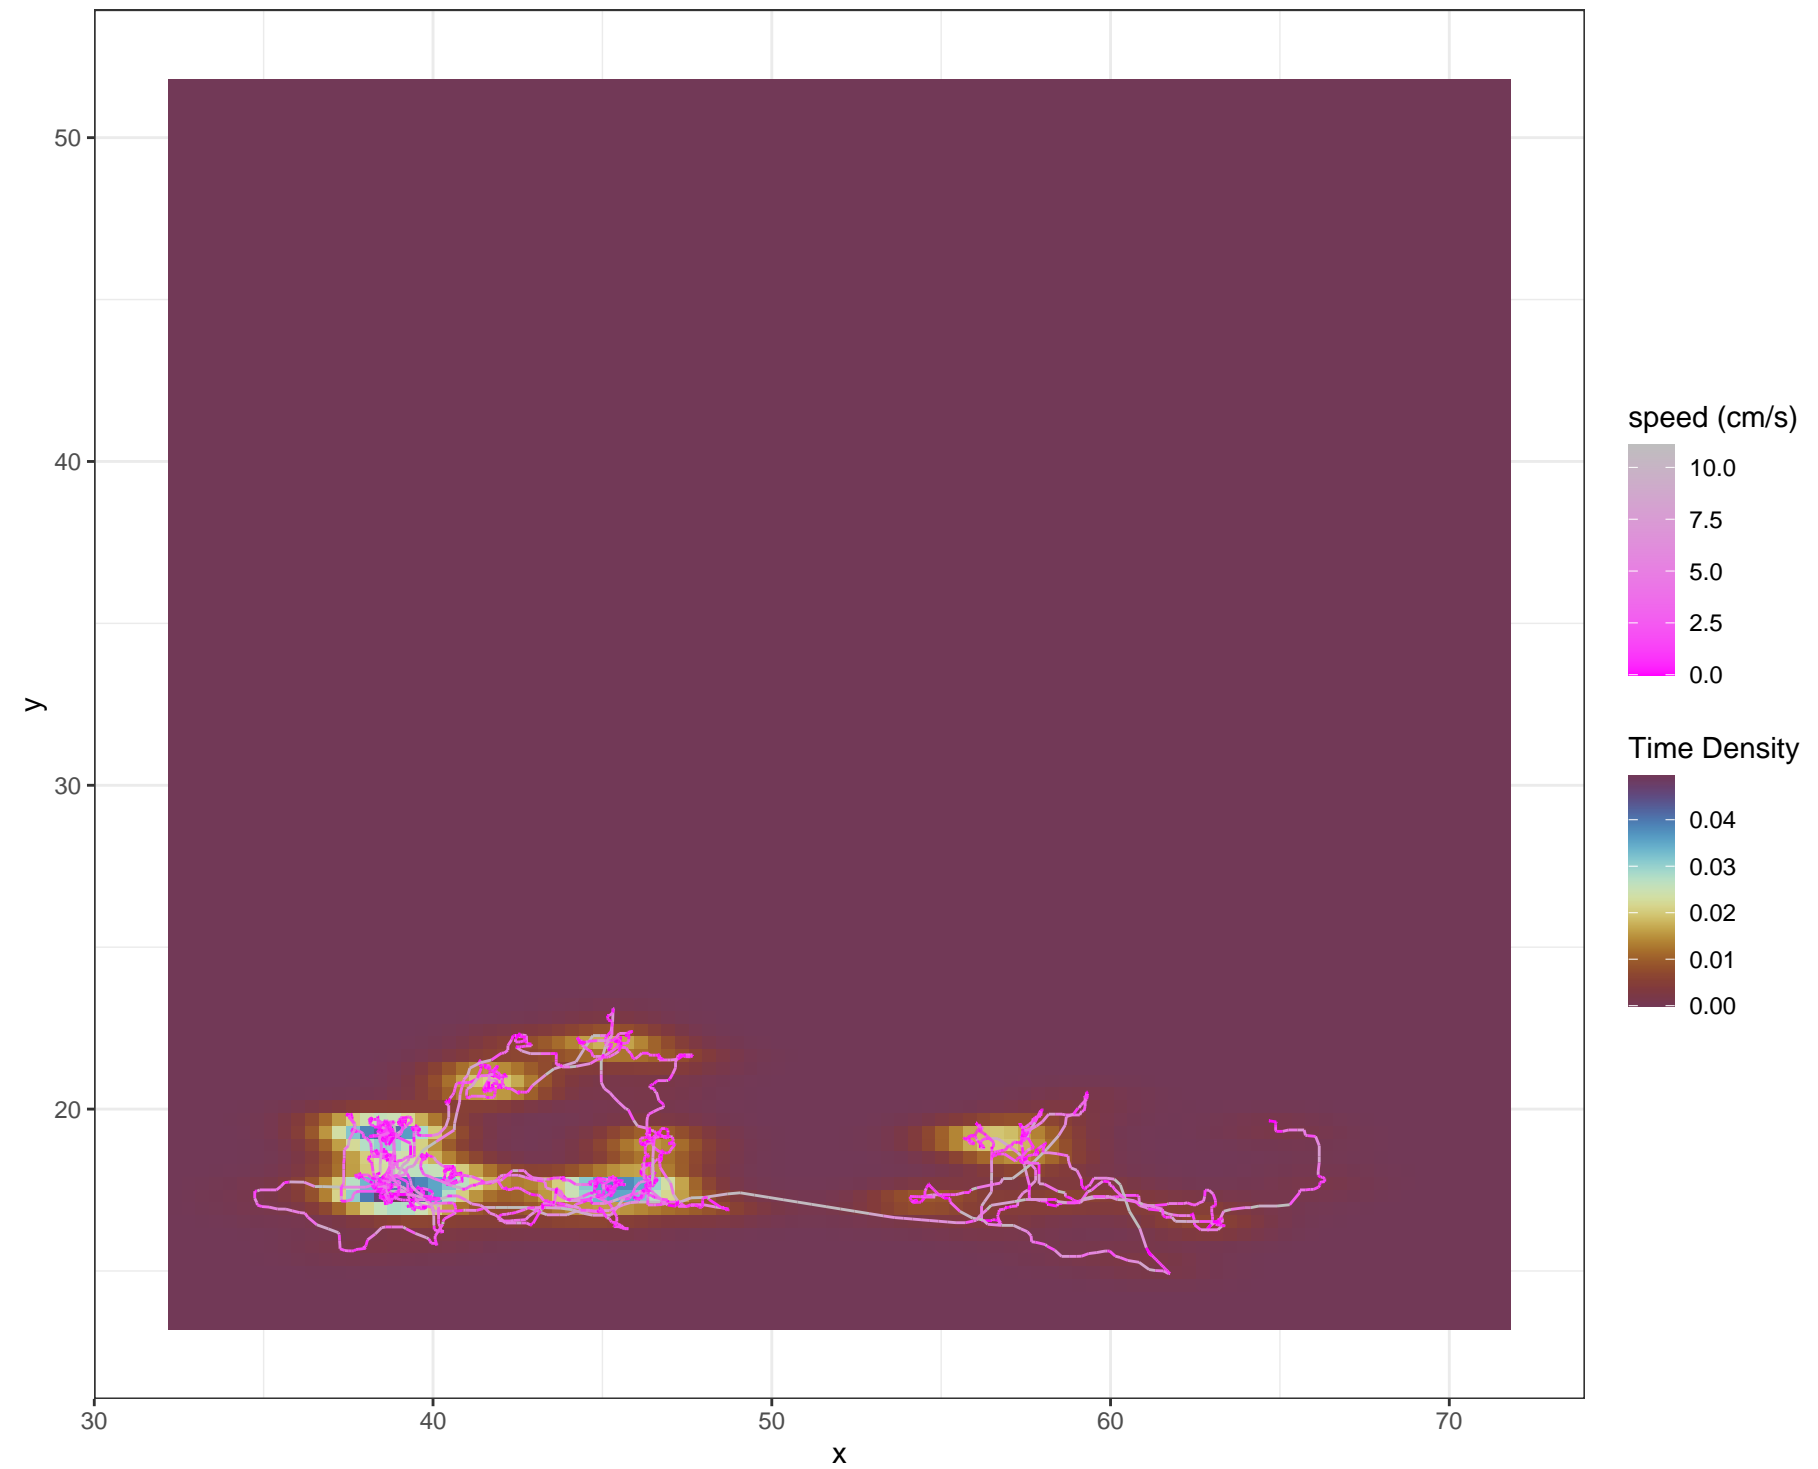



Occiput Maus\_35A-20\_LED1\_MAH00335DLC\_resnet50\_OpenFieldDec23shuffle1\_600000\_filtered.csv

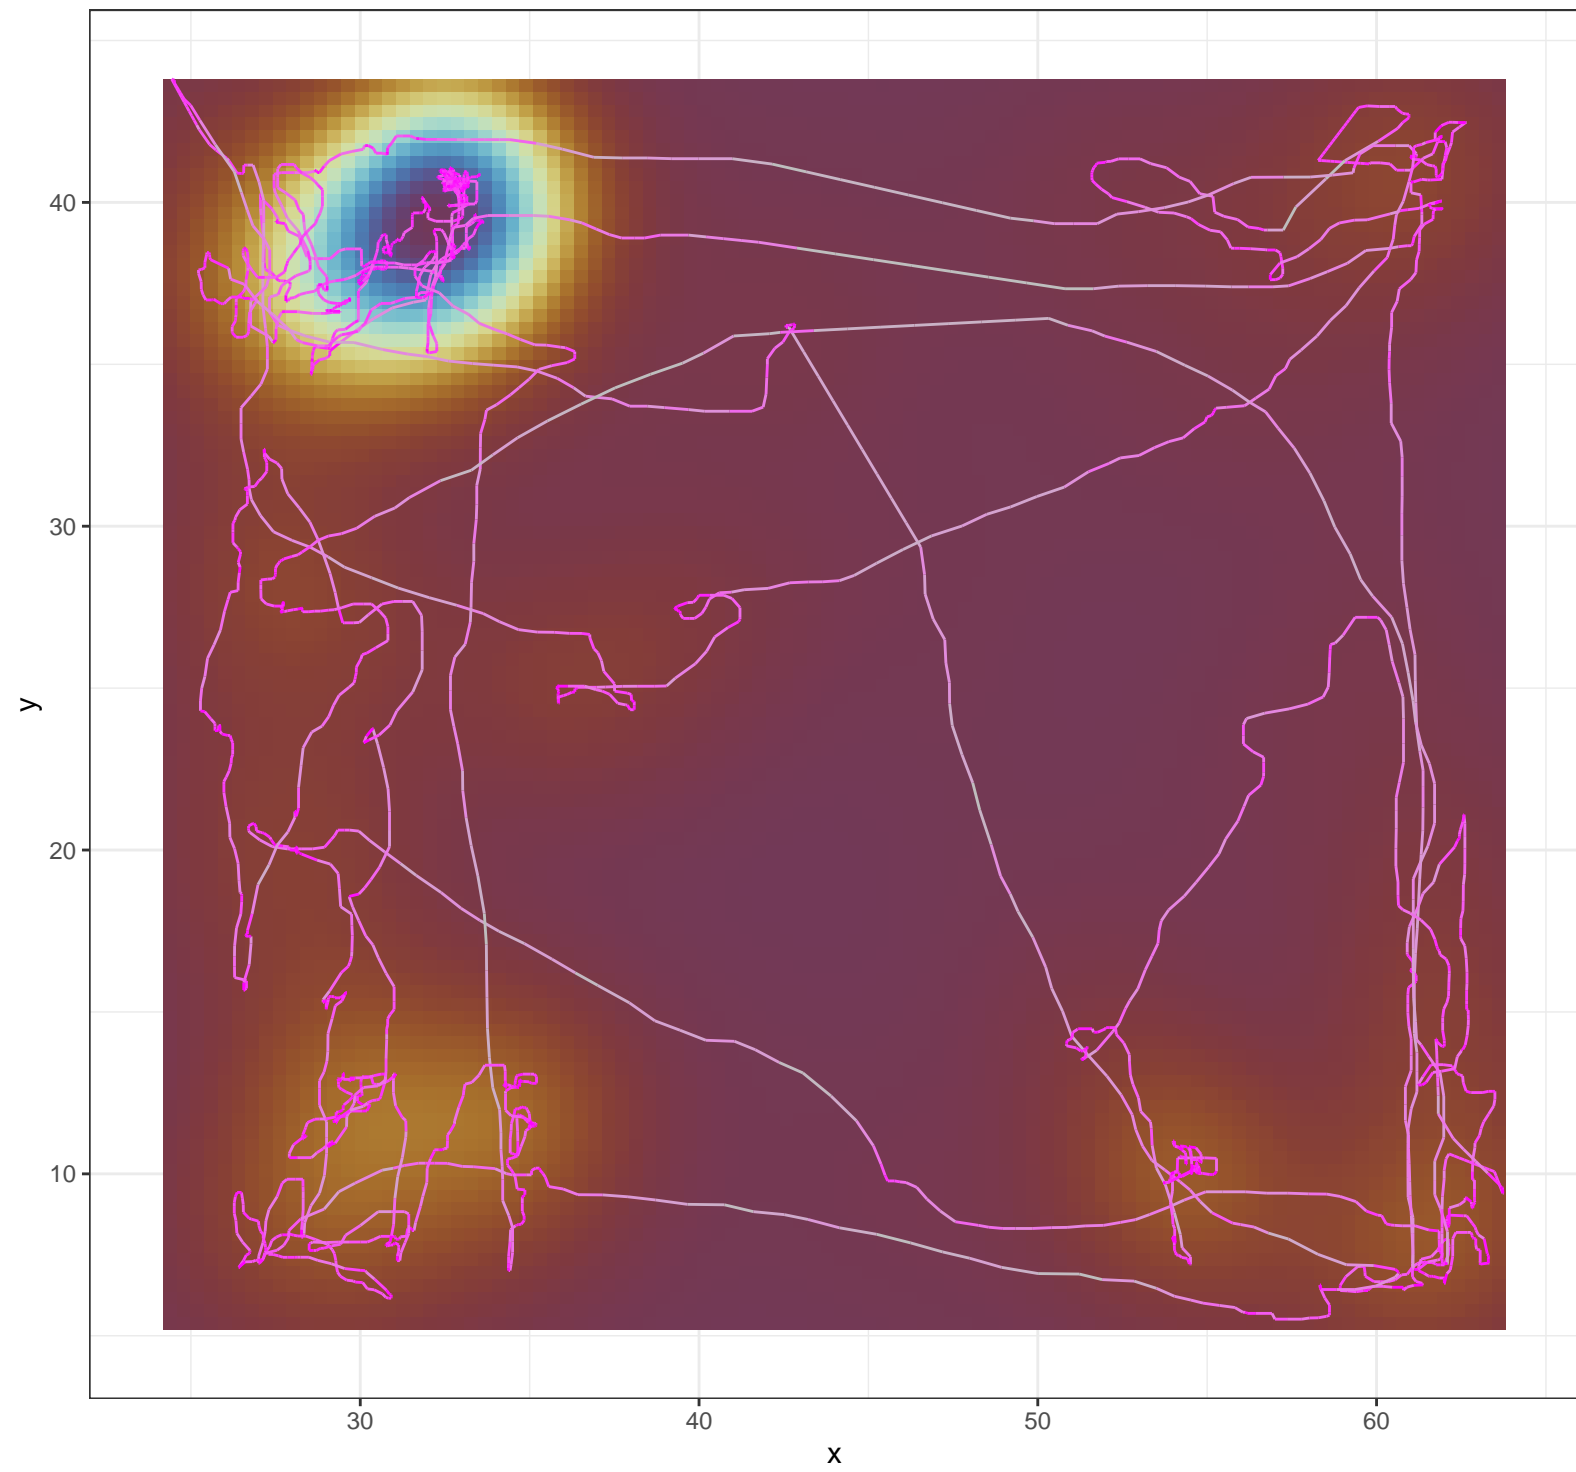

Occiput Maus\_35A-20\_LED1\_MAH00335DLC\_resnet50\_OpenFieldDec23shuffle1\_600000\_filtered.csv

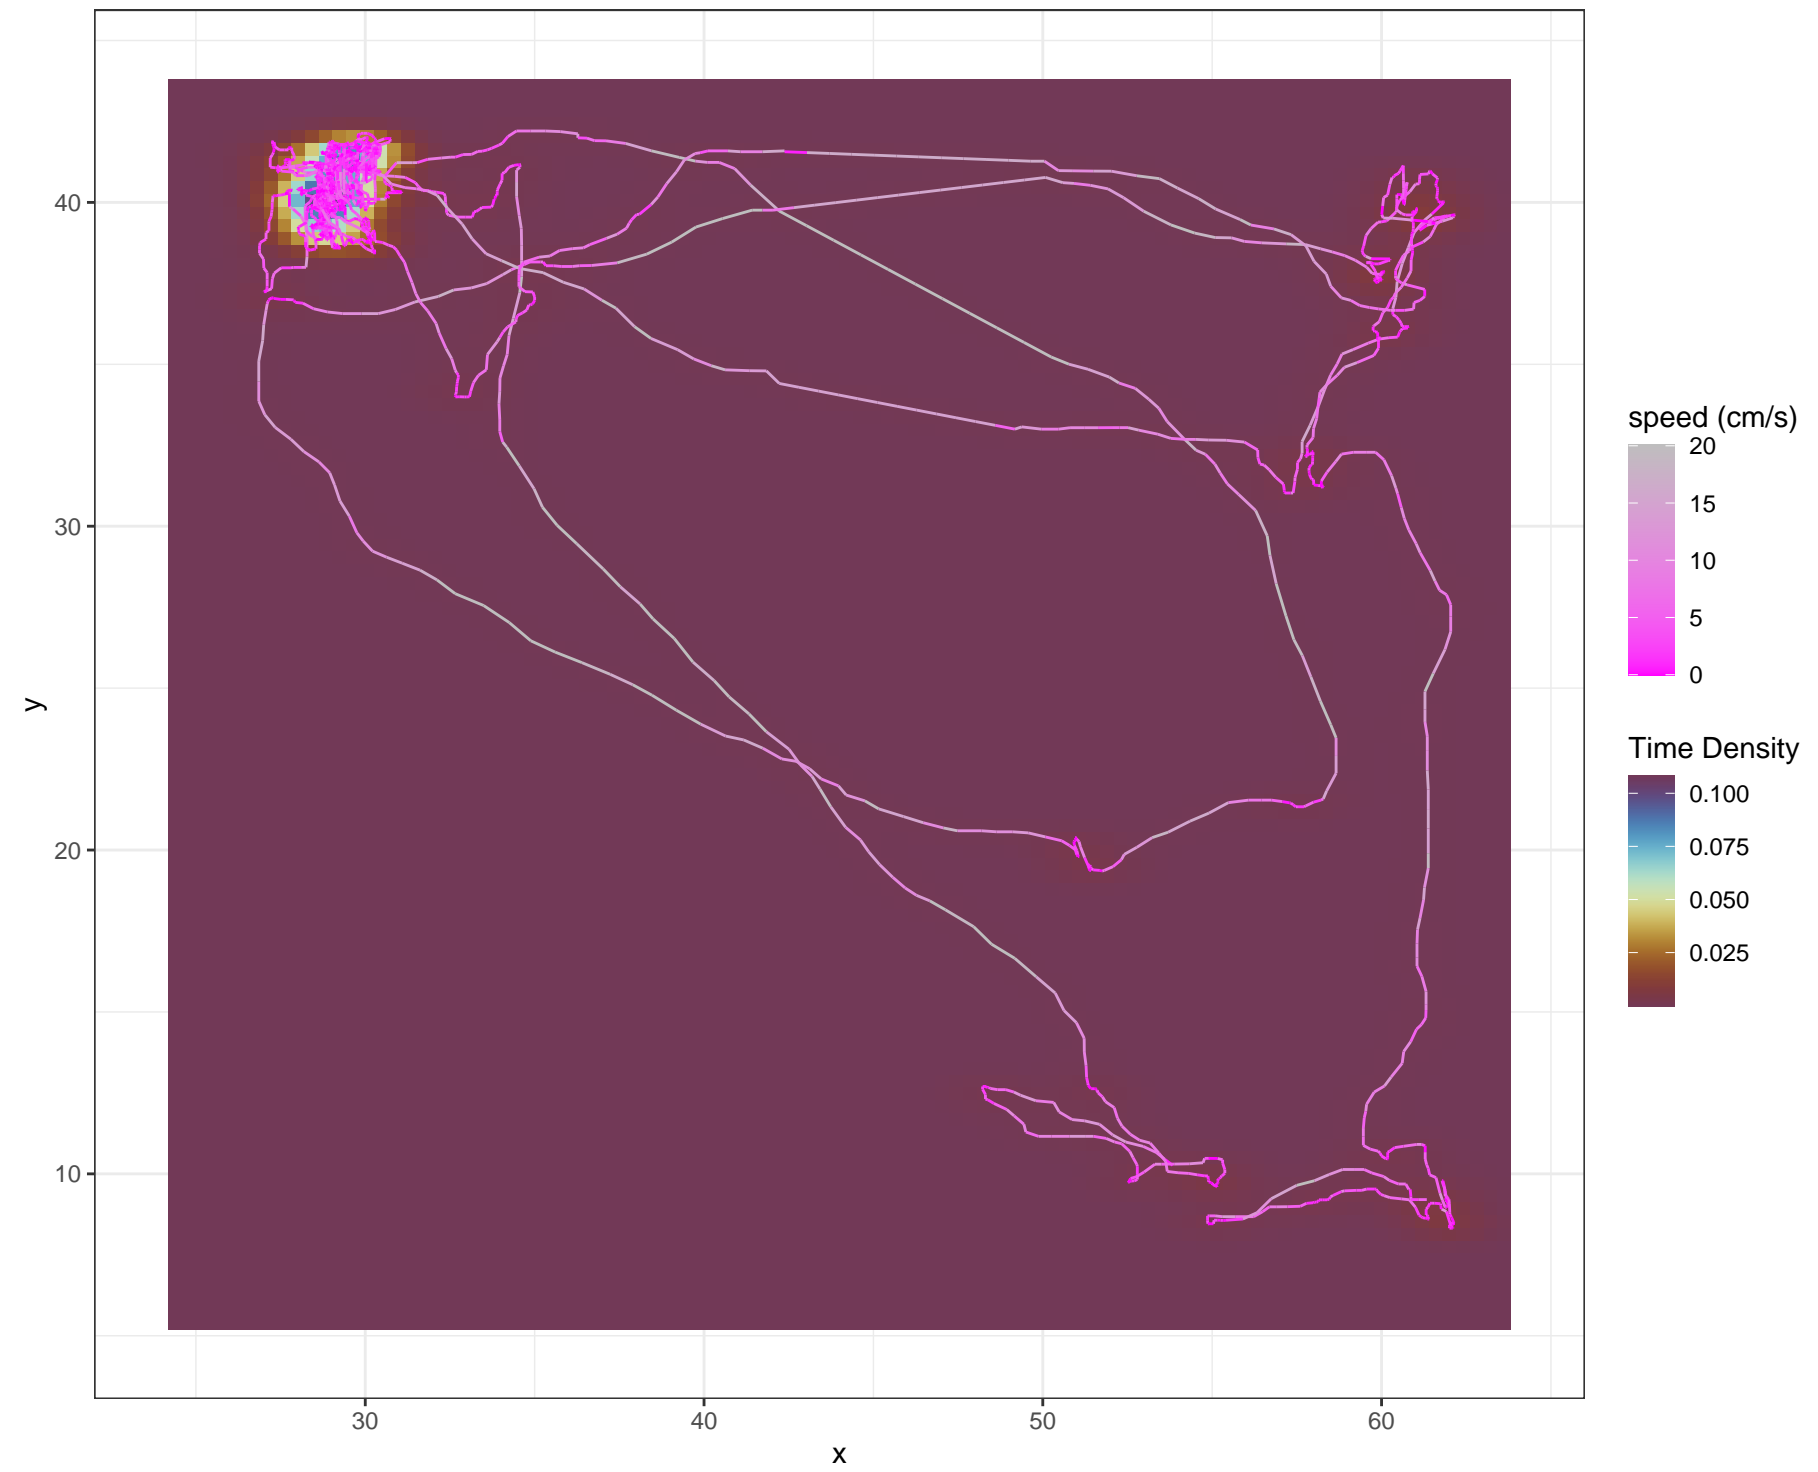

Occiput Maus\_35B-20\_LED1\_MAH00339DLC\_resnet50\_OpenFieldDec23shuffle1\_600000\_filtered.csv

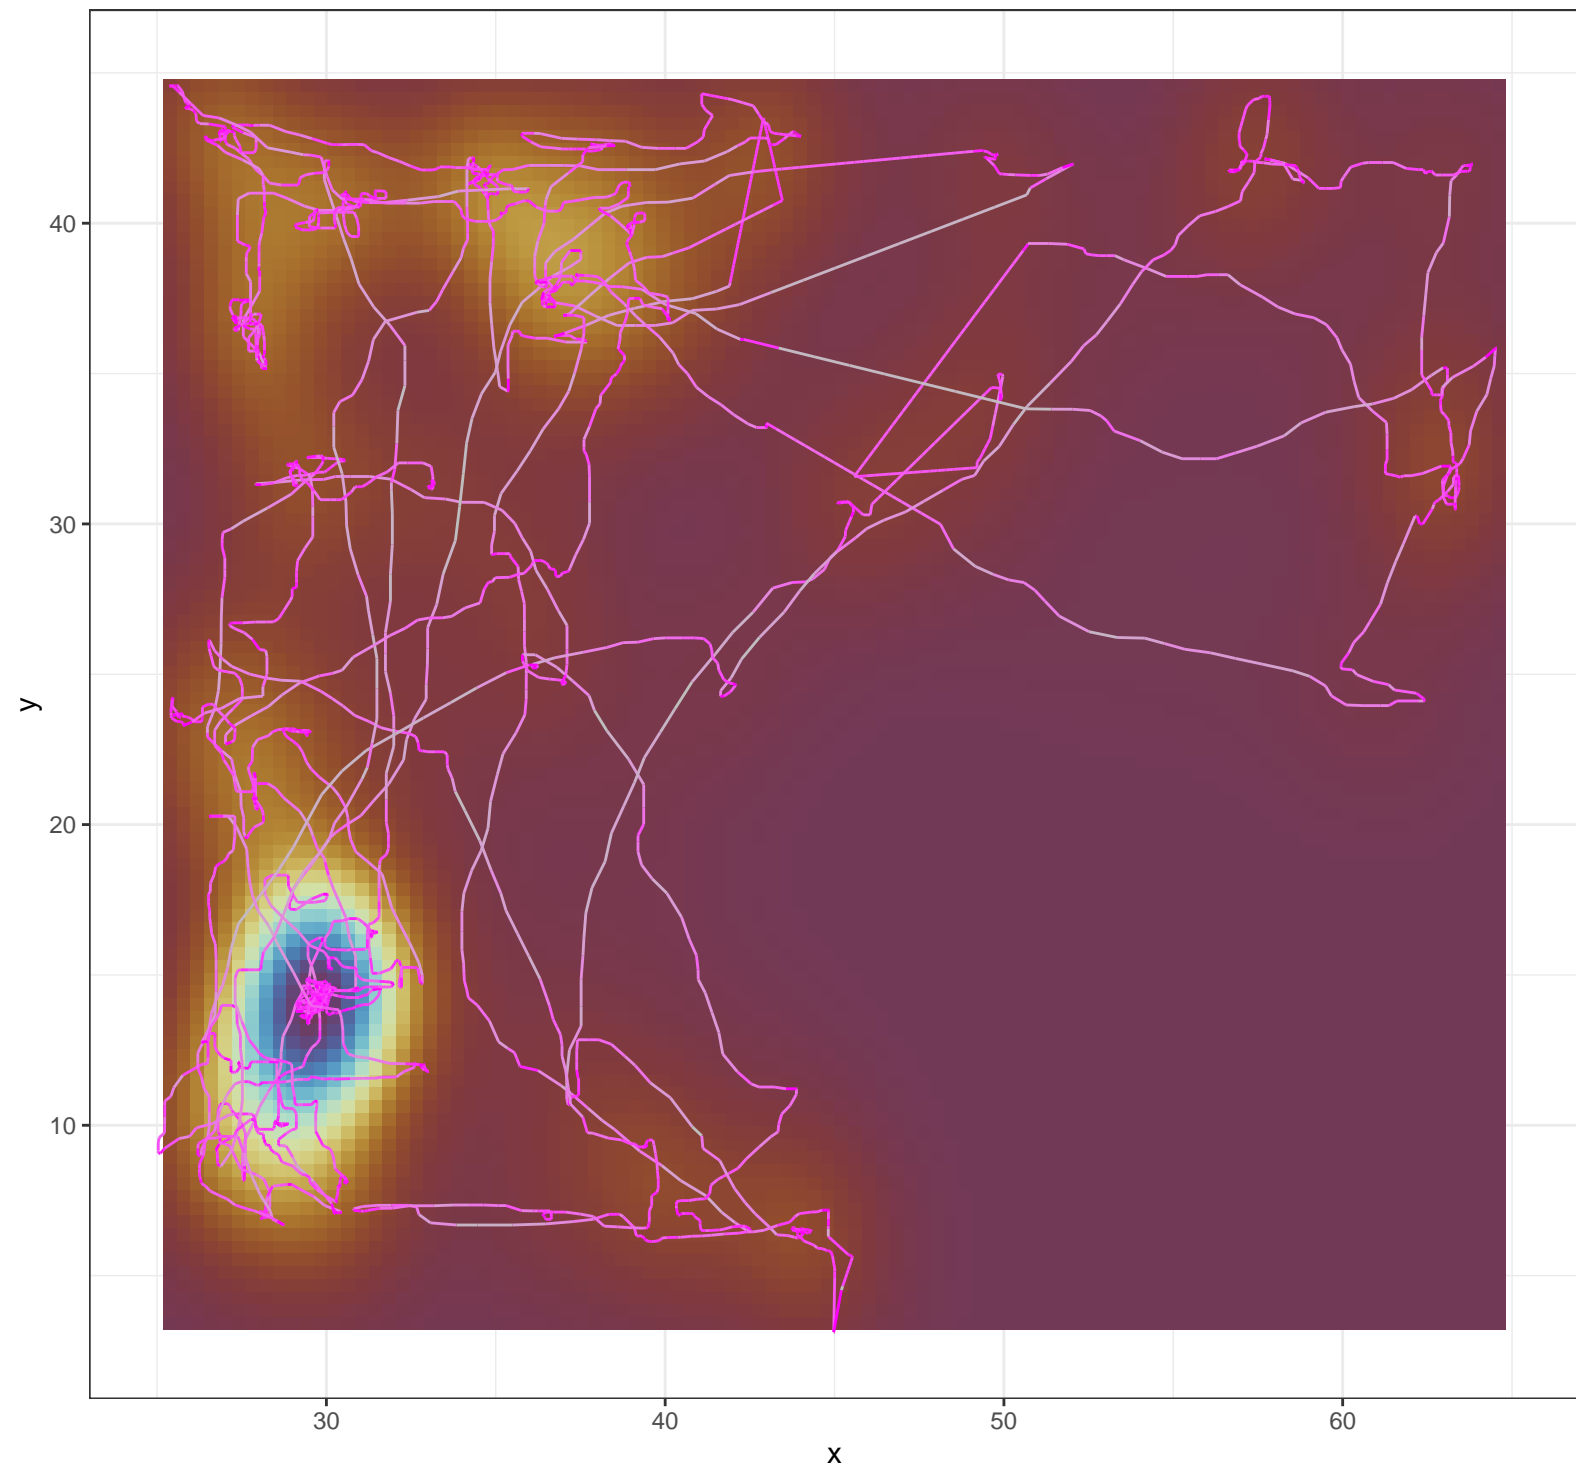

Time Density

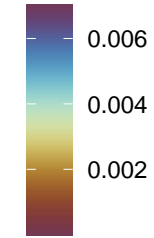

speed (cm/s)

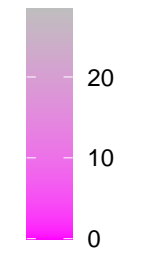

Occiput Maus\_35B-20\_LED1\_MAH00339DLC\_resnet50\_OpenFieldDec23shuffle1\_600000\_filtered.csv

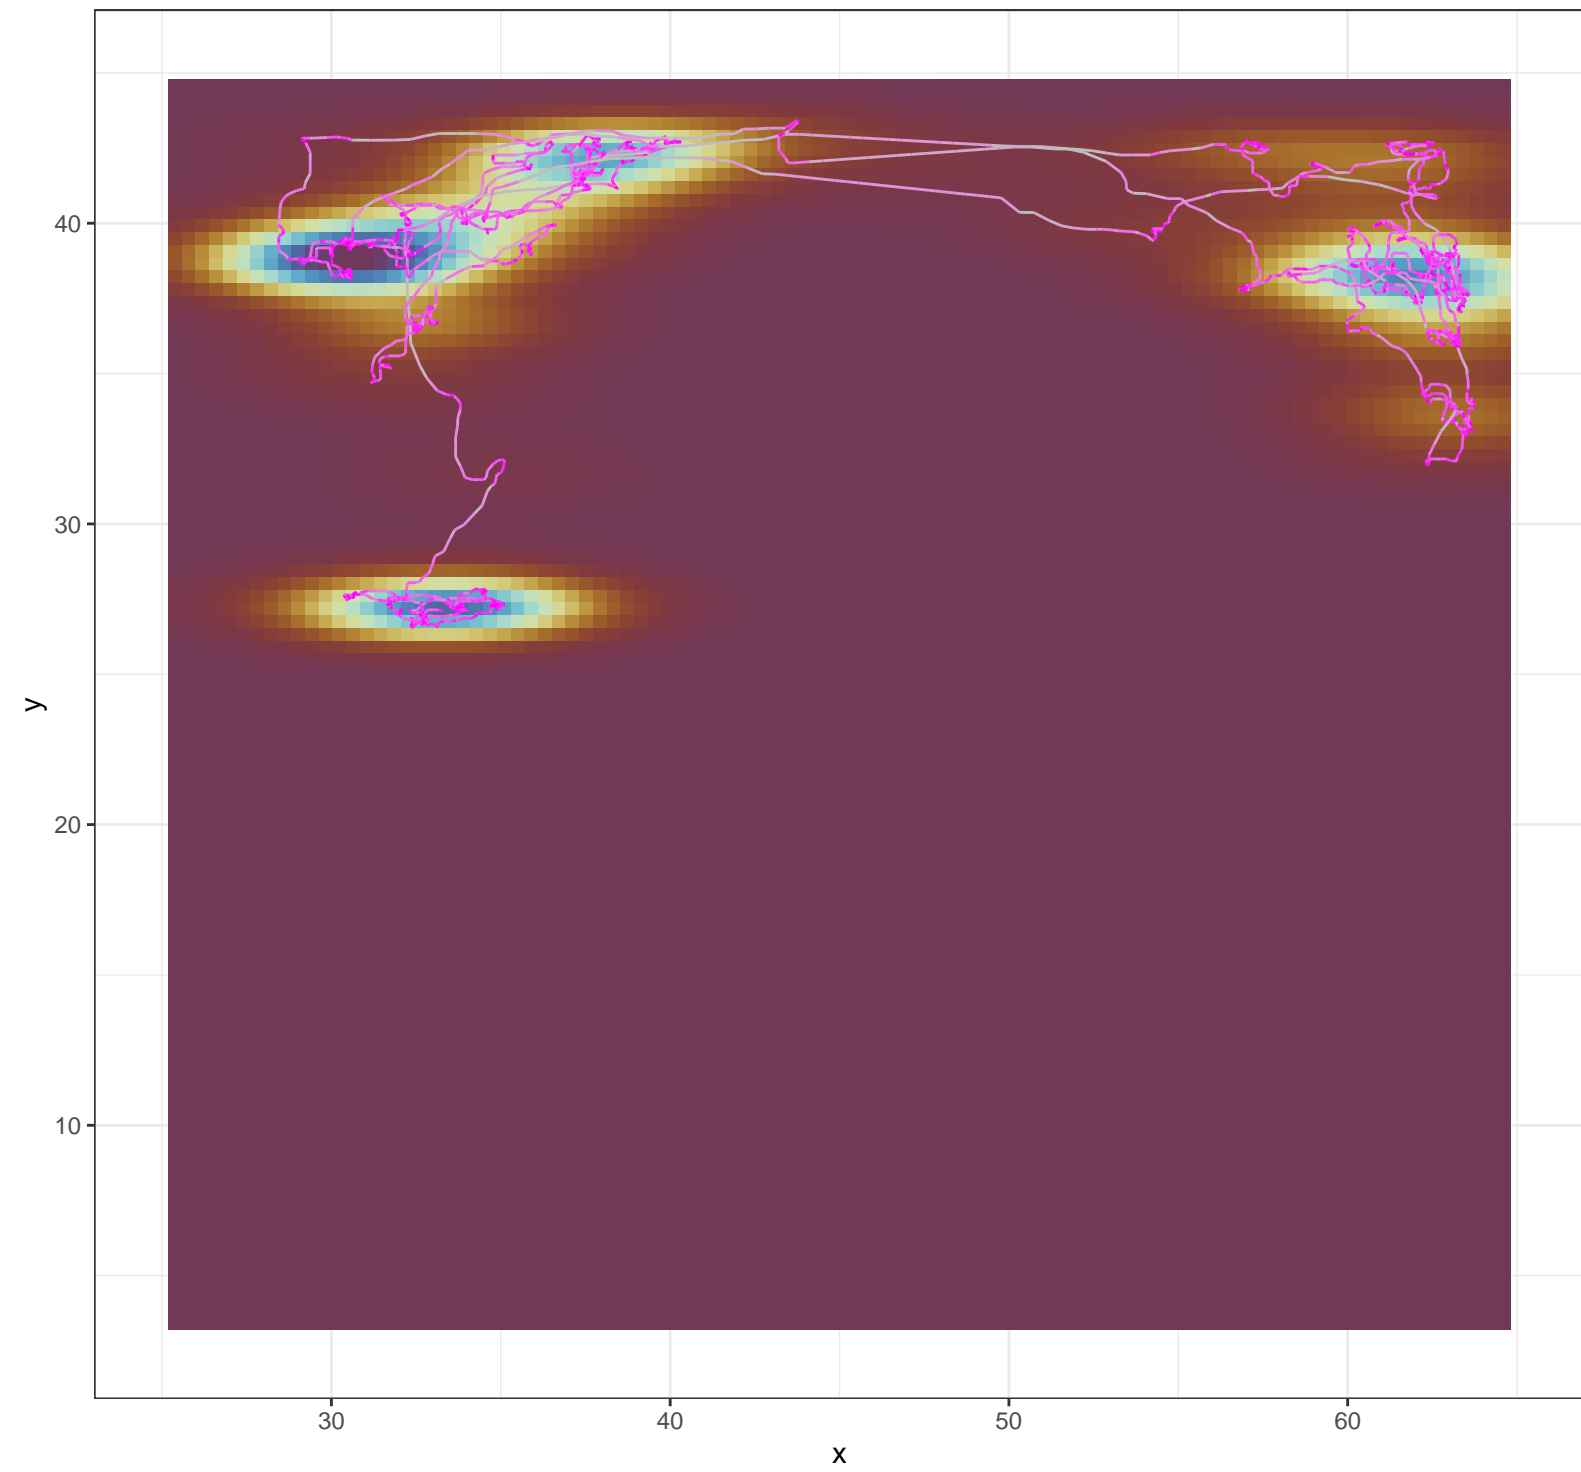

speed (cm/s)

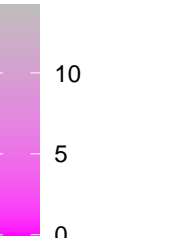

Time Density

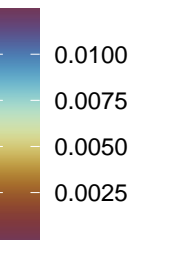

Occiput Maus\_35C-20\_LED1\_MAH00336DLC\_resnet50\_OpenFieldDec23shuffle1\_600000\_filtered.csv

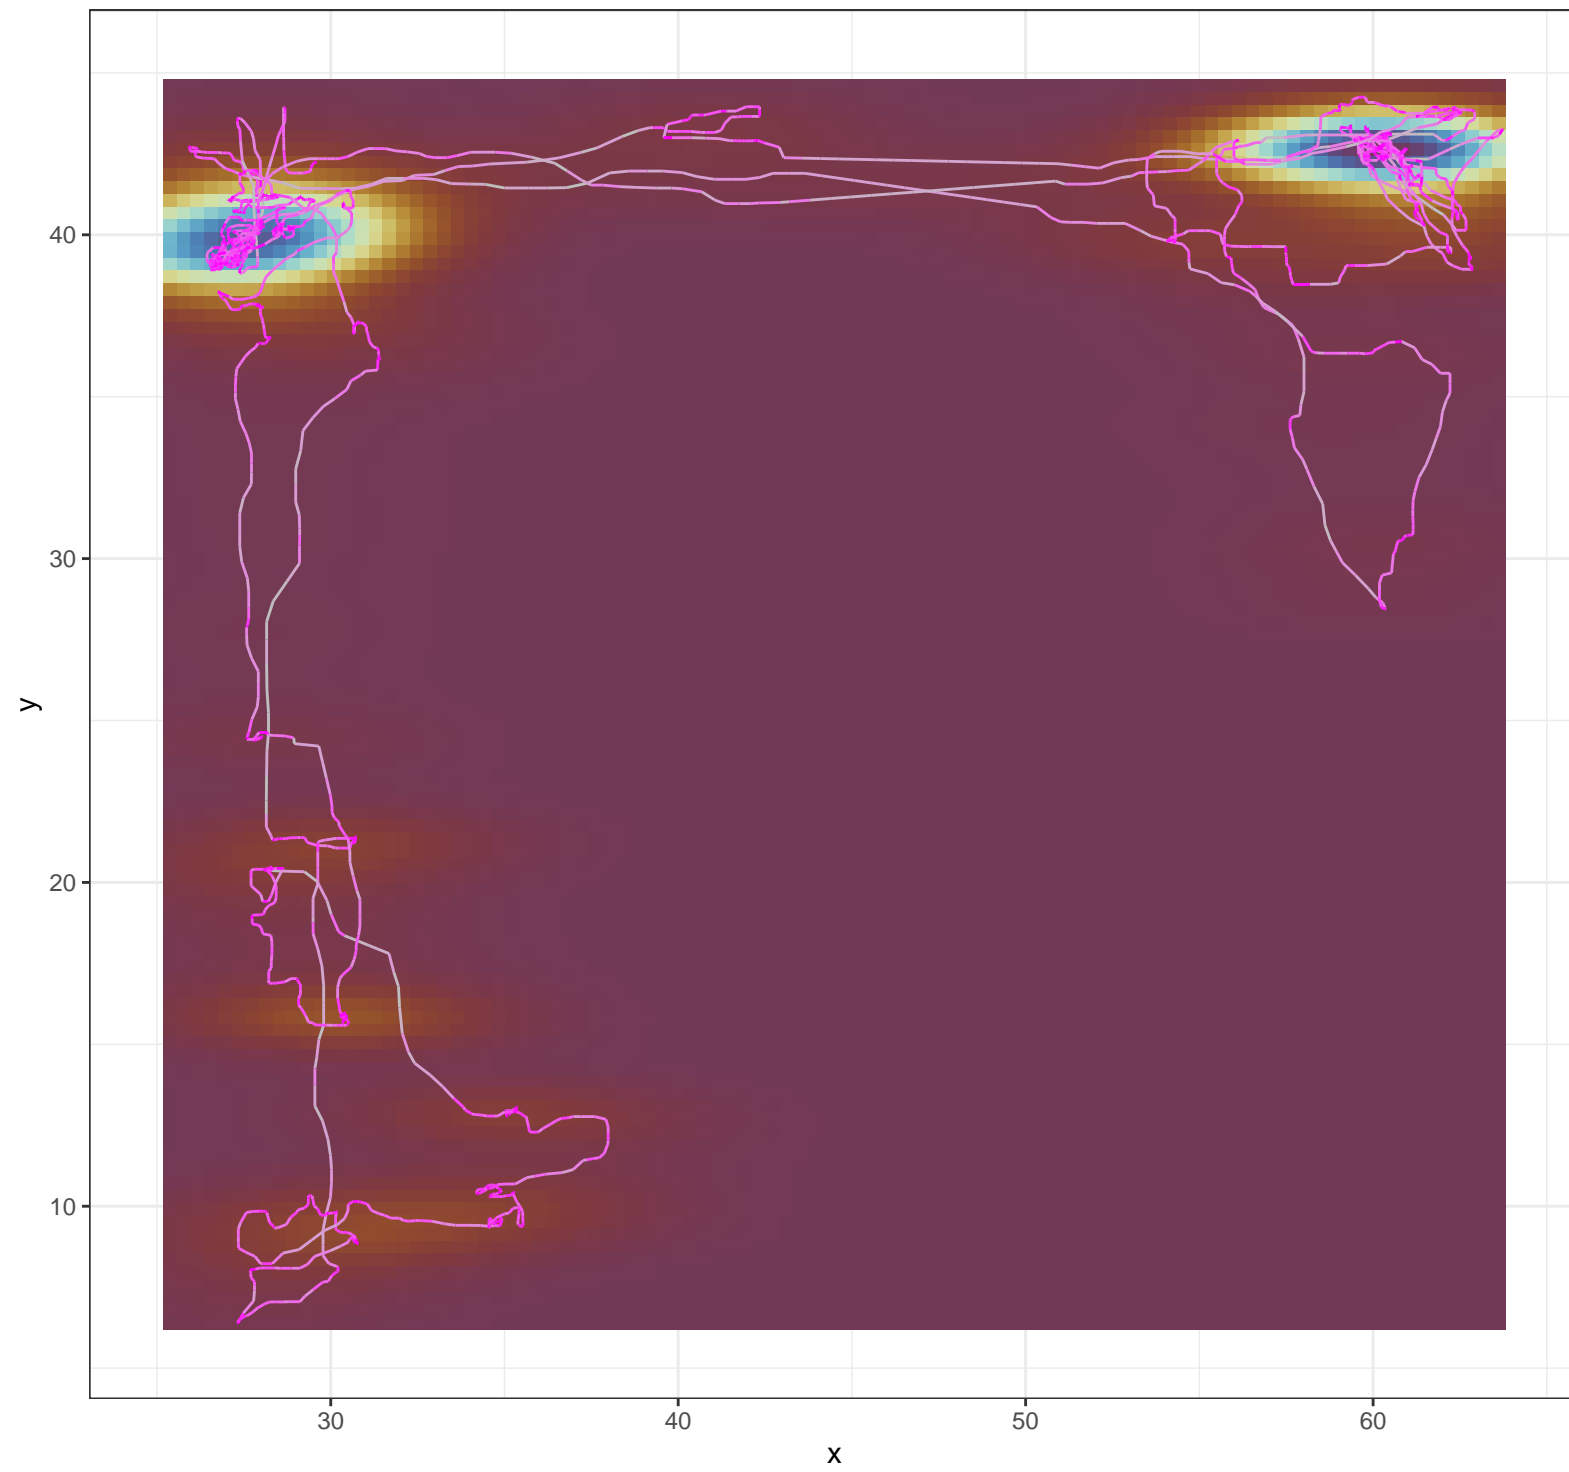

speed (cm/s)

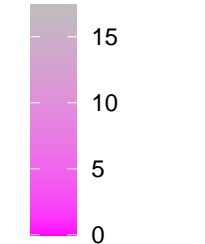

Time Density

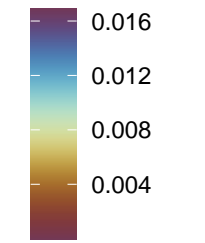

Occiput Maus\_35C-20\_LED1\_MAH00336DLC\_resnet50\_OpenFieldDec23shuffle1\_600000\_filtered.csv

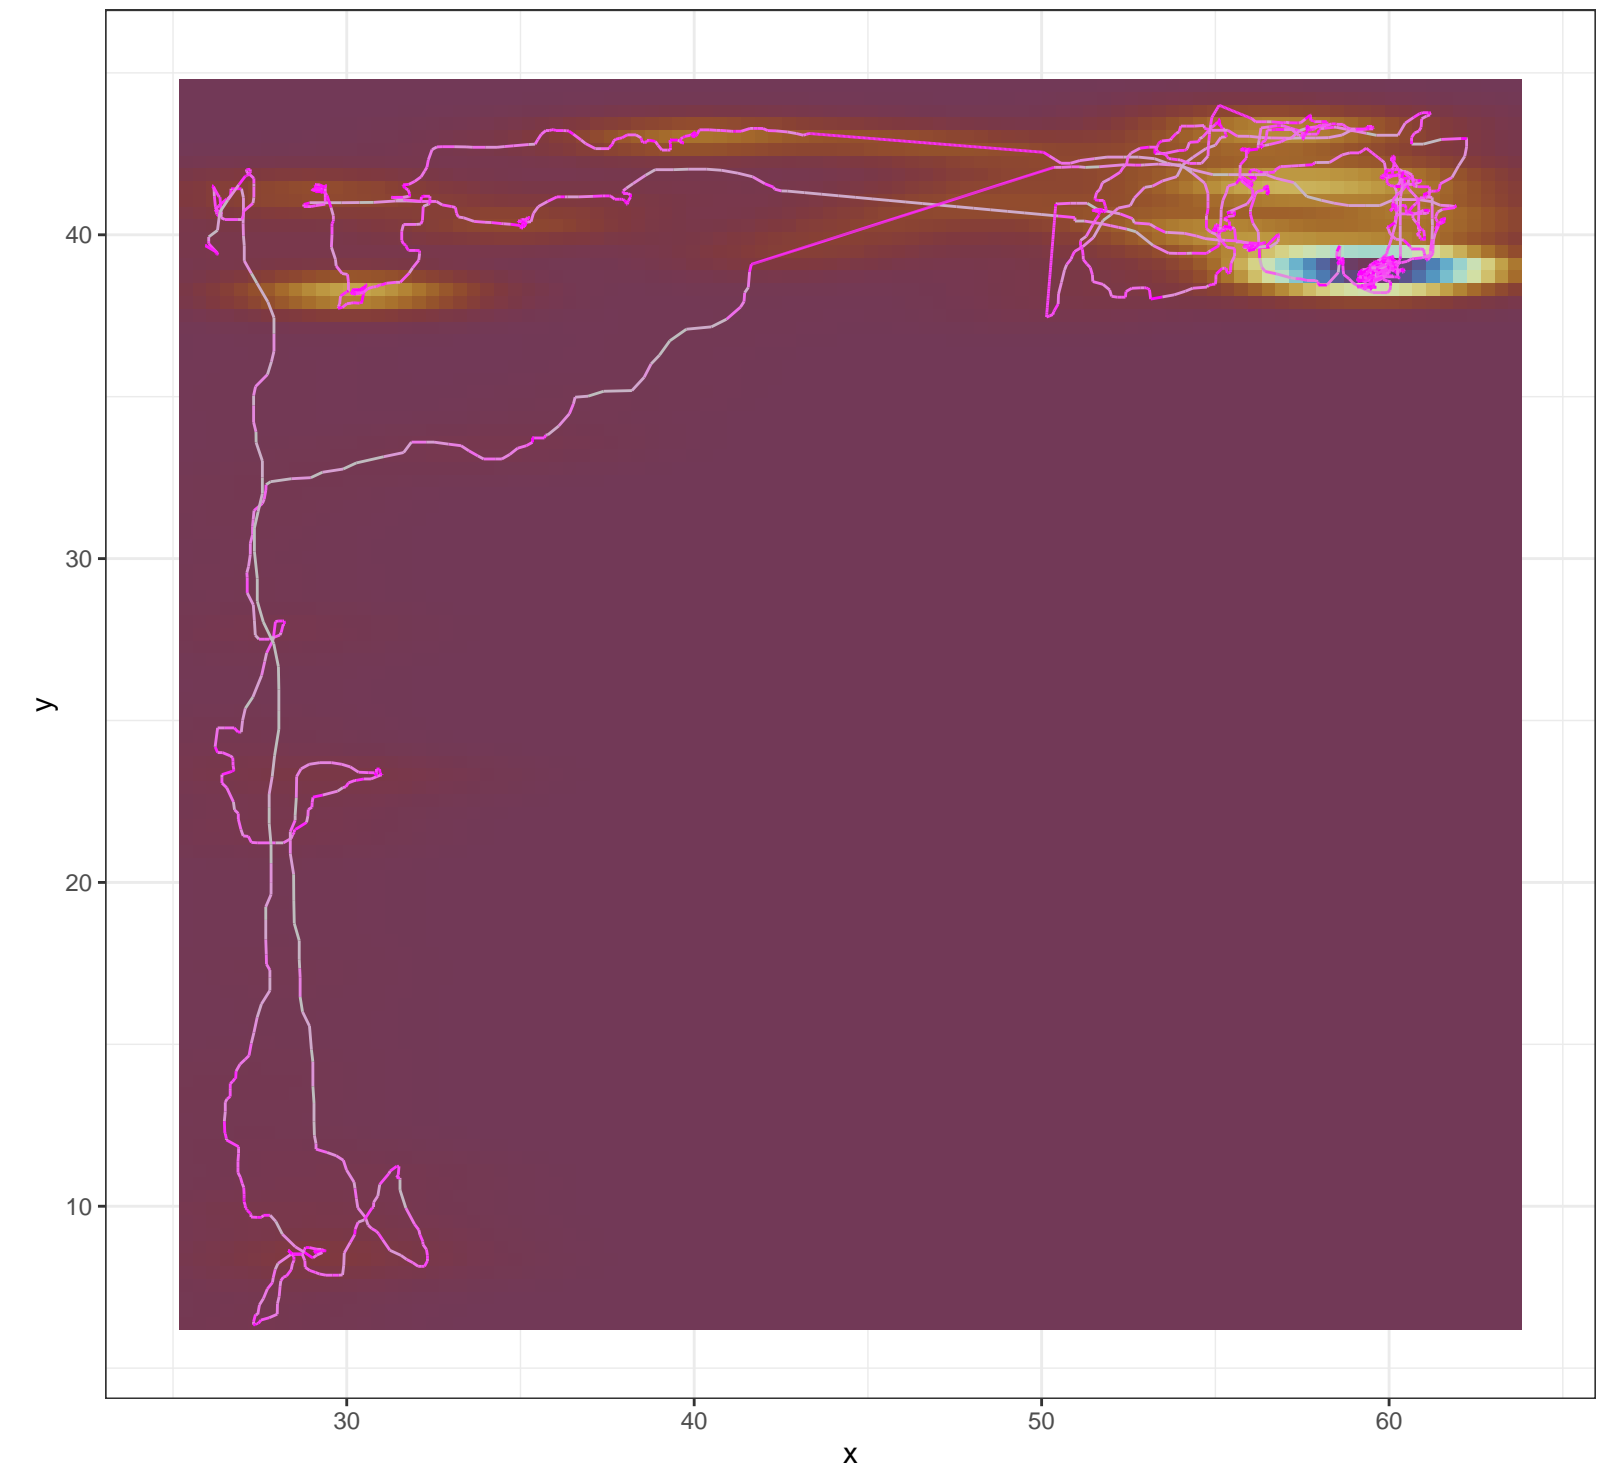

speed (cm/s)

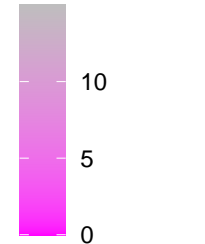

Time Density

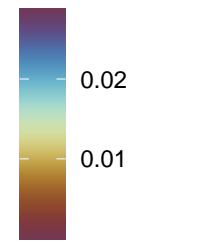

Occiput Maus\_35D-20\_LED1\_MAH00337DLC\_resnet50\_OpenFieldDec23shuffle1\_600000\_filtered.csv

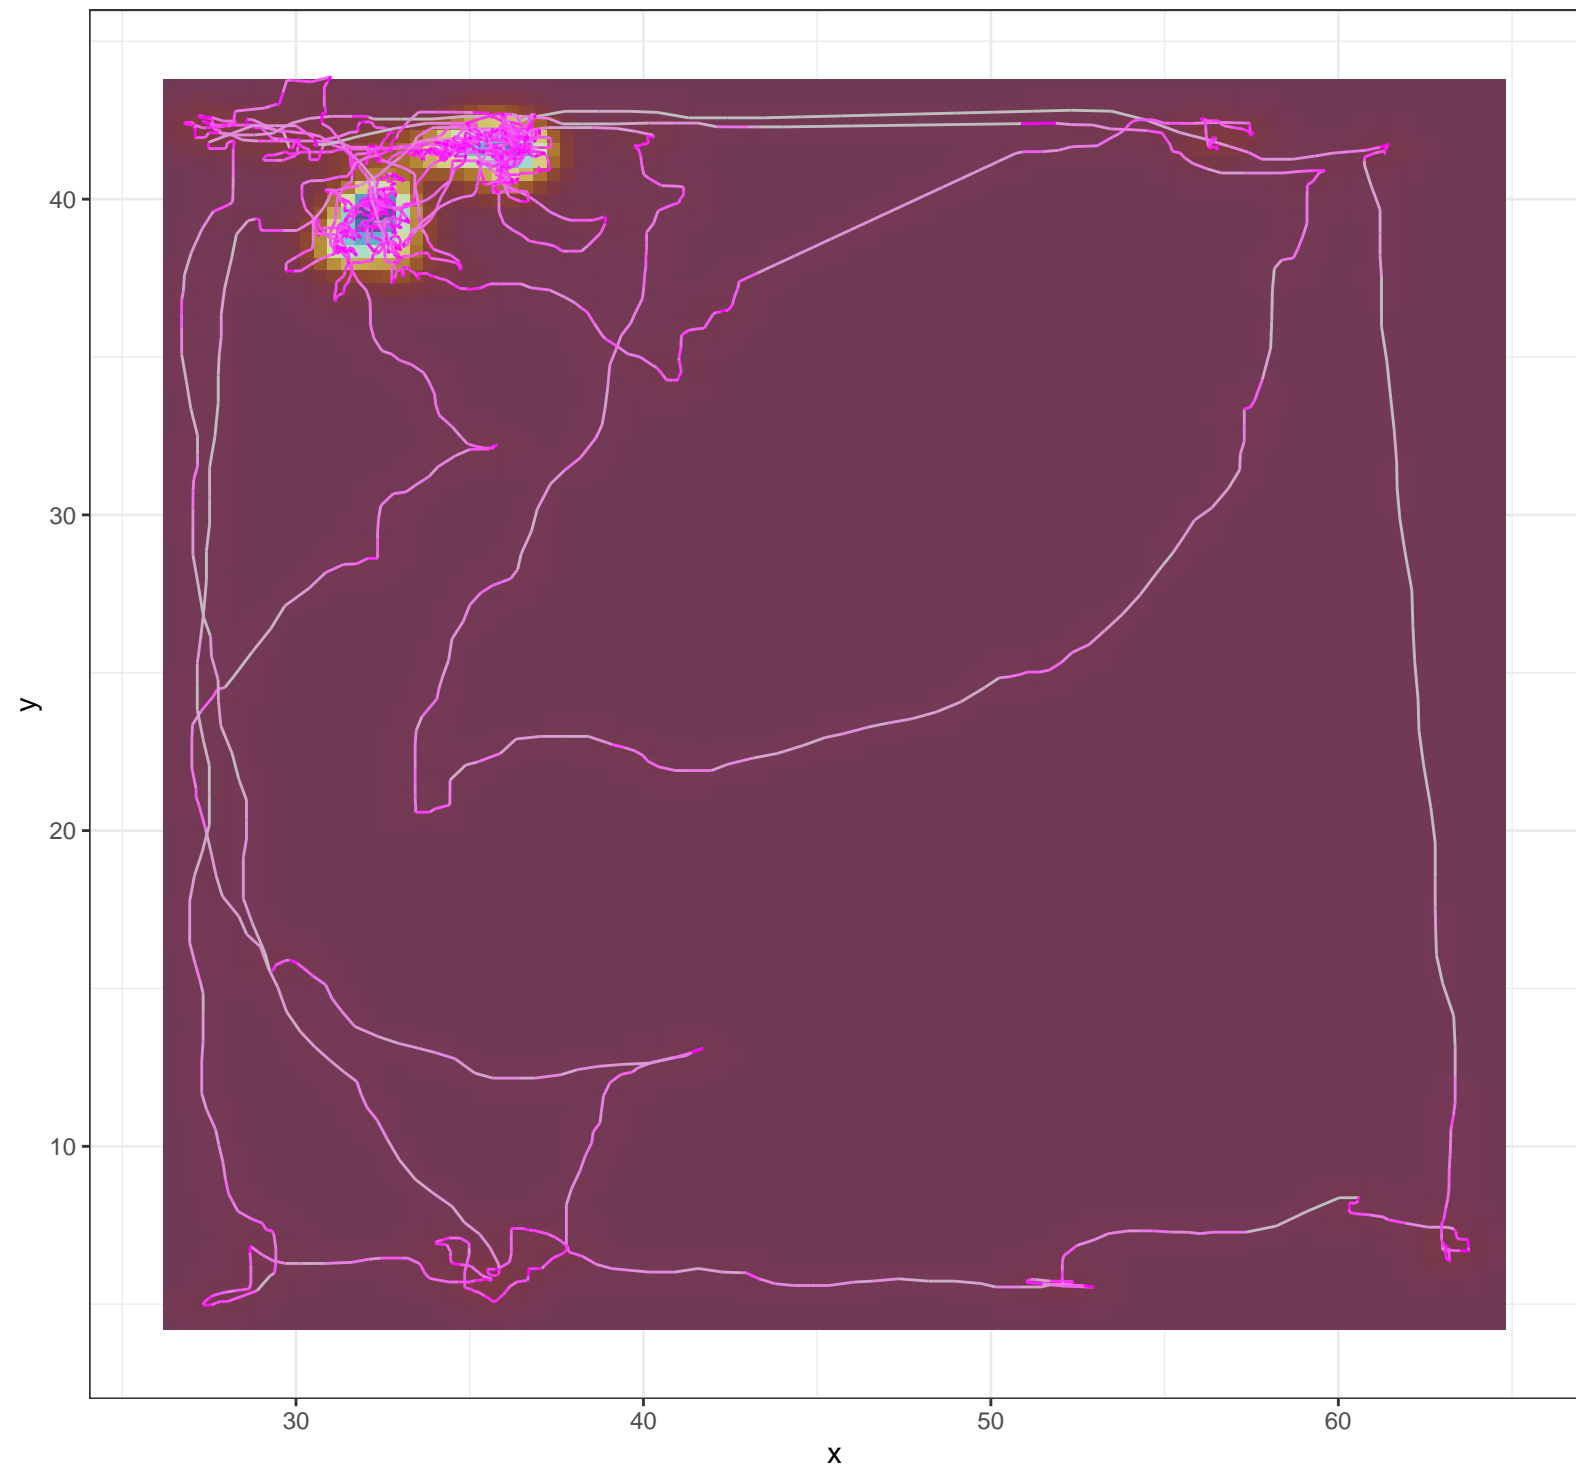

Occiput Maus\_35D-20\_LED1\_MAH00337DLC\_resnet50\_OpenFieldDec23shuffle1\_600000\_filtered.csv

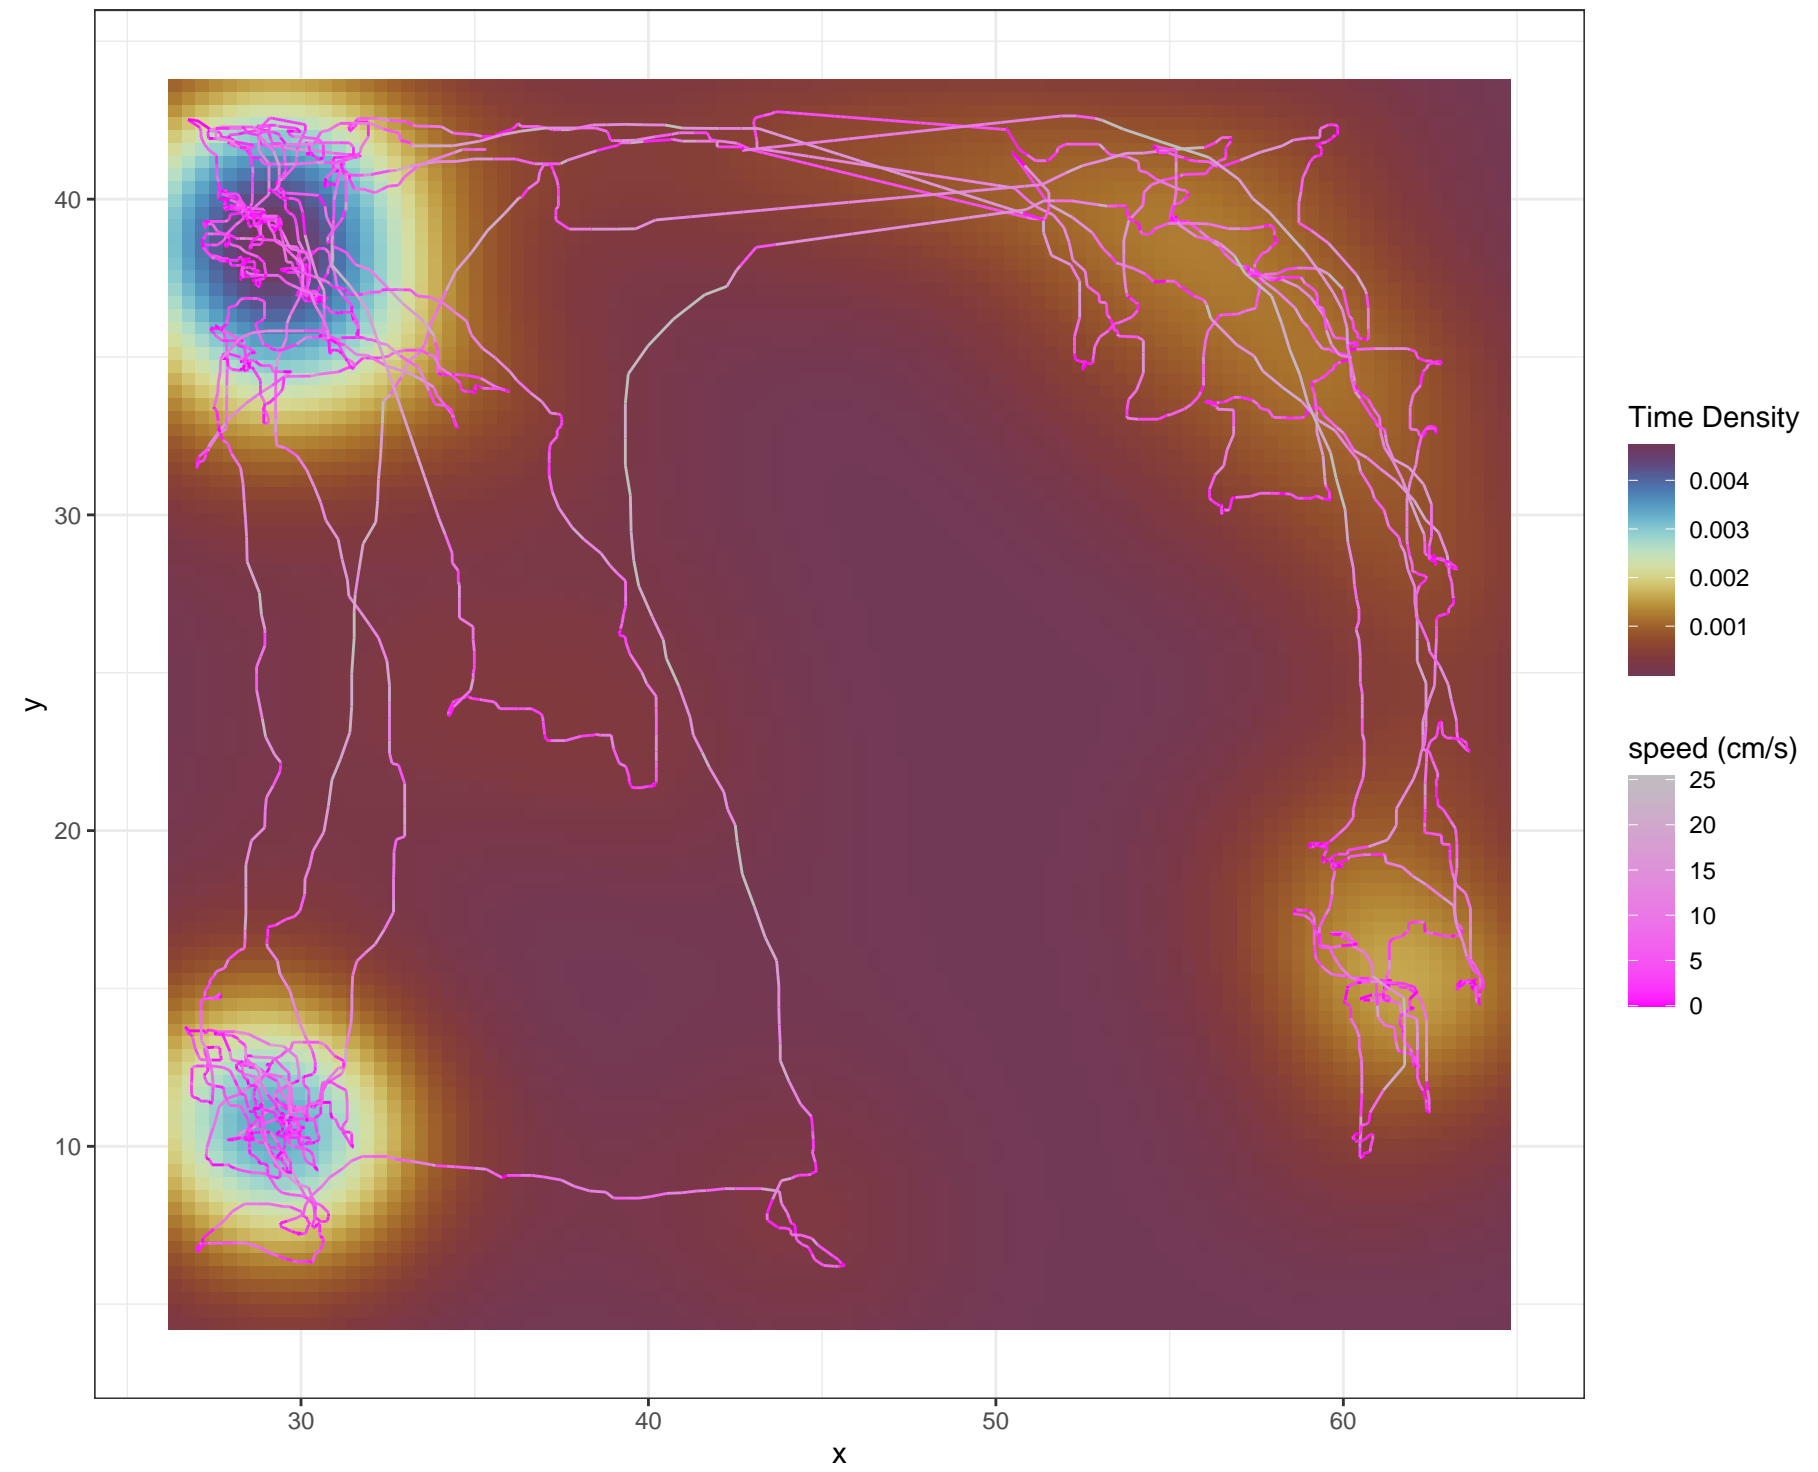

Occiput Maus\_35E-20\_LED1\_MAH00338DLC\_resnet50\_OpenFieldDec23shuffle1\_600000\_filtered.csv

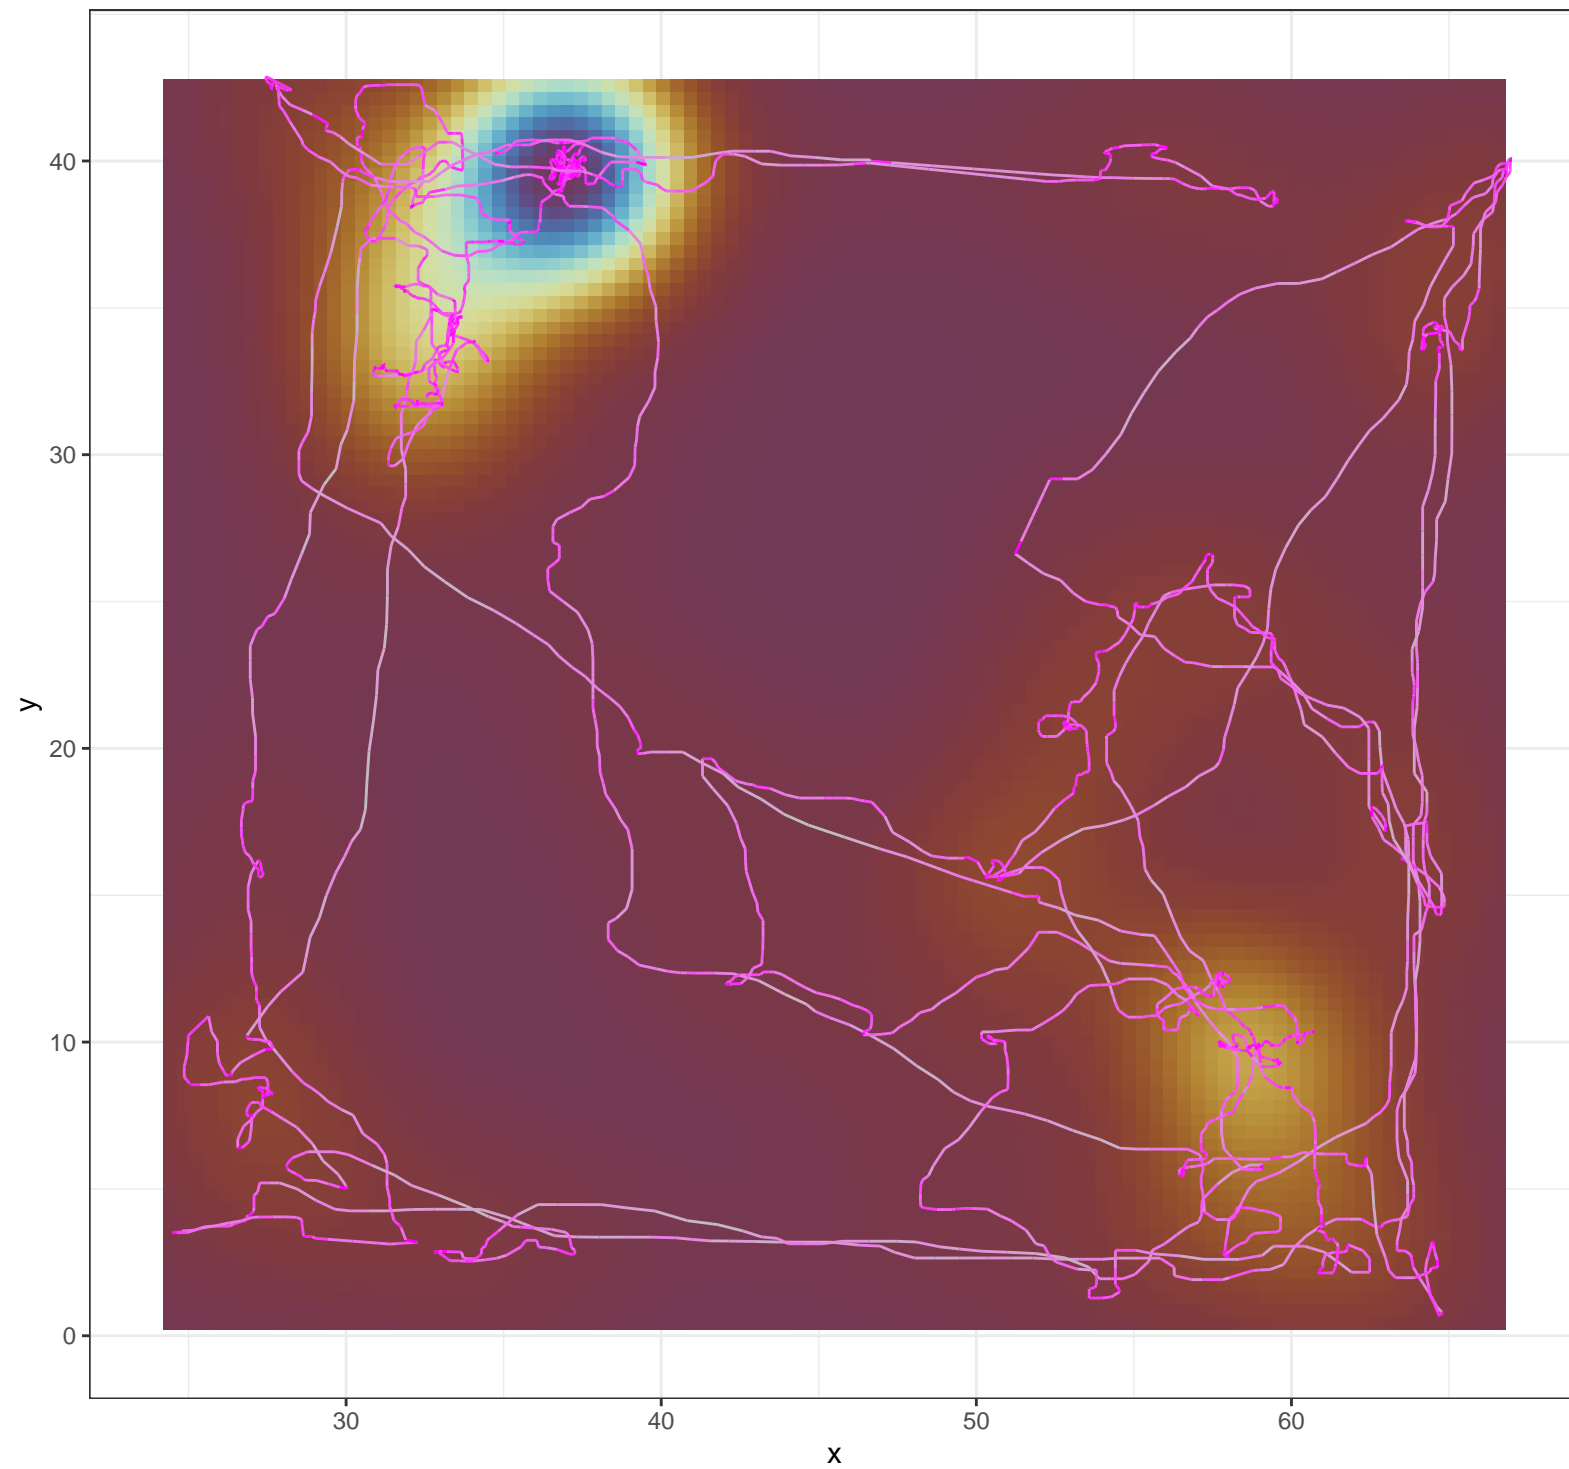

Occiput Maus\_35E-20\_LED1\_MAH00338DLC\_resnet50\_OpenFieldDec23shuffle1\_600000\_filtered.csv

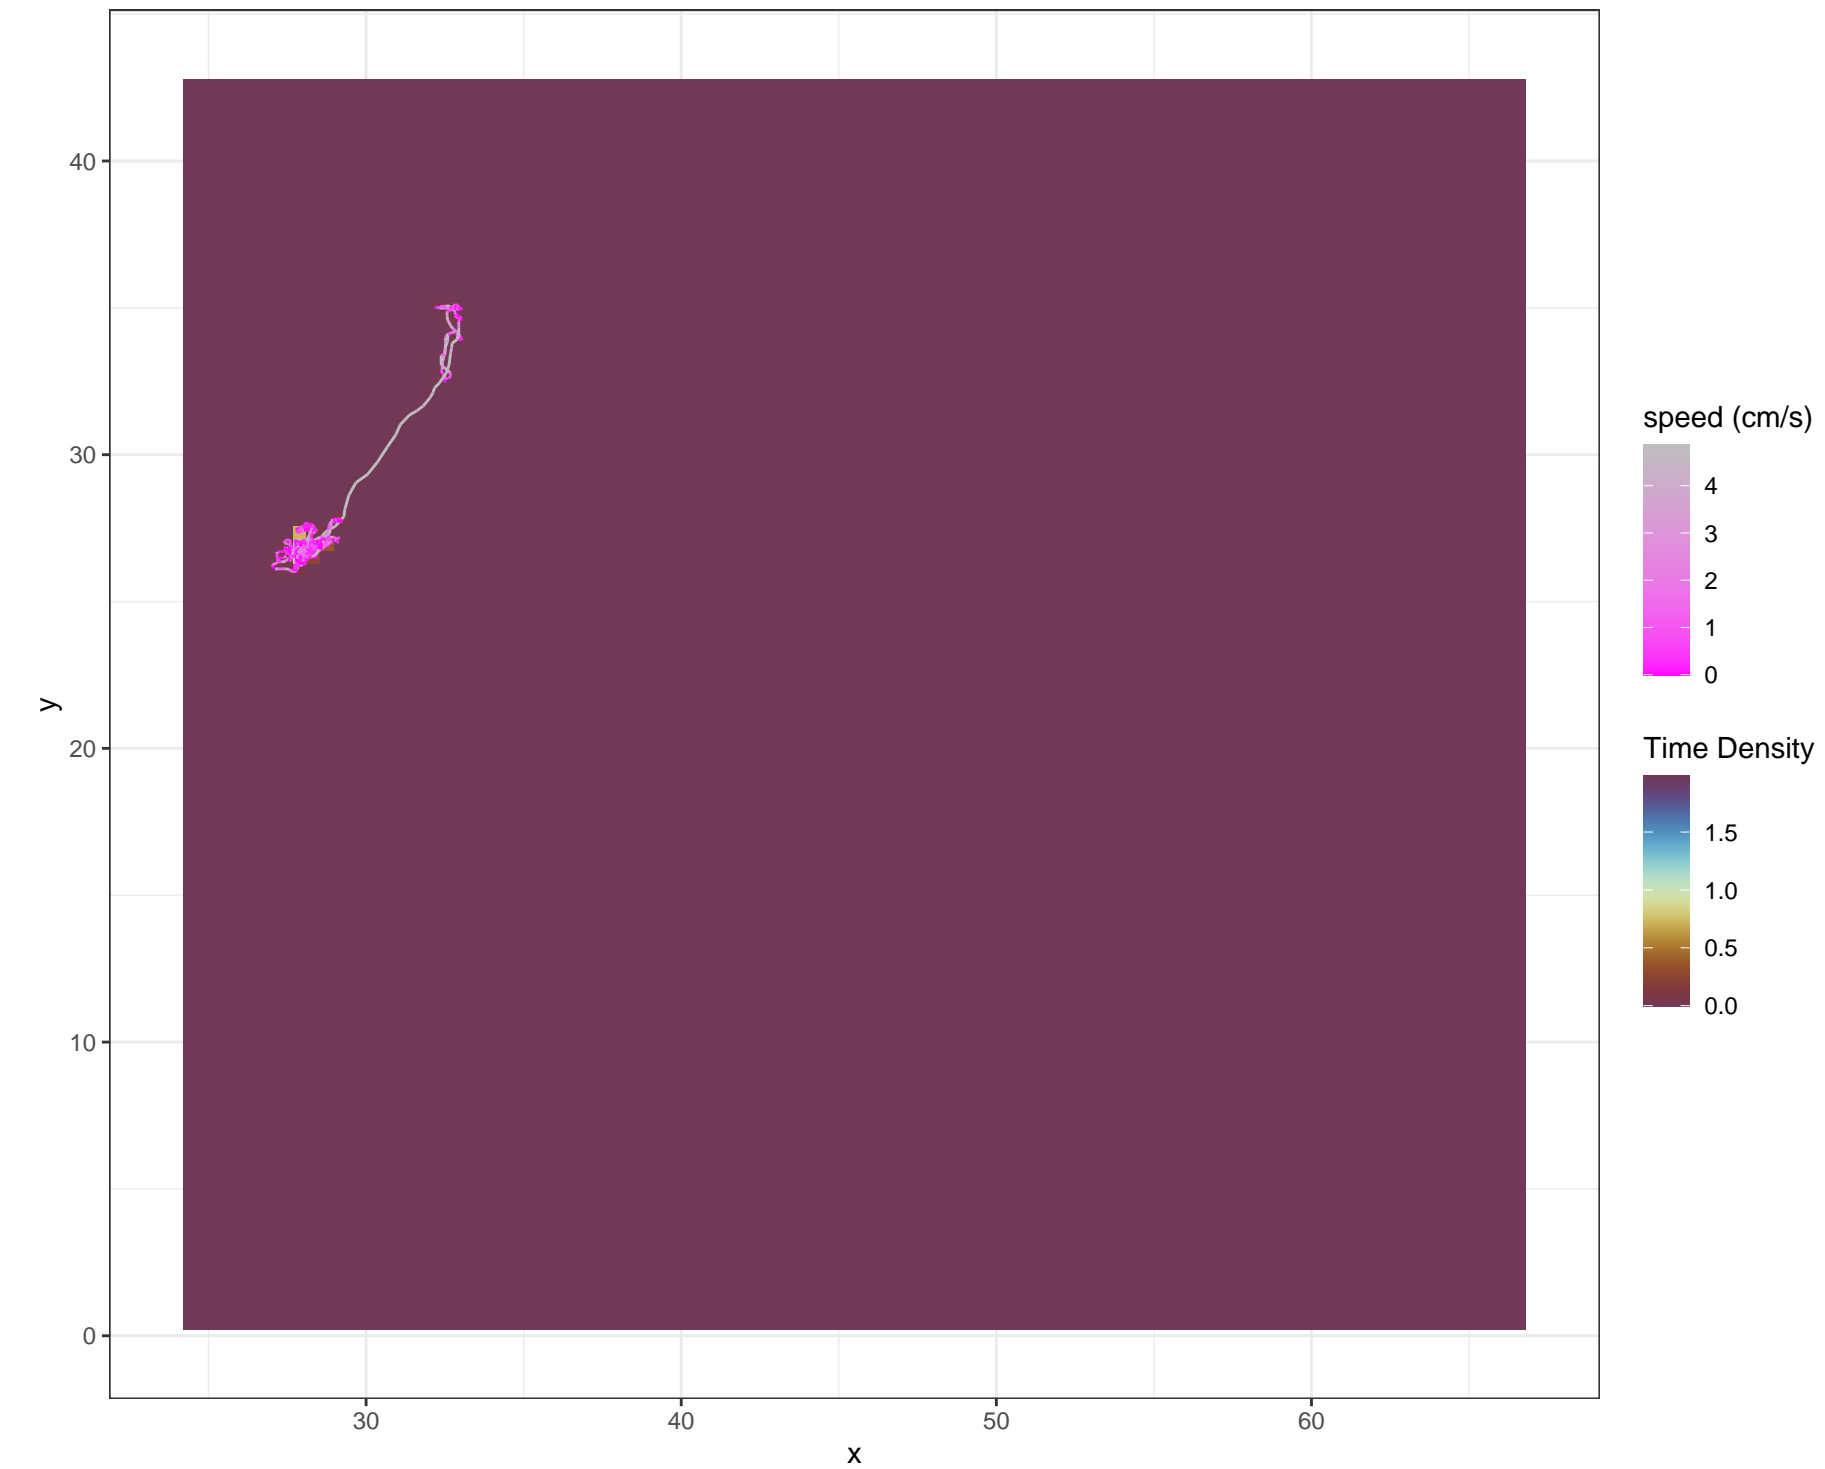

Occiput OF\_top\_Opto\_04-LED1DLC\_resnet50\_OpenFieldDec23shuffle1\_600000\_filtered.csv

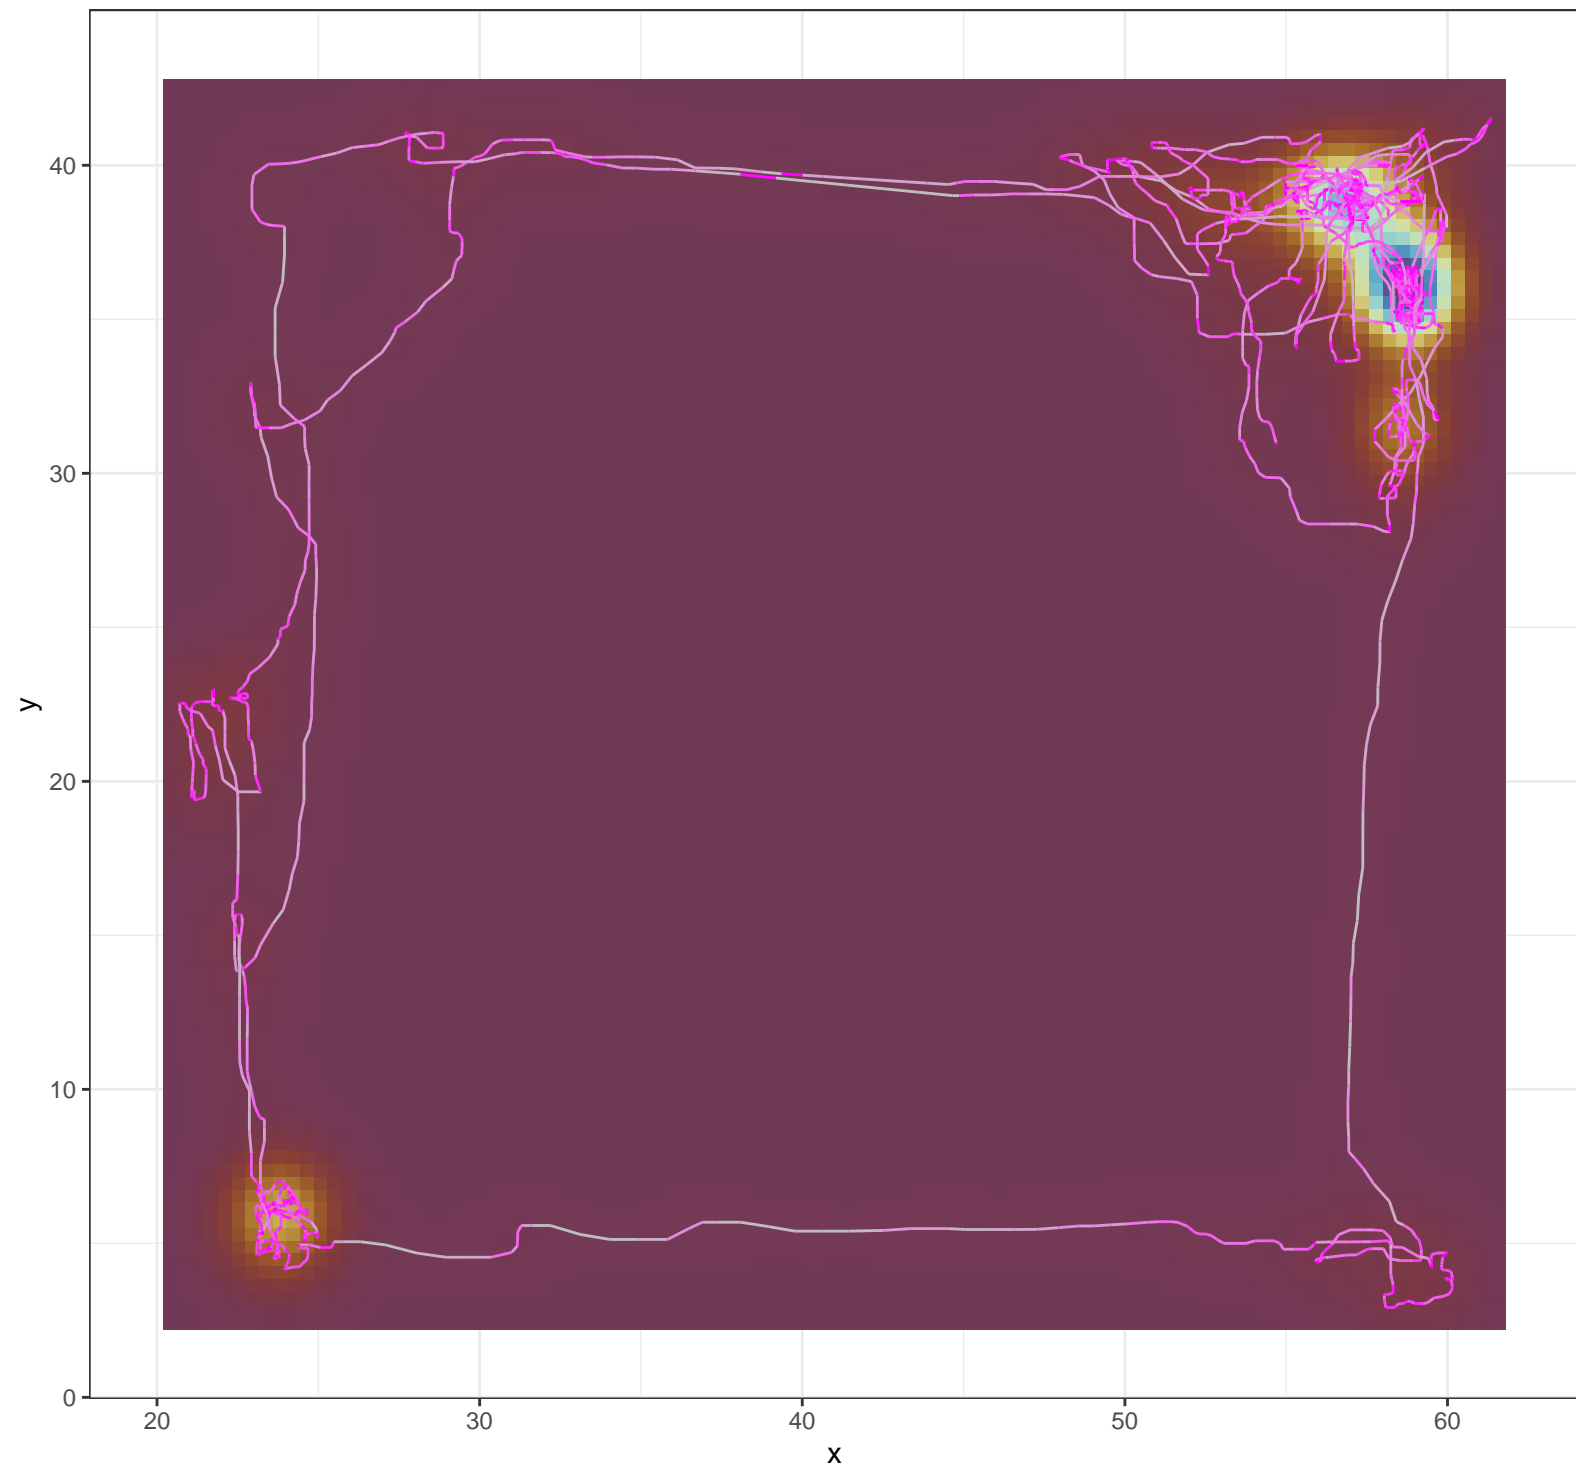

Occiput OF\_top\_Opto\_04-LED1DLC\_resnet50\_OpenFieldDec23shuffle1\_600000\_filtered.csv

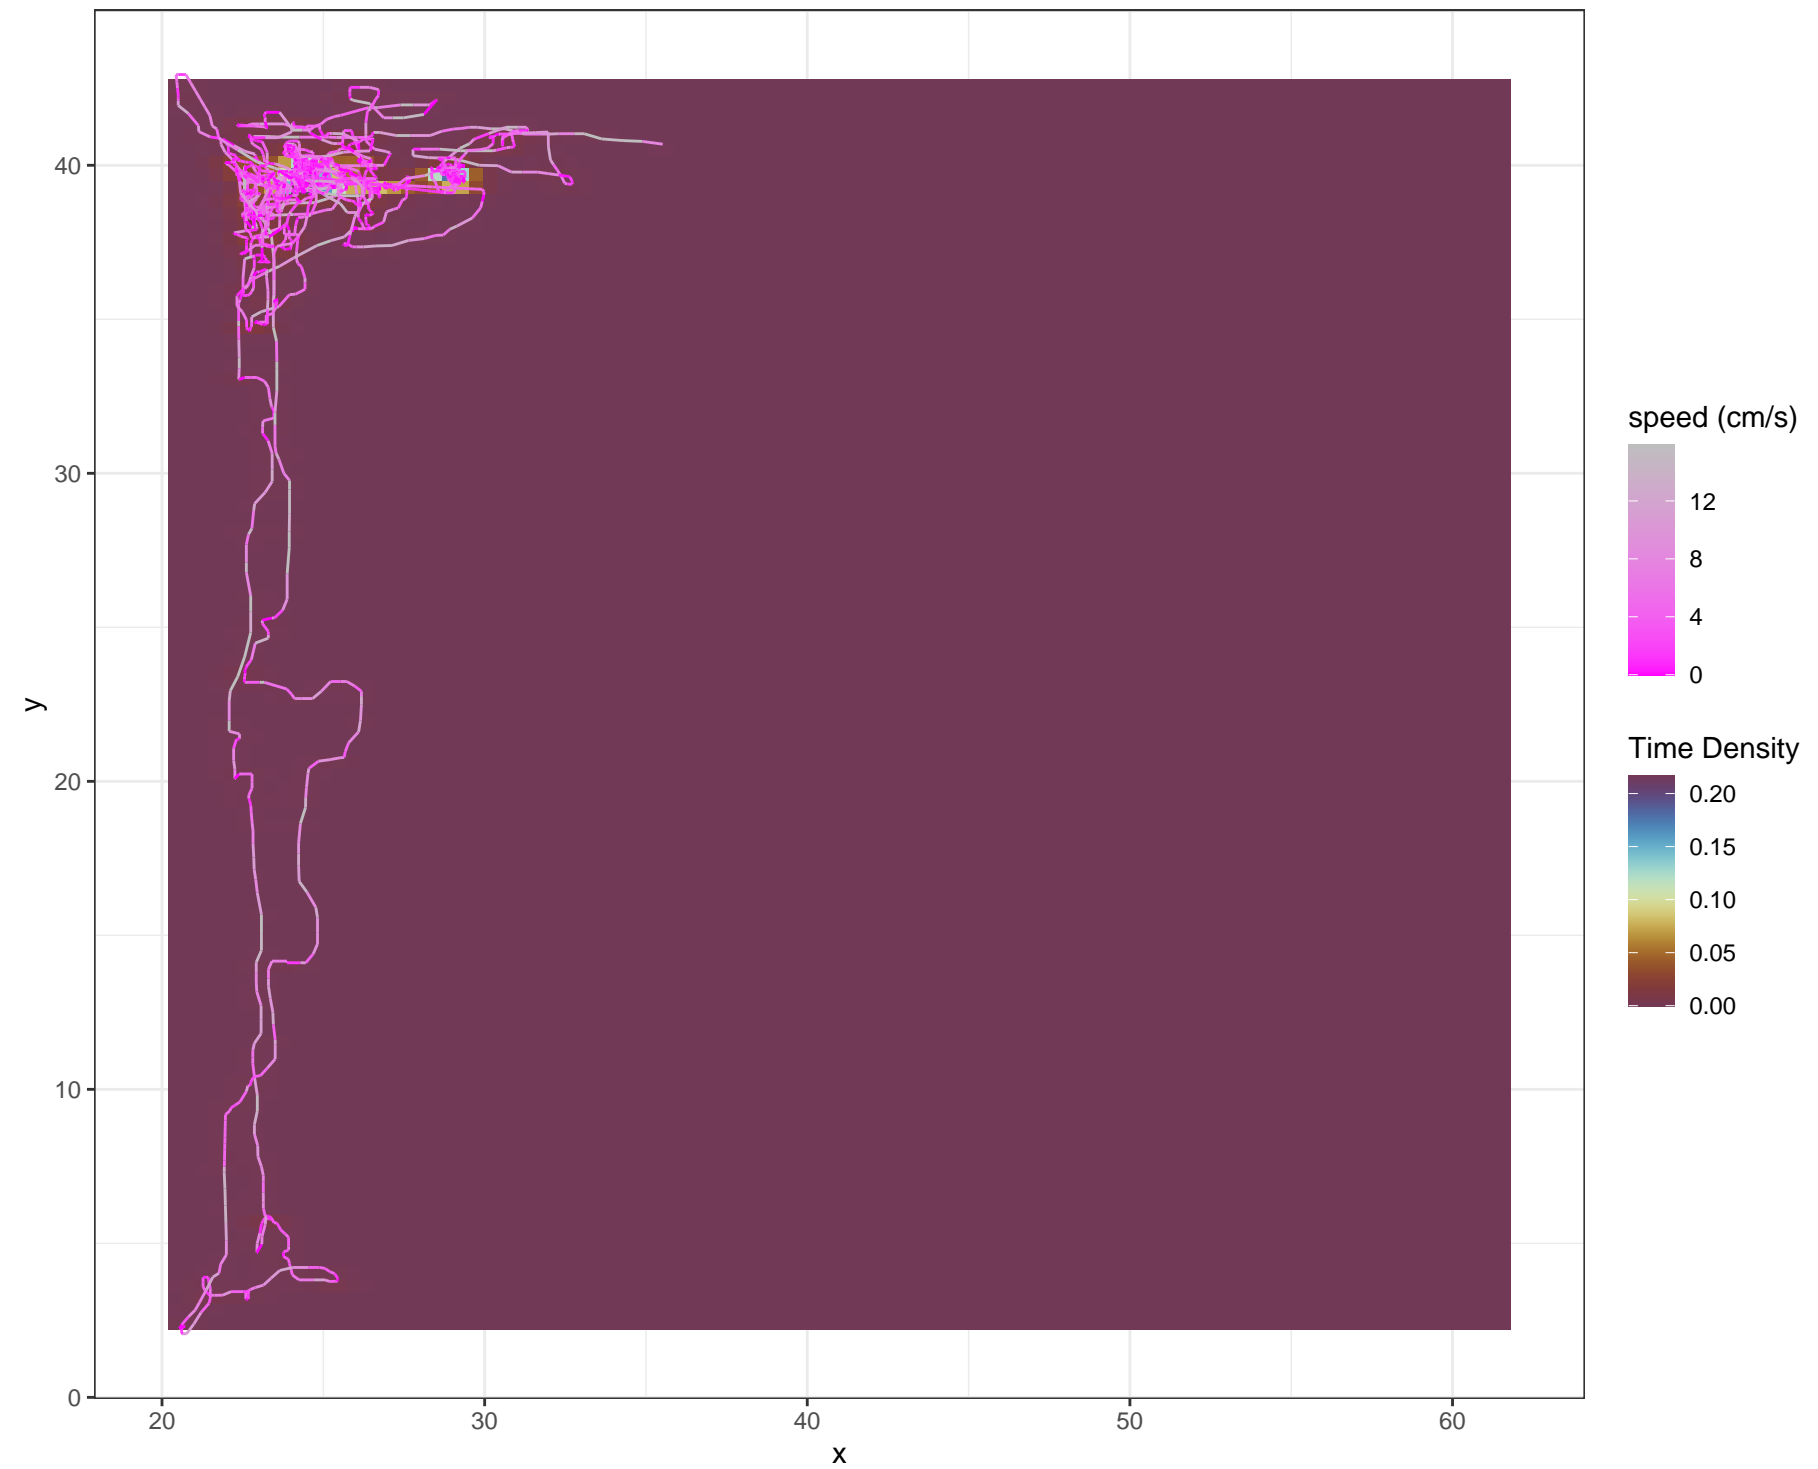

Occiput OF\_top\_Opto\_10-LED1DLC\_resnet50\_OpenFieldDec23shuffle1\_600000\_filtered.csv

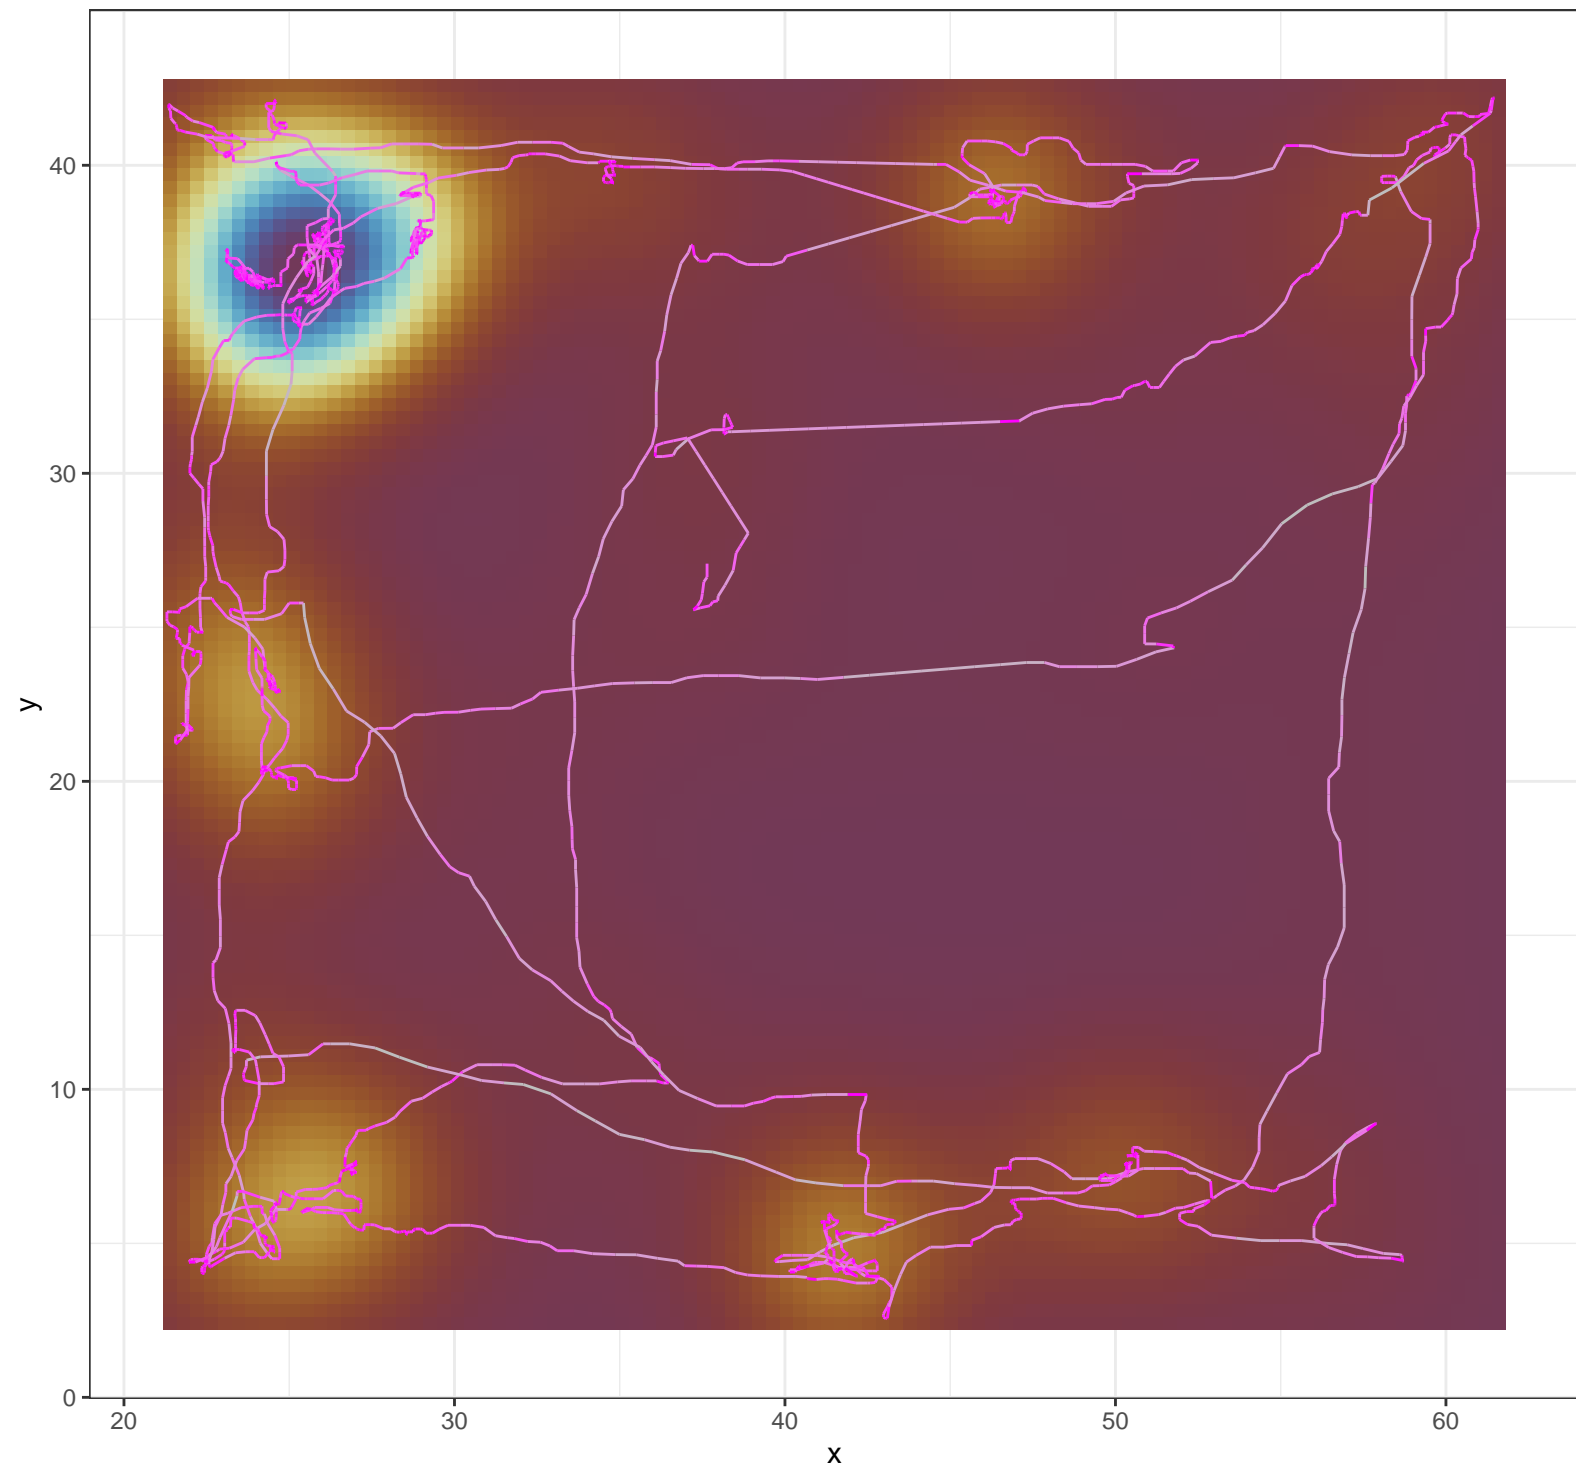

Occiput OF\_top\_Opto\_10-LED1DLC\_resnet50\_OpenFieldDec23shuffle1\_600000\_filtered.csv

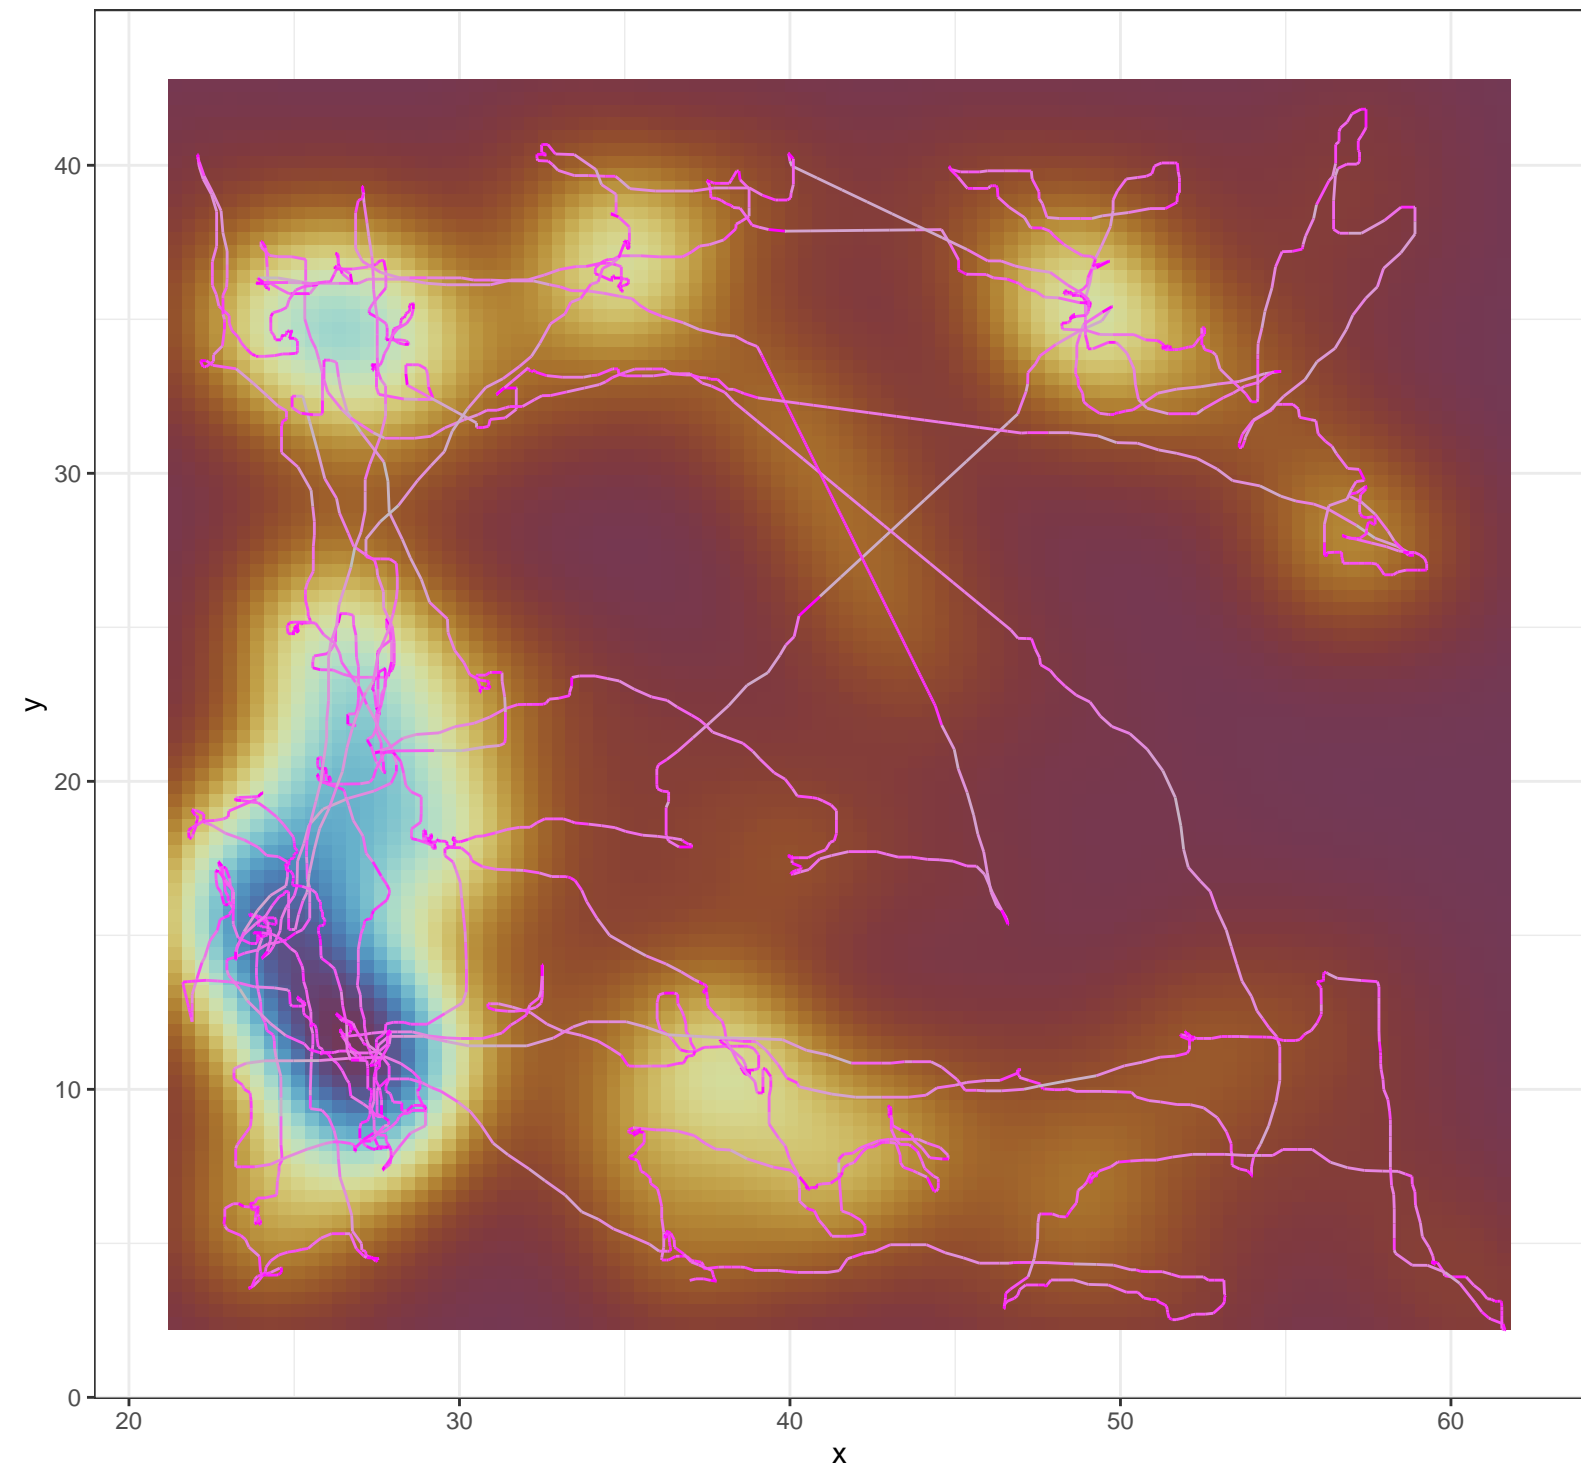



Occiput OF\_top\_Opto\_11-LED1DLC\_resnet50\_OpenFieldDec23shuffle1\_600000\_filtered.csv

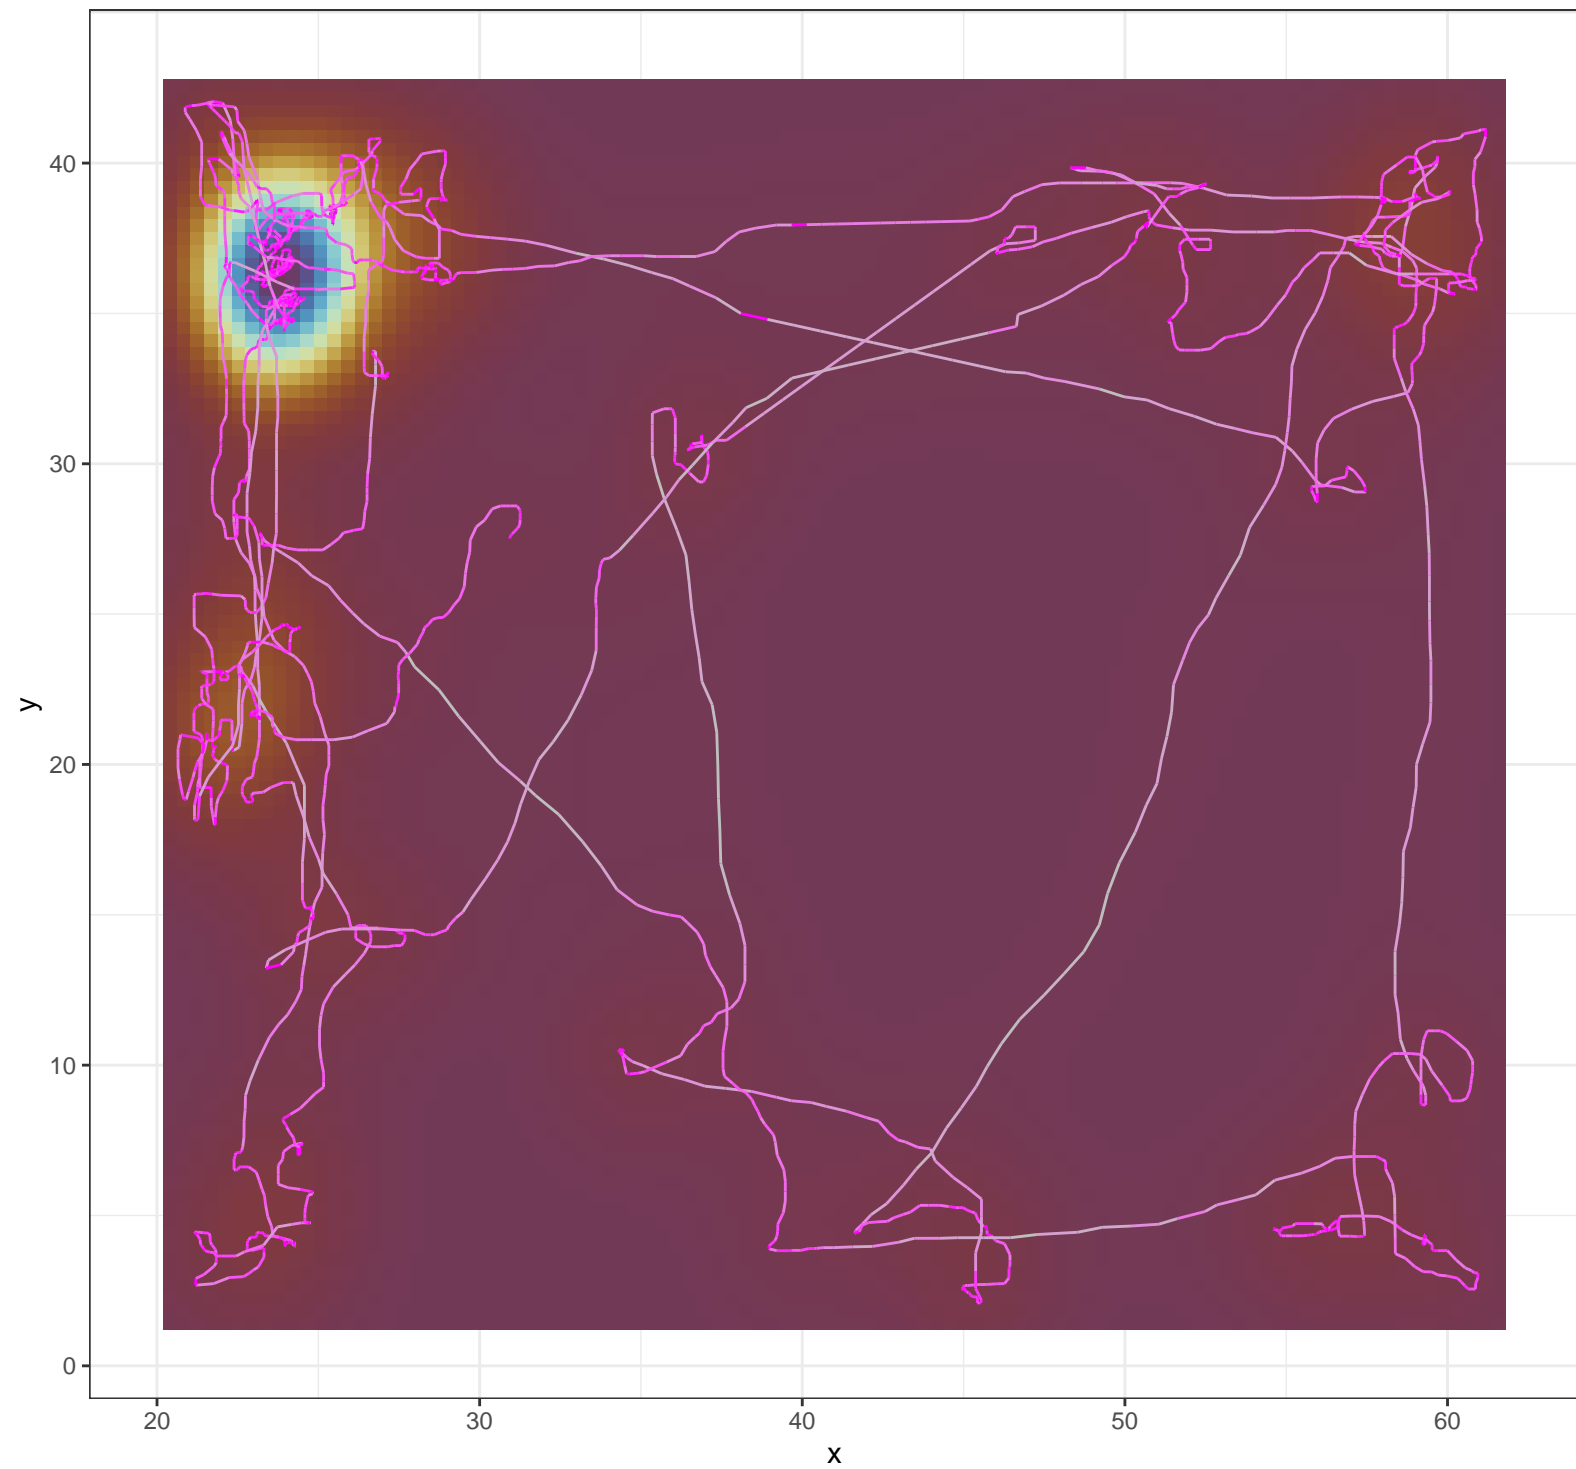

Occiput OF\_top\_Opto\_11-LED1DLC\_resnet50\_OpenFieldDec23shuffle1\_600000\_filtered.csv

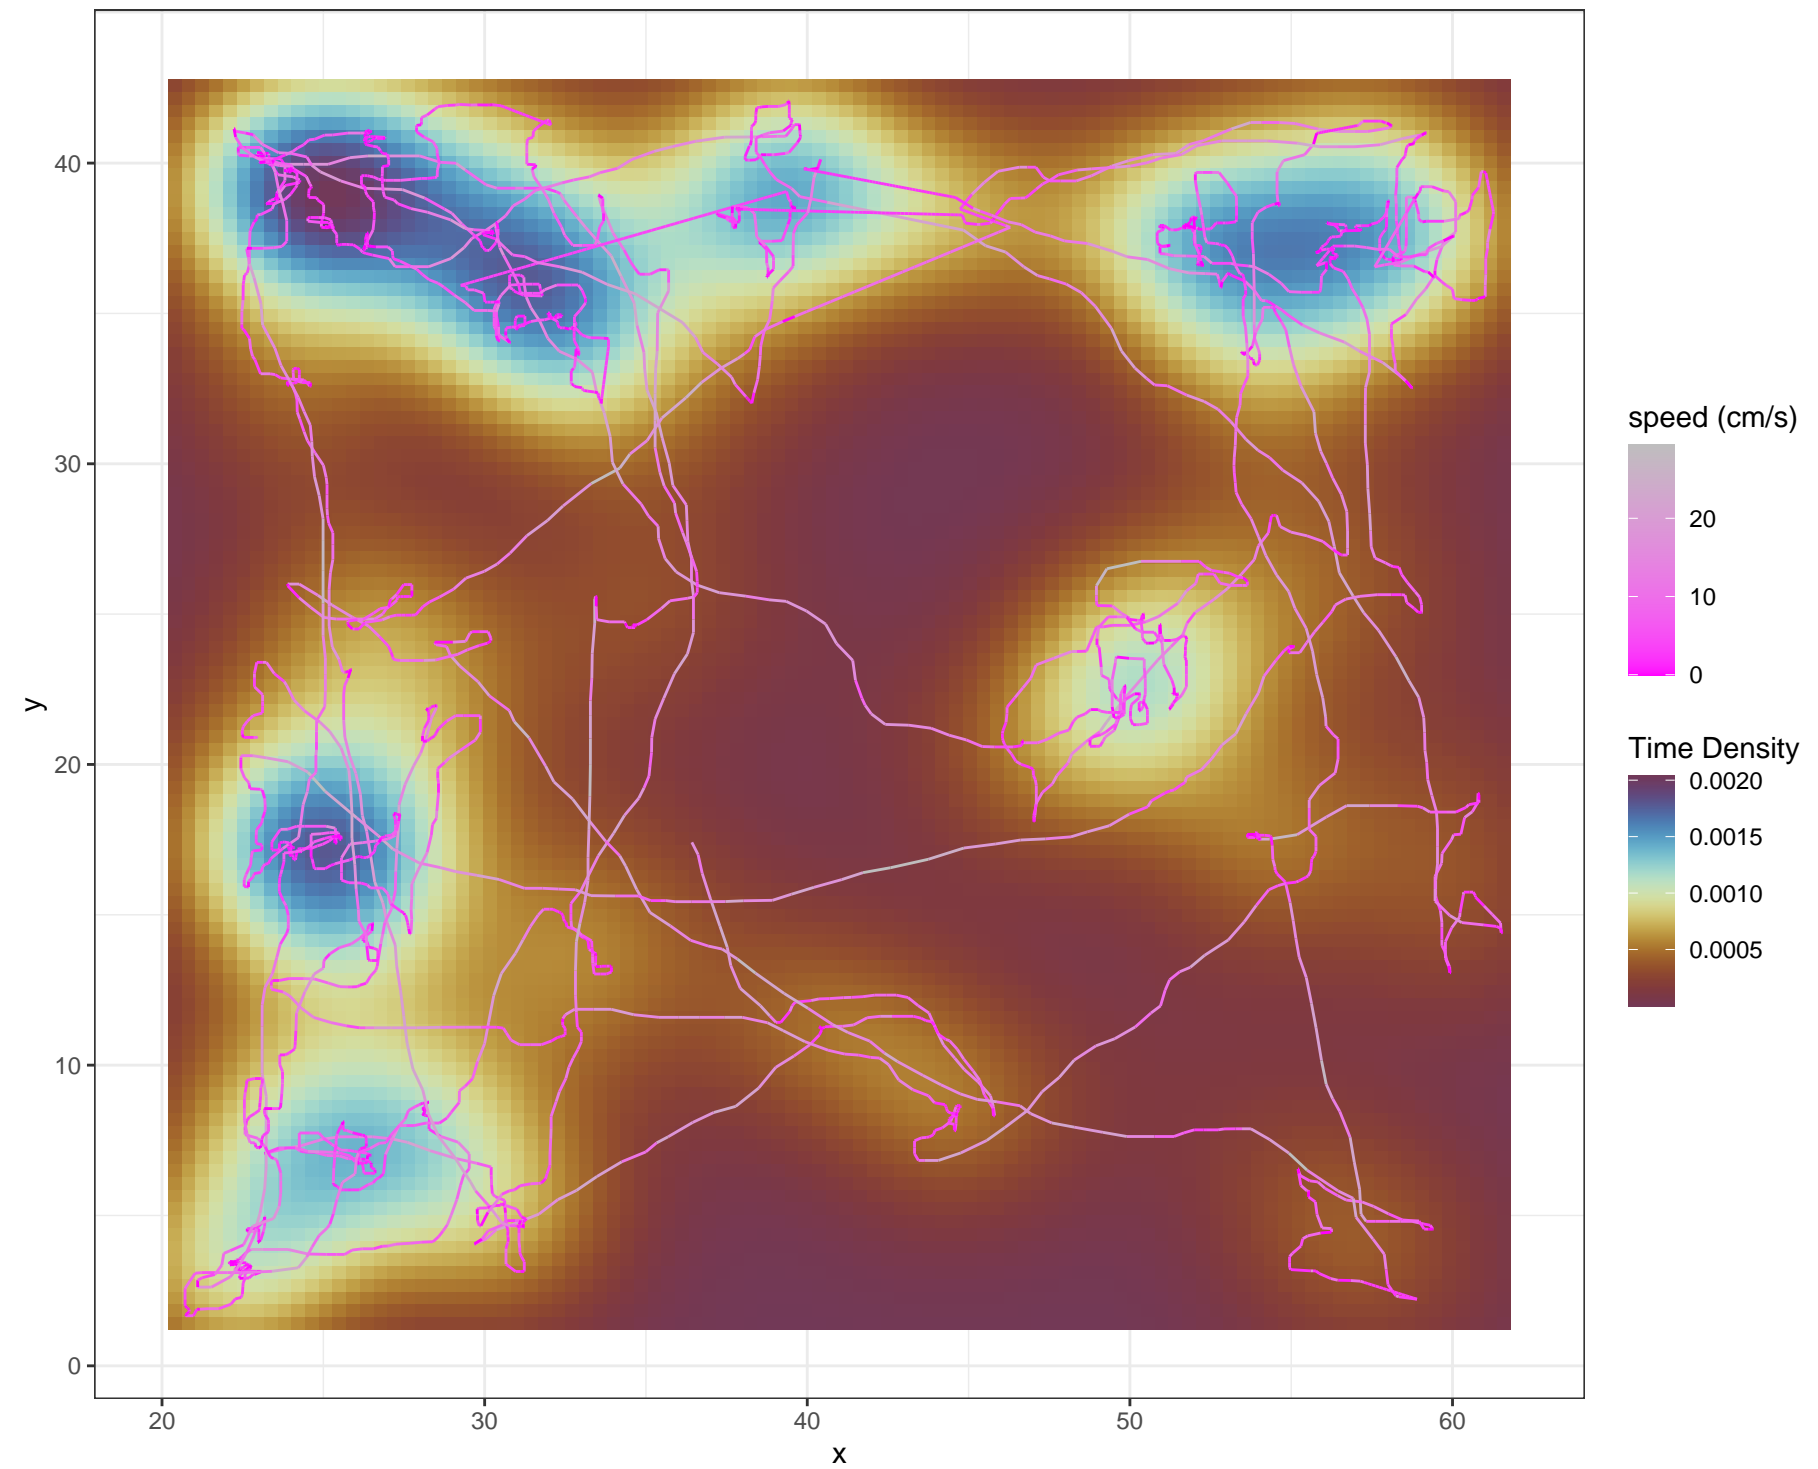

Occiput OF\_top\_Opto\_15-LED1DLC\_resnet50\_OpenFieldDec23shuffle1\_600000\_filtered.csv

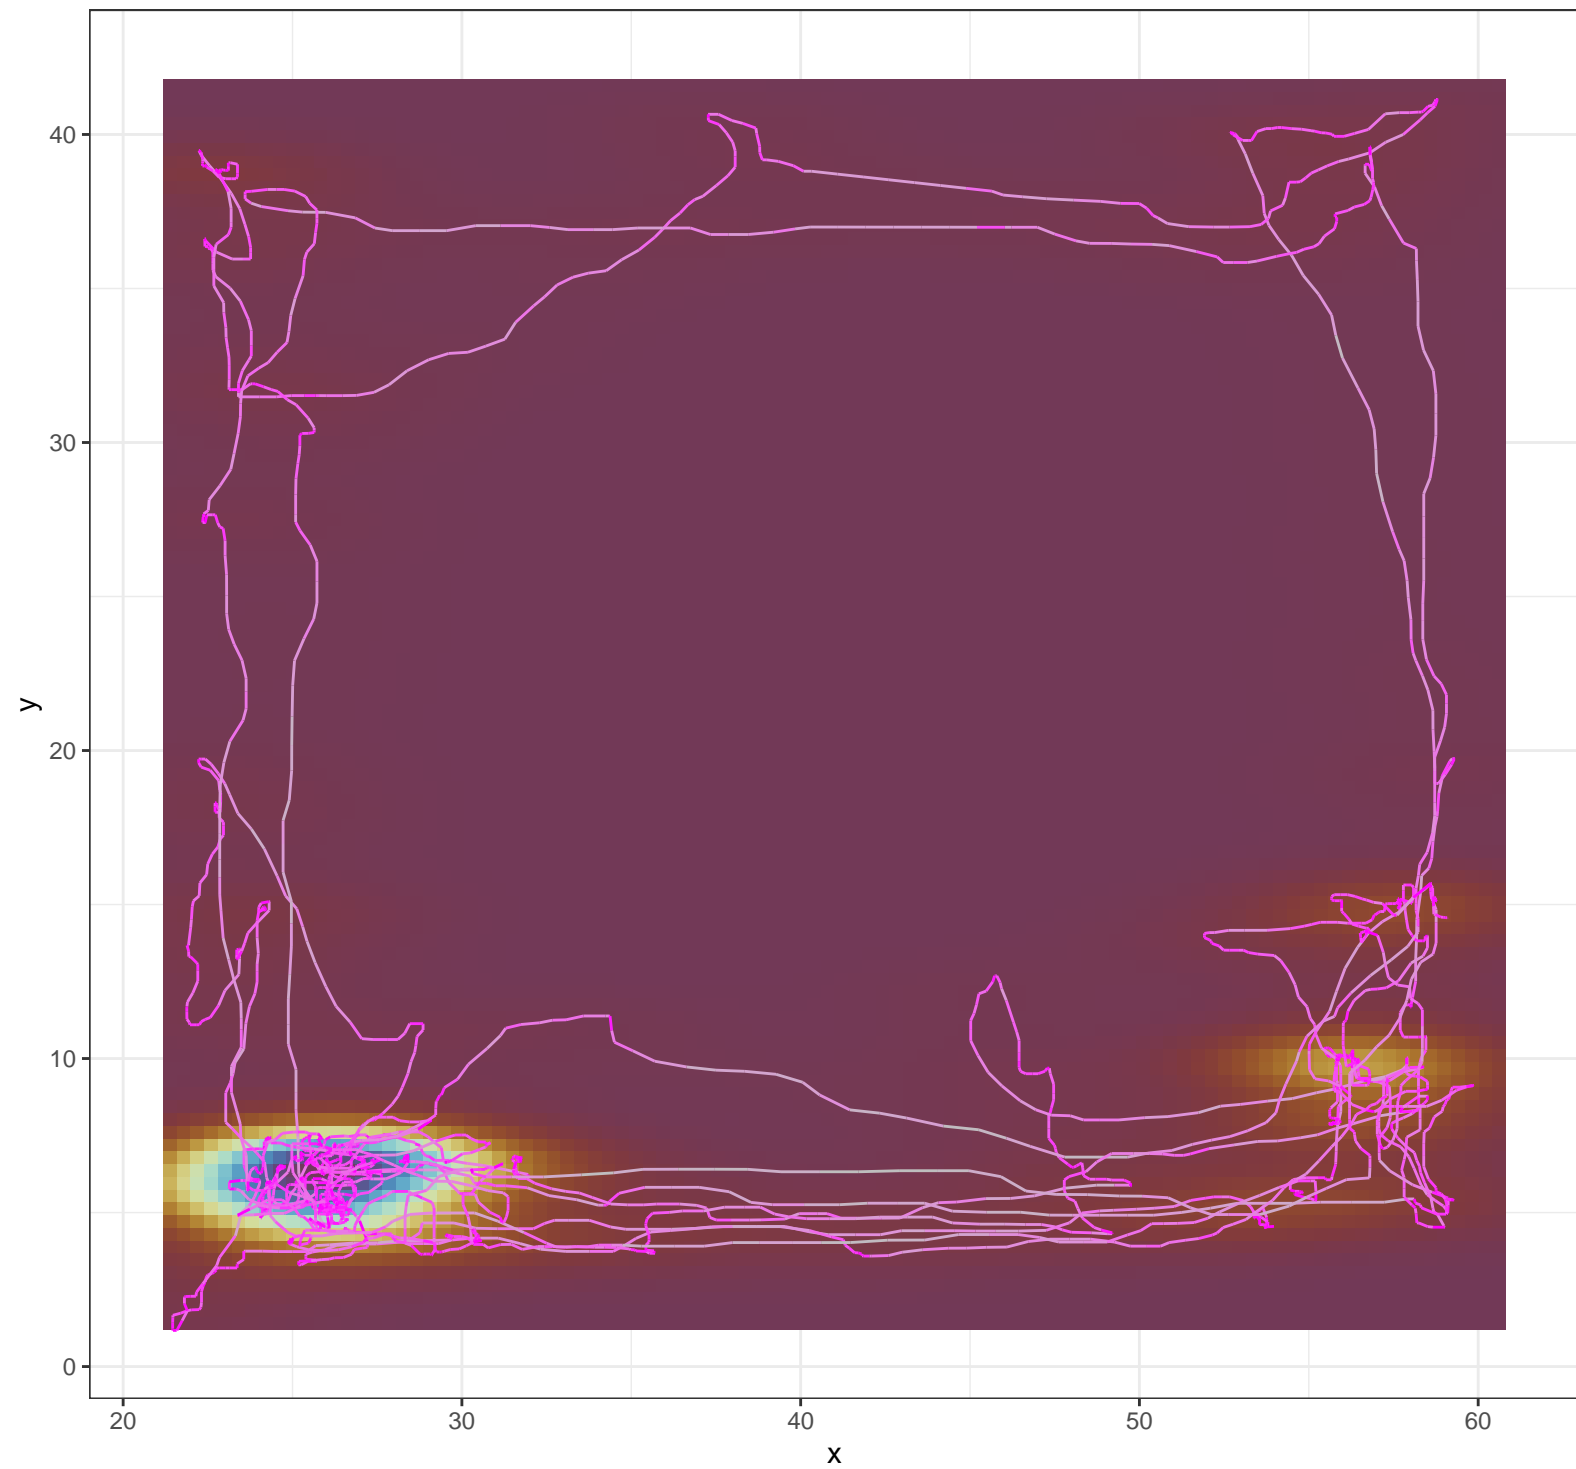

Occiput OF\_top\_Opto\_15-LED1DLC\_resnet50\_OpenFieldDec23shuffle1\_600000\_filtered.csv

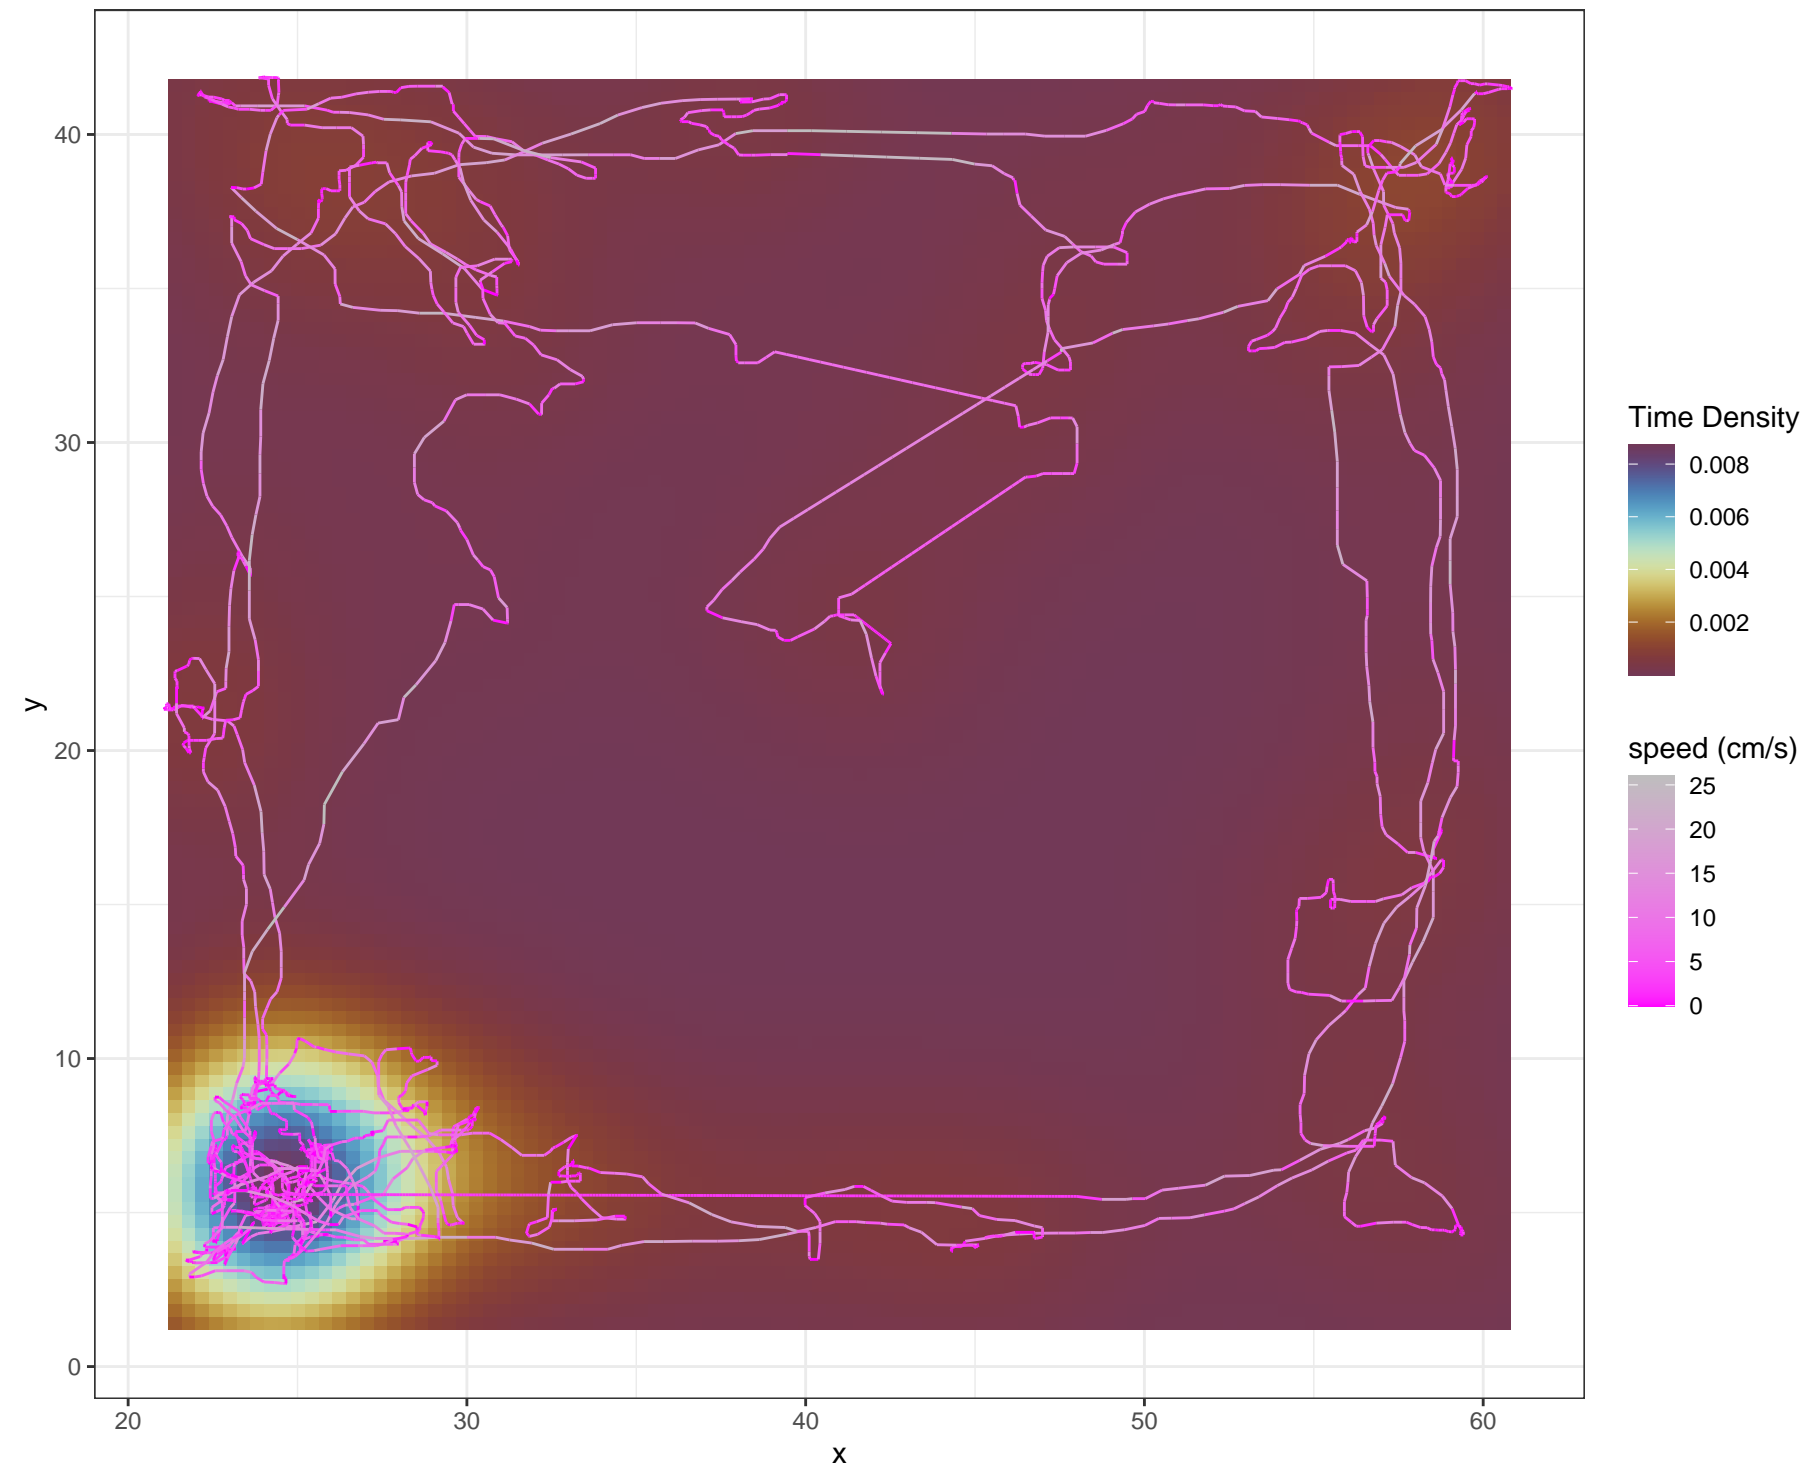

Occiput OF\_top\_Opto\_16-LED1DLC\_resnet50\_OpenFieldDec23shuffle1\_600000\_filtered.csv

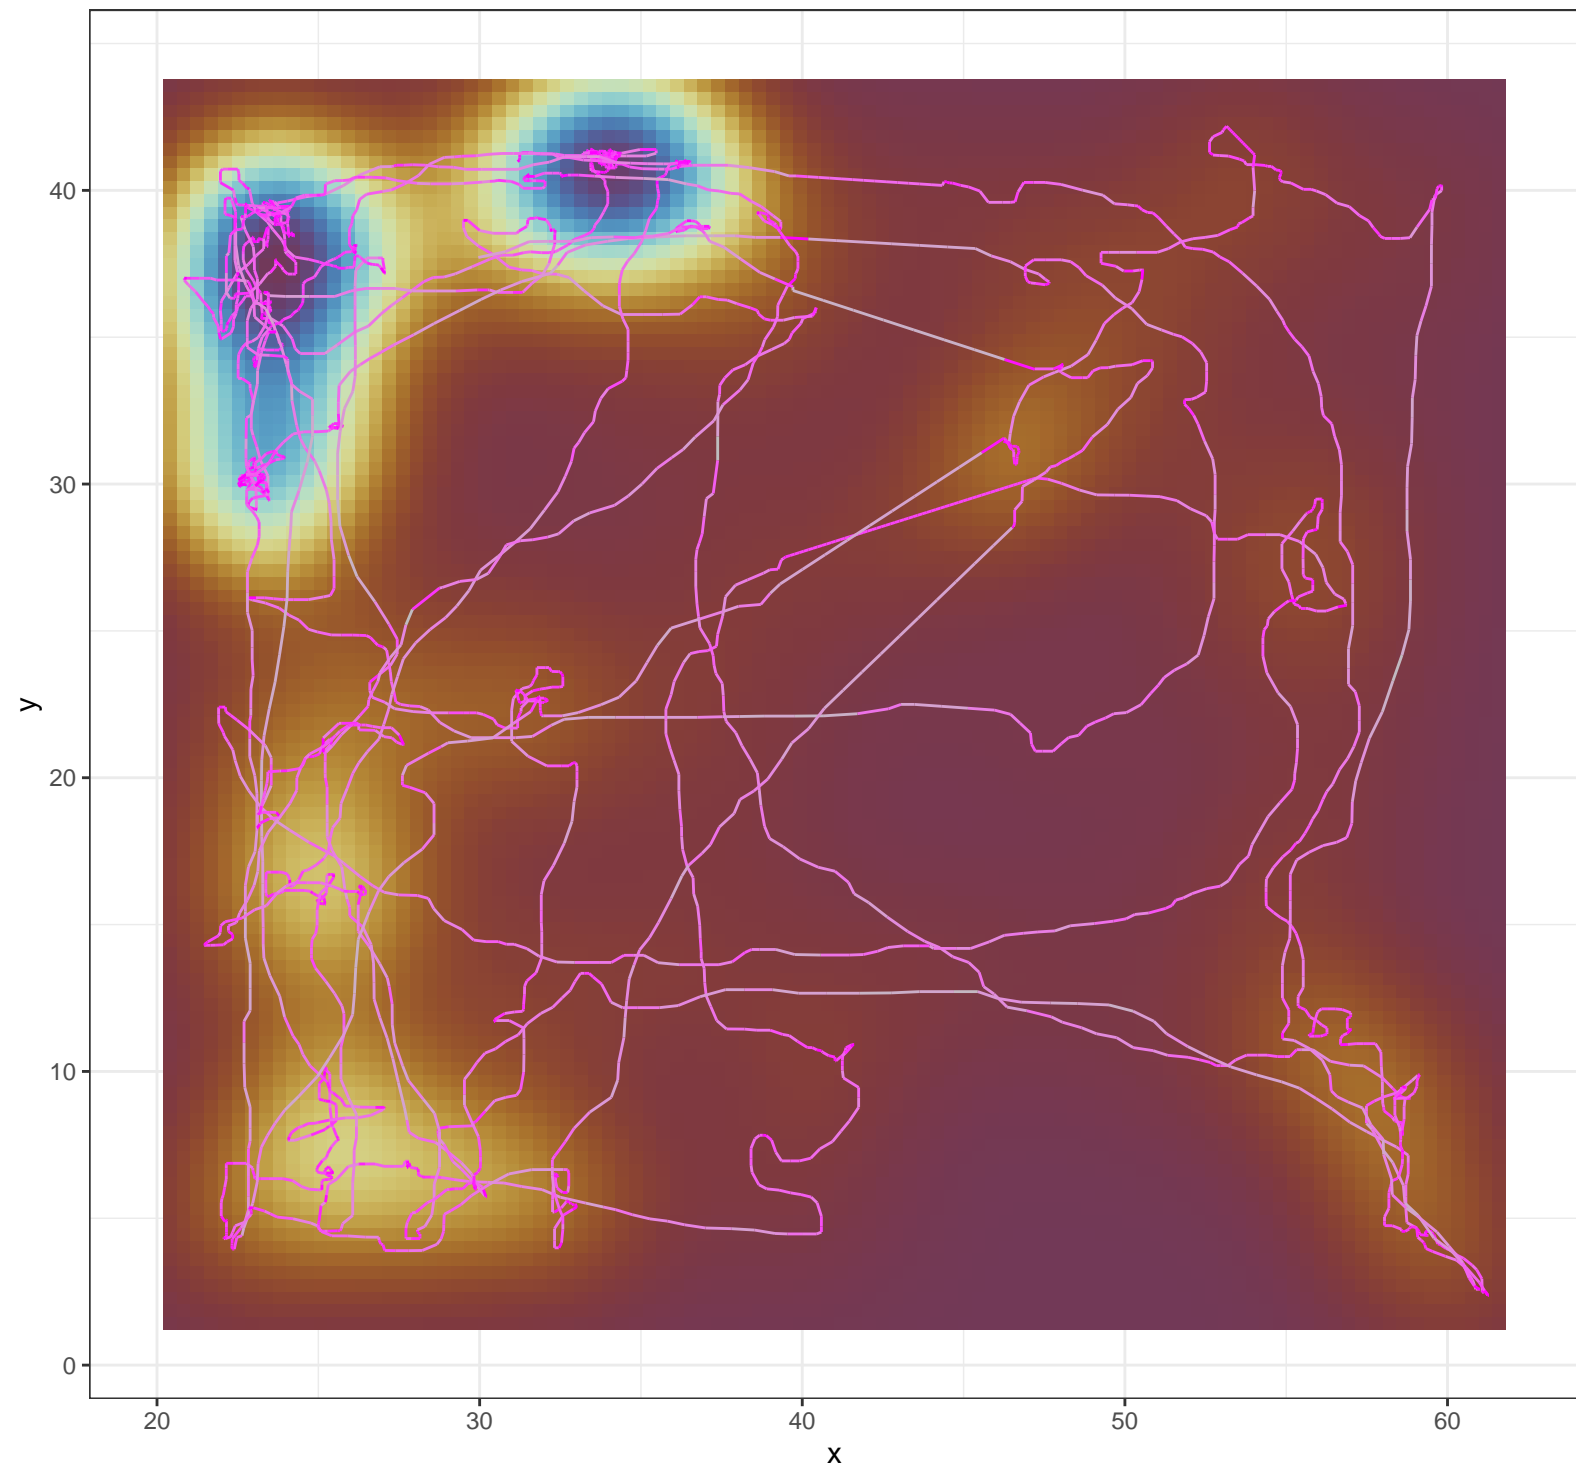

Occiput OF\_top\_Opto\_16-LED1DLC\_resnet50\_OpenFieldDec23shuffle1\_600000\_filtered.csv

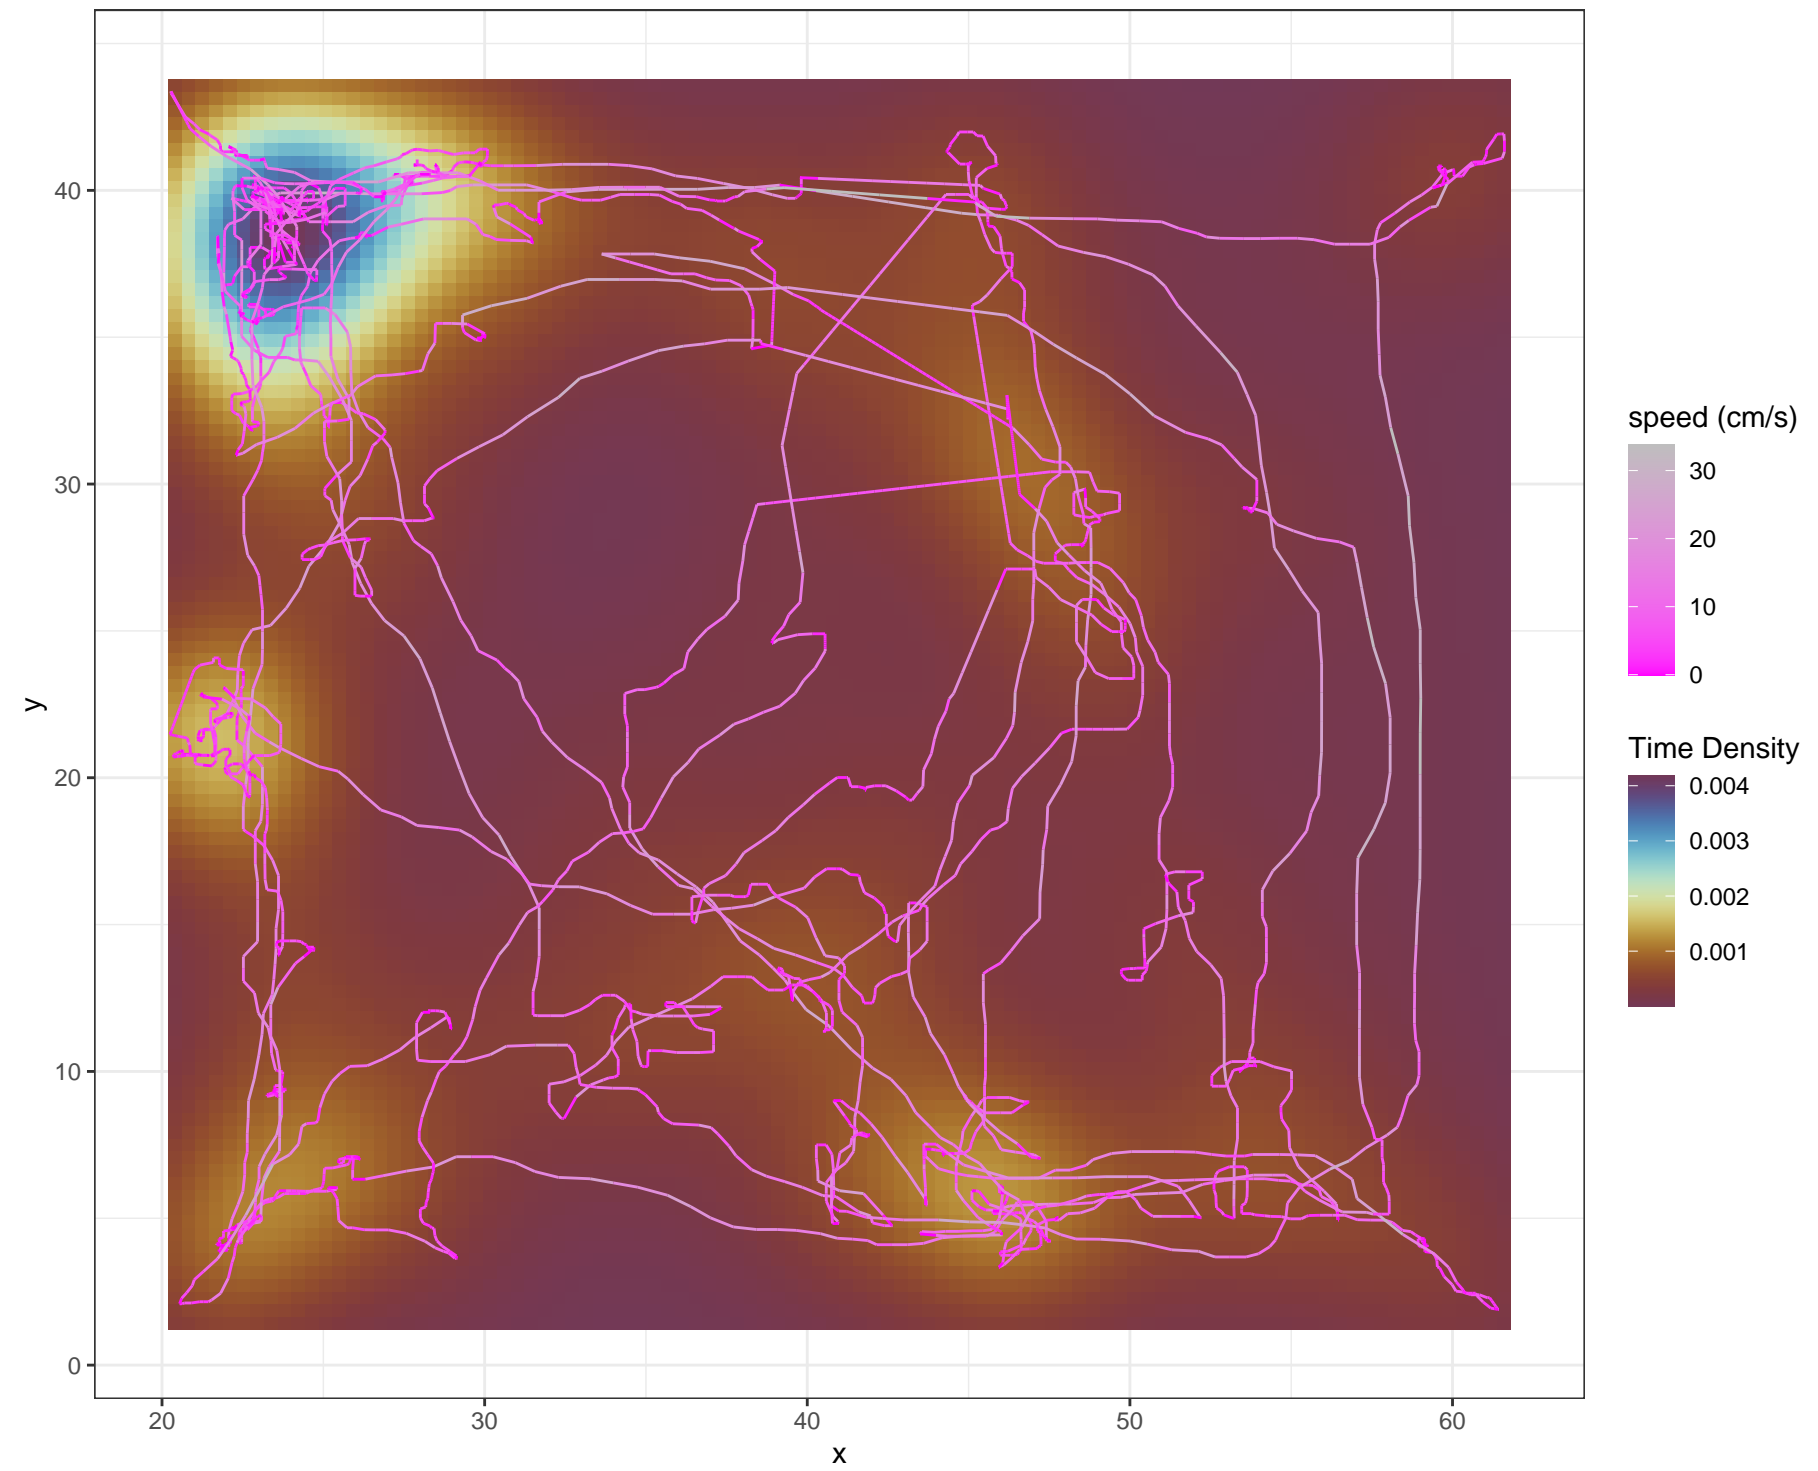

Occiput OF\_top\_Opto\_52-LED1DLC\_resnet50\_OpenFieldDec23shuffle1\_600000\_filtered.csv

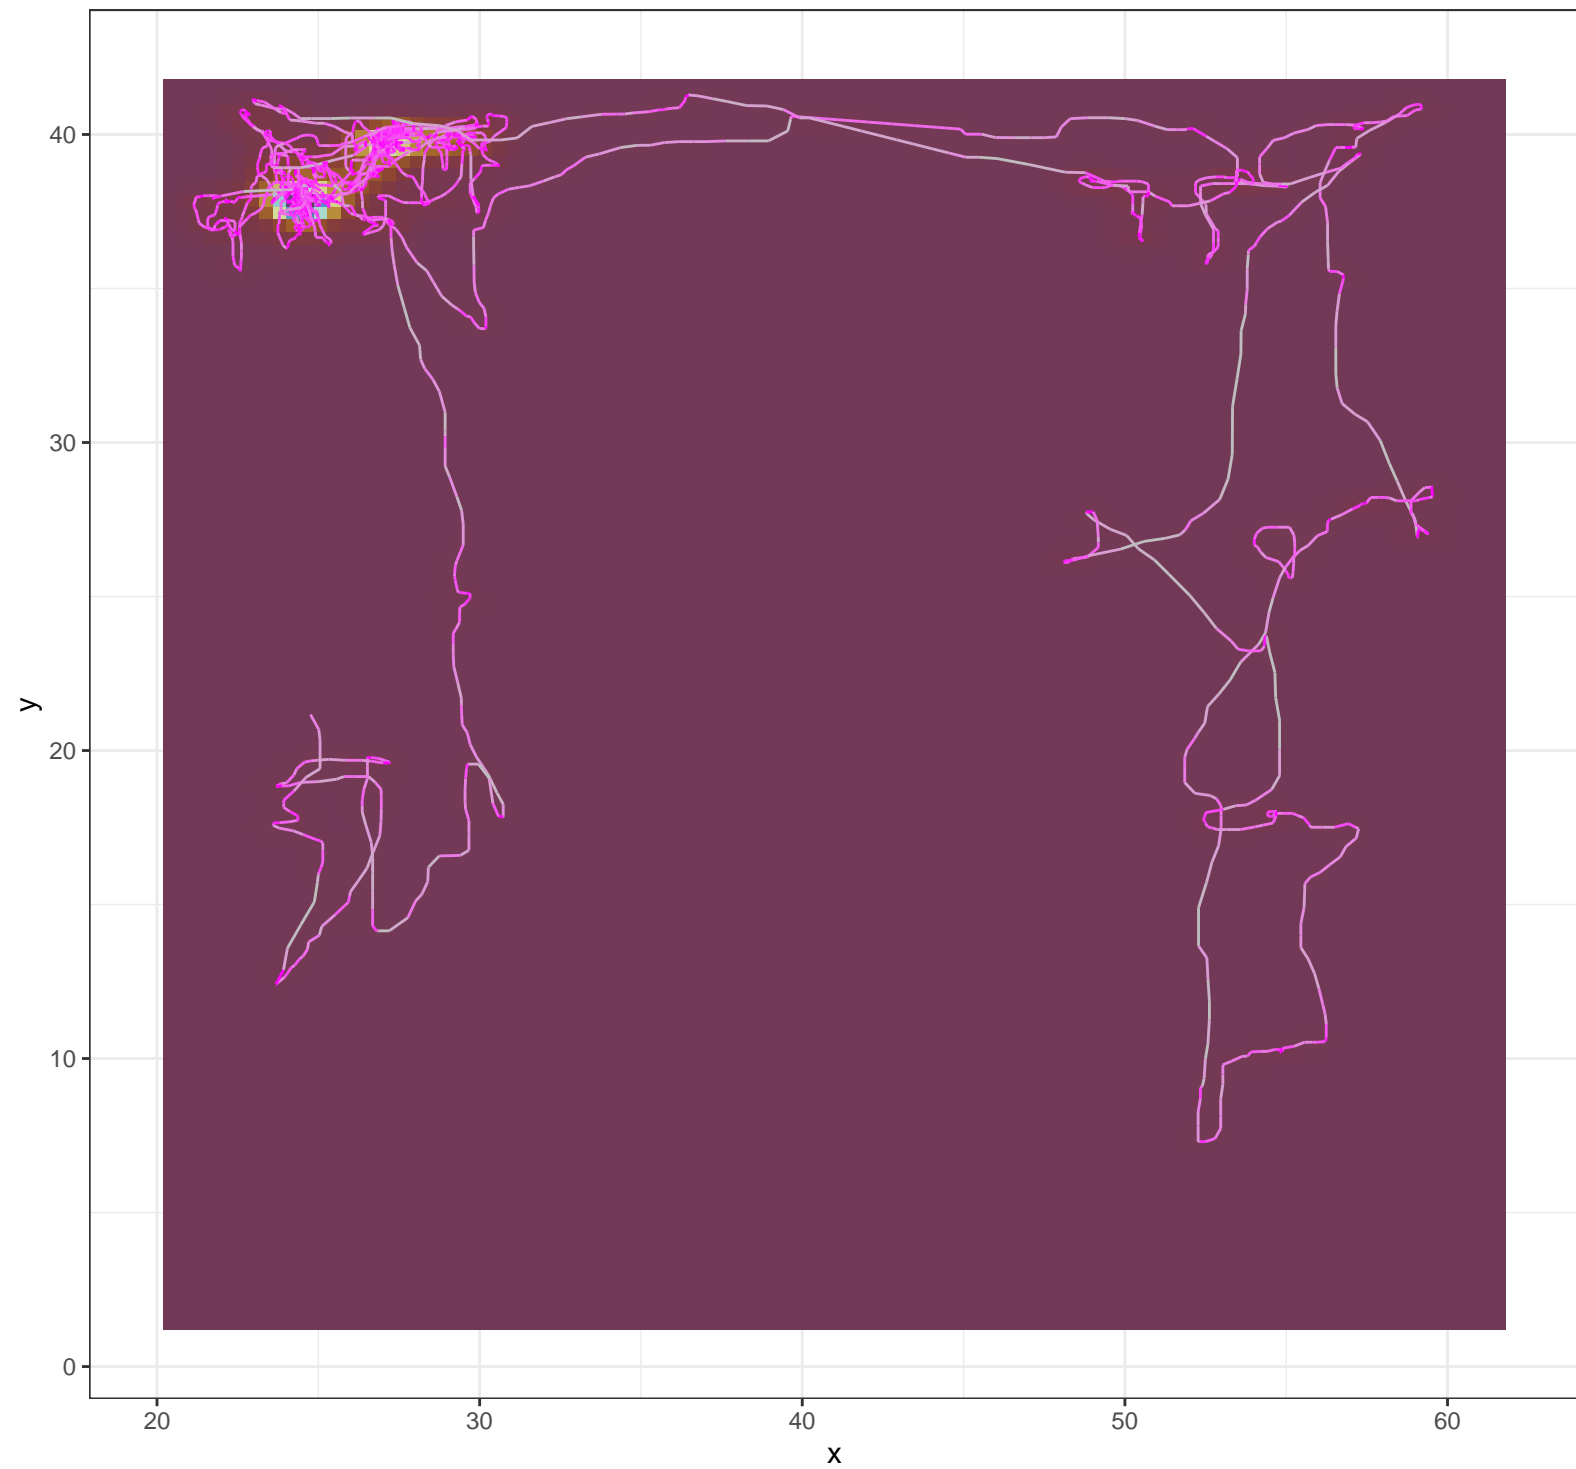

Occiput OF\_top\_Opto\_52-LED1DLC\_resnet50\_OpenFieldDec23shuffle1\_600000\_filtered.csv

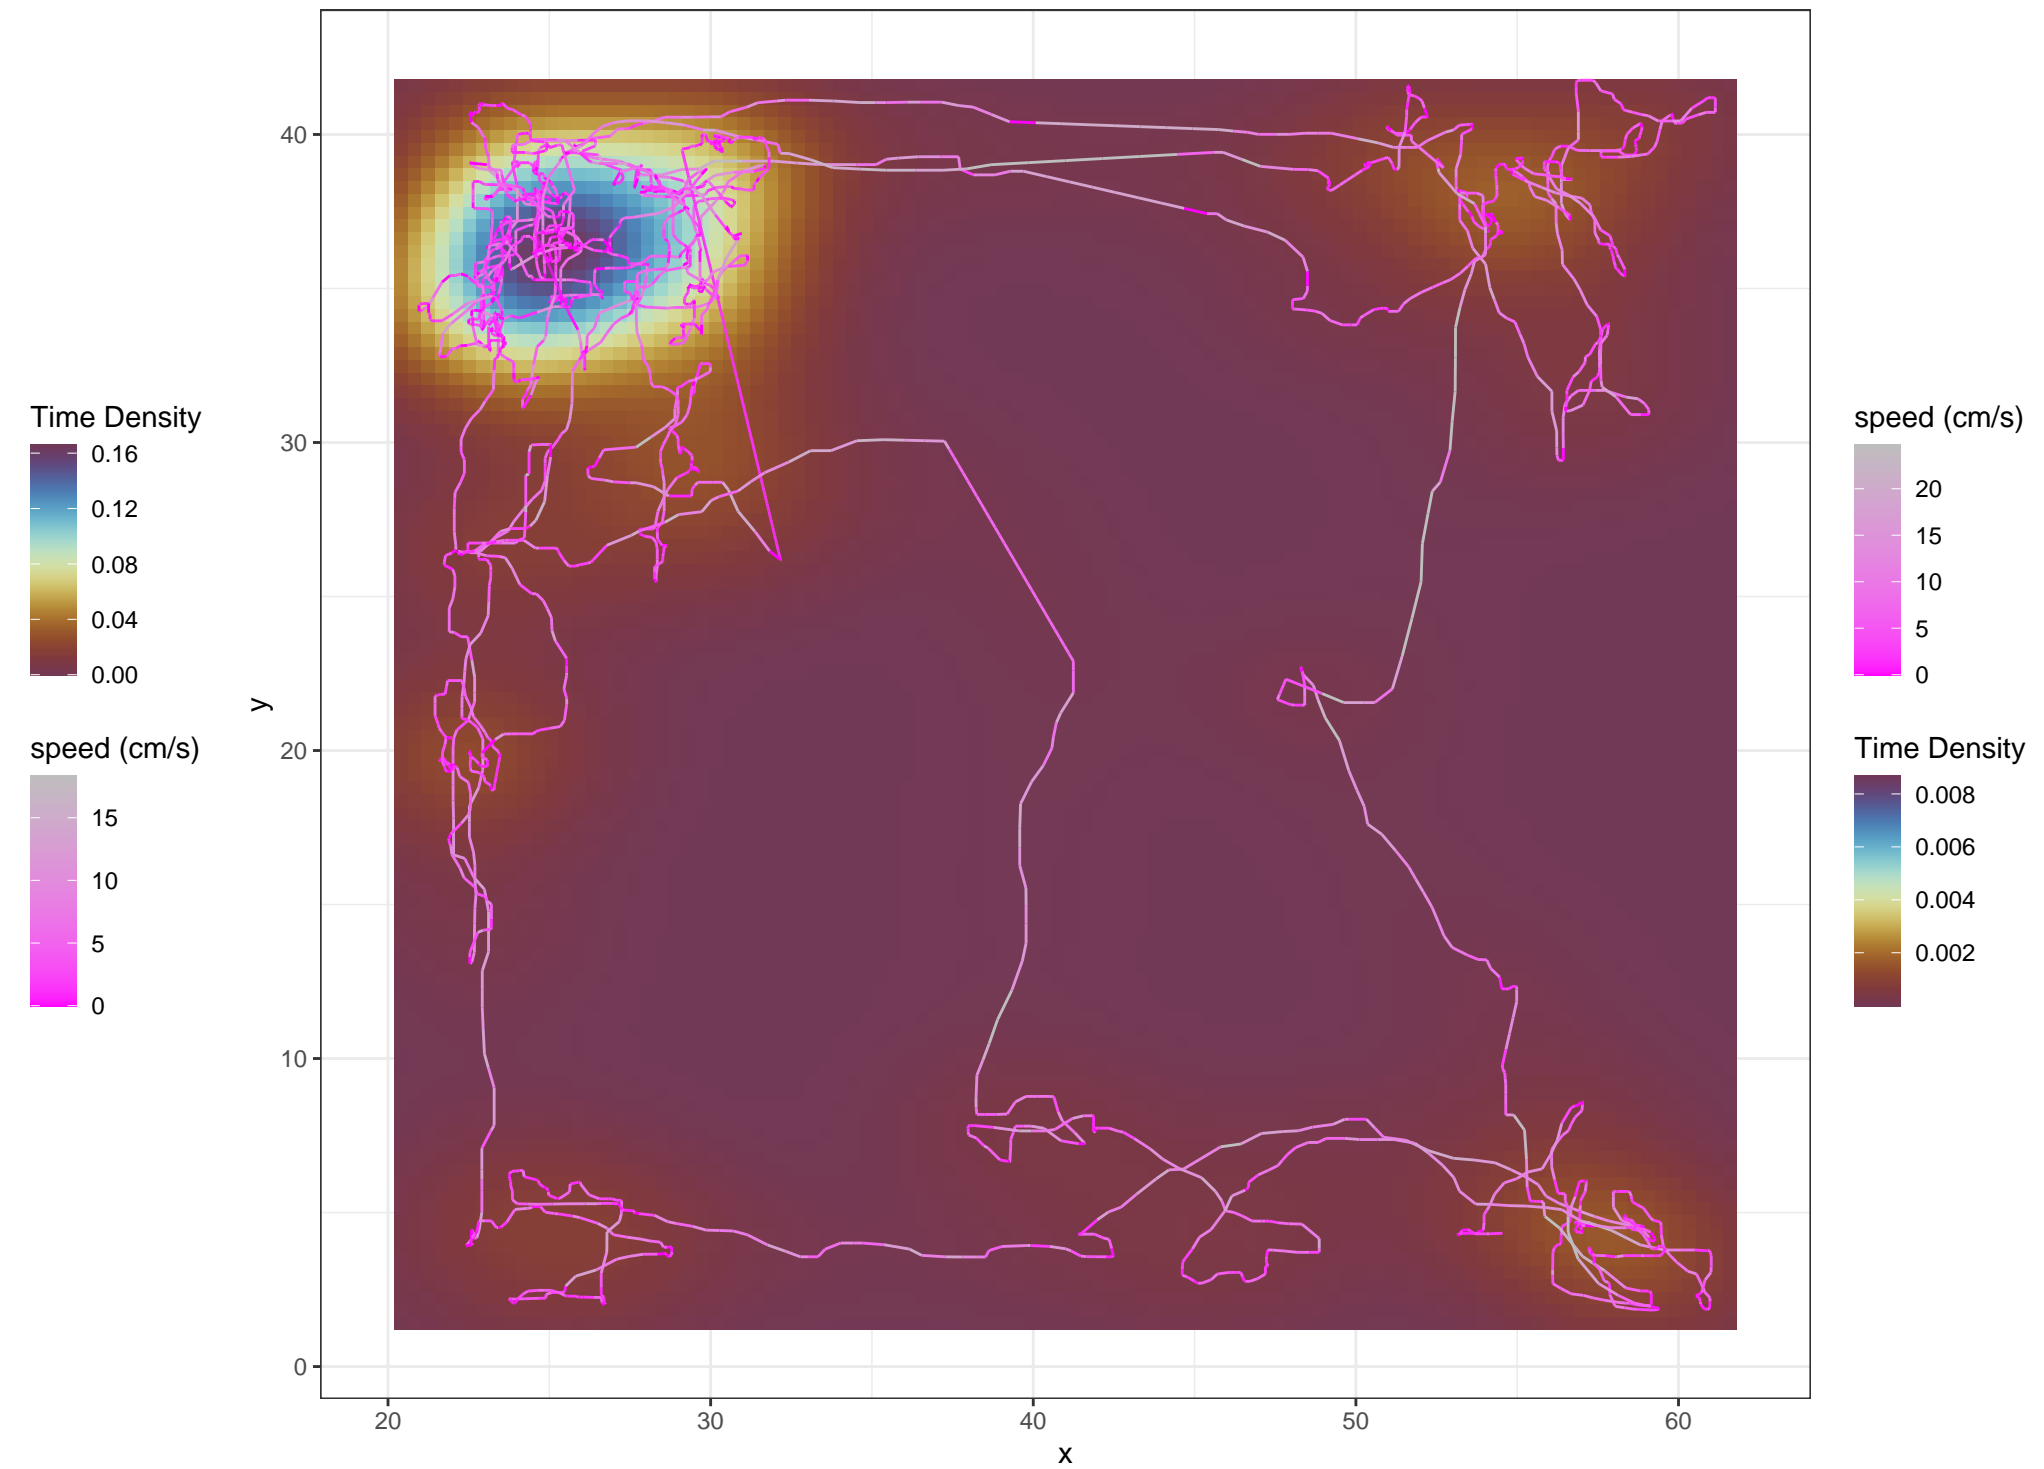

Occiput OF\_top\_Opto\_61-LED1DLC\_resnet50\_OpenFieldDec23shuffle1\_600000\_filtered.csv

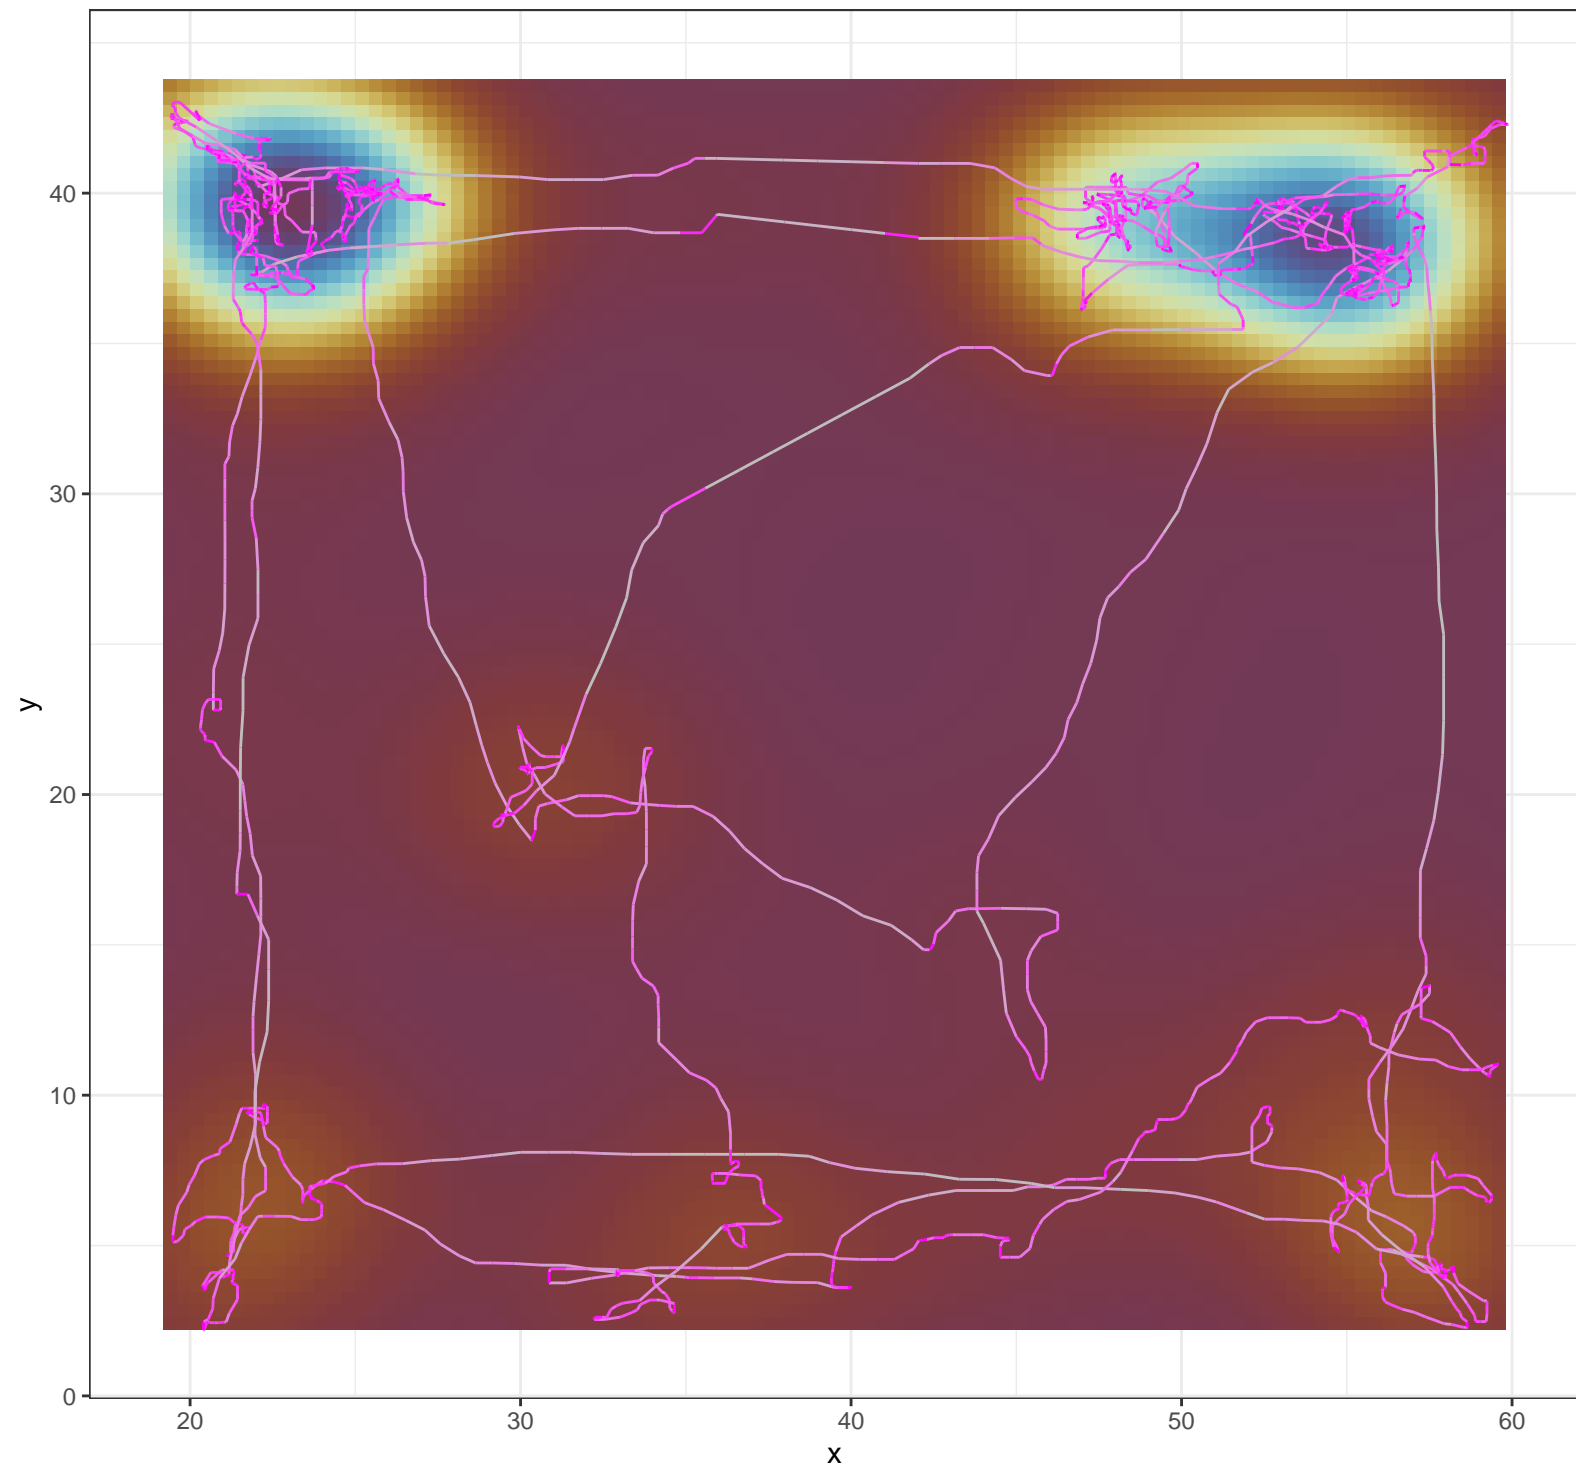

Occiput OF\_top\_Opto\_61-LED1DLC\_resnet50\_OpenFieldDec23shuffle1\_600000\_filtered.csv

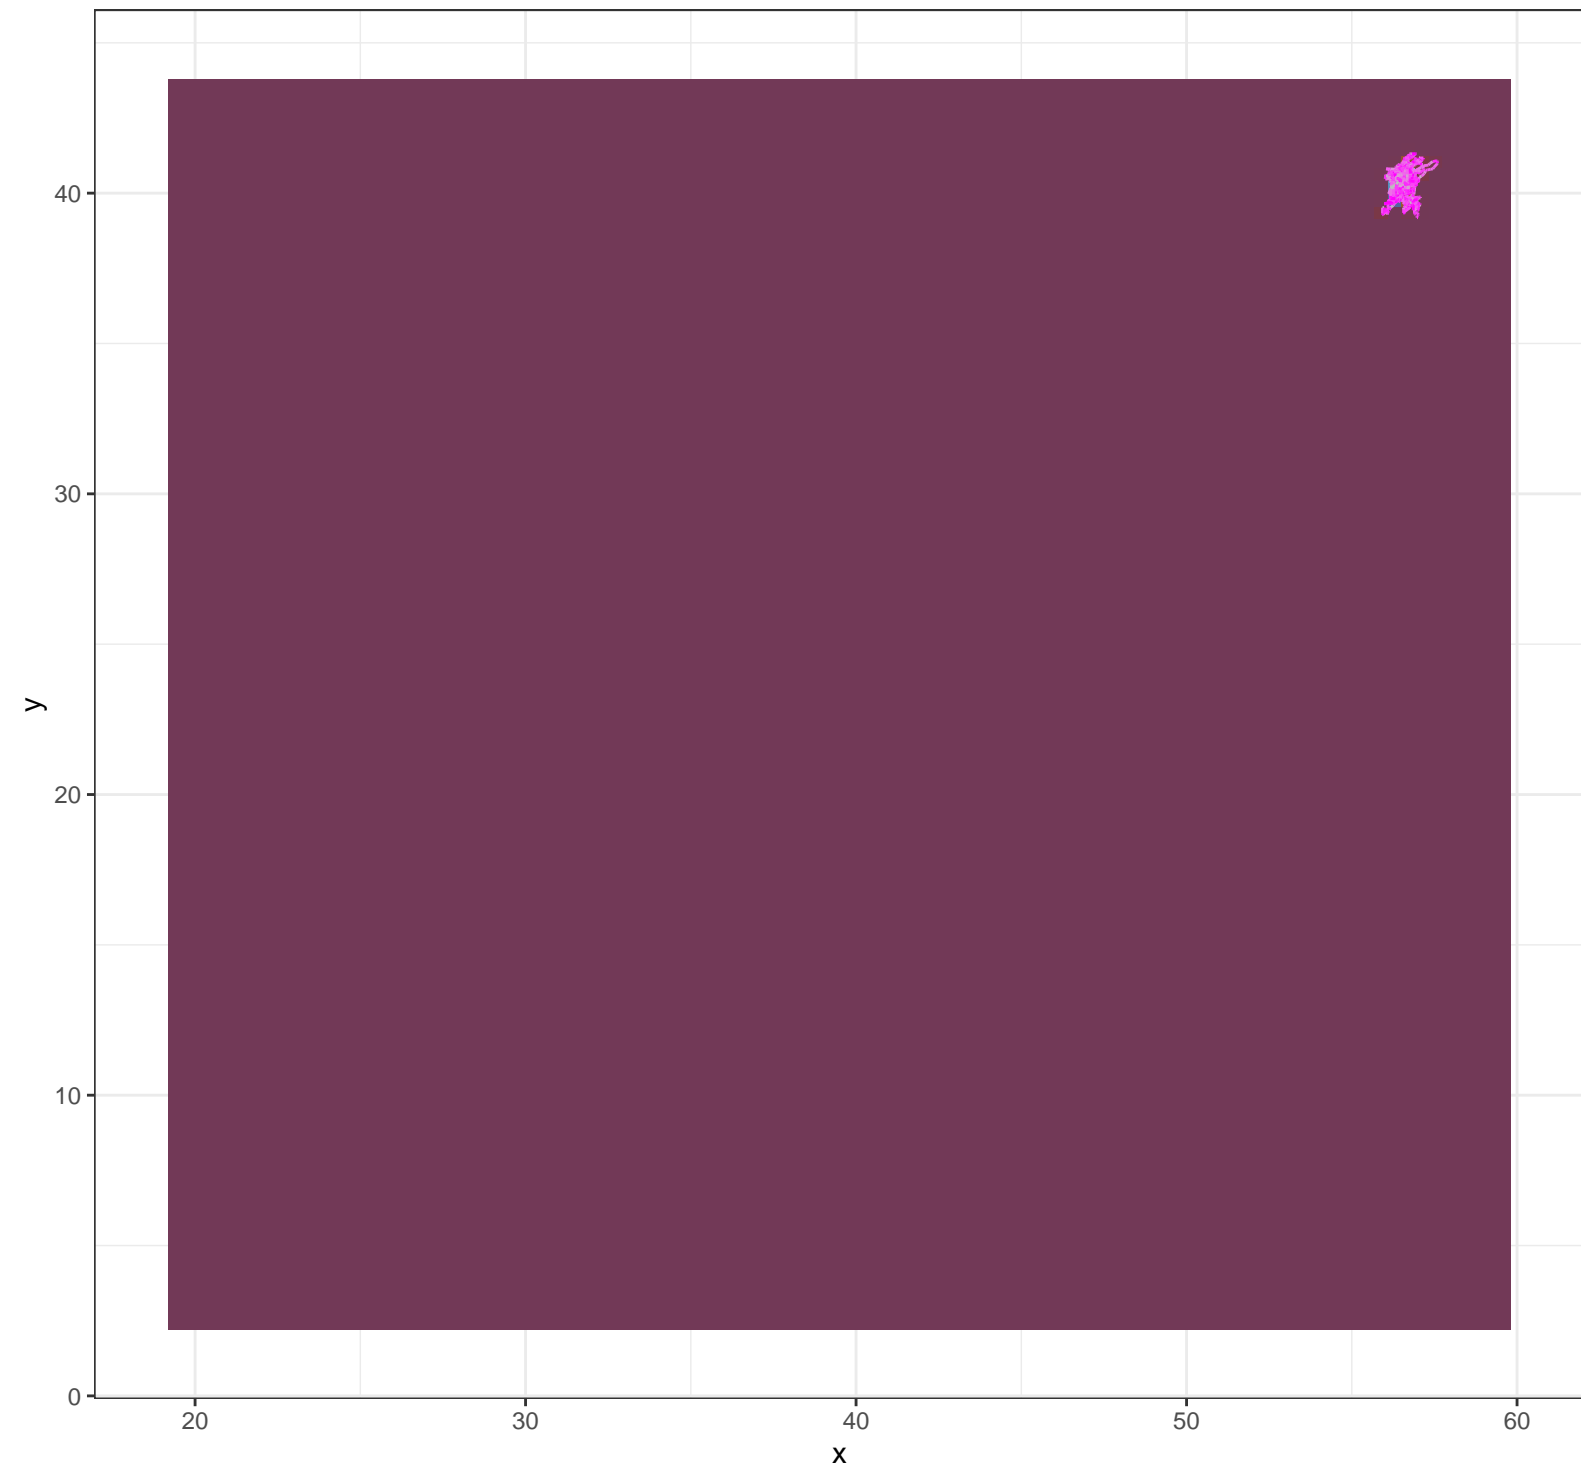

Occiput OF\_top\_Opto\_75-LED1DLC\_resnet50\_OpenFieldDec23shuffle1\_600000\_filtered.csv

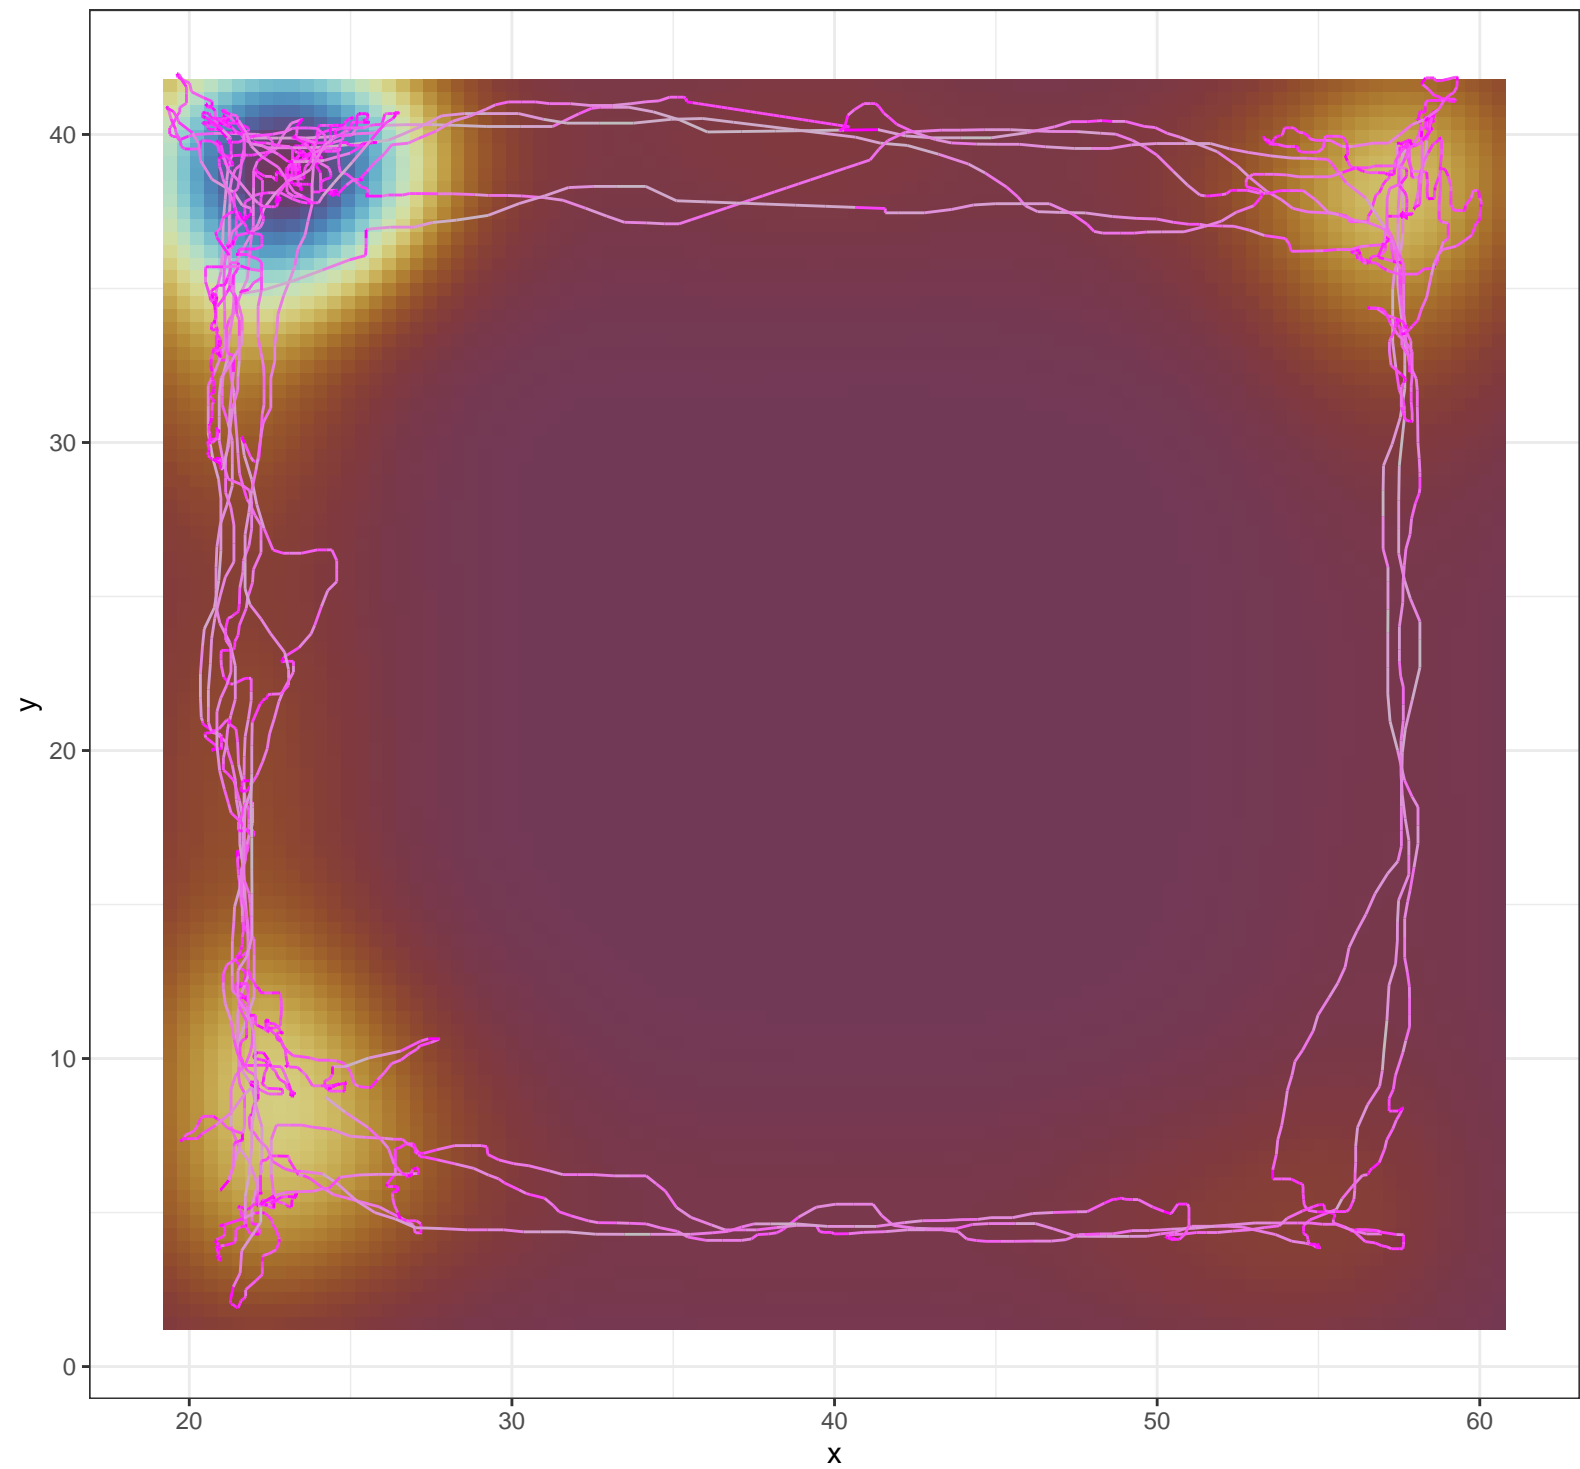

Occiput OF\_top\_Opto\_75-LED1DLC\_resnet50\_OpenFieldDec23shuffle1\_600000\_filtered.csv

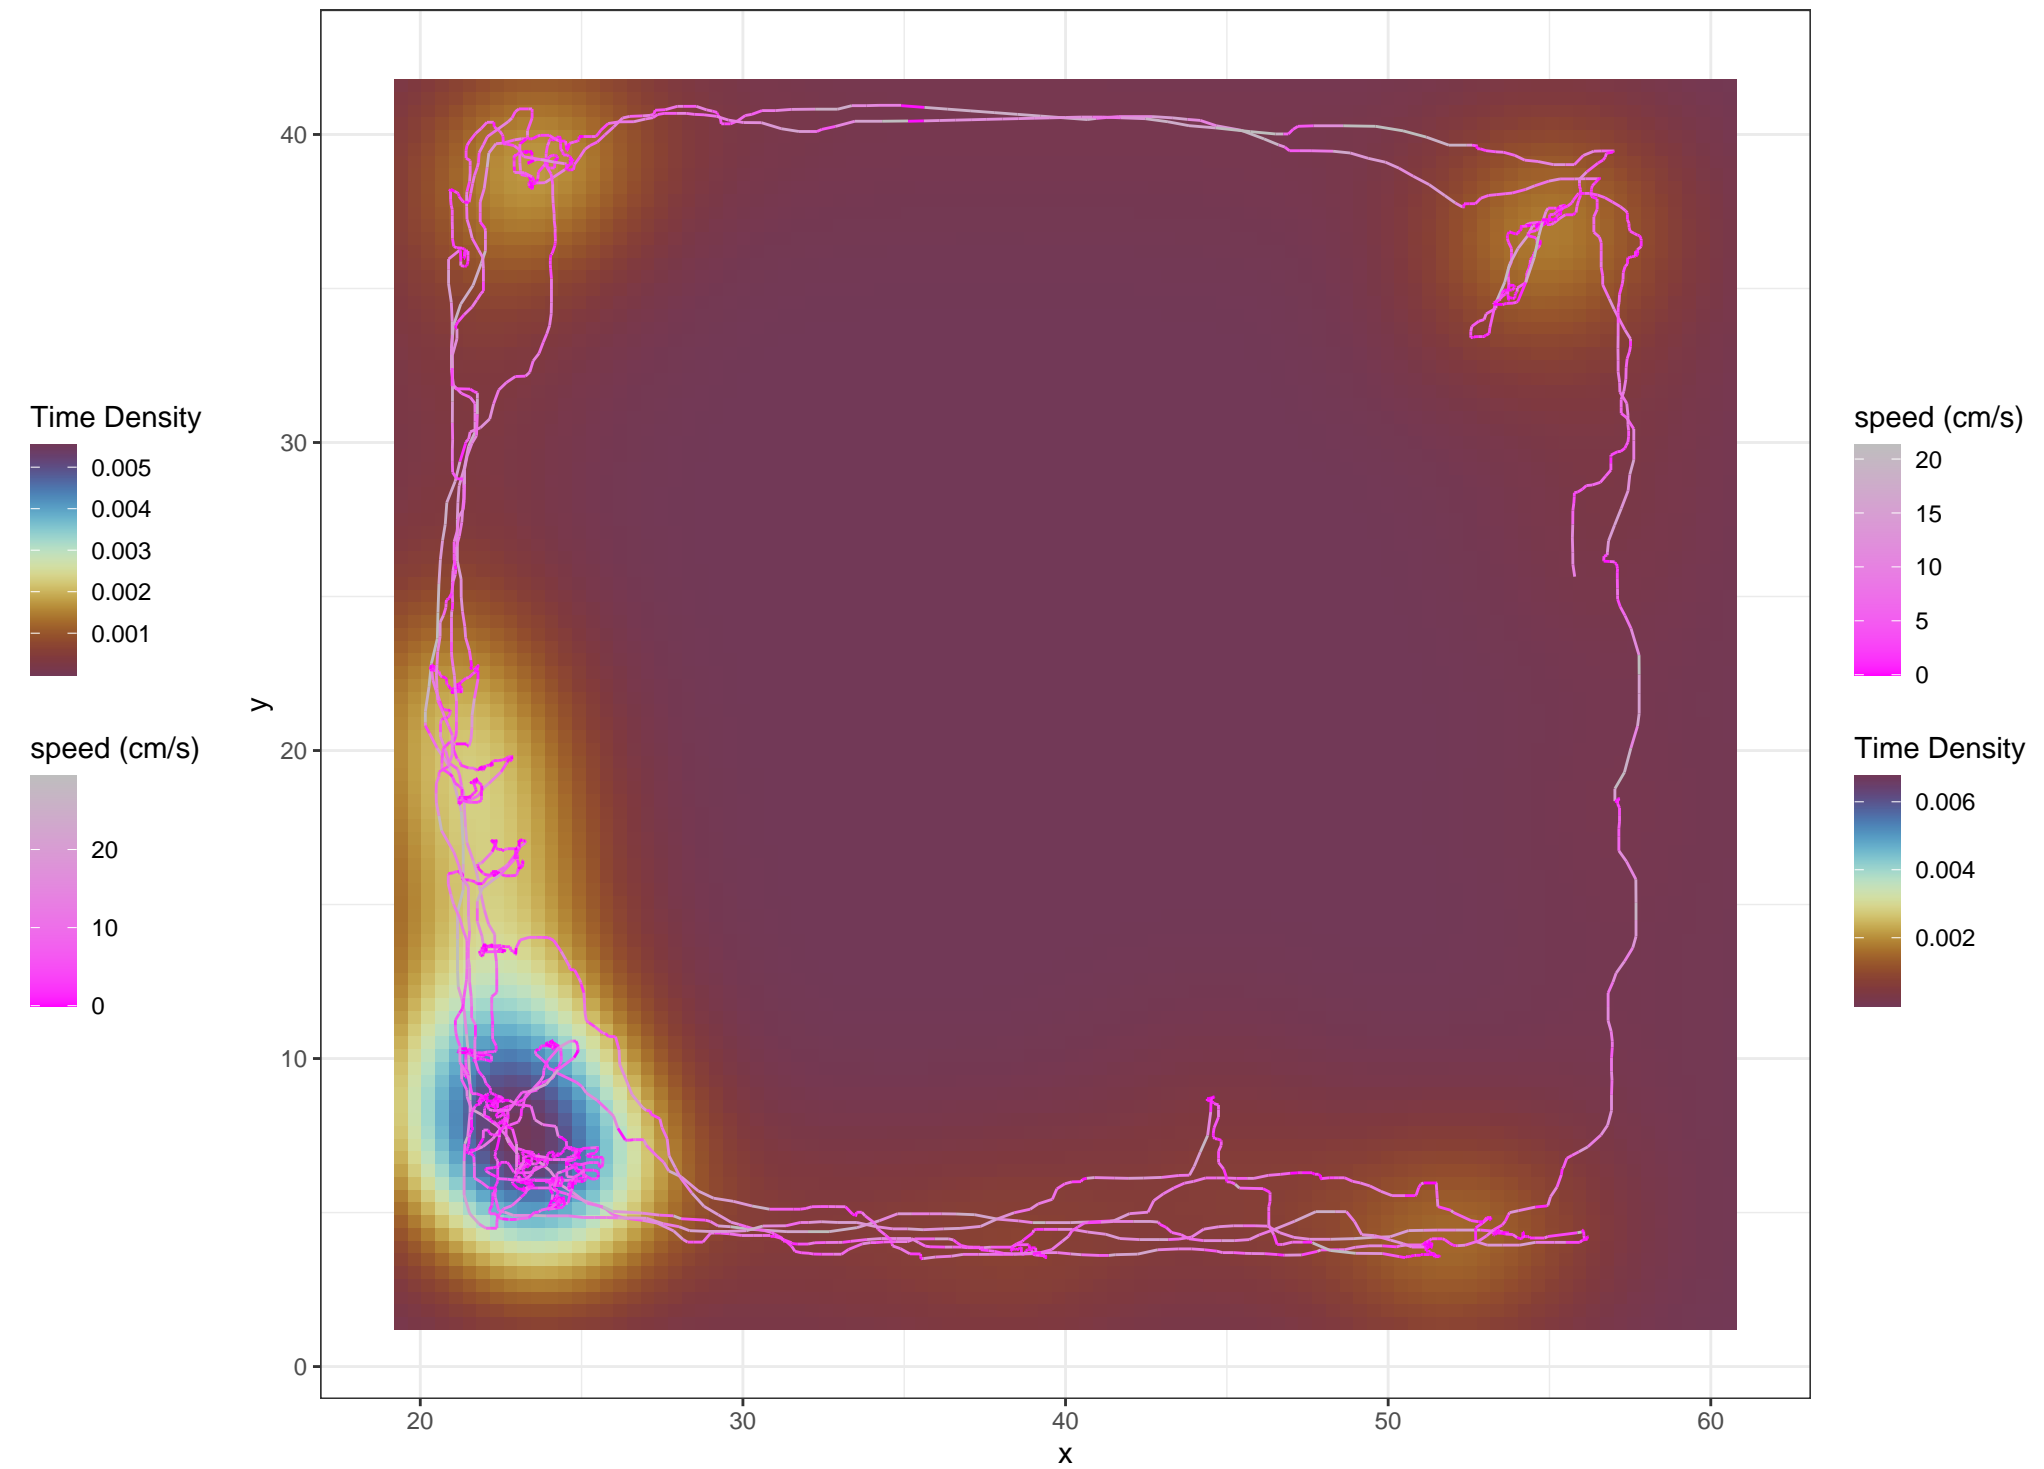

Occiput OF\_top\_Opto\_76-LED1DLC\_resnet50\_OpenFieldDec23shuffle1\_600000\_filtered.csv

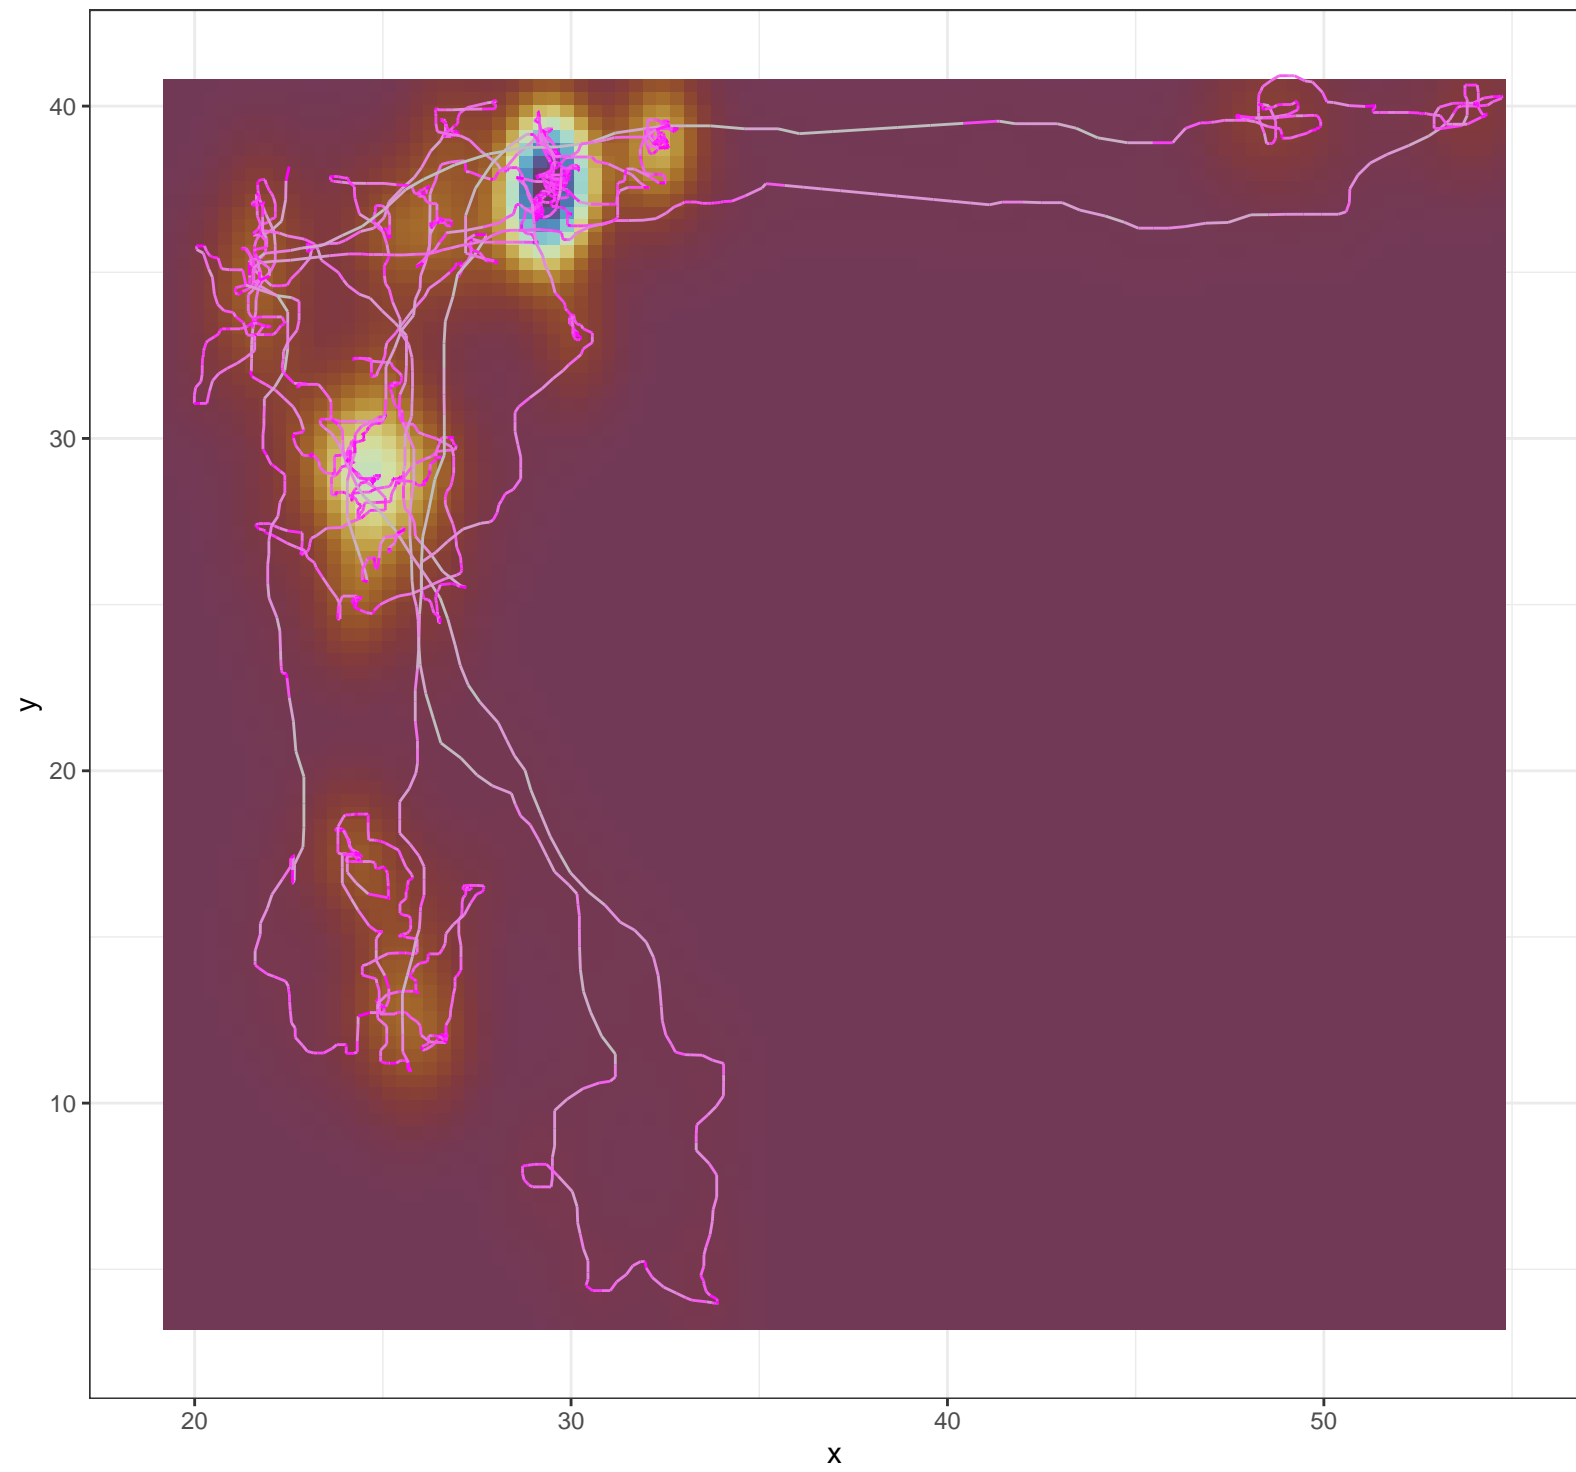

Occiput OF\_top\_Opto\_76-LED1DLC\_resnet50\_OpenFieldDec23shuffle1\_600000\_filtered.csv

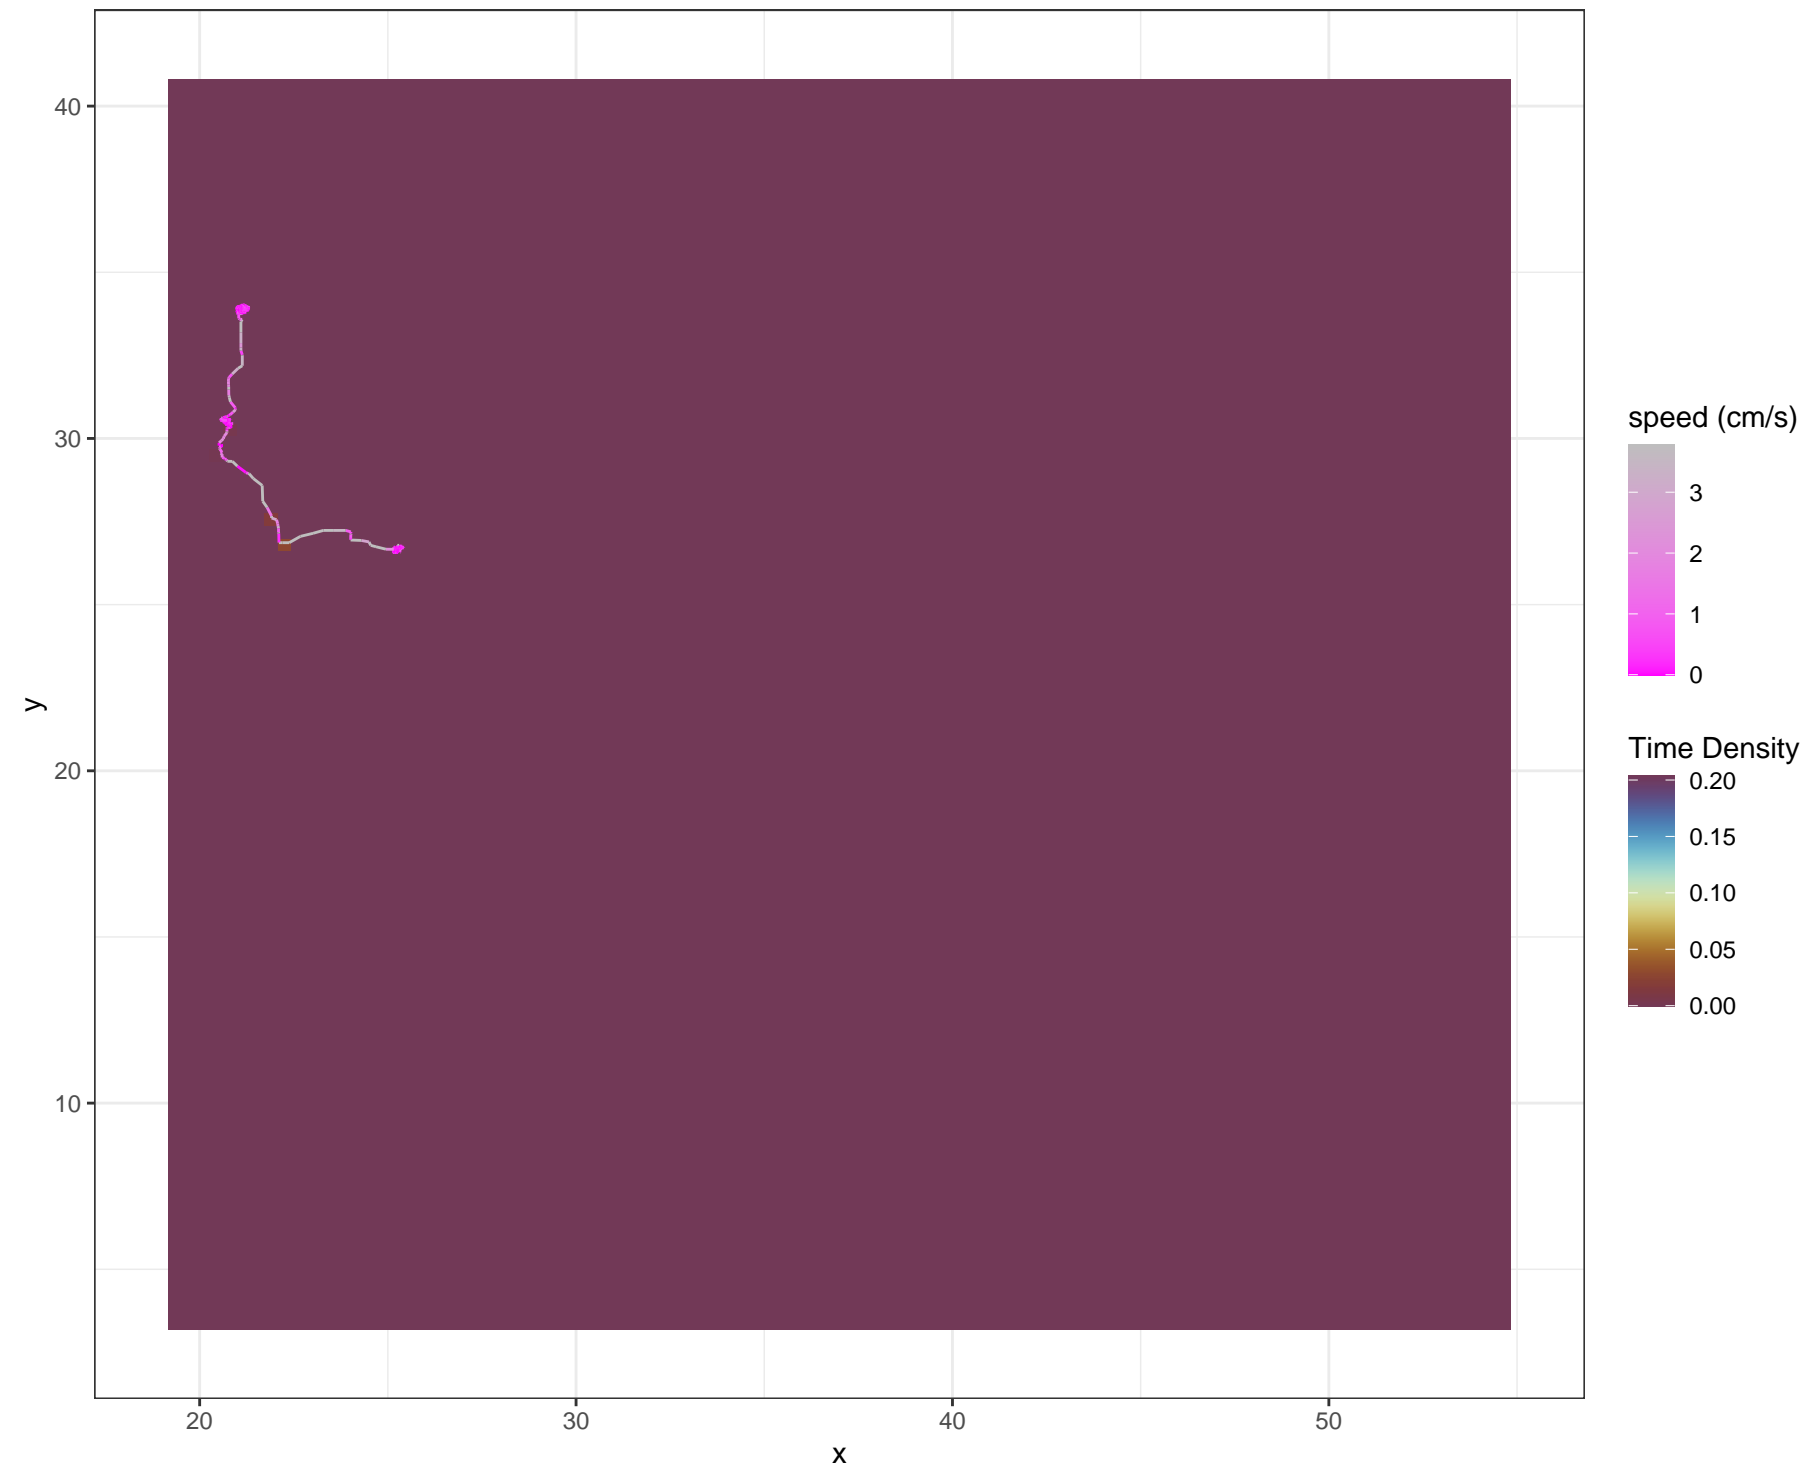



Occiput OF\_top\_Opto\_77-LED1DLC\_resnet50\_OpenFieldDec23shuffle1\_600000\_filtered.csv

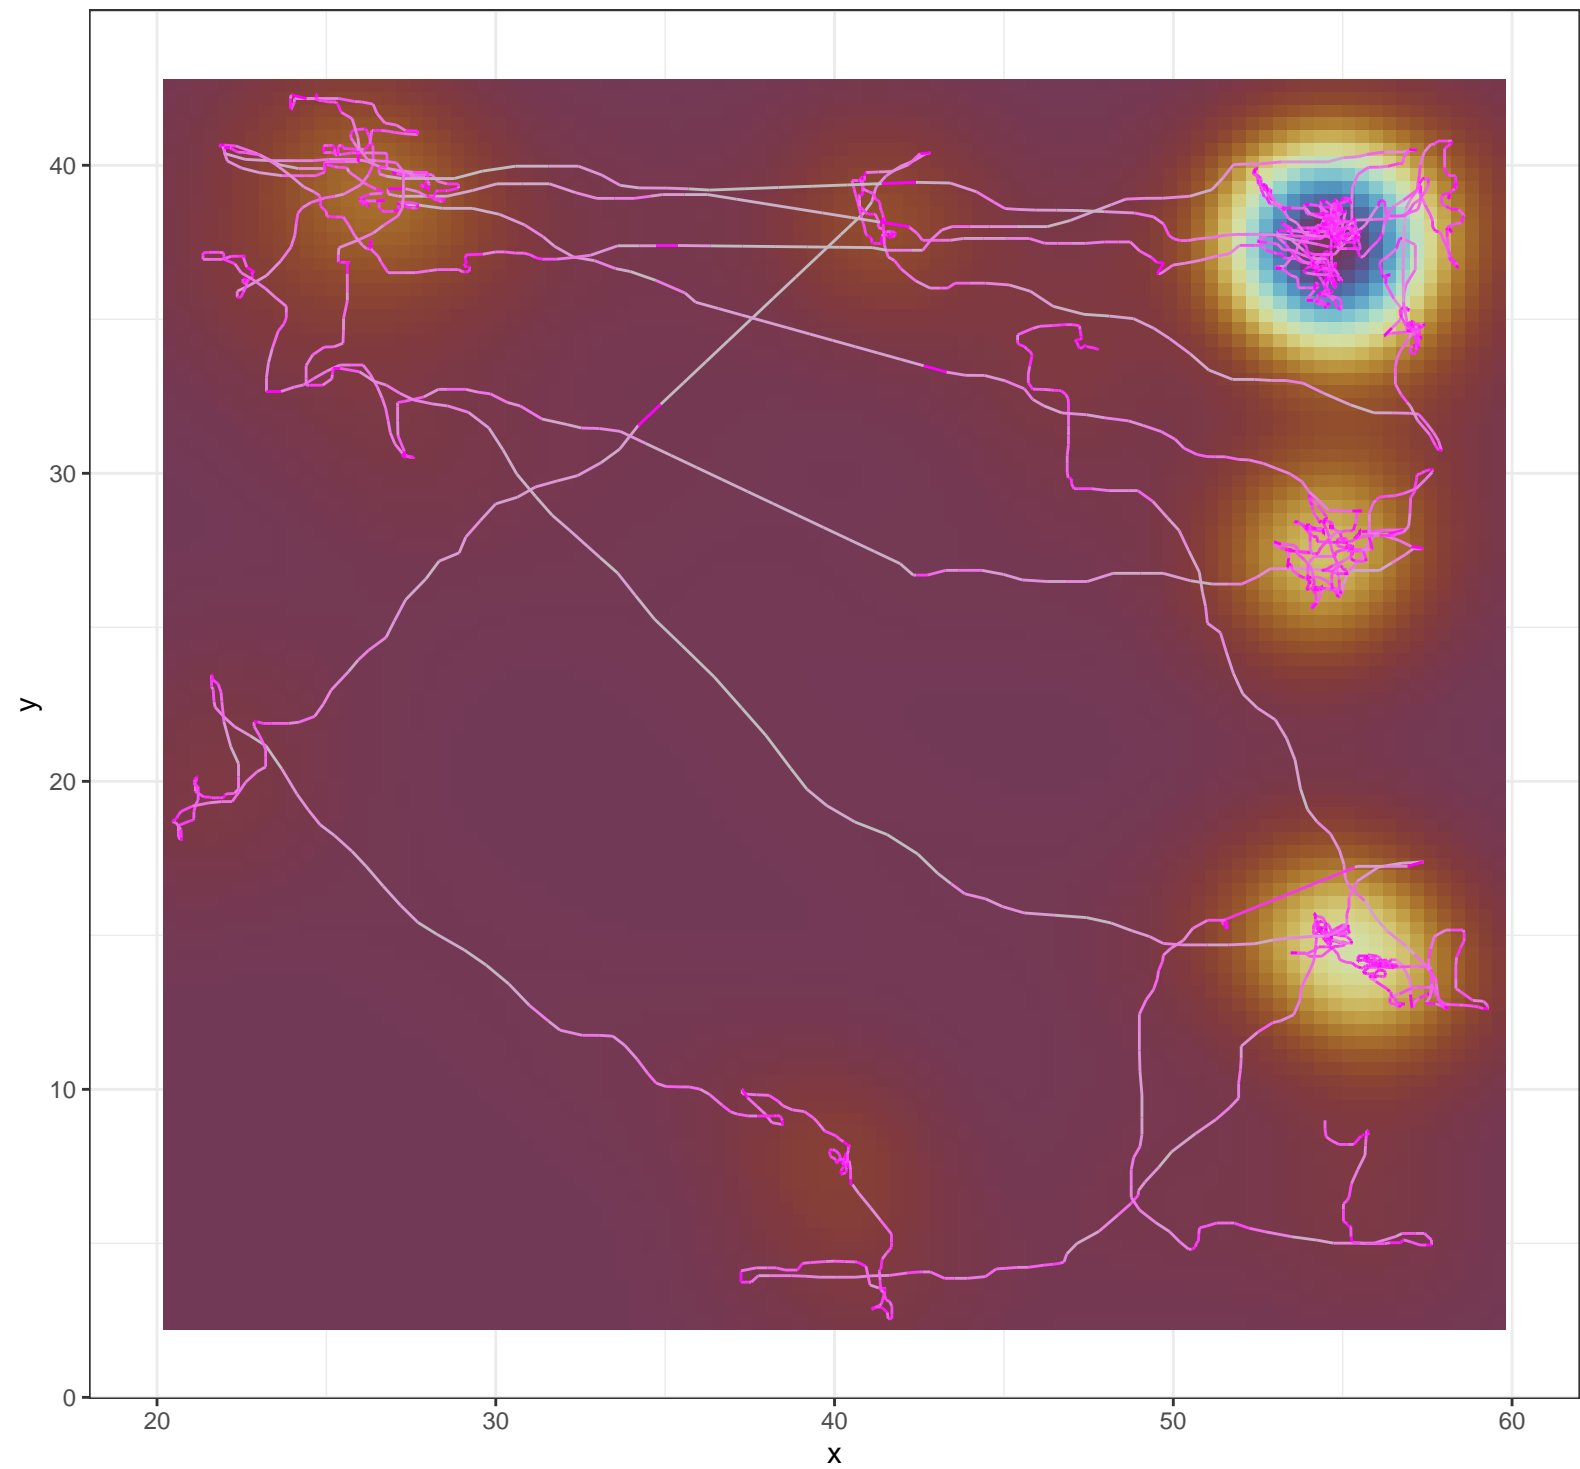

Occiput OF\_top\_Opto\_77-LED1DLC\_resnet50\_OpenFieldDec23shuffle1\_600000\_filtered.csv

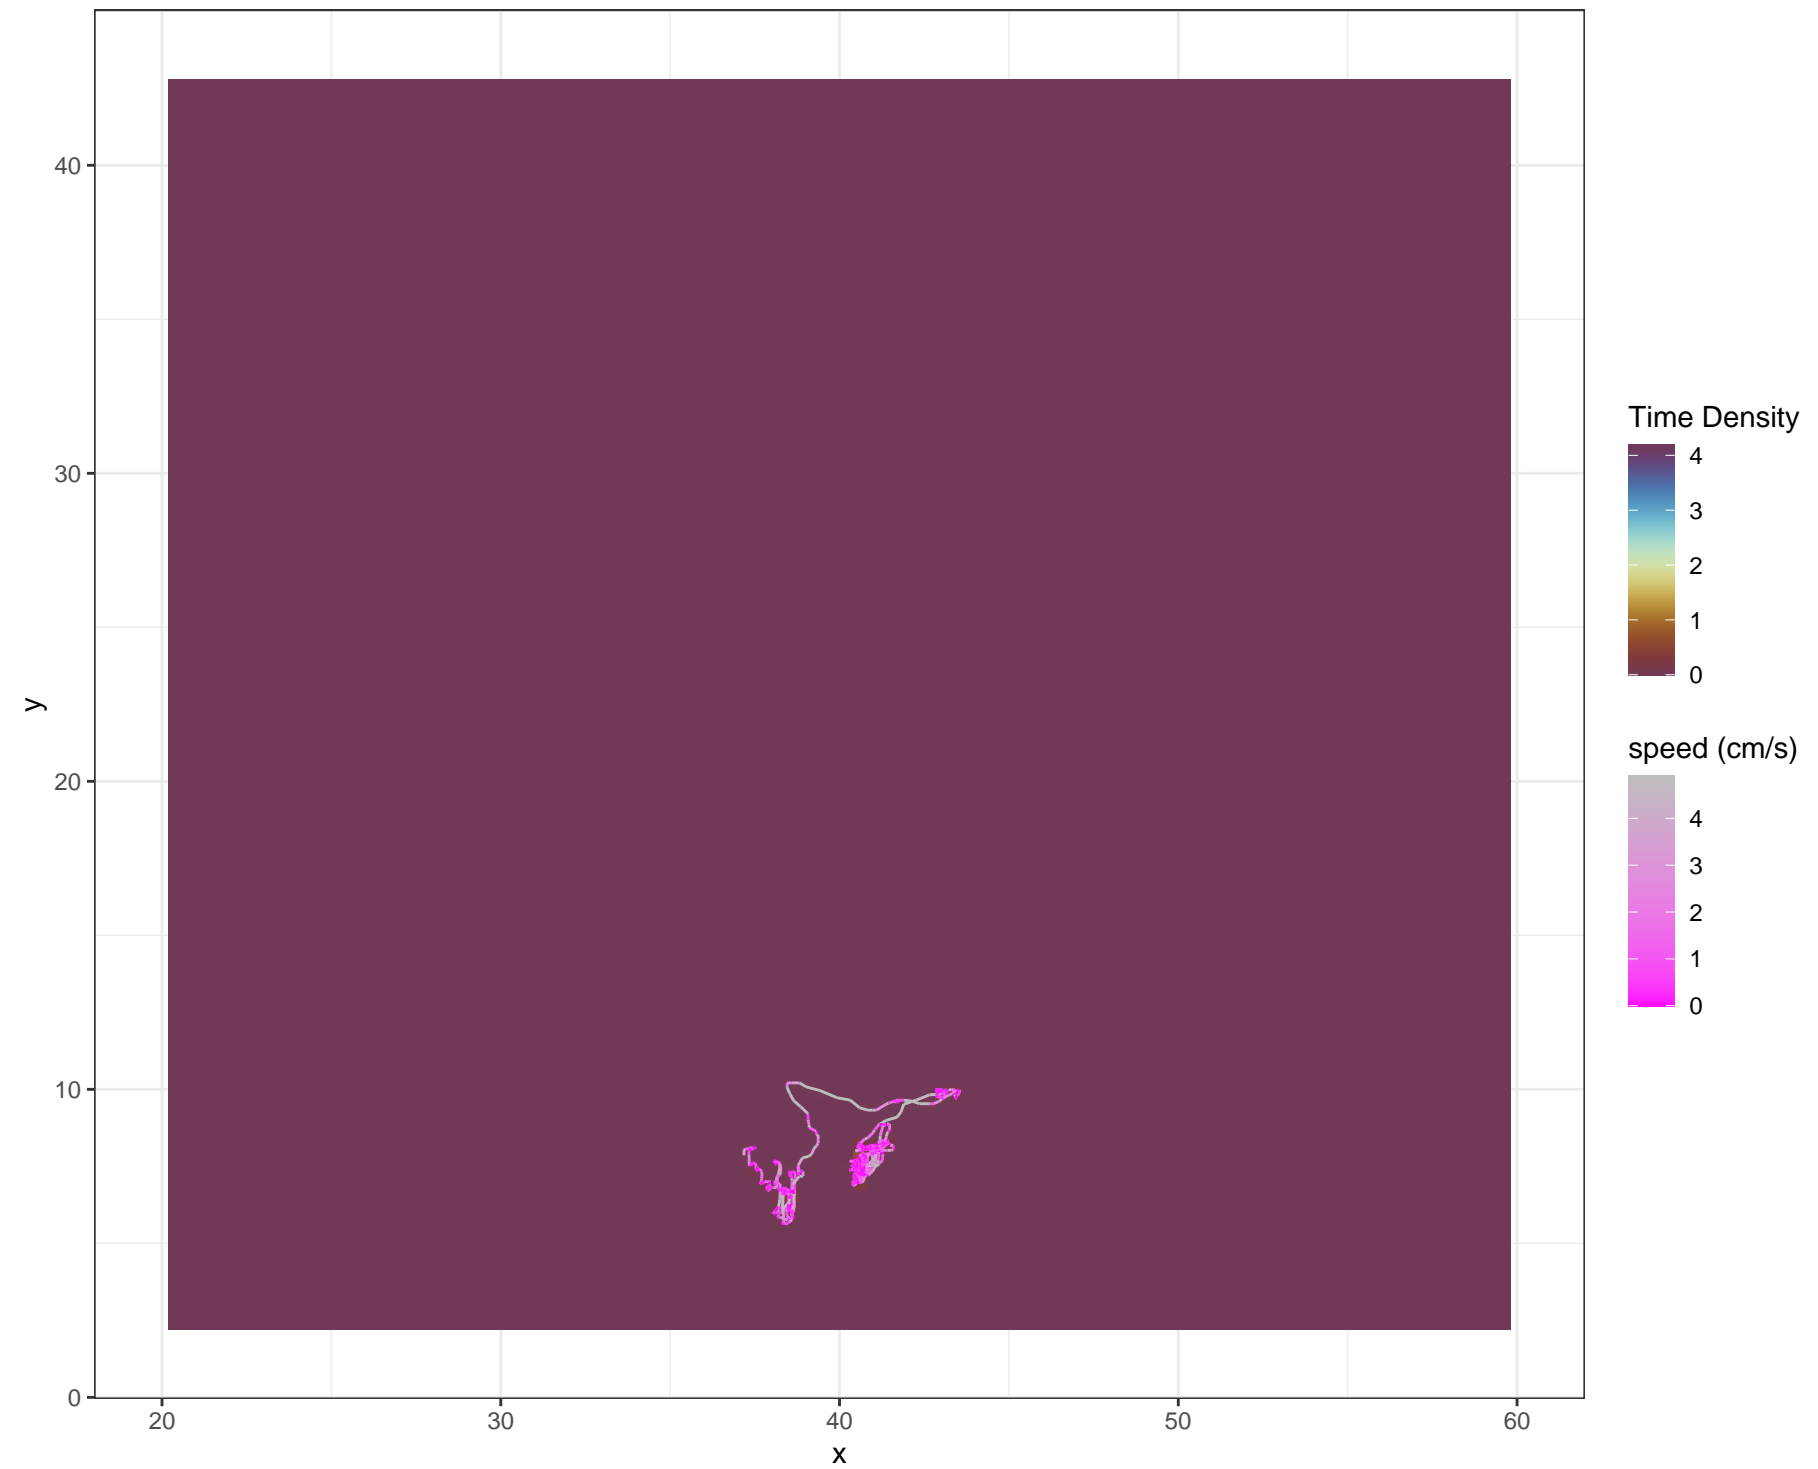

Supplement: elife-86737-supp3.pdf [file elife-86737-supp3.pdf]
